# Supplementary material
Source: Research Square preprint supplement (doi:10.21203/rs.3.rs-8281434/v1)
Supplement: Supplementary file 2 [file d948a41fc4494057ec1bd7ee.xlsx]

## Sheet: S1
Table S1. Sample point information in the deep-sea nodule area
Numbers	Station	Sample name	Sample type	Longitude	Latitude	Water depth (m)	Sampling date (GMT)	Sampling results and quantity	Sample pretreatment method
1	KW1-BC01	BC01	Sediment	-154.242965	9.50699	5187	20230918	1 bag (500 g)	Sampling bag sealed
2	KW1-BC02a	BC02	Sediment	-154.224968	9.50536	5215	20230918	1 bag (500 g)	Sampling bag sealed
3	KW1-BC05	BC05	Sediment	-154.165123	9.51419	5233	20230921	1 bag (500 g)	Sampling bag sealed
4	KW1-BC08	BC08	Sediment	-154.167992	9.50664	5184	20230922	1 bag (500 g)	Sampling bag sealed
5	A5-BC09b	BC09	Sediment	-154.242382	9.48952	5356	20230922	1 bag (500 g)	Sampling bag sealed
6	KW1-BC11a	BC11	Sediment	-154.168604	9.48789	5247	20230923	1 bag (500 g)	Sampling bag sealed
7	A79II_A5_BC46	37A	Sediment	-156.114379	9.49454	5264	20230924	1 bag (500 g)	Sampling bag sealed
8	A79I_A5_BC28a	38A	Sediment	-155.157948	9.57623	5210	20230925	1 bag (500 g)	Sampling bag sealed
9	A791_A5_BC33	39A	Sediment	-155.089945	9.5775	5327	20230925	1 bag (500 g)	Sampling bag sealed
10	A791_A5_BC35	40A	Sediment	-155.087930	9.45352	5366	20230926	1 bag (500 g)	Sampling bag sealed
11	A791_A5_BC22	41A	Sediment	-155.228945	9.64063	5349	20230928	1 bag (500 g)	Sampling bag sealed
12	A79I_A5_BC30a	42A	Sediment	-155.164917	9.70429	5387	20230930	1 bag (500 g)	Sampling bag sealed
13	A79II_A5_BC48	43A	Sediment	-156.114620	9.76114	5385	20231002	1 bag (500 g)	Sampling bag sealed
14	A791_A5_BC18	44A	Sediment	-155.898992	9.45998	5310	20231009	1 bag (500 g)	Sampling bag sealed
15	A79I_A5_BC19	45A	Sediment	-155.899907	9.52204	5341	20231027	1 bag (500 g)	Sampling bag sealed
16	A79I_KW1_BC05	46A	Sediment	-154.275205	9.85698	5393	20231028	1 bag (500 g)	Sampling bag sealed
17	A791_A5_BC32	47A	Sediment	-155.089982	9.64186	5410	20231104	1 bag (500 g)	Sampling bag sealed

## Sheet: S2
Table S2. Species annotation and relative abundance of MAGs from sediment samples in the deep-sea nodule area.
MAGs ID	domain	phylum	class	order	family	genus	species	Mean relative abundance (%)
37A_bin.1	Bacteria	Proteobacteria	Gammaproteobacteria	MnTg04	MnTg04	MnTg04	MnTg04 sp008975185	0.103238
37A_bin.2	Bacteria	Proteobacteria	Gammaproteobacteria	Acidiferrobacterales	SPGG2	SPGG2		0.108452
37A_bin.3	Bacteria	Proteobacteria	Alphaproteobacteria	SMXQ01	SMXQ01			0.360116
37A_bin.4	Bacteria	KSB1	UBA2214	CR04bin15	CR04bin15	N075bin58		0.0885844
37A_bin.5	Bacteria	Desulfobacterota_B	Binatia	UBA9968	UBA9968			0.146417
37A_bin.6	Bacteria	Proteobacteria	Alphaproteobacteria	Rhodospirillales	2-02-FULL-58-16	GCA-2686765		0.513344
37A_bin.7	Bacteria	Nitrospirota	Nitrospiria	Nitrospirales	Nitrospiraceae			0.0866117
38A_bin.1	Bacteria	Proteobacteria	Gammaproteobacteria	Acidiferrobacterales	SPGG2	SZUA-472		0.105031
38A_bin.2	Bacteria	Proteobacteria	Alphaproteobacteria	Rhodospirillales	Casp-alpha2	Casp-alpha2		0.0930921
38A_bin.3	Bacteria	Nitrospirota	Nitrospiria	Nitrospirales	Nitrospiraceae	NS-7		0.0991255
38A_bin.4	Bacteria	Proteobacteria	Gammaproteobacteria	Acidiferrobacterales	SPGG2	SPGG2	SPGG2 sp001643475	0.159969
38A_bin.5	Bacteria	Proteobacteria	Gammaproteobacteria	MnTg04	MnTg04	MnTg04	MnTg04 sp008975185	0.106539
38A_bin.6	Bacteria	Gemmatimonadota	Gemmatimonadetes	Gemmatimonadales	GWC2-71-9	WVYX01		0.0948976
39A_bin.1	Bacteria	Proteobacteria	Gammaproteobacteria	Acidiferrobacterales	SPGG2	SPGG2	SPGG2 sp001643475	0.148571
39A_bin.2	Bacteria	Proteobacteria	Alphaproteobacteria	SMXQ01	SMXQ01			0.372256
39A_bin.3	Bacteria	Gemmatimonadota	Gemmatimonadetes	Gemmatimonadales	GWC2-71-9	WVYX01		0.0890748
39A_bin.4	Bacteria	Desulfobacterota_B	Binatia	UBA9968	UBA9968			0.1534
39A_bin.5	Bacteria	Proteobacteria	Gammaproteobacteria	Acidiferrobacterales	SPGG2	SZUA-472		0.100766
39A_bin.6	Bacteria	Nitrospirota	Nitrospiria	Nitrospirales	Nitrospiraceae			0.103072
39A_bin.7	Bacteria	Proteobacteria	Gammaproteobacteria	MnTg04	MnTg04	MnTg04	MnTg04 sp008975185	0.100588
39A_bin.8	Bacteria	Proteobacteria	Gammaproteobacteria	UBA4486	UBA4486	SMWN01	SMWN01 sp004356415	0.122055
40A_bin.1	Bacteria	Proteobacteria	Gammaproteobacteria	Acidiferrobacterales	SPGG2	SZUA-472		0.100953
40A_bin.2	Bacteria	Nitrospinota	Nitrospinia	Nitrospinales	Nitrospinaceae	SZUA-226	SZUA-226 sp004357365	0.0905652
40A_bin.3	Bacteria	Proteobacteria	Gammaproteobacteria	MnTg04	MnTg04	MnTg04		0.101082
40A_bin.4	Bacteria	Gemmatimonadota	Gemmatimonadetes	Gemmatimonadales	GWC2-71-9			0.0888022
40A_bin.5	Bacteria	Proteobacteria	Gammaproteobacteria	Acidiferrobacterales	SPGG2	SPGG2	SPGG2 sp001643475	0.157366
40A_bin.6	Bacteria	Proteobacteria	Alphaproteobacteria	SMXQ01	SMXQ01			0.38821
40A_bin.7	Bacteria	Proteobacteria	Gammaproteobacteria	UBA4486	UBA4486	SMWN01	SMWN01 sp004356415	0.110201
41A_bin.1	Bacteria	Proteobacteria	Gammaproteobacteria	Woeseiales	Woeseiaceae			0.170786
41A_bin.2	Bacteria	Desulfobacterota_B	Binatia	UBA9968	UBA9968			0.167091
41A_bin.3	Bacteria	Proteobacteria	Gammaproteobacteria	MnTg04	MnTg04	MnTg04		0.0998212
41A_bin.4	Bacteria	Nitrospirota	Nitrospiria	Nitrospirales	Nitrospiraceae	NS-7		0.108459
41A_bin.5	Bacteria	Proteobacteria	Alphaproteobacteria	Rhodospirillales	2-02-FULL-58-16			0.489903
41A_bin.6	Bacteria	Proteobacteria	Alphaproteobacteria	Rhodospirillales	Casp-alpha2	Casp-alpha2		0.0976298
41A_bin.7	Bacteria	KSB1	UBA2214	CR04bin15	CR04bin15	N075bin58		0.0946713
41A_bin.8	Bacteria	Proteobacteria	Gammaproteobacteria	Acidiferrobacterales	SPGG2	SPGG2		0.103355
41A_bin.9	Bacteria	Proteobacteria	Alphaproteobacteria	SMXQ01	SMXQ01			0.395017
42A_bin.1	Bacteria	Nitrospinota	Nitrospinia	Nitrospinales	Nitrospinaceae	SZUA-226	SZUA-226 sp004357365	0.131349
42A_bin.2	Bacteria	Desulfobacterota_B	Binatia	UBA9968	UBA9968			0.153359
42A_bin.3	Bacteria	Proteobacteria	Gammaproteobacteria	Acidiferrobacterales	SPGG2	SPGG2	SPGG2 sp001643475	0.179515
42A_bin.4	Bacteria	Nitrospirota	Nitrospiria	Nitrospirales	Nitrospiraceae	NS-7		0.108472
42A_bin.5	Bacteria	Proteobacteria	Alphaproteobacteria	Rhodospirillales	2-02-FULL-58-16			0.528671
42A_bin.6	Bacteria	Proteobacteria	Alphaproteobacteria	Rhodospirillales	Casp-alpha2	Casp-alpha2		0.0962558
42A_bin.7	Bacteria	Proteobacteria	Alphaproteobacteria	SMXQ01	SMXQ01			0.403563
42A_bin.8	Bacteria	Methylomirabilota	Methylomirabilia	Methylomirabilales	CSP1-5	CSP1-5	CSP1-5 sp001643535	0.168573
42A_bin.9	Bacteria	Proteobacteria	Gammaproteobacteria	Acidiferrobacterales	SPGG2	SPGG2		0.0994288
43A_bin.1	Bacteria	Proteobacteria	Gammaproteobacteria	Acidiferrobacterales	SPGG2	SPGG2	SPGG2 sp001643475	0.160375
43A_bin.10	Bacteria	Proteobacteria	Alphaproteobacteria	SMXQ01	SMXQ01			0.376344
43A_bin.11	Bacteria	Proteobacteria	Gammaproteobacteria	MnTg04	MnTg04	MnTg04	MnTg04 sp008975185	0.109688
43A_bin.2	Bacteria	Nitrospirota	Nitrospiria	Nitrospirales	Nitrospiraceae			0.100961
43A_bin.3	Bacteria	Proteobacteria	Alphaproteobacteria	Rhodospirillales	Casp-alpha2	Casp-alpha2		0.104892
43A_bin.4	Bacteria	Proteobacteria	Gammaproteobacteria	Woeseiales	Woeseiaceae			0.165668
43A_bin.5	Bacteria	Proteobacteria	Gammaproteobacteria	Burkholderiales	Nitrosomonadaceae	GCA-2721545		0.0753807
43A_bin.6	Bacteria	Proteobacteria	Gammaproteobacteria	Acidiferrobacterales	SPGG2	SZUA-472		0.105453
43A_bin.7								0.257085
43A_bin.8	Bacteria	Actinobacteriota	Acidimicrobiia	UBA5794	ZC4RG35	SZUA-217	SZUA-217 sp004356805	0.0792241
43A_bin.9	Bacteria	KSB1	UBA2214	CR04bin15	CR04bin15	N075bin58		0.0915085
44A_bin.1	Bacteria	Proteobacteria	Gammaproteobacteria	Acidiferrobacterales	SPGG2	SZUA-472		0.0999224
44A_bin.10	Bacteria	Proteobacteria	Alphaproteobacteria	SMXQ01	SMXQ01			0.434934
44A_bin.11	Bacteria	Proteobacteria	Gammaproteobacteria	Acidiferrobacterales	SPGG2	SPGG2	SPGG2 sp001643475	0.16504
44A_bin.13	Bacteria	Proteobacteria	Alphaproteobacteria	Rhodospirillales	2-02-FULL-58-16			0.514123
44A_bin.2	Bacteria	Proteobacteria	Gammaproteobacteria	MnTg04	MnTg04	MnTg04	MnTg04 sp008975185	0.0964859
44A_bin.3	Bacteria	Methylomirabilota	Methylomirabilia	Methylomirabilales	CSP1-5	CSP1-5	CSP1-5 sp001643535	0.185232
44A_bin.4	Bacteria	Proteobacteria	Alphaproteobacteria	Rhodospirillales	Casp-alpha2	Casp-alpha2		0.0902028
44A_bin.5	Bacteria	Desulfobacterota_B	Binatia	UBA9968	UBA9968			0.188722
44A_bin.6	Bacteria	Nitrospinota	Nitrospinia	Nitrospinales	Nitrospinaceae	SZUA-226	SZUA-226 sp004357365	0.0830292
44A_bin.7	Bacteria	KSB1	UBA2214	CR04bin15	CR04bin15	N075bin58		0.101347
44A_bin.8	Bacteria	Proteobacteria	Gammaproteobacteria	Woeseiales	Woeseiaceae			0.179202
44A_bin.9	Bacteria	Gemmatimonadota	Gemmatimonadetes	Gemmatimonadales	GWC2-71-9			0.0897685
45A_bin.1	Bacteria	Proteobacteria	Gammaproteobacteria	Burkholderiales	Nitrosomonadaceae	GCA-2721545		0.0722826
45A_bin.10	Bacteria	Proteobacteria	Alphaproteobacteria	Rhodospirillales	Casp-alpha2	Casp-alpha2		0.0961439
45A_bin.11	Bacteria	Methylomirabilota	Methylomirabilia	Methylomirabilales	CSP1-5	CSP1-5	CSP1-5 sp012974305	0.087534
45A_bin.12	Bacteria	Gemmatimonadota	Gemmatimonadetes	Gemmatimonadales	GWC2-71-9			0.0883499
45A_bin.13	Bacteria	Proteobacteria	Gammaproteobacteria	GCA-001735895	GCA-001735895	GCA-001735895		0.0571034
45A_bin.2	Bacteria	Proteobacteria	Gammaproteobacteria	Acidiferrobacterales	SPGG2	SPGG2	SPGG2 sp001643475	0.161167
45A_bin.3	Bacteria	Proteobacteria	Alphaproteobacteria	SMXQ01	SMXQ01			0.420717
45A_bin.4	Bacteria	Methylomirabilota	Methylomirabilia	Methylomirabilales	CSP1-5	CSP1-5	CSP1-5 sp001643535	0.183957
45A_bin.5	Bacteria	Proteobacteria	Gammaproteobacteria	MnTg04	MnTg04	MnTg04	MnTg04 sp008975185	0.101908
45A_bin.6	Bacteria	Acidobacteriota	Acidobacteriae	Acidoferrales	2-02-FULL-67-57			0.0681253
45A_bin.7	Bacteria	Nitrospirota	Nitrospiria	Nitrospirales	Nitrospiraceae	NS-7		0.104065
45A_bin.8	Bacteria	Proteobacteria	Gammaproteobacteria	Acidiferrobacterales	SPGG2	SZUA-472		0.0996836
45A_bin.9	Bacteria	Proteobacteria	Gammaproteobacteria	Woeseiales	Woeseiaceae			0.177282
46A_bin.1	Bacteria	Proteobacteria	Gammaproteobacteria	Acidiferrobacterales	SPGG2	SPGG2	SPGG2 sp001643475	0.175444
46A_bin.2	Bacteria	Methylomirabilota	Methylomirabilia	Methylomirabilales	CSP1-5	CSP1-5	CSP1-5 sp012974305	0.0892009
46A_bin.3	Bacteria	Proteobacteria	Gammaproteobacteria	Woeseiales	Woeseiaceae			0.190101
46A_bin.4	Bacteria	Proteobacteria	Alphaproteobacteria	Rhodospirillales	2-02-FULL-58-16			0.510437
46A_bin.5	Bacteria	Nitrospirota	Nitrospiria	Nitrospirales	Nitrospiraceae			0.116094
46A_bin.6	Bacteria	Proteobacteria	Gammaproteobacteria	MnTg04	MnTg04	MnTg04	MnTg04 sp008975185	0.102304
46A_bin.7	Bacteria	Proteobacteria	Gammaproteobacteria	Acidiferrobacterales	SPGG2	SZUA-472		0.107637
46A_bin.8	Bacteria	Proteobacteria	Alphaproteobacteria	Rhodospirillales	Casp-alpha2	Casp-alpha2		0.102119
46A_bin.9	Bacteria	Methylomirabilota	Methylomirabilia	Methylomirabilales	CSP1-5	CSP1-5	CSP1-5 sp001643535	0.170882
47A_bin.1	Bacteria	Methylomirabilota	Methylomirabilia	Methylomirabilales	CSP1-5	CSP1-5	CSP1-5 sp001643535	0.181872
47A_bin.10	Bacteria	Proteobacteria	Alphaproteobacteria	Rhodospirillales	Casp-alpha2	Casp-alpha2		0.107506
47A_bin.11	Bacteria	Methylomirabilota	Methylomirabilia	Methylomirabilales	CSP1-5	CSP1-5	CSP1-5 sp012974305	0.0805966
47A_bin.12	Bacteria	Proteobacteria	Gammaproteobacteria	MnTg04	MnTg04	MnTg04	MnTg04 sp008975185	0.0991494
47A_bin.13	Bacteria	Proteobacteria	Gammaproteobacteria	Acidiferrobacterales	SPGG2	SZUA-472		0.0975527
47A_bin.14	Bacteria	Acidobacteriota	Acidobacteriae	Acidoferrales	2-02-FULL-67-57			0.068694
47A_bin.2	Bacteria	Proteobacteria	Gammaproteobacteria	Woeseiales	Woeseiaceae			0.177273
47A_bin.3	Bacteria	Nitrospirota	Nitrospiria	Nitrospirales	Nitrospiraceae	40CM-3-62-11		0.118695
47A_bin.4	Bacteria	Desulfobacterota_B	Binatia	UBA9968	UBA9968			0.176669
47A_bin.5	Bacteria	Proteobacteria	Alphaproteobacteria	JAAXGF01	JAAXGF01			0.10854
47A_bin.6	Bacteria	Proteobacteria	Alphaproteobacteria	SMXQ01	SMXQ01			0.433698
47A_bin.7	Bacteria	Proteobacteria	Gammaproteobacteria	Burkholderiales	Nitrosomonadaceae	GCA-2721545		0.0706356
47A_bin.8	Bacteria	Nitrospinota	Nitrospinia	Nitrospinales	Nitrospinaceae	SZUA-226	SZUA-226 sp004357365	0.0910432
47A_bin.9	Bacteria	Proteobacteria	Gammaproteobacteria	Acidiferrobacterales	SPGG2	SPGG2	SPGG2 sp001643475	0.292584
BC1_bin.1	Bacteria	Desulfobacterota_B	Binatia	UBA9968	UBA9968			0.223529
BC1_bin.10	Bacteria	Methylomirabilota	Methylomirabilia	Methylomirabilales	CSP1-5	CSP1-5	CSP1-5 sp001643535	0.1996
BC1_bin.11	Bacteria	KSB1	UBA2214	CR04bin15	CR04bin15	N075bin58		0.165094
BC1_bin.12	Bacteria	Proteobacteria	Alphaproteobacteria	Rhodospirillales	Casp-alpha2	Casp-alpha2		0.581379
BC1_bin.2	Bacteria	Proteobacteria	Gammaproteobacteria	Acidiferrobacterales	SPGG2	SPGG2	SPGG2 sp001643475	0.258187
BC1_bin.3	Bacteria	Actinobacteriota	Acidimicrobiia	UBA5794	ZC4RG35	SZUA-217	SZUA-217 sp004356805	0.283925
BC1_bin.4	Bacteria	Nitrospirota	Nitrospiria	Nitrospirales				0.478408
BC1_bin.5	Bacteria	Proteobacteria	Alphaproteobacteria	Rhodospirillales	2-02-FULL-58-16			0.191394
BC1_bin.6	Bacteria	Proteobacteria	Gammaproteobacteria	Woeseiales	Woeseiaceae			0.525967
BC1_bin.7	Bacteria	Chloroflexota	Dehalococcoidia	SM23-28-2	RBG-16-64-32	RBG-16-64-32		0.49801
BC1_bin.8	Bacteria	Proteobacteria	Alphaproteobacteria	SMXQ01	SMXQ01			0.232039
BC1_bin.9	Bacteria	Proteobacteria	Gammaproteobacteria	Acidiferrobacterales	SPGG2			0.162646
BC11_bin.1	Bacteria	Proteobacteria	Alphaproteobacteria	Rhodospirillales	2-02-FULL-58-16			0.217115
BC11_bin.2	Bacteria	Proteobacteria	Alphaproteobacteria	SMXQ01	SMXQ01			0.284977
BC11_bin.3	Bacteria	Chloroflexota	Dehalococcoidia	SM23-28-2	RBG-16-64-32	RBG-16-64-32		0.289853
BC11_bin.4	Bacteria	Methylomirabilota	Methylomirabilia	Methylomirabilales	CSP1-5	CSP1-5	CSP1-5 sp001643535	0.29595
BC2_bin.1	Bacteria	Nitrospirota	Nitrospiria	Nitrospirales	Nitrospiraceae			0.168838
BC2_bin.2	Bacteria	Proteobacteria	Gammaproteobacteria	Woeseiales	Woeseiaceae			0.250484
BC2_bin.3	Bacteria	Proteobacteria	Alphaproteobacteria	Rhodospirillales	2-02-FULL-58-16			0.521806
BC2_bin.4	Bacteria	Gemmatimonadota	Gemmatimonadetes	KS3-K002	JABDQB01			0.321177
BC2_bin.5	Bacteria	Desulfobacterota_B	Binatia	UBA9968	UBA9968			0.230327
BC2_bin.6	Bacteria	Proteobacteria	Alphaproteobacteria	SMXQ01	SMXQ01			0.467501
BC5_bin.1	Bacteria	Proteobacteria	Alphaproteobacteria	SMXQ01	SMXQ01			0.428829
BC5_bin.10	Bacteria	Proteobacteria	Alphaproteobacteria	Rhizobiales	Hyphomicrobiaceae	Hyphomicrobium_A		0.231186
BC5_bin.11	Bacteria	Nitrospirota	Nitrospiria	Nitrospirales	Nitrospiraceae			0.147479
BC5_bin.12	Bacteria	Nitrospinota	Nitrospinia	Nitrospinales	Nitrospinaceae	SZUA-226	SZUA-226 sp004357365	0.259758
BC5_bin.2	Bacteria	Proteobacteria	Alphaproteobacteria	Rhodospirillales	2-02-FULL-58-16			0.521329
BC5_bin.3	Bacteria	KSB1	UBA2214	CR04bin15	CR04bin15	N075bin58		0.240268
BC5_bin.4	Bacteria	Proteobacteria	Gammaproteobacteria	Acidiferrobacterales	SPGG2	SPGG2	SPGG2 sp001643475	0.197447
BC5_bin.5	Bacteria	Chloroflexota	Dehalococcoidia	SM23-28-2	RBG-16-64-32	RBG-16-64-32		0.293711
BC5_bin.6	Bacteria	Proteobacteria	Gammaproteobacteria	Woeseiales	Woeseiaceae			0.259862
BC5_bin.7	Bacteria	Desulfobacterota_B	Binatia	UBA9968	UBA9968			0.15905
BC5_bin.8	Bacteria	Nitrospirota	Nitrospiria	Nitrospirales	UBA8639	SPGG5		0.293528
BC5_bin.9								0.258321
BC8_bin.1	Bacteria	Actinobacteriota	Acidimicrobiia	UBA5794	UBA5794			0.29254
BC8_bin.10	Bacteria	Desulfobacterota_B	Binatia	UBA9968				0.252541
BC8_bin.11	Bacteria	Proteobacteria	Alphaproteobacteria	Rhodospirillales	2-02-FULL-58-16			0.600487
BC8_bin.12								0.857754
BC8_bin.13	Bacteria	Nitrospinota	Nitrospinia	Nitrospinales	Nitrospinaceae	SZUA-226	SZUA-226 sp004357365	0.275293
BC8_bin.15	Bacteria	JACPSX01	JACPSX01					0.208812
BC8_bin.2	Bacteria	Methylomirabilota	Methylomirabilia	Methylomirabilales	CSP1-5	CSP1-5	CSP1-5 sp001643535	0.295297
BC8_bin.3	Bacteria	Proteobacteria	Gammaproteobacteria	Acidiferrobacterales	SPGG2	SZUA-472		0.203983
BC8_bin.4	Bacteria	Methylomirabilota	Methylomirabilia	Methylomirabilales	CSP1-5	CSP1-5	CSP1-5 sp012974305	0.293051
BC8_bin.5	Bacteria	Nitrospirota	Nitrospiria	Nitrospirales	Nitrospiraceae			0.16534
BC8_bin.6	Bacteria	Proteobacteria	Alphaproteobacteria	Rhodospirillales	Casp-alpha2	Casp-alpha2		0.300071
BC8_bin.7	Bacteria	Proteobacteria	Gammaproteobacteria	Woeseiales	Woeseiaceae			0.268541
BC8_bin.8	Bacteria	Acidobacteriota	Acidobacteriae	Acidoferrales	2-02-FULL-67-57			0.405695
BC8_bin.9	Bacteria	Proteobacteria	Alphaproteobacteria	SMXQ01	SMXQ01			0.491702
BC9_bin.1	Bacteria	Proteobacteria	Alphaproteobacteria	Rhodospirillales	2-02-FULL-58-16			0.538329
BC9_bin.2	Bacteria	Proteobacteria	Gammaproteobacteria	Acidiferrobacterales	SPGG2	SPGG2	SPGG2 sp001643475	0.203602
BC9_bin.3	Bacteria	Actinobacteriota	Acidimicrobiia	UBA5794	UBA5794			0.229323
BC9_bin.4	Bacteria	Proteobacteria	Alphaproteobacteria	SMXQ01	SMXQ01			0.416948
BC9_bin.5	Bacteria	Desulfobacterota_B	Binatia	UBA9968	UBA9968			0.171011
BC9_bin.6	Bacteria	Chloroflexota	Dehalococcoidia	SM23-28-2	RBG-16-64-32	RBG-16-64-32		0.260677

## Sheet: S3
Table S3. Species annotation and relative abundance of MAGs from nodule samples in the deep-sea nodule area.
MAGs ID	domain	phylum	class	order	family	genus	species	Mean relative abundance (%)
9CJW_1	Bacteria	Chlamydiota	Chlamydiia	Chlamydiales	Rhabdochlamydiaceae			0.0498868
9CJW_11	Bacteria	Proteobacteria	Alphaproteobacteria	UBA828				0.0776524
9CJW_12	Bacteria	Proteobacteria	Alphaproteobacteria	SMXQ01	SMXQ01			0.529053
9CJW_13	Bacteria	Acidobacteriota	Vicinamibacteria	Bin61				0.0773175
9CJW_14	Bacteria	Proteobacteria	Gammaproteobacteria	Woeseiales	Woeseiaceae			0.116626
9CJW_17	Bacteria	Chloroflexota	Dehalococcoidia	UBA2979	UBA2979			0.0667547
9CJW_19	Bacteria	Myxococcota	Polyangia	Polyangiales	SG8-38			0.055091
9CJW_2	Bacteria	Proteobacteria	Alphaproteobacteria	Sphingomonadales	SMXR01			0.128291
9CJW_20	Archaea	Thermoproteota	Nitrososphaeria	Nitrososphaerales	Nitrosopumilaceae			0.262417
9CJW_21	Bacteria	Planctomycetota	Phycisphaerae	UBA1845	UBA1845	JACQXM01		0.322862
9CJW_22	Bacteria	Proteobacteria	Alphaproteobacteria	MPNO01	MPNO01			0.192768
9CJW_23	Bacteria	Acidobacteriota	Mor1	QHYA01				0.066612
9CJW_24	Bacteria	Nitrospinota	Nitrospinia	Nitrospinales	Nitrospinaceae	SZUA-226		0.152306
9CJW_26	Bacteria	Desulfobacterota_D	UBA1144	UBA2774	N074bin48	N074bin48	N074bin48 sp004356685	0.11788
9CJW_28	Bacteria	Proteobacteria	Alphaproteobacteria	Kiloniellales	J153			0.219662
9CJW_29	Bacteria	Proteobacteria	Alphaproteobacteria	Rhodospirillales	2-02-FULL-58-16			0.384679
9CJW_30	Bacteria	Gemmatimonadota	Gemmatimonadetes	KS3-K002	JABDQB01			0.34852
9CJW_33	Bacteria	KSB1	UBA2214	CR04bin15	CR04bin15	N075bin58		0.597442
9CJW_34	Bacteria	Proteobacteria	Alphaproteobacteria	GCA-2731375	GCA-2731375			0.0562801
9CJW_35	Bacteria	Chloroflexota	Dehalococcoidia	SM23-28-2	RBG-16-64-32	RBG-16-64-32		0.753125
9CJW_4	Bacteria	Nitrospirota	Nitrospiria	Nitrospirales	UBA8639	UBA8639		0.110976
9CJW_40	Archaea	Thermoproteota	Nitrososphaeria	Nitrososphaerales	Nitrosopumilaceae	CSP1-1		0.967336
9CJW_42	Bacteria	Nitrospirota	Nitrospiria	Nitrospirales	Nitrospiraceae	NS-7		0.150989
9CJW_43	Bacteria	Bacteroidota	Bacteroidia	Cytophagales	Cyclobacteriaceae			0.0920476
9CJW_44	Bacteria	Acidobacteriota	Vicinamibacteria	Bin61				0.218949
9CJW_45	Archaea	Thermoproteota	Nitrososphaeria	Nitrososphaerales	Nitrosopumilaceae	Nitrosopumilus		0.380987
9CJW_46	Bacteria	Proteobacteria	Gammaproteobacteria	Burkholderiales	Nitrosomonadaceae	GCA-2721545		0.174923
9CJW_47	Bacteria	Proteobacteria	Alphaproteobacteria	UBA8366	JADFVY01	JADFVY01		0.189354
9CJW_48	Bacteria	Proteobacteria	Gammaproteobacteria	GCA-001735895	GCA-001735895			0.0924208
9CJW_49	Bacteria	Hydrogenedentota	Hydrogenedentia	Hydrogenedentiales				0.176043
9CJW_5	Bacteria	Proteobacteria	Gammaproteobacteria	UBA6522	UBA6522	SMWC01		0.140043
9CJW_50	Bacteria	Dependentiae	Babeliae	Babeliales	Vermiphilaceae			0.055492
9CJW_51	Archaea	Thermoproteota	Nitrososphaeria	Nitrososphaerales	Nitrosopumilaceae	CSP1-1		0.912706
9CJW_54	Bacteria	Methylomirabilota	Methylomirabilia	Methylomirabilales	CSP1-5	CSP1-5		0.186306
9CJW_55	Bacteria							0.10107
9CJW_56	Bacteria	Desulfobacterota_D	UBA1144	UBA2774				0.0737511
9CJW_57	Bacteria	Proteobacteria	Gammaproteobacteria	JABDLF01	JABDLF01			0.220518
9CJW_58	Bacteria	Gemmatimonadota	Gemmatimonadetes	Gemmatimonadales	GWC2-71-9	N074bin45		0.289414
9CJW_59	Bacteria	Chloroflexota	Anaerolineae	Anaerolineales	UBA11579	QWJF01		0.078611
9CJW_6	Bacteria	Proteobacteria	Alphaproteobacteria	Rhizobiales	Rhizobiaceae	Mesorhizobium		0.0809184
9CJW_60	Bacteria	Chloroflexota	Dehalococcoidia	SM23-28-2	RBG-16-64-32	RBG-16-64-32		0.373431
9CJW_61	Bacteria	Myxococcota_A	UBA9160	UBA9160	SMWR01			0.118031
9CJW_63	Bacteria	Myxococcota_A	UBA9160	UBA9160	UBA6930			0.100659
9CJW_64	Bacteria	Proteobacteria	Gammaproteobacteria	Woeseiales	Woeseiaceae	JAACFB01		0.123156
9CJW_65	Bacteria	Acidobacteriota	UBA6911	RPQK01	RPQK01			0.0549933
9CJW_66	Bacteria	Gemmatimonadota	Gemmatimonadetes	Gemmatimonadales	GWC2-71-9	WVYX01		0.413336
9CJW_67	Bacteria	Acidobacteriota	Acidobacteriae	Acidoferrales	2-02-FULL-67-57			0.356315
9CJW_68	Bacteria	Actinobacteriota	Acidimicrobiia	UBA5794	SHLN01			0.139371
9CJW_7	Archaea	Thermoproteota	Nitrososphaeria	Nitrososphaerales	Nitrosopumilaceae	JACEMX01		0.498674
9CJW_70	Bacteria	Proteobacteria	Gammaproteobacteria	Woeseiales	Woeseiaceae	UBA1844		0.183604
9CJW_71	Bacteria	Chloroflexota	Anaerolineae	Anaerolineales	UBA11579	QWJF01		0.0850128
9CJW_73	Bacteria	Methylomirabilota	Methylomirabilia	Methylomirabilales	CSP1-5	CSP1-5	CSP1-5 sp001643535	0.168842
9CJW_74	Bacteria	Proteobacteria	Gammaproteobacteria	Acidiferrobacterales	SPGG2	SPGG2		0.332834
9CJW_76	Bacteria	Methylomirabilota	Methylomirabilia	Methylomirabilales	CSP1-5	CSP1-5	CSP1-5 sp012974305	0.16064
9CJW_78	Bacteria	Proteobacteria	Alphaproteobacteria	Rhizobiales	Hyphomicrobiaceae	Hyphomicrobium_A		0.100198
9CJW_79	Bacteria	Gemmatimonadota	Gemmatimonadetes	KS3-K002	JABDQB01			0.206454
9CJW_8	Bacteria	Acidobacteriota	Thermoanaerobaculia	UBA5704				0.0758823
9CJW_80	Bacteria	UBA10199	UBA10199	DSSB01	DSSB01			0.0354247
9CJW_81	Bacteria	Proteobacteria	Alphaproteobacteria	Bin65				0.144793
9CJW_83	Bacteria	Desulfobacterota_B	Binatia	UBA9968				0.142407
9CJW_84	Bacteria	Planctomycetota	Phycisphaerae	Phycisphaerales	SM1A02			0.0931283
9CJW_86	Bacteria	Nitrospirota	Nitrospiria	Nitrospirales	Nitrospiraceae			0.0892681
9CJW_87	Bacteria	Gemmatimonadota	Gemmatimonadetes	KS3-K002	JABDQB01	JAENXO01		0.0573632
9CJW_88	Bacteria	Chloroflexota	Dehalococcoidia	DSTF01	RBG-16-68-14	RBG-16-68-14		0.0525946
9CJW_89	Bacteria	Gemmatimonadota	Gemmatimonadetes	Gemmatimonadales	GWC2-71-9			0.184635
9CJW_9	Bacteria	KSB1	UBA2214	CR04bin15	CR04bin15	N075bin58		0.195944
9CJW_90	Bacteria	Proteobacteria	Gammaproteobacteria	Woeseiales	Woeseiaceae	SZUA-117		0.206192
9CJW_91	Bacteria	Proteobacteria	Alphaproteobacteria	Kiloniellales	J153			0.184675
9CJW_92	Bacteria	Nitrospinota	Nitrospinia	Nitrospinales	Nitrospinaceae			0.133408
9CJW_94	Bacteria	Proteobacteria	Alphaproteobacteria	JAAXGF01	JAAXGF01			0.150309
9DJH_13	Archaea	Thermoproteota	Nitrososphaeria	Nitrososphaerales	Nitrosopumilaceae	JACEMX01		0.398435
9DJH_14	Bacteria	Proteobacteria	Alphaproteobacteria	Kiloniellales	J153	J153		0.355864
9DJH_15	Bacteria	Proteobacteria	Gammaproteobacteria	Woeseiales	Woeseiaceae	UBA1844		0.214587
9DJH_16	Bacteria	Methylomirabilota	Methylomirabilia	Methylomirabilales	CSP1-5	CSP1-5		0.147233
9DJH_18	Bacteria	Acidobacteriota	Acidobacteriae	Acidoferrales	2-02-FULL-67-57			0.380988
9DJH_2	Bacteria	Desulfobacterota_B	Binatia	UBA9968	UBA9968			0.145168
9DJH_21	Bacteria	Gemmatimonadota	Gemmatimonadetes	KS3-K002	JABDQB01			0.161951
9DJH_22	Bacteria	Proteobacteria	Alphaproteobacteria	UBA8366	JADFVY01	JADFVY01		0.151222
9DJH_24	Bacteria	Proteobacteria	Alphaproteobacteria	Rhodospirillales	2-02-FULL-58-16			0.44703
9DJH_4	Archaea	Thermoproteota	Nitrososphaeria	Nitrososphaerales	Nitrosopumilaceae	DRGT01	DRGT01 sp011055585	0.474644
9DJH_6	Archaea	Thermoproteota	Nitrososphaeria	Nitrososphaerales	Nitrosopumilaceae	CSP1-1		0.84222
9DJH_8	Bacteria	Proteobacteria	Gammaproteobacteria	Acidiferrobacterales	SPGG2	SPGG2		0.380538
ROV5_1	Bacteria	Gemmatimonadota	Gemmatimonadetes					0.0914488
ROV5_10	Bacteria	Nitrospirota	Nitrospiria	Nitrospirales	Nitrospiraceae	NS-7		0.0989392
ROV5_101	Bacteria	Proteobacteria	Alphaproteobacteria	Rhodospirillales	Casp-alpha2	Casp-alpha2		0.0530695
ROV5_103	Bacteria	Proteobacteria	Alphaproteobacteria	UBA8366	JADFVY01	JADFVY01		0.110621
ROV5_105	Bacteria	Proteobacteria	Gammaproteobacteria	GCA-001735895	GCA-001735895	GCA-001735895		0.0325095
ROV5_107	Bacteria	Actinobacteriota	Acidimicrobiia	UBA5794	SHLN01			0.0286418
ROV5_108	Bacteria	Actinobacteriota	Acidimicrobiia	UBA5794	SHLN01			0.0647106
ROV5_11	Bacteria	Desulfobacterota_B	Binatia	UBA9968	UBA9968	DP-36		0.0744714
ROV5_12	Bacteria	Proteobacteria	Alphaproteobacteria	MPNO01	MPNO01			0.16703
ROV5_13	Bacteria	Desulfobacterota_D	UBA1144	RKRQ01				0.0534566
ROV5_14	Bacteria	Proteobacteria	Alphaproteobacteria	Rhodospirillales	2-02-FULL-58-16			0.437689
ROV5_15	Bacteria	Nitrospirota	Nitrospiria	Nitrospirales	UBA8639			0.0472026
ROV5_16	Bacteria	Nitrospirota	Nitrospiria	Nitrospirales	UBA8639	UBA8639		0.0775696
ROV5_17	Bacteria	Tectomicrobia	Entotheonellia	Entotheonellales	Entotheonellaceae			0.102826
ROV5_18	Bacteria	Gemmatimonadota	Gemmatimonadetes	KS3-K002	KS3-K002			0.0836552
ROV5_2	Archaea	Thermoproteota	Nitrososphaeria	Nitrososphaerales	Nitrosopumilaceae	DRGT01		0.173198
ROV5_20	Bacteria	Proteobacteria	Gammaproteobacteria	Acidiferrobacterales	Sulfurifustaceae	S146-88		0.0841775
ROV5_21	Bacteria	Proteobacteria	Alphaproteobacteria	Rhizobiales	Afifellaceae			0.203256
ROV5_22	Bacteria	Tectomicrobia						0.0385624
ROV5_23	Bacteria	Proteobacteria	Gammaproteobacteria	Woeseiales	Woeseiaceae	JAACFB01		0.0747283
ROV5_24	Bacteria	Proteobacteria	Gammaproteobacteria	UBA4486				0.0538269
ROV5_25	Bacteria	Desulfobacterota_D	UBA1144	UBA2774	UBA2774	CR02bin9	CR02bin9 sp004356555	0.0858725
ROV5_27	Bacteria	Proteobacteria	Gammaproteobacteria	Woeseiales	Woeseiaceae			0.27143
ROV5_28	Bacteria	Proteobacteria	Alphaproteobacteria	UBA8366	JADFVY01	JADFVY01		0.0743043
ROV5_29	Bacteria	Acidobacteriota	UBA6911	RPQK01				0.235868
ROV5_3	Bacteria	Proteobacteria	Alphaproteobacteria	SMXQ01	SMXQ01			0.177224
ROV5_30	Bacteria	Proteobacteria	Alphaproteobacteria	JAAXGF01	JAAXGF01			0.0786336
ROV5_31	Archaea	Thermoproteota	Nitrososphaeria	Nitrososphaerales	Nitrosopumilaceae			0.150424
ROV5_32	Bacteria	Gemmatimonadota	Gemmatimonadetes	KS3-K002	JABDQB01			0.144898
ROV5_33	Bacteria	Proteobacteria	Gammaproteobacteria	Woeseiales	Woeseiaceae			0.0940724
ROV5_34	Bacteria	Proteobacteria	Gammaproteobacteria	UBA6429	UBA6429			0.034279
ROV5_35	Bacteria	Nitrospirota	Nitrospiria	Nitrospirales				0.0999818
ROV5_37	Bacteria	Proteobacteria	Alphaproteobacteria	Rhizobiales	Methyloligellaceae	MnTg02	MnTg02 sp008974985	0.0683122
ROV5_39	Bacteria	Proteobacteria	Gammaproteobacteria	Acidiferrobacterales	SPGG2	SPGG2		0.316189
ROV5_4	Bacteria	Methylomirabilota	Methylomirabilia	Methylomirabilales	CSP1-5	CSP1-5	CSP1-5 sp012974305	0.103706
ROV5_40	Bacteria	Proteobacteria	Gammaproteobacteria	GCA-001735895	GCA-001735895	GCA-001735895		0.185094
ROV5_43	Bacteria	Nitrospinota	Nitrospinia	Nitrospinales	Nitrospinaceae	SZUA-226		0.138095
ROV5_44	Archaea	Thermoproteota	Nitrososphaeria	Nitrososphaerales	UBA213	UBA213		0.0326213
ROV5_45	Bacteria	Proteobacteria	Alphaproteobacteria	Kiloniellales	J153			0.0842115
ROV5_47	Bacteria	Gemmatimonadota	Gemmatimonadetes	Gemmatimonadales	GWC2-71-9	N074bin45		0.0639478
ROV5_48	Bacteria	Bacteroidota	Ignavibacteria	Ignavibacteriales	Ignavibacteriaceae	BMS3ABIN03		0.0487669
ROV5_50	Bacteria	Proteobacteria	Gammaproteobacteria	Woeseiales	Woeseiaceae			0.121867
ROV5_52	Bacteria	Acidobacteriota	Vicinamibacteria	Bin61	SMYC01			0.0759855
ROV5_53	Bacteria	Acidobacteriota	Acidobacteriae	Acidoferrales	2-02-FULL-67-57			0.299252
ROV5_54	Bacteria	Proteobacteria	Gammaproteobacteria	Woeseiales	Woeseiaceae	SZUA-117		0.311652
ROV5_55	Bacteria	Proteobacteria	Gammaproteobacteria	UBA6522	UBA6522	SMWC01		0.0376611
ROV5_56	Bacteria	Desulfobacterota_D	UBA1144	UBA2774				0.0734328
ROV5_57	Bacteria	Methylomirabilota	Methylomirabilia	Methylomirabilales	CSP1-5	CSP1-5	CSP1-5 sp001643535	0.133276
ROV5_58	Bacteria	Proteobacteria	Gammaproteobacteria	GCA-2729495	GCA-2729495			0.0811449
ROV5_59	Bacteria	Proteobacteria	Alphaproteobacteria	Kiloniellales	J153			0.20695
ROV5_6	Bacteria	Desulfobacterota_B	Binatia	UBA9968	UBA9968			0.180204
ROV5_60	Bacteria	Acidobacteriota	Acidobacteriae	UBA7540				0.0244726
ROV5_62	Bacteria	Chloroflexota	Dehalococcoidia	UBA3495	UBA3495	Casp-Chloro-G3		0.044243
ROV5_63	Bacteria	Nitrospinota	Nitrospinia	Nitrospinales	Nitrospinaceae	SZUA-226		0.20228
ROV5_64	Bacteria	Proteobacteria	Gammaproteobacteria	Burkholderiales	Nitrosomonadaceae	GCA-2721545		0.172849
ROV5_65	Bacteria	Proteobacteria	Gammaproteobacteria	JACDCP01	JACDCP01			0.0206897
ROV5_66	Bacteria	Proteobacteria	Gammaproteobacteria	GCA-001735895	GCA-001735895	GCA-001735895		0.066928
ROV5_67	Bacteria	Desulfobacterota_D	UBA1144	UBA2774				0.076255
ROV5_69	Bacteria	Proteobacteria	Alphaproteobacteria	MPNO01	UBA2964			0.0871521
ROV5_70	Bacteria	Proteobacteria	Gammaproteobacteria	Woeseiales	Woeseiaceae	JAACFB01		0.114147
ROV5_71	Bacteria	Nitrospirota	Nitrospiria	Nitrospirales	UBA8639	SPGG5		0.0476066
ROV5_72	Bacteria	Proteobacteria	Gammaproteobacteria	HK1	HK1	JAABYT01		0.109146
ROV5_73	Archaea	Thermoproteota	Nitrososphaeria	Nitrososphaerales	Nitrosopumilaceae	JACEMX01		0.465502
ROV5_76	Bacteria	Proteobacteria	Alphaproteobacteria	Kiloniellales	J153			0.113808
ROV5_77	Bacteria	Proteobacteria	Gammaproteobacteria	Woeseiales	Woeseiaceae	UBA1844		0.150209
ROV5_79	Bacteria	Chloroflexota	Dehalococcoidia	UBA3495	UBA3495	Casp-Chloro-G3		0.0568893
ROV5_81	Bacteria	Proteobacteria	Gammaproteobacteria	HK1	HK1	JAABYT01		0.124549
ROV5_82	Bacteria	Bacteroidota	Rhodothermia	Rhodothermales	Bin80			0.0747023
ROV5_84	Bacteria	Planctomycetota	Phycisphaerae					0.0205733
ROV5_85	Bacteria	KSB1	UBA2214	CR04bin15	CR04bin15	N075bin58		0.112877
ROV5_86	Bacteria	KSB1	UBA2214	CR04bin15				0.0416237
ROV5_87	Bacteria	Desulfobacterota_B	Binatia	UBA9968				0.157659
ROV5_9	Bacteria	Proteobacteria	Alphaproteobacteria	Rhizobiales	Hyphomicrobiaceae	Hyphomicrobium_A		0.106903
ROV5_91	Archaea	Thermoproteota	Nitrososphaeria	Nitrososphaerales	Nitrosopumilaceae	CSP1-1		0.200986
ROV5_92	Archaea	Thermoproteota	Nitrososphaeria	Nitrososphaerales	Nitrosopumilaceae	DRGT01	DRGT01 sp011055585	0.458691
ROV5_93	Archaea	Thermoproteota	Nitrososphaeria	Nitrososphaerales	Nitrosopumilaceae	CSP1-1		0.0913407
ROV5_94	Bacteria	Proteobacteria	Gammaproteobacteria	Acidiferrobacterales	SPGG2			0.050308
ROV5_99	Bacteria	Bacteroidota	Rhodothermia	Rhodothermales	Bin80			0.142639

## Sheet: S4
Table S4. TCDB's annotation information of MAGs from deep-sea nodule-area sediment samples
MAGs ID	MAG's classificatioin at the phylum level	TCDB family	Function description	Protein name
37A_bin.1	Proteobacteria	2.A.5	The Zinc (Zn2+)-Iron (Fe2+) Permease (ZIP) Family	ZIP
37A_bin.2	Proteobacteria	9.B.10	The Putative Tripartite Zn2+ Transporter (TZT) Family	TZT
37A_bin.2	Proteobacteria	1.A.72	The Mercuric Ion Pore (Mer) Superfamily	Mer
37A_bin.2	Proteobacteria	1.A.72	The Mercuric Ion Pore (Mer) Superfamily	Mer
37A_bin.2	Proteobacteria	9.B.105	The Lead Resistance Fusion Protein (PbrBC) Family	PbrBC
37A_bin.2	Proteobacteria	1.B.76	The Copper Resistance Putative Porin (CopB) Family	CopB
37A_bin.3	Proteobacteria	9.B.10	The Putative Tripartite Zn2+ Transporter (TZT) Family	TZT
37A_bin.3	Proteobacteria	2.A.107	The MntP Mn2+ exporter (MntP) Family	MntP
37A_bin.3	Proteobacteria	1.A.72	The Mercuric Ion Pore (Mer) Superfamily	Mer
37A_bin.3	Proteobacteria	1.A.72	The Mercuric Ion Pore (Mer) Superfamily	Mer
37A_bin.3	Proteobacteria	9.B.105	The Lead Resistance Fusion Protein (PbrBC) Family	PbrBC
37A_bin.3	Proteobacteria	9.A.8	The Ferrous Iron Uptake (FeoB) Family	FeoB
37A_bin.4	KSB1	2.A.5	The Zinc (Zn2+)-Iron (Fe2+) Permease (ZIP) Family	ZIP
37A_bin.4	KSB1	2.A.55	The Metal Ion (Mn2+-iron) Transporter (Nramp) Family	Nramp
37A_bin.4	KSB1	9.B.105	The Lead Resistance Fusion Protein (PbrBC) Family	PbrBC
37A_bin.4	KSB1	9.A.8	The Ferrous Iron Uptake (FeoB) Family	FeoB
37A_bin.5	Desulfobacterota_B	9.B.10	The Putative Tripartite Zn2+ Transporter (TZT) Family	TZT
37A_bin.5	Desulfobacterota_B	9.B.10	The Putative Tripartite Zn2+ Transporter (TZT) Family	TZT
37A_bin.6	Proteobacteria	1.A.72	The Mercuric Ion Pore (Mer) Superfamily	Mer
37A_bin.6	Proteobacteria	1.A.72	The Mercuric Ion Pore (Mer) Superfamily	Mer
37A_bin.6	Proteobacteria	1.A.72	The Mercuric Ion Pore (Mer) Superfamily	Mer
37A_bin.6	Proteobacteria	1.A.72	The Mercuric Ion Pore (Mer) Superfamily	Mer
37A_bin.6	Proteobacteria	1.A.72	The Mercuric Ion Pore (Mer) Superfamily	Mer
37A_bin.6	Proteobacteria	1.A.72	The Mercuric Ion Pore (Mer) Superfamily	Mer
37A_bin.6	Proteobacteria	9.B.105	The Lead Resistance Fusion Protein (PbrBC) Family	PbrBC
37A_bin.7	Nitrospirota	1.A.72	The Mercuric Ion Pore (Mer) Superfamily	Mer
37A_bin.7	Nitrospirota	1.A.72	The Mercuric Ion Pore (Mer) Superfamily	Mer
37A_bin.7	Nitrospirota	9.B.105	The Lead Resistance Fusion Protein (PbrBC) Family	PbrBC
38A_bin.1	Proteobacteria	9.B.10	The Putative Tripartite Zn2+ Transporter (TZT) Family	TZT
38A_bin.1	Proteobacteria	1.A.72	The Mercuric Ion Pore (Mer) Superfamily	Mer
38A_bin.1	Proteobacteria	1.A.72	The Mercuric Ion Pore (Mer) Superfamily	Mer
38A_bin.1	Proteobacteria	9.B.105	The Lead Resistance Fusion Protein (PbrBC) Family	PbrBC
38A_bin.2	Proteobacteria	1.A.72	The Mercuric Ion Pore (Mer) Superfamily	Mer
38A_bin.2	Proteobacteria	1.A.72	The Mercuric Ion Pore (Mer) Superfamily	Mer
38A_bin.2	Proteobacteria	2.A.108	The Iron/Lead Transporter (ILT) Family	ILT
38A_bin.2	Proteobacteria	9.A.8	The Ferrous Iron Uptake (FeoB) Family	FeoB
38A_bin.3	Nitrospirota	1.A.72	The Mercuric Ion Pore (Mer) Superfamily	Mer
38A_bin.3	Nitrospirota	1.A.72	The Mercuric Ion Pore (Mer) Superfamily	Mer
38A_bin.3	Nitrospirota	1.A.72	The Mercuric Ion Pore (Mer) Superfamily	Mer
38A_bin.3	Nitrospirota	1.A.72	The Mercuric Ion Pore (Mer) Superfamily	Mer
38A_bin.3	Nitrospirota	9.B.105	The Lead Resistance Fusion Protein (PbrBC) Family	PbrBC
38A_bin.3	Nitrospirota	9.A.8	The Ferrous Iron Uptake (FeoB) Family	FeoB
38A_bin.4	Proteobacteria	9.B.10	The Putative Tripartite Zn2+ Transporter (TZT) Family	TZT
38A_bin.4	Proteobacteria	1.A.72	The Mercuric Ion Pore (Mer) Superfamily	Mer
38A_bin.4	Proteobacteria	1.A.72	The Mercuric Ion Pore (Mer) Superfamily	Mer
38A_bin.4	Proteobacteria	9.B.105	The Lead Resistance Fusion Protein (PbrBC) Family	PbrBC
38A_bin.4	Proteobacteria	1.B.76	The Copper Resistance Putative Porin (CopB) Family	CopB
38A_bin.5	Proteobacteria	2.A.5	The Zinc (Zn2+)-Iron (Fe2+) Permease (ZIP) Family	ZIP
38A_bin.5	Proteobacteria	9.B.10	The Putative Tripartite Zn2+ Transporter (TZT) Family	TZT
38A_bin.5	Proteobacteria	1.B.76	The Copper Resistance Putative Porin (CopB) Family	CopB
38A_bin.6	Gemmatimonadota	2.A.119	The Organo-Arsenical Exporter (ArsP) Family	ArsP
38A_bin.6	Gemmatimonadota	9.B.62	The Copper Resistance (CopD) Family	CopD
39A_bin.1	Proteobacteria	9.B.10	The Putative Tripartite Zn2+ Transporter (TZT) Family	TZT
39A_bin.1	Proteobacteria	2.A.55	The Metal Ion (Mn2+-iron) Transporter (Nramp) Family	Nramp
39A_bin.1	Proteobacteria	1.A.72	The Mercuric Ion Pore (Mer) Superfamily	Mer
39A_bin.1	Proteobacteria	1.A.72	The Mercuric Ion Pore (Mer) Superfamily	Mer
39A_bin.1	Proteobacteria	1.A.72	The Mercuric Ion Pore (Mer) Superfamily	Mer
39A_bin.1	Proteobacteria	1.A.72	The Mercuric Ion Pore (Mer) Superfamily	Mer
39A_bin.1	Proteobacteria	1.A.72	The Mercuric Ion Pore (Mer) Superfamily	Mer
39A_bin.1	Proteobacteria	1.A.72	The Mercuric Ion Pore (Mer) Superfamily	Mer
39A_bin.1	Proteobacteria	9.B.105	The Lead Resistance Fusion Protein (PbrBC) Family	PbrBC
39A_bin.1	Proteobacteria	1.B.76	The Copper Resistance Putative Porin (CopB) Family	CopB
39A_bin.2	Proteobacteria	2.A.89	The Vacuolar Iron Transporter (VIT) Family	VIT
39A_bin.2	Proteobacteria	9.B.10	The Putative Tripartite Zn2+ Transporter (TZT) Family	TZT
39A_bin.2	Proteobacteria	2.A.107	The MntP Mn2+ exporter (MntP) Family	MntP
39A_bin.2	Proteobacteria	1.A.72	The Mercuric Ion Pore (Mer) Superfamily	Mer
39A_bin.2	Proteobacteria	1.A.72	The Mercuric Ion Pore (Mer) Superfamily	Mer
39A_bin.2	Proteobacteria	1.A.72	The Mercuric Ion Pore (Mer) Superfamily	Mer
39A_bin.2	Proteobacteria	1.A.72	The Mercuric Ion Pore (Mer) Superfamily	Mer
39A_bin.3	Gemmatimonadota	2.A.119	The Organo-Arsenical Exporter (ArsP) Family	ArsP
39A_bin.3	Gemmatimonadota	1.A.72	The Mercuric Ion Pore (Mer) Superfamily	Mer
39A_bin.3	Gemmatimonadota	1.A.72	The Mercuric Ion Pore (Mer) Superfamily	Mer
39A_bin.3	Gemmatimonadota	9.B.62	The Copper Resistance (CopD) Family	CopD
39A_bin.4	Desulfobacterota_B	2.A.89	The Vacuolar Iron Transporter (VIT) Family	VIT
39A_bin.5	Proteobacteria	9.B.10	The Putative Tripartite Zn2+ Transporter (TZT) Family	TZT
39A_bin.5	Proteobacteria	1.A.72	The Mercuric Ion Pore (Mer) Superfamily	Mer
39A_bin.5	Proteobacteria	1.A.72	The Mercuric Ion Pore (Mer) Superfamily	Mer
39A_bin.5	Proteobacteria	9.B.105	The Lead Resistance Fusion Protein (PbrBC) Family	PbrBC
39A_bin.5	Proteobacteria	1.B.76	The Copper Resistance Putative Porin (CopB) Family	CopB
39A_bin.5	Proteobacteria	9.B.62	The Copper Resistance (CopD) Family	CopD
39A_bin.6	Nitrospirota	1.A.72	The Mercuric Ion Pore (Mer) Superfamily	Mer
39A_bin.6	Nitrospirota	1.A.72	The Mercuric Ion Pore (Mer) Superfamily	Mer
39A_bin.6	Nitrospirota	9.B.105	The Lead Resistance Fusion Protein (PbrBC) Family	PbrBC
39A_bin.6	Nitrospirota	9.A.8	The Ferrous Iron Uptake (FeoB) Family	FeoB
39A_bin.7	Proteobacteria	2.A.5	The Zinc (Zn2+)-Iron (Fe2+) Permease (ZIP) Family	ZIP
39A_bin.7	Proteobacteria	9.B.10	The Putative Tripartite Zn2+ Transporter (TZT) Family	TZT
39A_bin.7	Proteobacteria	9.B.105	The Lead Resistance Fusion Protein (PbrBC) Family	PbrBC
39A_bin.7	Proteobacteria	9.A.8	The Ferrous Iron Uptake (FeoB) Family	FeoB
39A_bin.7	Proteobacteria	1.B.76	The Copper Resistance Putative Porin (CopB) Family	CopB
39A_bin.7	Proteobacteria	9.B.62	The Copper Resistance (CopD) Family	CopD
39A_bin.8	Proteobacteria	9.B.10	The Putative Tripartite Zn2+ Transporter (TZT) Family	TZT
39A_bin.8	Proteobacteria	9.B.10	The Putative Tripartite Zn2+ Transporter (TZT) Family	TZT
39A_bin.8	Proteobacteria	1.A.72	The Mercuric Ion Pore (Mer) Superfamily	Mer
39A_bin.8	Proteobacteria	1.A.72	The Mercuric Ion Pore (Mer) Superfamily	Mer
39A_bin.8	Proteobacteria	9.A.8	The Ferrous Iron Uptake (FeoB) Family	FeoB
39A_bin.8	Proteobacteria	9.B.62	The Copper Resistance (CopD) Family	CopD
40A_bin.1	Proteobacteria	9.B.10	The Putative Tripartite Zn2+ Transporter (TZT) Family	TZT
40A_bin.1	Proteobacteria	1.A.72	The Mercuric Ion Pore (Mer) Superfamily	Mer
40A_bin.1	Proteobacteria	1.A.72	The Mercuric Ion Pore (Mer) Superfamily	Mer
40A_bin.1	Proteobacteria	9.B.105	The Lead Resistance Fusion Protein (PbrBC) Family	PbrBC
40A_bin.1	Proteobacteria	9.A.8	The Ferrous Iron Uptake (FeoB) Family	FeoB
40A_bin.2	Nitrospinota	2.A.108	The Iron/Lead Transporter (ILT) Family	ILT
40A_bin.3	Proteobacteria	2.A.5	The Zinc (Zn2+)-Iron (Fe2+) Permease (ZIP) Family	ZIP
40A_bin.3	Proteobacteria	9.B.10	The Putative Tripartite Zn2+ Transporter (TZT) Family	TZT
40A_bin.4	Gemmatimonadota	2.A.119	The Organo-Arsenical Exporter (ArsP) Family	ArsP
40A_bin.4	Gemmatimonadota	2.A.119	The Organo-Arsenical Exporter (ArsP) Family	ArsP
40A_bin.4	Gemmatimonadota	1.B.76	The Copper Resistance Putative Porin (CopB) Family	CopB
40A_bin.4	Gemmatimonadota	9.B.62	The Copper Resistance (CopD) Family	CopD
40A_bin.4	Gemmatimonadota	9.B.62	The Copper Resistance (CopD) Family	CopD
40A_bin.5	Proteobacteria	9.B.10	The Putative Tripartite Zn2+ Transporter (TZT) Family	TZT
40A_bin.5	Proteobacteria	1.A.72	The Mercuric Ion Pore (Mer) Superfamily	Mer
40A_bin.5	Proteobacteria	1.A.72	The Mercuric Ion Pore (Mer) Superfamily	Mer
40A_bin.5	Proteobacteria	9.B.105	The Lead Resistance Fusion Protein (PbrBC) Family	PbrBC
40A_bin.6	Proteobacteria	2.A.89	The Vacuolar Iron Transporter (VIT) Family	VIT
40A_bin.6	Proteobacteria	9.B.10	The Putative Tripartite Zn2+ Transporter (TZT) Family	TZT
40A_bin.6	Proteobacteria	1.A.72	The Mercuric Ion Pore (Mer) Superfamily	Mer
40A_bin.6	Proteobacteria	1.A.72	The Mercuric Ion Pore (Mer) Superfamily	Mer
40A_bin.6	Proteobacteria	9.A.8	The Ferrous Iron Uptake (FeoB) Family	FeoB
40A_bin.7	Proteobacteria	2.A.5	The Zinc (Zn2+)-Iron (Fe2+) Permease (ZIP) Family	ZIP
40A_bin.7	Proteobacteria	9.B.10	The Putative Tripartite Zn2+ Transporter (TZT) Family	TZT
40A_bin.7	Proteobacteria	9.B.10	The Putative Tripartite Zn2+ Transporter (TZT) Family	TZT
40A_bin.7	Proteobacteria	9.B.10	The Putative Tripartite Zn2+ Transporter (TZT) Family	TZT
40A_bin.7	Proteobacteria	9.B.62	The Copper Resistance (CopD) Family	CopD
41A_bin.1	Proteobacteria	9.B.105	The Lead Resistance Fusion Protein (PbrBC) Family	PbrBC
41A_bin.1	Proteobacteria	9.A.8	The Ferrous Iron Uptake (FeoB) Family	FeoB
41A_bin.2	Desulfobacterota_B	2.A.5	The Zinc (Zn2+)-Iron (Fe2+) Permease (ZIP) Family	ZIP
41A_bin.2	Desulfobacterota_B	2.A.89	The Vacuolar Iron Transporter (VIT) Family	VIT
41A_bin.2	Desulfobacterota_B	9.B.10	The Putative Tripartite Zn2+ Transporter (TZT) Family	TZT
41A_bin.2	Desulfobacterota_B	9.B.105	The Lead Resistance Fusion Protein (PbrBC) Family	PbrBC
41A_bin.3	Proteobacteria	2.A.5	The Zinc (Zn2+)-Iron (Fe2+) Permease (ZIP) Family	ZIP
41A_bin.3	Proteobacteria	9.B.10	The Putative Tripartite Zn2+ Transporter (TZT) Family	TZT
41A_bin.4	Nitrospirota	9.B.62	The Copper Resistance (CopD) Family	CopD
41A_bin.5	Proteobacteria	9.B.105	The Lead Resistance Fusion Protein (PbrBC) Family	PbrBC
41A_bin.5	Proteobacteria	9.A.8	The Ferrous Iron Uptake (FeoB) Family	FeoB
41A_bin.6	Proteobacteria	1.A.72	The Mercuric Ion Pore (Mer) Superfamily	Mer
41A_bin.6	Proteobacteria	1.A.72	The Mercuric Ion Pore (Mer) Superfamily	Mer
41A_bin.6	Proteobacteria	1.A.72	The Mercuric Ion Pore (Mer) Superfamily	Mer
41A_bin.6	Proteobacteria	1.A.72	The Mercuric Ion Pore (Mer) Superfamily	Mer
41A_bin.6	Proteobacteria	1.A.72	The Mercuric Ion Pore (Mer) Superfamily	Mer
41A_bin.6	Proteobacteria	1.A.72	The Mercuric Ion Pore (Mer) Superfamily	Mer
41A_bin.6	Proteobacteria	2.A.108	The Iron/Lead Transporter (ILT) Family	ILT
41A_bin.6	Proteobacteria	9.A.8	The Ferrous Iron Uptake (FeoB) Family	FeoB
41A_bin.7	KSB1	2.A.5	The Zinc (Zn2+)-Iron (Fe2+) Permease (ZIP) Family	ZIP
41A_bin.7	KSB1	2.A.55	The Metal Ion (Mn2+-iron) Transporter (Nramp) Family	Nramp
41A_bin.7	KSB1	9.B.105	The Lead Resistance Fusion Protein (PbrBC) Family	PbrBC
41A_bin.7	KSB1	9.B.105	The Lead Resistance Fusion Protein (PbrBC) Family	PbrBC
41A_bin.7	KSB1	2.A.108	The Iron/Lead Transporter (ILT) Family	ILT
41A_bin.7	KSB1	9.A.8	The Ferrous Iron Uptake (FeoB) Family	FeoB
41A_bin.8	Proteobacteria	9.B.10	The Putative Tripartite Zn2+ Transporter (TZT) Family	TZT
41A_bin.8	Proteobacteria	1.A.72	The Mercuric Ion Pore (Mer) Superfamily	Mer
41A_bin.8	Proteobacteria	1.A.72	The Mercuric Ion Pore (Mer) Superfamily	Mer
41A_bin.8	Proteobacteria	1.A.72	The Mercuric Ion Pore (Mer) Superfamily	Mer
41A_bin.8	Proteobacteria	1.A.72	The Mercuric Ion Pore (Mer) Superfamily	Mer
41A_bin.8	Proteobacteria	9.B.105	The Lead Resistance Fusion Protein (PbrBC) Family	PbrBC
41A_bin.9	Proteobacteria	9.B.10	The Putative Tripartite Zn2+ Transporter (TZT) Family	TZT
41A_bin.9	Proteobacteria	9.A.8	The Ferrous Iron Uptake (FeoB) Family	FeoB
42A_bin.1	Nitrospinota	2.A.5	The Zinc (Zn2+)-Iron (Fe2+) Permease (ZIP) Family	ZIP
42A_bin.1	Nitrospinota	1.A.72	The Mercuric Ion Pore (Mer) Superfamily	Mer
42A_bin.1	Nitrospinota	1.A.72	The Mercuric Ion Pore (Mer) Superfamily	Mer
42A_bin.1	Nitrospinota	1.A.72	The Mercuric Ion Pore (Mer) Superfamily	Mer
42A_bin.1	Nitrospinota	1.A.72	The Mercuric Ion Pore (Mer) Superfamily	Mer
42A_bin.1	Nitrospinota	2.A.108	The Iron/Lead Transporter (ILT) Family	ILT
42A_bin.3	Proteobacteria	9.B.10	The Putative Tripartite Zn2+ Transporter (TZT) Family	TZT
42A_bin.3	Proteobacteria	1.A.72	The Mercuric Ion Pore (Mer) Superfamily	Mer
42A_bin.3	Proteobacteria	1.A.72	The Mercuric Ion Pore (Mer) Superfamily	Mer
42A_bin.3	Proteobacteria	9.B.105	The Lead Resistance Fusion Protein (PbrBC) Family	PbrBC
42A_bin.4	Nitrospirota	9.A.8	The Ferrous Iron Uptake (FeoB) Family	FeoB
42A_bin.5	Proteobacteria	1.A.72	The Mercuric Ion Pore (Mer) Superfamily	Mer
42A_bin.5	Proteobacteria	1.A.72	The Mercuric Ion Pore (Mer) Superfamily	Mer
42A_bin.5	Proteobacteria	1.A.72	The Mercuric Ion Pore (Mer) Superfamily	Mer
42A_bin.5	Proteobacteria	1.A.72	The Mercuric Ion Pore (Mer) Superfamily	Mer
42A_bin.5	Proteobacteria	1.A.72	The Mercuric Ion Pore (Mer) Superfamily	Mer
42A_bin.5	Proteobacteria	1.A.72	The Mercuric Ion Pore (Mer) Superfamily	Mer
42A_bin.5	Proteobacteria	9.B.105	The Lead Resistance Fusion Protein (PbrBC) Family	PbrBC
42A_bin.5	Proteobacteria	9.A.8	The Ferrous Iron Uptake (FeoB) Family	FeoB
42A_bin.6	Proteobacteria	1.A.72	The Mercuric Ion Pore (Mer) Superfamily	Mer
42A_bin.6	Proteobacteria	1.A.72	The Mercuric Ion Pore (Mer) Superfamily	Mer
42A_bin.6	Proteobacteria	1.A.72	The Mercuric Ion Pore (Mer) Superfamily	Mer
42A_bin.6	Proteobacteria	1.A.72	The Mercuric Ion Pore (Mer) Superfamily	Mer
42A_bin.6	Proteobacteria	9.B.105	The Lead Resistance Fusion Protein (PbrBC) Family	PbrBC
42A_bin.6	Proteobacteria	2.A.108	The Iron/Lead Transporter (ILT) Family	ILT
42A_bin.6	Proteobacteria	9.A.8	The Ferrous Iron Uptake (FeoB) Family	FeoB
42A_bin.7	Proteobacteria	2.A.89	The Vacuolar Iron Transporter (VIT) Family	VIT
42A_bin.7	Proteobacteria	9.B.10	The Putative Tripartite Zn2+ Transporter (TZT) Family	TZT
42A_bin.8	Methylomirabilota	2.A.5	The Zinc (Zn2+)-Iron (Fe2+) Permease (ZIP) Family	ZIP
42A_bin.8	Methylomirabilota	2.A.5	The Zinc (Zn2+)-Iron (Fe2+) Permease (ZIP) Family	ZIP
42A_bin.8	Methylomirabilota	2.A.55	The Metal Ion (Mn2+-iron) Transporter (Nramp) Family	Nramp
42A_bin.8	Methylomirabilota	1.A.72	The Mercuric Ion Pore (Mer) Superfamily	Mer
42A_bin.8	Methylomirabilota	1.A.72	The Mercuric Ion Pore (Mer) Superfamily	Mer
42A_bin.8	Methylomirabilota	2.A.108	The Iron/Lead Transporter (ILT) Family	ILT
42A_bin.8	Methylomirabilota	9.A.8	The Ferrous Iron Uptake (FeoB) Family	FeoB
42A_bin.8	Methylomirabilota	1.B.76	The Copper Resistance Putative Porin (CopB) Family	CopB
42A_bin.8	Methylomirabilota	1.B.76	The Copper Resistance Putative Porin (CopB) Family	CopB
42A_bin.9	Proteobacteria	9.B.10	The Putative Tripartite Zn2+ Transporter (TZT) Family	TZT
42A_bin.9	Proteobacteria	9.B.10	The Putative Tripartite Zn2+ Transporter (TZT) Family	TZT
42A_bin.9	Proteobacteria	1.A.72	The Mercuric Ion Pore (Mer) Superfamily	Mer
42A_bin.9	Proteobacteria	1.A.72	The Mercuric Ion Pore (Mer) Superfamily	Mer
42A_bin.9	Proteobacteria	1.A.72	The Mercuric Ion Pore (Mer) Superfamily	Mer
42A_bin.9	Proteobacteria	1.A.72	The Mercuric Ion Pore (Mer) Superfamily	Mer
42A_bin.9	Proteobacteria	9.B.105	The Lead Resistance Fusion Protein (PbrBC) Family	PbrBC
43A_bin.1	Proteobacteria	9.B.10	The Putative Tripartite Zn2+ Transporter (TZT) Family	TZT
43A_bin.1	Proteobacteria	1.A.72	The Mercuric Ion Pore (Mer) Superfamily	Mer
43A_bin.1	Proteobacteria	1.A.72	The Mercuric Ion Pore (Mer) Superfamily	Mer
43A_bin.1	Proteobacteria	9.B.105	The Lead Resistance Fusion Protein (PbrBC) Family	PbrBC
43A_bin.10	Proteobacteria	2.A.89	The Vacuolar Iron Transporter (VIT) Family	VIT
43A_bin.10	Proteobacteria	9.B.10	The Putative Tripartite Zn2+ Transporter (TZT) Family	TZT
43A_bin.10	Proteobacteria	1.A.72	The Mercuric Ion Pore (Mer) Superfamily	Mer
43A_bin.10	Proteobacteria	1.A.72	The Mercuric Ion Pore (Mer) Superfamily	Mer
43A_bin.10	Proteobacteria	9.B.105	The Lead Resistance Fusion Protein (PbrBC) Family	PbrBC
43A_bin.11	Proteobacteria	2.A.5	The Zinc (Zn2+)-Iron (Fe2+) Permease (ZIP) Family	ZIP
43A_bin.11	Proteobacteria	9.B.10	The Putative Tripartite Zn2+ Transporter (TZT) Family	TZT
43A_bin.2	Nitrospirota	9.B.105	The Lead Resistance Fusion Protein (PbrBC) Family	PbrBC
43A_bin.2	Nitrospirota	9.B.62	The Copper Resistance (CopD) Family	CopD
43A_bin.3	Proteobacteria	1.A.72	The Mercuric Ion Pore (Mer) Superfamily	Mer
43A_bin.3	Proteobacteria	1.A.72	The Mercuric Ion Pore (Mer) Superfamily	Mer
43A_bin.3	Proteobacteria	9.B.105	The Lead Resistance Fusion Protein (PbrBC) Family	PbrBC
43A_bin.3	Proteobacteria	2.A.108	The Iron/Lead Transporter (ILT) Family	ILT
43A_bin.3	Proteobacteria	9.A.8	The Ferrous Iron Uptake (FeoB) Family	FeoB
43A_bin.4	Proteobacteria	2.A.55	The Metal Ion (Mn2+-iron) Transporter (Nramp) Family	Nramp
43A_bin.4	Proteobacteria	9.A.8	The Ferrous Iron Uptake (FeoB) Family	FeoB
43A_bin.4	Proteobacteria	9.B.62	The Copper Resistance (CopD) Family	CopD
43A_bin.5	Proteobacteria	2.A.5	The Zinc (Zn2+)-Iron (Fe2+) Permease (ZIP) Family	ZIP
43A_bin.5	Proteobacteria	9.B.105	The Lead Resistance Fusion Protein (PbrBC) Family	PbrBC
43A_bin.5	Proteobacteria	1.B.76	The Copper Resistance Putative Porin (CopB) Family	CopB
43A_bin.5	Proteobacteria	9.B.62	The Copper Resistance (CopD) Family	CopD
43A_bin.6	Proteobacteria	9.B.10	The Putative Tripartite Zn2+ Transporter (TZT) Family	TZT
43A_bin.6	Proteobacteria	1.A.72	The Mercuric Ion Pore (Mer) Superfamily	Mer
43A_bin.6	Proteobacteria	1.A.72	The Mercuric Ion Pore (Mer) Superfamily	Mer
43A_bin.6	Proteobacteria	1.A.72	The Mercuric Ion Pore (Mer) Superfamily	Mer
43A_bin.6	Proteobacteria	1.A.72	The Mercuric Ion Pore (Mer) Superfamily	Mer
43A_bin.6	Proteobacteria	9.B.105	The Lead Resistance Fusion Protein (PbrBC) Family	PbrBC
43A_bin.7	Unclassified	2.A.89	The Vacuolar Iron Transporter (VIT) Family	VIT
43A_bin.8	Actinobacteriota	2.A.89	The Vacuolar Iron Transporter (VIT) Family	VIT
43A_bin.8	Actinobacteriota	9.B.105	The Lead Resistance Fusion Protein (PbrBC) Family	PbrBC
43A_bin.8	Actinobacteriota	9.A.8	The Ferrous Iron Uptake (FeoB) Family	FeoB
43A_bin.8	Actinobacteriota	3.A.4	The Arsenite-Antimonite (ArsAB) Efflux Family	ArsB
43A_bin.8	Actinobacteriota	2.A.59	The Arsenical Resistance-3 (ACR3) Family	ACR3
43A_bin.9	KSB1	2.A.5	The Zinc (Zn2+)-Iron (Fe2+) Permease (ZIP) Family	ZIP
43A_bin.9	KSB1	2.A.55	The Metal Ion (Mn2+-iron) Transporter (Nramp) Family	Nramp
43A_bin.9	KSB1	9.B.105	The Lead Resistance Fusion Protein (PbrBC) Family	PbrBC
43A_bin.9	KSB1	9.A.8	The Ferrous Iron Uptake (FeoB) Family	FeoB
44A_bin.1	Proteobacteria	9.B.10	The Putative Tripartite Zn2+ Transporter (TZT) Family	TZT
44A_bin.1	Proteobacteria	9.B.10	The Putative Tripartite Zn2+ Transporter (TZT) Family	TZT
44A_bin.1	Proteobacteria	1.A.72	The Mercuric Ion Pore (Mer) Superfamily	Mer
44A_bin.1	Proteobacteria	1.A.72	The Mercuric Ion Pore (Mer) Superfamily	Mer
44A_bin.1	Proteobacteria	9.B.105	The Lead Resistance Fusion Protein (PbrBC) Family	PbrBC
44A_bin.10	Proteobacteria	9.B.10	The Putative Tripartite Zn2+ Transporter (TZT) Family	TZT
44A_bin.10	Proteobacteria	9.A.8	The Ferrous Iron Uptake (FeoB) Family	FeoB
44A_bin.11	Proteobacteria	9.B.10	The Putative Tripartite Zn2+ Transporter (TZT) Family	TZT
44A_bin.11	Proteobacteria	1.A.72	The Mercuric Ion Pore (Mer) Superfamily	Mer
44A_bin.11	Proteobacteria	1.A.72	The Mercuric Ion Pore (Mer) Superfamily	Mer
44A_bin.11	Proteobacteria	1.A.72	The Mercuric Ion Pore (Mer) Superfamily	Mer
44A_bin.11	Proteobacteria	1.A.72	The Mercuric Ion Pore (Mer) Superfamily	Mer
44A_bin.11	Proteobacteria	9.B.105	The Lead Resistance Fusion Protein (PbrBC) Family	PbrBC
44A_bin.13	Proteobacteria	1.A.72	The Mercuric Ion Pore (Mer) Superfamily	Mer
44A_bin.13	Proteobacteria	1.A.72	The Mercuric Ion Pore (Mer) Superfamily	Mer
44A_bin.13	Proteobacteria	1.A.72	The Mercuric Ion Pore (Mer) Superfamily	Mer
44A_bin.13	Proteobacteria	1.A.72	The Mercuric Ion Pore (Mer) Superfamily	Mer
44A_bin.13	Proteobacteria	1.A.72	The Mercuric Ion Pore (Mer) Superfamily	Mer
44A_bin.13	Proteobacteria	1.A.72	The Mercuric Ion Pore (Mer) Superfamily	Mer
44A_bin.13	Proteobacteria	9.B.105	The Lead Resistance Fusion Protein (PbrBC) Family	PbrBC
44A_bin.2	Proteobacteria	2.A.5	The Zinc (Zn2+)-Iron (Fe2+) Permease (ZIP) Family	ZIP
44A_bin.3	Methylomirabilota	2.A.5	The Zinc (Zn2+)-Iron (Fe2+) Permease (ZIP) Family	ZIP
44A_bin.3	Methylomirabilota	2.A.55	The Metal Ion (Mn2+-iron) Transporter (Nramp) Family	Nramp
44A_bin.3	Methylomirabilota	1.A.72	The Mercuric Ion Pore (Mer) Superfamily	Mer
44A_bin.3	Methylomirabilota	1.A.72	The Mercuric Ion Pore (Mer) Superfamily	Mer
44A_bin.3	Methylomirabilota	2.A.108	The Iron/Lead Transporter (ILT) Family	ILT
44A_bin.3	Methylomirabilota	9.A.8	The Ferrous Iron Uptake (FeoB) Family	FeoB
44A_bin.3	Methylomirabilota	1.B.76	The Copper Resistance Putative Porin (CopB) Family	CopB
44A_bin.4	Proteobacteria	1.A.72	The Mercuric Ion Pore (Mer) Superfamily	Mer
44A_bin.4	Proteobacteria	1.A.72	The Mercuric Ion Pore (Mer) Superfamily	Mer
44A_bin.4	Proteobacteria	9.B.105	The Lead Resistance Fusion Protein (PbrBC) Family	PbrBC
44A_bin.4	Proteobacteria	2.A.108	The Iron/Lead Transporter (ILT) Family	ILT
44A_bin.4	Proteobacteria	9.A.8	The Ferrous Iron Uptake (FeoB) Family	FeoB
44A_bin.5	Desulfobacterota_B	2.A.89	The Vacuolar Iron Transporter (VIT) Family	VIT
44A_bin.5	Desulfobacterota_B	9.B.10	The Putative Tripartite Zn2+ Transporter (TZT) Family	TZT
44A_bin.5	Desulfobacterota_B	2.A.108	The Iron/Lead Transporter (ILT) Family	ILT
44A_bin.6	Nitrospinota	2.A.5	The Zinc (Zn2+)-Iron (Fe2+) Permease (ZIP) Family	ZIP
44A_bin.6	Nitrospinota	2.A.108	The Iron/Lead Transporter (ILT) Family	ILT
44A_bin.7	KSB1	2.A.5	The Zinc (Zn2+)-Iron (Fe2+) Permease (ZIP) Family	ZIP
44A_bin.7	KSB1	9.B.105	The Lead Resistance Fusion Protein (PbrBC) Family	PbrBC
44A_bin.7	KSB1	9.A.8	The Ferrous Iron Uptake (FeoB) Family	FeoB
44A_bin.8	Proteobacteria	9.B.62	The Copper Resistance (CopD) Family	CopD
44A_bin.9	Gemmatimonadota	1.A.72	The Mercuric Ion Pore (Mer) Superfamily	Mer
44A_bin.9	Gemmatimonadota	1.A.72	The Mercuric Ion Pore (Mer) Superfamily	Mer
45A_bin.1	Proteobacteria	9.B.10	The Putative Tripartite Zn2+ Transporter (TZT) Family	TZT
45A_bin.10	Proteobacteria	1.A.72	The Mercuric Ion Pore (Mer) Superfamily	Mer
45A_bin.10	Proteobacteria	1.A.72	The Mercuric Ion Pore (Mer) Superfamily	Mer
45A_bin.10	Proteobacteria	9.B.105	The Lead Resistance Fusion Protein (PbrBC) Family	PbrBC
45A_bin.10	Proteobacteria	2.A.108	The Iron/Lead Transporter (ILT) Family	ILT
45A_bin.10	Proteobacteria	9.A.8	The Ferrous Iron Uptake (FeoB) Family	FeoB
45A_bin.11	Methylomirabilota	2.A.55	The Metal Ion (Mn2+-iron) Transporter (Nramp) Family	Nramp
45A_bin.11	Methylomirabilota	2.A.108	The Iron/Lead Transporter (ILT) Family	ILT
45A_bin.12	Gemmatimonadota	2.A.119	The Organo-Arsenical Exporter (ArsP) Family	ArsP
45A_bin.12	Gemmatimonadota	9.B.62	The Copper Resistance (CopD) Family	CopD
45A_bin.13	Proteobacteria	9.B.10	The Putative Tripartite Zn2+ Transporter (TZT) Family	TZT
45A_bin.13	Proteobacteria	9.A.8	The Ferrous Iron Uptake (FeoB) Family	FeoB
45A_bin.2	Proteobacteria	9.B.10	The Putative Tripartite Zn2+ Transporter (TZT) Family	TZT
45A_bin.2	Proteobacteria	1.A.72	The Mercuric Ion Pore (Mer) Superfamily	Mer
45A_bin.2	Proteobacteria	1.A.72	The Mercuric Ion Pore (Mer) Superfamily	Mer
45A_bin.2	Proteobacteria	1.A.72	The Mercuric Ion Pore (Mer) Superfamily	Mer
45A_bin.2	Proteobacteria	1.A.72	The Mercuric Ion Pore (Mer) Superfamily	Mer
45A_bin.2	Proteobacteria	1.A.72	The Mercuric Ion Pore (Mer) Superfamily	Mer
45A_bin.2	Proteobacteria	1.A.72	The Mercuric Ion Pore (Mer) Superfamily	Mer
45A_bin.2	Proteobacteria	1.A.72	The Mercuric Ion Pore (Mer) Superfamily	Mer
45A_bin.2	Proteobacteria	1.A.72	The Mercuric Ion Pore (Mer) Superfamily	Mer
45A_bin.2	Proteobacteria	9.B.105	The Lead Resistance Fusion Protein (PbrBC) Family	PbrBC
45A_bin.3	Proteobacteria	2.A.89	The Vacuolar Iron Transporter (VIT) Family	VIT
45A_bin.3	Proteobacteria	9.B.10	The Putative Tripartite Zn2+ Transporter (TZT) Family	TZT
45A_bin.3	Proteobacteria	1.A.72	The Mercuric Ion Pore (Mer) Superfamily	Mer
45A_bin.3	Proteobacteria	1.A.72	The Mercuric Ion Pore (Mer) Superfamily	Mer
45A_bin.3	Proteobacteria	1.A.72	The Mercuric Ion Pore (Mer) Superfamily	Mer
45A_bin.3	Proteobacteria	1.A.72	The Mercuric Ion Pore (Mer) Superfamily	Mer
45A_bin.3	Proteobacteria	9.A.8	The Ferrous Iron Uptake (FeoB) Family	FeoB
45A_bin.4	Methylomirabilota	2.A.5	The Zinc (Zn2+)-Iron (Fe2+) Permease (ZIP) Family	ZIP
45A_bin.4	Methylomirabilota	2.A.55	The Metal Ion (Mn2+-iron) Transporter (Nramp) Family	Nramp
45A_bin.4	Methylomirabilota	9.A.8	The Ferrous Iron Uptake (FeoB) Family	FeoB
45A_bin.4	Methylomirabilota	1.B.76	The Copper Resistance Putative Porin (CopB) Family	CopB
45A_bin.5	Proteobacteria	2.A.5	The Zinc (Zn2+)-Iron (Fe2+) Permease (ZIP) Family	ZIP
45A_bin.6	Acidobacteriota	2.A.5	The Zinc (Zn2+)-Iron (Fe2+) Permease (ZIP) Family	ZIP
45A_bin.6	Acidobacteriota	9.B.105	The Lead Resistance Fusion Protein (PbrBC) Family	PbrBC
45A_bin.6	Acidobacteriota	9.A.8	The Ferrous Iron Uptake (FeoB) Family	FeoB
45A_bin.7	Nitrospirota	1.A.72	The Mercuric Ion Pore (Mer) Superfamily	Mer
45A_bin.7	Nitrospirota	1.A.72	The Mercuric Ion Pore (Mer) Superfamily	Mer
45A_bin.7	Nitrospirota	9.B.105	The Lead Resistance Fusion Protein (PbrBC) Family	PbrBC
45A_bin.7	Nitrospirota	9.A.8	The Ferrous Iron Uptake (FeoB) Family	FeoB
45A_bin.8	Proteobacteria	9.B.10	The Putative Tripartite Zn2+ Transporter (TZT) Family	TZT
45A_bin.8	Proteobacteria	1.A.72	The Mercuric Ion Pore (Mer) Superfamily	Mer
45A_bin.8	Proteobacteria	1.A.72	The Mercuric Ion Pore (Mer) Superfamily	Mer
45A_bin.8	Proteobacteria	1.A.72	The Mercuric Ion Pore (Mer) Superfamily	Mer
45A_bin.8	Proteobacteria	1.A.72	The Mercuric Ion Pore (Mer) Superfamily	Mer
45A_bin.8	Proteobacteria	9.B.105	The Lead Resistance Fusion Protein (PbrBC) Family	PbrBC
45A_bin.9	Proteobacteria	9.B.10	The Putative Tripartite Zn2+ Transporter (TZT) Family	TZT
45A_bin.9	Proteobacteria	2.A.55	The Metal Ion (Mn2+-iron) Transporter (Nramp) Family	Nramp
45A_bin.9	Proteobacteria	9.A.8	The Ferrous Iron Uptake (FeoB) Family	FeoB
45A_bin.9	Proteobacteria	1.B.76	The Copper Resistance Putative Porin (CopB) Family	CopB
45A_bin.9	Proteobacteria	9.B.62	The Copper Resistance (CopD) Family	CopD
46A_bin.1	Proteobacteria	9.B.10	The Putative Tripartite Zn2+ Transporter (TZT) Family	TZT
46A_bin.1	Proteobacteria	1.A.72	The Mercuric Ion Pore (Mer) Superfamily	Mer
46A_bin.1	Proteobacteria	1.A.72	The Mercuric Ion Pore (Mer) Superfamily	Mer
46A_bin.1	Proteobacteria	1.A.72	The Mercuric Ion Pore (Mer) Superfamily	Mer
46A_bin.1	Proteobacteria	1.A.72	The Mercuric Ion Pore (Mer) Superfamily	Mer
46A_bin.1	Proteobacteria	1.A.72	The Mercuric Ion Pore (Mer) Superfamily	Mer
46A_bin.1	Proteobacteria	1.A.72	The Mercuric Ion Pore (Mer) Superfamily	Mer
46A_bin.1	Proteobacteria	9.B.105	The Lead Resistance Fusion Protein (PbrBC) Family	PbrBC
46A_bin.2	Methylomirabilota	2.A.55	The Metal Ion (Mn2+-iron) Transporter (Nramp) Family	Nramp
46A_bin.2	Methylomirabilota	2.A.108	The Iron/Lead Transporter (ILT) Family	ILT
46A_bin.3	Proteobacteria	2.A.55	The Metal Ion (Mn2+-iron) Transporter (Nramp) Family	Nramp
46A_bin.3	Proteobacteria	9.A.8	The Ferrous Iron Uptake (FeoB) Family	FeoB
46A_bin.3	Proteobacteria	9.B.62	The Copper Resistance (CopD) Family	CopD
46A_bin.4	Proteobacteria	1.A.72	The Mercuric Ion Pore (Mer) Superfamily	Mer
46A_bin.4	Proteobacteria	1.A.72	The Mercuric Ion Pore (Mer) Superfamily	Mer
46A_bin.4	Proteobacteria	1.A.72	The Mercuric Ion Pore (Mer) Superfamily	Mer
46A_bin.4	Proteobacteria	1.A.72	The Mercuric Ion Pore (Mer) Superfamily	Mer
46A_bin.4	Proteobacteria	1.A.72	The Mercuric Ion Pore (Mer) Superfamily	Mer
46A_bin.4	Proteobacteria	1.A.72	The Mercuric Ion Pore (Mer) Superfamily	Mer
46A_bin.4	Proteobacteria	9.B.105	The Lead Resistance Fusion Protein (PbrBC) Family	PbrBC
46A_bin.4	Proteobacteria	9.A.8	The Ferrous Iron Uptake (FeoB) Family	FeoB
46A_bin.5	Nitrospirota	2.A.5	The Zinc (Zn2+)-Iron (Fe2+) Permease (ZIP) Family	ZIP
46A_bin.5	Nitrospirota	1.A.72	The Mercuric Ion Pore (Mer) Superfamily	Mer
46A_bin.5	Nitrospirota	1.A.72	The Mercuric Ion Pore (Mer) Superfamily	Mer
46A_bin.6	Proteobacteria	2.A.5	The Zinc (Zn2+)-Iron (Fe2+) Permease (ZIP) Family	ZIP
46A_bin.6	Proteobacteria	9.B.10	The Putative Tripartite Zn2+ Transporter (TZT) Family	TZT
46A_bin.6	Proteobacteria	1.B.76	The Copper Resistance Putative Porin (CopB) Family	CopB
46A_bin.6	Proteobacteria	9.B.62	The Copper Resistance (CopD) Family	CopD
46A_bin.6	Proteobacteria	2.A.45	The Arsenite-Antimonite (ArsB) Efflux Family	ArsB
46A_bin.7	Proteobacteria	9.B.10	The Putative Tripartite Zn2+ Transporter (TZT) Family	TZT
46A_bin.7	Proteobacteria	1.A.72	The Mercuric Ion Pore (Mer) Superfamily	Mer
46A_bin.7	Proteobacteria	1.A.72	The Mercuric Ion Pore (Mer) Superfamily	Mer
46A_bin.7	Proteobacteria	1.A.72	The Mercuric Ion Pore (Mer) Superfamily	Mer
46A_bin.7	Proteobacteria	1.A.72	The Mercuric Ion Pore (Mer) Superfamily	Mer
46A_bin.7	Proteobacteria	9.B.105	The Lead Resistance Fusion Protein (PbrBC) Family	PbrBC
46A_bin.8	Proteobacteria	1.A.72	The Mercuric Ion Pore (Mer) Superfamily	Mer
46A_bin.8	Proteobacteria	1.A.72	The Mercuric Ion Pore (Mer) Superfamily	Mer
46A_bin.8	Proteobacteria	9.B.105	The Lead Resistance Fusion Protein (PbrBC) Family	PbrBC
46A_bin.8	Proteobacteria	9.A.8	The Ferrous Iron Uptake (FeoB) Family	FeoB
46A_bin.8	Proteobacteria	9.A.8	The Ferrous Iron Uptake (FeoB) Family	FeoB
46A_bin.8	Proteobacteria	9.B.62	The Copper Resistance (CopD) Family	CopD
46A_bin.9	Methylomirabilota	2.A.55	The Metal Ion (Mn2+-iron) Transporter (Nramp) Family	Nramp
46A_bin.9	Methylomirabilota	1.A.72	The Mercuric Ion Pore (Mer) Superfamily	Mer
46A_bin.9	Methylomirabilota	1.A.72	The Mercuric Ion Pore (Mer) Superfamily	Mer
46A_bin.9	Methylomirabilota	2.A.108	The Iron/Lead Transporter (ILT) Family	ILT
46A_bin.9	Methylomirabilota	9.A.8	The Ferrous Iron Uptake (FeoB) Family	FeoB
46A_bin.9	Methylomirabilota	1.B.76	The Copper Resistance Putative Porin (CopB) Family	CopB
46A_bin.9	Methylomirabilota	1.B.76	The Copper Resistance Putative Porin (CopB) Family	CopB
47A_bin.1	Methylomirabilota	2.A.5	The Zinc (Zn2+)-Iron (Fe2+) Permease (ZIP) Family	ZIP
47A_bin.1	Methylomirabilota	2.A.55	The Metal Ion (Mn2+-iron) Transporter (Nramp) Family	Nramp
47A_bin.1	Methylomirabilota	1.A.72	The Mercuric Ion Pore (Mer) Superfamily	Mer
47A_bin.1	Methylomirabilota	1.A.72	The Mercuric Ion Pore (Mer) Superfamily	Mer
47A_bin.1	Methylomirabilota	9.A.8	The Ferrous Iron Uptake (FeoB) Family	FeoB
47A_bin.1	Methylomirabilota	1.B.76	The Copper Resistance Putative Porin (CopB) Family	CopB
47A_bin.10	Proteobacteria	1.A.72	The Mercuric Ion Pore (Mer) Superfamily	Mer
47A_bin.10	Proteobacteria	1.A.72	The Mercuric Ion Pore (Mer) Superfamily	Mer
47A_bin.10	Proteobacteria	9.B.105	The Lead Resistance Fusion Protein (PbrBC) Family	PbrBC
47A_bin.10	Proteobacteria	2.A.108	The Iron/Lead Transporter (ILT) Family	ILT
47A_bin.10	Proteobacteria	9.A.8	The Ferrous Iron Uptake (FeoB) Family	FeoB
47A_bin.11	Methylomirabilota	2.A.108	The Iron/Lead Transporter (ILT) Family	ILT
47A_bin.12	Proteobacteria	2.A.5	The Zinc (Zn2+)-Iron (Fe2+) Permease (ZIP) Family	ZIP
47A_bin.13	Proteobacteria	9.B.10	The Putative Tripartite Zn2+ Transporter (TZT) Family	TZT
47A_bin.13	Proteobacteria	9.B.10	The Putative Tripartite Zn2+ Transporter (TZT) Family	TZT
47A_bin.13	Proteobacteria	1.A.72	The Mercuric Ion Pore (Mer) Superfamily	Mer
47A_bin.13	Proteobacteria	1.A.72	The Mercuric Ion Pore (Mer) Superfamily	Mer
47A_bin.13	Proteobacteria	9.B.105	The Lead Resistance Fusion Protein (PbrBC) Family	PbrBC
47A_bin.14	Acidobacteriota	2.A.5	The Zinc (Zn2+)-Iron (Fe2+) Permease (ZIP) Family	ZIP
47A_bin.14	Acidobacteriota	2.A.119	The Organo-Arsenical Exporter (ArsP) Family	ArsP
47A_bin.14	Acidobacteriota	2.A.119	The Organo-Arsenical Exporter (ArsP) Family	ArsP
47A_bin.14	Acidobacteriota	2.A.55	The Metal Ion (Mn2+-iron) Transporter (Nramp) Family	Nramp
47A_bin.14	Acidobacteriota	1.A.72	The Mercuric Ion Pore (Mer) Superfamily	Mer
47A_bin.14	Acidobacteriota	1.A.72	The Mercuric Ion Pore (Mer) Superfamily	Mer
47A_bin.14	Acidobacteriota	9.A.8	The Ferrous Iron Uptake (FeoB) Family	FeoB
47A_bin.2	Proteobacteria	9.A.8	The Ferrous Iron Uptake (FeoB) Family	FeoB
47A_bin.2	Proteobacteria	9.B.62	The Copper Resistance (CopD) Family	CopD
47A_bin.3	Nitrospirota	2.A.55	The Metal Ion (Mn2+-iron) Transporter (Nramp) Family	Nramp
47A_bin.3	Nitrospirota	1.A.72	The Mercuric Ion Pore (Mer) Superfamily	Mer
47A_bin.3	Nitrospirota	1.A.72	The Mercuric Ion Pore (Mer) Superfamily	Mer
47A_bin.3	Nitrospirota	9.B.105	The Lead Resistance Fusion Protein (PbrBC) Family	PbrBC
47A_bin.3	Nitrospirota	9.A.8	The Ferrous Iron Uptake (FeoB) Family	FeoB
47A_bin.4	Desulfobacterota_B	2.A.5	The Zinc (Zn2+)-Iron (Fe2+) Permease (ZIP) Family	ZIP
47A_bin.4	Desulfobacterota_B	2.A.89	The Vacuolar Iron Transporter (VIT) Family	VIT
47A_bin.4	Desulfobacterota_B	2.A.108	The Iron/Lead Transporter (ILT) Family	ILT
47A_bin.5	Proteobacteria	9.B.105	The Lead Resistance Fusion Protein (PbrBC) Family	PbrBC
47A_bin.5	Proteobacteria	9.A.8	The Ferrous Iron Uptake (FeoB) Family	FeoB
47A_bin.5	Proteobacteria	9.A.8	The Ferrous Iron Uptake (FeoB) Family	FeoB
47A_bin.6	Proteobacteria	2.A.89	The Vacuolar Iron Transporter (VIT) Family	VIT
47A_bin.6	Proteobacteria	9.B.10	The Putative Tripartite Zn2+ Transporter (TZT) Family	TZT
47A_bin.6	Proteobacteria	9.A.8	The Ferrous Iron Uptake (FeoB) Family	FeoB
47A_bin.7	Proteobacteria	2.A.5	The Zinc (Zn2+)-Iron (Fe2+) Permease (ZIP) Family	ZIP
47A_bin.7	Proteobacteria	9.B.105	The Lead Resistance Fusion Protein (PbrBC) Family	PbrBC
47A_bin.8	Nitrospinota	2.A.5	The Zinc (Zn2+)-Iron (Fe2+) Permease (ZIP) Family	ZIP
47A_bin.8	Nitrospinota	2.A.108	The Iron/Lead Transporter (ILT) Family	ILT
47A_bin.9	Proteobacteria	9.B.10	The Putative Tripartite Zn2+ Transporter (TZT) Family	TZT
47A_bin.9	Proteobacteria	1.A.72	The Mercuric Ion Pore (Mer) Superfamily	Mer
47A_bin.9	Proteobacteria	1.A.72	The Mercuric Ion Pore (Mer) Superfamily	Mer
47A_bin.9	Proteobacteria	1.A.72	The Mercuric Ion Pore (Mer) Superfamily	Mer
47A_bin.9	Proteobacteria	1.A.72	The Mercuric Ion Pore (Mer) Superfamily	Mer
47A_bin.9	Proteobacteria	1.A.72	The Mercuric Ion Pore (Mer) Superfamily	Mer
47A_bin.9	Proteobacteria	1.A.72	The Mercuric Ion Pore (Mer) Superfamily	Mer
47A_bin.9	Proteobacteria	9.B.105	The Lead Resistance Fusion Protein (PbrBC) Family	PbrBC
BC1_bin.1	Desulfobacterota_B	2.A.5	The Zinc (Zn2+)-Iron (Fe2+) Permease (ZIP) Family	ZIP
BC1_bin.10	Methylomirabilota	2.A.55	The Metal Ion (Mn2+-iron) Transporter (Nramp) Family	Nramp
BC1_bin.10	Methylomirabilota	1.A.72	The Mercuric Ion Pore (Mer) Superfamily	Mer
BC1_bin.10	Methylomirabilota	9.A.8	The Ferrous Iron Uptake (FeoB) Family	FeoB
BC1_bin.10	Methylomirabilota	1.B.76	The Copper Resistance Putative Porin (CopB) Family	CopB
BC1_bin.11	KSB1	2.A.55	The Metal Ion (Mn2+-iron) Transporter (Nramp) Family	Nramp
BC1_bin.11	KSB1	2.A.55	The Metal Ion (Mn2+-iron) Transporter (Nramp) Family	Nramp
BC1_bin.11	KSB1	1.A.72	The Mercuric Ion Pore (Mer) Superfamily	Mer
BC1_bin.11	KSB1	9.B.105	The Lead Resistance Fusion Protein (PbrBC) Family	PbrBC
BC1_bin.11	KSB1	2.A.108	The Iron/Lead Transporter (ILT) Family	ILT
BC1_bin.11	KSB1	9.A.8	The Ferrous Iron Uptake (FeoB) Family	FeoB
BC1_bin.11	KSB1	9.A.8	The Ferrous Iron Uptake (FeoB) Family	FeoB
BC1_bin.12	Proteobacteria	1.A.72	The Mercuric Ion Pore (Mer) Superfamily	Mer
BC1_bin.12	Proteobacteria	1.A.72	The Mercuric Ion Pore (Mer) Superfamily	Mer
BC1_bin.12	Proteobacteria	1.A.72	The Mercuric Ion Pore (Mer) Superfamily	Mer
BC1_bin.12	Proteobacteria	1.A.72	The Mercuric Ion Pore (Mer) Superfamily	Mer
BC1_bin.12	Proteobacteria	1.A.72	The Mercuric Ion Pore (Mer) Superfamily	Mer
BC1_bin.12	Proteobacteria	1.A.72	The Mercuric Ion Pore (Mer) Superfamily	Mer
BC1_bin.12	Proteobacteria	9.B.105	The Lead Resistance Fusion Protein (PbrBC) Family	PbrBC
BC1_bin.12	Proteobacteria	2.A.108	The Iron/Lead Transporter (ILT) Family	ILT
BC1_bin.12	Proteobacteria	9.A.8	The Ferrous Iron Uptake (FeoB) Family	FeoB
BC1_bin.2	Proteobacteria	9.B.10	The Putative Tripartite Zn2+ Transporter (TZT) Family	TZT
BC1_bin.2	Proteobacteria	9.B.105	The Lead Resistance Fusion Protein (PbrBC) Family	PbrBC
BC1_bin.3	Actinobacteriota	9.B.105	The Lead Resistance Fusion Protein (PbrBC) Family	PbrBC
BC1_bin.3	Actinobacteriota	3.A.4	The Arsenite-Antimonite (ArsAB) Efflux Family	ArsB
BC1_bin.4	Nitrospirota	1.A.72	The Mercuric Ion Pore (Mer) Superfamily	Mer
BC1_bin.4	Nitrospirota	9.B.105	The Lead Resistance Fusion Protein (PbrBC) Family	PbrBC
BC1_bin.4	Nitrospirota	9.A.8	The Ferrous Iron Uptake (FeoB) Family	FeoB
BC1_bin.5	Proteobacteria	1.A.72	The Mercuric Ion Pore (Mer) Superfamily	Mer
BC1_bin.5	Proteobacteria	1.A.72	The Mercuric Ion Pore (Mer) Superfamily	Mer
BC1_bin.5	Proteobacteria	1.A.72	The Mercuric Ion Pore (Mer) Superfamily	Mer
BC1_bin.5	Proteobacteria	9.B.105	The Lead Resistance Fusion Protein (PbrBC) Family	PbrBC
BC1_bin.6	Proteobacteria	9.B.105	The Lead Resistance Fusion Protein (PbrBC) Family	PbrBC
BC1_bin.6	Proteobacteria	9.A.8	The Ferrous Iron Uptake (FeoB) Family	FeoB
BC1_bin.6	Proteobacteria	9.A.8	The Ferrous Iron Uptake (FeoB) Family	FeoB
BC1_bin.6	Proteobacteria	1.B.76	The Copper Resistance Putative Porin (CopB) Family	CopB
BC1_bin.6	Proteobacteria	9.B.62	The Copper Resistance (CopD) Family	CopD
BC1_bin.7	Chloroflexota	2.A.108	The Iron/Lead Transporter (ILT) Family	ILT
BC1_bin.7	Chloroflexota	9.B.62	The Copper Resistance (CopD) Family	CopD
BC1_bin.7	Chloroflexota	3.A.4	The Arsenite-Antimonite (ArsAB) Efflux Family	ArsB
BC1_bin.8	Proteobacteria	2.A.89	The Vacuolar Iron Transporter (VIT) Family	VIT
BC1_bin.8	Proteobacteria	9.B.10	The Putative Tripartite Zn2+ Transporter (TZT) Family	TZT
BC1_bin.9	Proteobacteria	2.A.89	The Vacuolar Iron Transporter (VIT) Family	VIT
BC1_bin.9	Proteobacteria	9.B.105	The Lead Resistance Fusion Protein (PbrBC) Family	PbrBC
BC11_bin.1	Proteobacteria	9.B.105	The Lead Resistance Fusion Protein (PbrBC) Family	PbrBC
BC11_bin.2	Proteobacteria	2.A.89	The Vacuolar Iron Transporter (VIT) Family	VIT
BC11_bin.2	Proteobacteria	9.B.10	The Putative Tripartite Zn2+ Transporter (TZT) Family	TZT
BC11_bin.2	Proteobacteria	2.A.107	The MntP Mn2+ exporter (MntP) Family	MntP
BC11_bin.2	Proteobacteria	2.A.107	The MntP Mn2+ exporter (MntP) Family	MntP
BC11_bin.2	Proteobacteria	1.A.72	The Mercuric Ion Pore (Mer) Superfamily	Mer
BC11_bin.2	Proteobacteria	1.A.72	The Mercuric Ion Pore (Mer) Superfamily	Mer
BC11_bin.2	Proteobacteria	9.B.105	The Lead Resistance Fusion Protein (PbrBC) Family	PbrBC
BC11_bin.2	Proteobacteria	9.A.8	The Ferrous Iron Uptake (FeoB) Family	FeoB
BC11_bin.3	Chloroflexota	2.A.89	The Vacuolar Iron Transporter (VIT) Family	VIT
BC11_bin.3	Chloroflexota	2.A.108	The Iron/Lead Transporter (ILT) Family	ILT
BC11_bin.4	Methylomirabilota	2.A.55	The Metal Ion (Mn2+-iron) Transporter (Nramp) Family	Nramp
BC11_bin.4	Methylomirabilota	1.A.72	The Mercuric Ion Pore (Mer) Superfamily	Mer
BC11_bin.4	Methylomirabilota	9.A.8	The Ferrous Iron Uptake (FeoB) Family	FeoB
BC11_bin.4	Methylomirabilota	1.B.76	The Copper Resistance Putative Porin (CopB) Family	CopB
BC2_bin.1	Nitrospirota	1.A.72	The Mercuric Ion Pore (Mer) Superfamily	Mer
BC2_bin.1	Nitrospirota	1.A.72	The Mercuric Ion Pore (Mer) Superfamily	Mer
BC2_bin.1	Nitrospirota	9.A.8	The Ferrous Iron Uptake (FeoB) Family	FeoB
BC2_bin.1	Nitrospirota	9.B.62	The Copper Resistance (CopD) Family	CopD
BC2_bin.2	Proteobacteria	9.B.105	The Lead Resistance Fusion Protein (PbrBC) Family	PbrBC
BC2_bin.2	Proteobacteria	9.A.8	The Ferrous Iron Uptake (FeoB) Family	FeoB
BC2_bin.2	Proteobacteria	9.A.8	The Ferrous Iron Uptake (FeoB) Family	FeoB
BC2_bin.2	Proteobacteria	9.B.62	The Copper Resistance (CopD) Family	CopD
BC2_bin.3	Proteobacteria	9.B.105	The Lead Resistance Fusion Protein (PbrBC) Family	PbrBC
BC2_bin.4	Gemmatimonadota	2.A.5	The Zinc (Zn2+)-Iron (Fe2+) Permease (ZIP) Family	ZIP
BC2_bin.4	Gemmatimonadota	2.A.55	The Metal Ion (Mn2+-iron) Transporter (Nramp) Family	Nramp
BC2_bin.4	Gemmatimonadota	2.A.55	The Metal Ion (Mn2+-iron) Transporter (Nramp) Family	Nramp
BC2_bin.4	Gemmatimonadota	9.A.8	The Ferrous Iron Uptake (FeoB) Family	FeoB
BC2_bin.4	Gemmatimonadota	9.B.62	The Copper Resistance (CopD) Family	CopD
BC2_bin.5	Desulfobacterota_B	9.B.10	The Putative Tripartite Zn2+ Transporter (TZT) Family	TZT
BC2_bin.5	Desulfobacterota_B	2.A.108	The Iron/Lead Transporter (ILT) Family	ILT
BC2_bin.6	Proteobacteria	2.A.89	The Vacuolar Iron Transporter (VIT) Family	VIT
BC2_bin.6	Proteobacteria	9.B.10	The Putative Tripartite Zn2+ Transporter (TZT) Family	TZT
BC2_bin.6	Proteobacteria	2.A.107	The MntP Mn2+ exporter (MntP) Family	MntP
BC2_bin.6	Proteobacteria	1.A.72	The Mercuric Ion Pore (Mer) Superfamily	Mer
BC2_bin.6	Proteobacteria	1.A.72	The Mercuric Ion Pore (Mer) Superfamily	Mer
BC2_bin.6	Proteobacteria	9.B.105	The Lead Resistance Fusion Protein (PbrBC) Family	PbrBC
BC2_bin.6	Proteobacteria	9.A.8	The Ferrous Iron Uptake (FeoB) Family	FeoB
BC5_bin.1	Proteobacteria	2.A.89	The Vacuolar Iron Transporter (VIT) Family	VIT
BC5_bin.1	Proteobacteria	9.B.10	The Putative Tripartite Zn2+ Transporter (TZT) Family	TZT
BC5_bin.1	Proteobacteria	9.A.8	The Ferrous Iron Uptake (FeoB) Family	FeoB
BC5_bin.10	Proteobacteria	2.A.89	The Vacuolar Iron Transporter (VIT) Family	VIT
BC5_bin.10	Proteobacteria	1.A.72	The Mercuric Ion Pore (Mer) Superfamily	Mer
BC5_bin.10	Proteobacteria	1.A.72	The Mercuric Ion Pore (Mer) Superfamily	Mer
BC5_bin.10	Proteobacteria	1.A.72	The Mercuric Ion Pore (Mer) Superfamily	Mer
BC5_bin.10	Proteobacteria	1.A.72	The Mercuric Ion Pore (Mer) Superfamily	Mer
BC5_bin.10	Proteobacteria	1.A.72	The Mercuric Ion Pore (Mer) Superfamily	Mer
BC5_bin.10	Proteobacteria	9.B.62	The Copper Resistance (CopD) Family	CopD
BC5_bin.11	Nitrospirota	1.A.72	The Mercuric Ion Pore (Mer) Superfamily	Mer
BC5_bin.11	Nitrospirota	9.A.8	The Ferrous Iron Uptake (FeoB) Family	FeoB
BC5_bin.12	Nitrospinota	2.A.5	The Zinc (Zn2+)-Iron (Fe2+) Permease (ZIP) Family	ZIP
BC5_bin.12	Nitrospinota	9.B.62	The Copper Resistance (CopD) Family	CopD
BC5_bin.2	Proteobacteria	1.A.72	The Mercuric Ion Pore (Mer) Superfamily	Mer
BC5_bin.2	Proteobacteria	1.A.72	The Mercuric Ion Pore (Mer) Superfamily	Mer
BC5_bin.2	Proteobacteria	1.A.72	The Mercuric Ion Pore (Mer) Superfamily	Mer
BC5_bin.2	Proteobacteria	9.B.105	The Lead Resistance Fusion Protein (PbrBC) Family	PbrBC
BC5_bin.3	KSB1	2.A.55	The Metal Ion (Mn2+-iron) Transporter (Nramp) Family	Nramp
BC5_bin.3	KSB1	9.B.105	The Lead Resistance Fusion Protein (PbrBC) Family	PbrBC
BC5_bin.3	KSB1	9.A.8	The Ferrous Iron Uptake (FeoB) Family	FeoB
BC5_bin.3	KSB1	9.A.8	The Ferrous Iron Uptake (FeoB) Family	FeoB
BC5_bin.4	Proteobacteria	9.B.10	The Putative Tripartite Zn2+ Transporter (TZT) Family	TZT
BC5_bin.4	Proteobacteria	1.A.72	The Mercuric Ion Pore (Mer) Superfamily	Mer
BC5_bin.4	Proteobacteria	1.A.72	The Mercuric Ion Pore (Mer) Superfamily	Mer
BC5_bin.5	Chloroflexota	2.A.108	The Iron/Lead Transporter (ILT) Family	ILT
BC5_bin.5	Chloroflexota	9.B.62	The Copper Resistance (CopD) Family	CopD
BC5_bin.5	Chloroflexota	3.A.4	The Arsenite-Antimonite (ArsAB) Efflux Family	ArsB
BC5_bin.6	Proteobacteria	2.A.55	The Metal Ion (Mn2+-iron) Transporter (Nramp) Family	Nramp
BC5_bin.7	Desulfobacterota_B	2.A.89	The Vacuolar Iron Transporter (VIT) Family	VIT
BC5_bin.8	Nitrospirota	9.B.10	The Putative Tripartite Zn2+ Transporter (TZT) Family	TZT
BC5_bin.8	Nitrospirota	2.A.108	The Iron/Lead Transporter (ILT) Family	ILT
BC5_bin.8	Nitrospirota	9.B.62	The Copper Resistance (CopD) Family	CopD
BC5_bin.8	Nitrospirota	2.A.45	The Arsenite-Antimonite (ArsB) Efflux Family	ArsB
BC5_bin.9	Unclassified	2.A.89	The Vacuolar Iron Transporter (VIT) Family	VIT
BC8_bin.1	Actinobacteriota	2.A.89	The Vacuolar Iron Transporter (VIT) Family	VIT
BC8_bin.1	Actinobacteriota	2.A.89	The Vacuolar Iron Transporter (VIT) Family	VIT
BC8_bin.10	Desulfobacterota_B	2.A.89	The Vacuolar Iron Transporter (VIT) Family	VIT
BC8_bin.10	Desulfobacterota_B	2.A.55	The Metal Ion (Mn2+-iron) Transporter (Nramp) Family	Nramp
BC8_bin.11	Proteobacteria	1.A.72	The Mercuric Ion Pore (Mer) Superfamily	Mer
BC8_bin.11	Proteobacteria	9.B.105	The Lead Resistance Fusion Protein (PbrBC) Family	PbrBC
BC8_bin.12	Unclassified	2.A.45	The Arsenite-Antimonite (ArsB) Efflux Family	ArsB
BC8_bin.12	Unclassified	2.A.45	The Arsenite-Antimonite (ArsB) Efflux Family	ArsB
BC8_bin.13	Nitrospinota	2.A.5	The Zinc (Zn2+)-Iron (Fe2+) Permease (ZIP) Family	ZIP
BC8_bin.13	Nitrospinota	2.A.108	The Iron/Lead Transporter (ILT) Family	ILT
BC8_bin.15	JACPSX01	2.A.119	The Organo-Arsenical Exporter (ArsP) Family	ArsP
BC8_bin.15	JACPSX01	1.A.72	The Mercuric Ion Pore (Mer) Superfamily	Mer
BC8_bin.15	JACPSX01	9.B.105	The Lead Resistance Fusion Protein (PbrBC) Family	PbrBC
BC8_bin.15	JACPSX01	9.A.8	The Ferrous Iron Uptake (FeoB) Family	FeoB
BC8_bin.15	JACPSX01	9.A.8	The Ferrous Iron Uptake (FeoB) Family	FeoB
BC8_bin.2	Methylomirabilota	2.A.55	The Metal Ion (Mn2+-iron) Transporter (Nramp) Family	Nramp
BC8_bin.2	Methylomirabilota	1.A.72	The Mercuric Ion Pore (Mer) Superfamily	Mer
BC8_bin.2	Methylomirabilota	9.A.8	The Ferrous Iron Uptake (FeoB) Family	FeoB
BC8_bin.2	Methylomirabilota	1.B.76	The Copper Resistance Putative Porin (CopB) Family	CopB
BC8_bin.3	Proteobacteria	1.A.72	The Mercuric Ion Pore (Mer) Superfamily	Mer
BC8_bin.3	Proteobacteria	1.A.72	The Mercuric Ion Pore (Mer) Superfamily	Mer
BC8_bin.4	Methylomirabilota	1.B.76	The Copper Resistance Putative Porin (CopB) Family	CopB
BC8_bin.5	Nitrospirota	1.A.72	The Mercuric Ion Pore (Mer) Superfamily	Mer
BC8_bin.5	Nitrospirota	9.B.105	The Lead Resistance Fusion Protein (PbrBC) Family	PbrBC
BC8_bin.5	Nitrospirota	9.A.8	The Ferrous Iron Uptake (FeoB) Family	FeoB
BC8_bin.5	Nitrospirota	1.B.76	The Copper Resistance Putative Porin (CopB) Family	CopB
BC8_bin.6	Proteobacteria	2.A.108	The Iron/Lead Transporter (ILT) Family	ILT
BC8_bin.6	Proteobacteria	9.A.8	The Ferrous Iron Uptake (FeoB) Family	FeoB
BC8_bin.6	Proteobacteria	9.A.8	The Ferrous Iron Uptake (FeoB) Family	FeoB
BC8_bin.7	Proteobacteria	9.A.8	The Ferrous Iron Uptake (FeoB) Family	FeoB
BC8_bin.7	Proteobacteria	9.B.62	The Copper Resistance (CopD) Family	CopD
BC8_bin.8	Acidobacteriota	2.A.5	The Zinc (Zn2+)-Iron (Fe2+) Permease (ZIP) Family	ZIP
BC8_bin.8	Acidobacteriota	2.A.55	The Metal Ion (Mn2+-iron) Transporter (Nramp) Family	Nramp
BC8_bin.8	Acidobacteriota	9.A.8	The Ferrous Iron Uptake (FeoB) Family	FeoB
BC8_bin.9	Proteobacteria	2.A.89	The Vacuolar Iron Transporter (VIT) Family	VIT
BC8_bin.9	Proteobacteria	9.B.10	The Putative Tripartite Zn2+ Transporter (TZT) Family	TZT
BC8_bin.9	Proteobacteria	2.A.107	The MntP Mn2+ exporter (MntP) Family	MntP
BC8_bin.9	Proteobacteria	9.B.105	The Lead Resistance Fusion Protein (PbrBC) Family	PbrBC
BC8_bin.9	Proteobacteria	9.A.8	The Ferrous Iron Uptake (FeoB) Family	FeoB
BC9_bin.1	Proteobacteria	9.B.105	The Lead Resistance Fusion Protein (PbrBC) Family	PbrBC
BC9_bin.1	Proteobacteria	9.A.8	The Ferrous Iron Uptake (FeoB) Family	FeoB
BC9_bin.2	Proteobacteria	9.B.10	The Putative Tripartite Zn2+ Transporter (TZT) Family	TZT
BC9_bin.2	Proteobacteria	1.A.72	The Mercuric Ion Pore (Mer) Superfamily	Mer
BC9_bin.2	Proteobacteria	1.A.72	The Mercuric Ion Pore (Mer) Superfamily	Mer
BC9_bin.2	Proteobacteria	9.B.105	The Lead Resistance Fusion Protein (PbrBC) Family	PbrBC
BC9_bin.2	Proteobacteria	1.B.76	The Copper Resistance Putative Porin (CopB) Family	CopB
BC9_bin.3	Actinobacteriota	3.A.4	The Arsenite-Antimonite (ArsAB) Efflux Family	ArsB
BC9_bin.4	Proteobacteria	9.B.10	The Putative Tripartite Zn2+ Transporter (TZT) Family	TZT
BC9_bin.4	Proteobacteria	1.A.72	The Mercuric Ion Pore (Mer) Superfamily	Mer
BC9_bin.4	Proteobacteria	1.A.72	The Mercuric Ion Pore (Mer) Superfamily	Mer
BC9_bin.4	Proteobacteria	9.B.105	The Lead Resistance Fusion Protein (PbrBC) Family	PbrBC
BC9_bin.4	Proteobacteria	9.A.8	The Ferrous Iron Uptake (FeoB) Family	FeoB
BC9_bin.6	Chloroflexota	2.A.89	The Vacuolar Iron Transporter (VIT) Family	VIT
BC9_bin.6	Chloroflexota	9.B.62	The Copper Resistance (CopD) Family	CopD
BC9_bin.6	Chloroflexota	3.A.4	The Arsenite-Antimonite (ArsAB) Efflux Family	ArsB

## Sheet: S5
Table S5. Information on metal redox annotations of MAGs from deep-sea nodule-area sediment samples.
MAGs ID	MAG's classification at the phylum level	Family	Function annotation
37A_bin.1	Proteobacteria	WP_012659228	MerA
37A_bin.1	Proteobacteria	NP_416167	NemA
37A_bin.1	Proteobacteria	WP_012659228	MerA
37A_bin.1	Proteobacteria	NP_417960	ArsC
37A_bin.1	Proteobacteria	WP_012659228	MerA
37A_bin.2	Proteobacteria	WP_012659228	MerA
37A_bin.2	Proteobacteria	AVY91883	AioA
37A_bin.2	Proteobacteria	AVY91883	AioA
37A_bin.2	Proteobacteria	WP_012659228	MerA
37A_bin.2	Proteobacteria	WP_000790334	MerB
37A_bin.2	Proteobacteria	WP_012659228	MerA
37A_bin.2	Proteobacteria	WP_012659228	MerA
37A_bin.2	Proteobacteria	NP_250755	PcoA
37A_bin.3	Proteobacteria	WP_012659228	MerA
37A_bin.3	Proteobacteria	WP_012659228	MerA
37A_bin.3	Proteobacteria	AVY91883	AioA
37A_bin.3	Proteobacteria	WP_012659228	MerA
37A_bin.3	Proteobacteria	NP_416167	NemA
37A_bin.3	Proteobacteria	WP_012659228	MerA
37A_bin.3	Proteobacteria	WP_012659228	MerA
37A_bin.3	Proteobacteria	WP_012659228	MerA
37A_bin.3	Proteobacteria	WP_012659228	MerA
37A_bin.3	Proteobacteria	WP_012659228	MerA
37A_bin.3	Proteobacteria	NP_416167	NemA
37A_bin.3	Proteobacteria	WP_012659228	MerA
37A_bin.3	Proteobacteria	WP_012659228	MerA
37A_bin.3	Proteobacteria	WP_012659228	MerA
37A_bin.3	Proteobacteria	WP_012659228	MerA
37A_bin.3	Proteobacteria	WP_012659228	MerA
37A_bin.4	KSB1	AVY91883	AioA
37A_bin.4	KSB1	WP_012659228	MerA
37A_bin.5	Desulfobacterota_B	WP_012659228	MerA
37A_bin.5	Desulfobacterota_B	WP_011338712	ChrR
37A_bin.5	Desulfobacterota_B	WP_012659228	MerA
37A_bin.5	Desulfobacterota_B	WP_012659228	MerA
37A_bin.5	Desulfobacterota_B	WP_012659228	MerA
37A_bin.5	Desulfobacterota_B	WP_012659228	MerA
37A_bin.5	Desulfobacterota_B	WP_012659228	MerA
37A_bin.5	Desulfobacterota_B	WP_012659228	MerA
37A_bin.6	Proteobacteria	WP_012659228	MerA
37A_bin.6	Proteobacteria	WP_012659228	MerA
37A_bin.6	Proteobacteria	WP_012659228	MerA
37A_bin.6	Proteobacteria	NP_250755	PcoA
37A_bin.6	Proteobacteria	ADD75925	CueO
37A_bin.6	Proteobacteria	NP_416167	NemA
37A_bin.6	Proteobacteria	WP_012659228	MerA
37A_bin.6	Proteobacteria	AVY91883	AioA
37A_bin.6	Proteobacteria	WP_012659228	MerA
37A_bin.6	Proteobacteria	WP_012659228	MerA
37A_bin.6	Proteobacteria	WP_012659228	MerA
37A_bin.7	Nitrospirota	AVY91883	AioA
37A_bin.7	Nitrospirota	WP_012659228	MerA
37A_bin.7	Nitrospirota	WP_012659228	MerA
37A_bin.7	Nitrospirota	WP_012659228	MerA
37A_bin.7	Nitrospirota	WP_012659228	MerA
37A_bin.7	Nitrospirota	AVY91883	AioA
37A_bin.7	Nitrospirota	WP_000790334	MerB
37A_bin.7	Nitrospirota	WP_012659228	MerA
37A_bin.7	Nitrospirota	WP_012659228	MerA
37A_bin.7	Nitrospirota	WP_012659228	MerA
38A_bin.1	Proteobacteria	WP_012659228	MerA
38A_bin.1	Proteobacteria	WP_012659228	MerA
38A_bin.1	Proteobacteria	WP_012659228	MerA
38A_bin.1	Proteobacteria	AVY91883	AioA
38A_bin.1	Proteobacteria	NP_416167	NemA
38A_bin.1	Proteobacteria	WP_012659228	MerA
38A_bin.1	Proteobacteria	WP_012659228	MerA
38A_bin.1	Proteobacteria	WP_000790334	MerB
38A_bin.1	Proteobacteria	WP_012659228	MerA
38A_bin.1	Proteobacteria	NP_416167	NemA
38A_bin.1	Proteobacteria	NP_416167	NemA
38A_bin.1	Proteobacteria	AVY91883	AioA
38A_bin.1	Proteobacteria	NP_416167	NemA
38A_bin.2	Proteobacteria	WP_012659228	MerA
38A_bin.2	Proteobacteria	WP_012659228	MerA
38A_bin.2	Proteobacteria	WP_012659228	MerA
38A_bin.2	Proteobacteria	NP_250755	PcoA
38A_bin.2	Proteobacteria	NP_250755	PcoA
38A_bin.2	Proteobacteria	ADD75925	CueO
38A_bin.2	Proteobacteria	AFK33221	CotA
38A_bin.2	Proteobacteria	NP_417960	ArsC
38A_bin.2	Proteobacteria	WP_012659228	MerA
38A_bin.2	Proteobacteria	WP_012659228	MerA
38A_bin.3	Nitrospirota	WP_012659228	MerA
38A_bin.3	Nitrospirota	WP_012659228	MerA
38A_bin.3	Nitrospirota	WP_011534027	mnxG
38A_bin.3	Nitrospirota	WP_011534027	mnxG
38A_bin.3	Nitrospirota	WP_011534027	mnxG
38A_bin.3	Nitrospirota	WP_011534027	mnxG
38A_bin.3	Nitrospirota	WP_011534027	mnxG
38A_bin.3	Nitrospirota	WP_012659228	MerA
38A_bin.3	Nitrospirota	NP_417960	ArsC
38A_bin.3	Nitrospirota	WP_012659228	MerA
38A_bin.3	Nitrospirota	WP_000790334	MerB
38A_bin.3	Nitrospirota	AVY91883	AioA
38A_bin.3	Nitrospirota	WP_012659228	MerA
38A_bin.3	Nitrospirota	AVY91883	AioA
38A_bin.3	Nitrospirota	AVY91883	AioA
38A_bin.3	Nitrospirota	WP_012659228	MerA
38A_bin.3	Nitrospirota	WP_012659228	MerA
38A_bin.3	Nitrospirota	WP_012659228	MerA
38A_bin.3	Nitrospirota	NP_416167	NemA
38A_bin.4	Proteobacteria	WP_012659228	MerA
38A_bin.4	Proteobacteria	NP_250755	PcoA
38A_bin.4	Proteobacteria	ADD75925	CueO
38A_bin.4	Proteobacteria	AVY91883	AioA
38A_bin.4	Proteobacteria	WP_012659228	MerA
38A_bin.4	Proteobacteria	NP_416167	NemA
38A_bin.4	Proteobacteria	NP_416167	NemA
38A_bin.4	Proteobacteria	WP_012659228	MerA
38A_bin.4	Proteobacteria	WP_012659228	MerA
38A_bin.4	Proteobacteria	WP_012659228	MerA
38A_bin.4	Proteobacteria	AVY91883	AioA
38A_bin.5	Proteobacteria	WP_012659228	MerA
38A_bin.5	Proteobacteria	NP_417960	ArsC
38A_bin.5	Proteobacteria	NP_416167	NemA
38A_bin.5	Proteobacteria	WP_012659228	MerA
38A_bin.5	Proteobacteria	NP_416167	NemA
38A_bin.5	Proteobacteria	WP_012659228	MerA
38A_bin.5	Proteobacteria	WP_012659228	MerA
38A_bin.6	Gemmatimonadota	WP_012659228	MerA
38A_bin.6	Gemmatimonadota	NP_250755	PcoA
38A_bin.6	Gemmatimonadota	NP_250755	PcoA
38A_bin.6	Gemmatimonadota	ADD75925	CueO
38A_bin.6	Gemmatimonadota	AFK33221	CotA
38A_bin.6	Gemmatimonadota	NP_250755	PcoA
38A_bin.6	Gemmatimonadota	ADD75925	CueO
38A_bin.6	Gemmatimonadota	AFK33221	CotA
38A_bin.6	Gemmatimonadota	WP_012659228	MerA
38A_bin.6	Gemmatimonadota	WP_012659228	MerA
38A_bin.6	Gemmatimonadota	WP_012659228	MerA
38A_bin.6	Gemmatimonadota	NP_250755	PcoA
38A_bin.6	Gemmatimonadota	ADD75925	CueO
38A_bin.6	Gemmatimonadota	NP_416167	NemA
38A_bin.6	Gemmatimonadota	WP_012659228	MerA
38A_bin.6	Gemmatimonadota	WP_012659228	MerA
39A_bin.1	Proteobacteria	AVY91883	AioA
39A_bin.1	Proteobacteria	WP_012659228	MerA
39A_bin.1	Proteobacteria	WP_012659228	MerA
39A_bin.1	Proteobacteria	NP_250755	PcoA
39A_bin.1	Proteobacteria	ADD75925	CueO
39A_bin.1	Proteobacteria	WP_012659228	MerA
39A_bin.1	Proteobacteria	WP_012659228	MerA
39A_bin.1	Proteobacteria	NP_416167	NemA
39A_bin.1	Proteobacteria	NP_416167	NemA
39A_bin.1	Proteobacteria	NP_416167	NemA
39A_bin.1	Proteobacteria	WP_012659228	MerA
39A_bin.1	Proteobacteria	WP_012659228	MerA
39A_bin.1	Proteobacteria	WP_012659228	MerA
39A_bin.1	Proteobacteria	WP_012659228	MerA
39A_bin.1	Proteobacteria	AVY91883	AioA
39A_bin.1	Proteobacteria	WP_000790334	MerB
39A_bin.1	Proteobacteria	NP_416167	NemA
39A_bin.1	Proteobacteria	WP_012659228	MerA
39A_bin.1	Proteobacteria	NP_250755	PcoA
39A_bin.1	Proteobacteria	NP_416167	NemA
39A_bin.1	Proteobacteria	NP_250755	PcoA
39A_bin.2	Proteobacteria	WP_012659228	MerA
39A_bin.2	Proteobacteria	WP_012659228	MerA
39A_bin.2	Proteobacteria	WP_012659228	MerA
39A_bin.2	Proteobacteria	NP_250755	PcoA
39A_bin.2	Proteobacteria	NP_250755	PcoA
39A_bin.2	Proteobacteria	ADD75925	CueO
39A_bin.2	Proteobacteria	WP_012659228	MerA
39A_bin.2	Proteobacteria	NP_250755	PcoA
39A_bin.2	Proteobacteria	WP_012659228	MerA
39A_bin.2	Proteobacteria	AVY91883	AioA
39A_bin.2	Proteobacteria	WP_012659228	MerA
39A_bin.2	Proteobacteria	NP_416167	NemA
39A_bin.2	Proteobacteria	WP_012659228	MerA
39A_bin.2	Proteobacteria	WP_012659228	MerA
39A_bin.2	Proteobacteria	WP_012659228	MerA
39A_bin.2	Proteobacteria	NP_250755	PcoA
39A_bin.2	Proteobacteria	WP_012659228	MerA
39A_bin.2	Proteobacteria	NP_416167	NemA
39A_bin.3	Gemmatimonadota	WP_012659228	MerA
39A_bin.3	Gemmatimonadota	AFK33221	CotA
39A_bin.3	Gemmatimonadota	NP_250755	PcoA
39A_bin.3	Gemmatimonadota	NP_250755	PcoA
39A_bin.3	Gemmatimonadota	NP_250755	PcoA
39A_bin.3	Gemmatimonadota	ADD75925	CueO
39A_bin.3	Gemmatimonadota	ADD75925	CueO
39A_bin.3	Gemmatimonadota	AFK33221	CotA
39A_bin.3	Gemmatimonadota	NP_250755	PcoA
39A_bin.3	Gemmatimonadota	ADD75925	CueO
39A_bin.3	Gemmatimonadota	NP_250755	PcoA
39A_bin.3	Gemmatimonadota	WP_012659228	MerA
39A_bin.3	Gemmatimonadota	AVY91883	AioA
39A_bin.3	Gemmatimonadota	WP_012659228	MerA
39A_bin.3	Gemmatimonadota	NP_250755	PcoA
39A_bin.3	Gemmatimonadota	AFK33221	CotA
39A_bin.3	Gemmatimonadota	WP_012659228	MerA
39A_bin.3	Gemmatimonadota	NP_416167	NemA
39A_bin.3	Gemmatimonadota	WP_012659228	MerA
39A_bin.3	Gemmatimonadota	NP_250755	PcoA
39A_bin.3	Gemmatimonadota	AFK33221	CotA
39A_bin.3	Gemmatimonadota	WP_012659228	MerA
39A_bin.3	Gemmatimonadota	NP_250755	PcoA
39A_bin.3	Gemmatimonadota	NP_250755	PcoA
39A_bin.3	Gemmatimonadota	ADD75925	CueO
39A_bin.3	Gemmatimonadota	AFK33221	CotA
39A_bin.3	Gemmatimonadota	NP_250755	PcoA
39A_bin.3	Gemmatimonadota	NP_250755	PcoA
39A_bin.3	Gemmatimonadota	ADD75925	CueO
39A_bin.3	Gemmatimonadota	AFK33221	CotA
39A_bin.3	Gemmatimonadota	NP_250755	PcoA
39A_bin.4	Desulfobacterota_B	WP_012659228	MerA
39A_bin.4	Desulfobacterota_B	AVY91883	AioA
39A_bin.4	Desulfobacterota_B	WP_011338712	ChrR
39A_bin.4	Desulfobacterota_B	WP_012659228	MerA
39A_bin.4	Desulfobacterota_B	WP_012659228	MerA
39A_bin.4	Desulfobacterota_B	WP_012659228	MerA
39A_bin.4	Desulfobacterota_B	WP_012659228	MerA
39A_bin.4	Desulfobacterota_B	WP_012659228	MerA
39A_bin.5	Proteobacteria	WP_012659228	MerA
39A_bin.5	Proteobacteria	WP_012659228	MerA
39A_bin.5	Proteobacteria	WP_012659228	MerA
39A_bin.5	Proteobacteria	WP_012659228	MerA
39A_bin.5	Proteobacteria	WP_000790334	MerB
39A_bin.5	Proteobacteria	AVY91883	AioA
39A_bin.5	Proteobacteria	AVY91883	AioA
39A_bin.5	Proteobacteria	WP_012659228	MerA
39A_bin.5	Proteobacteria	NP_416167	NemA
39A_bin.5	Proteobacteria	NP_416167	NemA
39A_bin.5	Proteobacteria	NP_250755	PcoA
39A_bin.6	Nitrospirota	NP_417960	ArsC
39A_bin.6	Nitrospirota	WP_000790334	MerB
39A_bin.6	Nitrospirota	WP_012659228	MerA
39A_bin.6	Nitrospirota	WP_012659228	MerA
39A_bin.6	Nitrospirota	WP_012659228	MerA
39A_bin.6	Nitrospirota	AVY91883	AioA
39A_bin.6	Nitrospirota	WP_011534027	mnxG
39A_bin.6	Nitrospirota	WP_011534027	mnxG
39A_bin.6	Nitrospirota	WP_012659228	MerA
39A_bin.6	Nitrospirota	AVY91883	AioA
39A_bin.6	Nitrospirota	WP_012659228	MerA
39A_bin.6	Nitrospirota	WP_012659228	MerA
39A_bin.6	Nitrospirota	WP_012659228	MerA
39A_bin.7	Proteobacteria	WP_012659228	MerA
39A_bin.7	Proteobacteria	NP_250755	PcoA
39A_bin.7	Proteobacteria	ADD75925	CueO
39A_bin.7	Proteobacteria	AFK33221	CotA
39A_bin.7	Proteobacteria	WP_012659228	MerA
39A_bin.7	Proteobacteria	NP_417960	ArsC
39A_bin.7	Proteobacteria	NP_416167	NemA
39A_bin.7	Proteobacteria	WP_012659228	MerA
39A_bin.8	Proteobacteria	WP_012659228	MerA
39A_bin.8	Proteobacteria	WP_012659228	MerA
39A_bin.8	Proteobacteria	WP_012659228	MerA
39A_bin.8	Proteobacteria	NP_416167	NemA
39A_bin.8	Proteobacteria	WP_012659228	MerA
39A_bin.8	Proteobacteria	AFK33221	CotA
39A_bin.8	Proteobacteria	NP_250755	PcoA
39A_bin.8	Proteobacteria	NP_416167	NemA
39A_bin.8	Proteobacteria	NP_250755	PcoA
39A_bin.8	Proteobacteria	ADD75925	CueO
39A_bin.8	Proteobacteria	WP_012659228	MerA
39A_bin.8	Proteobacteria	WP_012659228	MerA
39A_bin.8	Proteobacteria	WP_012659228	MerA
40A_bin.1	Proteobacteria	WP_012659228	MerA
40A_bin.1	Proteobacteria	WP_000790334	MerB
40A_bin.1	Proteobacteria	WP_012659228	MerA
40A_bin.1	Proteobacteria	WP_012659228	MerA
40A_bin.1	Proteobacteria	WP_012659228	MerA
40A_bin.1	Proteobacteria	AVY91883	AioA
40A_bin.1	Proteobacteria	AVY91883	AioA
40A_bin.1	Proteobacteria	WP_012659228	MerA
40A_bin.1	Proteobacteria	WP_012659228	MerA
40A_bin.1	Proteobacteria	WP_012659228	MerA
40A_bin.2	Nitrospinota	WP_012659228	MerA
40A_bin.2	Nitrospinota	WP_012659228	MerA
40A_bin.2	Nitrospinota	WP_012659228	MerA
40A_bin.2	Nitrospinota	WP_012659228	MerA
40A_bin.3	Proteobacteria	WP_012659228	MerA
40A_bin.3	Proteobacteria	NP_417960	ArsC
40A_bin.3	Proteobacteria	WP_012659228	MerA
40A_bin.3	Proteobacteria	NP_416167	NemA
40A_bin.3	Proteobacteria	WP_012659228	MerA
40A_bin.4	Gemmatimonadota	NP_416167	NemA
40A_bin.4	Gemmatimonadota	NP_250755	PcoA
40A_bin.4	Gemmatimonadota	NP_250755	PcoA
40A_bin.4	Gemmatimonadota	ADD75925	CueO
40A_bin.4	Gemmatimonadota	AFK33221	CotA
40A_bin.4	Gemmatimonadota	WP_012659228	MerA
40A_bin.4	Gemmatimonadota	NP_250755	PcoA
40A_bin.4	Gemmatimonadota	ADD75925	CueO
40A_bin.4	Gemmatimonadota	NP_250755	PcoA
40A_bin.4	Gemmatimonadota	WP_012659228	MerA
40A_bin.4	Gemmatimonadota	WP_012659228	MerA
40A_bin.4	Gemmatimonadota	NP_250755	PcoA
40A_bin.4	Gemmatimonadota	AFK33221	CotA
40A_bin.5	Proteobacteria	WP_012659228	MerA
40A_bin.5	Proteobacteria	WP_012659228	MerA
40A_bin.5	Proteobacteria	WP_012659228	MerA
40A_bin.5	Proteobacteria	AVY91883	AioA
40A_bin.5	Proteobacteria	NP_416167	NemA
40A_bin.5	Proteobacteria	WP_012659228	MerA
40A_bin.5	Proteobacteria	NP_250755	PcoA
40A_bin.5	Proteobacteria	WP_012659228	MerA
40A_bin.5	Proteobacteria	WP_012659228	MerA
40A_bin.5	Proteobacteria	NP_416167	NemA
40A_bin.5	Proteobacteria	WP_012659228	MerA
40A_bin.5	Proteobacteria	WP_000790334	MerB
40A_bin.5	Proteobacteria	WP_012659228	MerA
40A_bin.5	Proteobacteria	WP_012659228	MerA
40A_bin.6	Proteobacteria	WP_012659228	MerA
40A_bin.6	Proteobacteria	WP_012659228	MerA
40A_bin.6	Proteobacteria	NP_416167	NemA
40A_bin.6	Proteobacteria	WP_012659228	MerA
40A_bin.6	Proteobacteria	WP_012659228	MerA
40A_bin.6	Proteobacteria	WP_012659228	MerA
40A_bin.6	Proteobacteria	WP_012659228	MerA
40A_bin.6	Proteobacteria	WP_012659228	MerA
40A_bin.6	Proteobacteria	WP_000790334	MerB
40A_bin.6	Proteobacteria	WP_012659228	MerA
40A_bin.6	Proteobacteria	AVY91883	AioA
40A_bin.6	Proteobacteria	WP_012659228	MerA
40A_bin.6	Proteobacteria	WP_012659228	MerA
40A_bin.6	Proteobacteria	WP_012659228	MerA
40A_bin.6	Proteobacteria	WP_012659228	MerA
40A_bin.6	Proteobacteria	WP_012659228	MerA
40A_bin.6	Proteobacteria	WP_012659228	MerA
40A_bin.6	Proteobacteria	NP_416167	NemA
40A_bin.7	Proteobacteria	WP_012659228	MerA
40A_bin.7	Proteobacteria	NP_417960	ArsC
40A_bin.7	Proteobacteria	WP_012659228	MerA
40A_bin.7	Proteobacteria	WP_012659228	MerA
40A_bin.7	Proteobacteria	AVY91883	AioA
40A_bin.7	Proteobacteria	WP_012659228	MerA
40A_bin.7	Proteobacteria	NP_250755	PcoA
40A_bin.7	Proteobacteria	ADD75925	CueO
41A_bin.1	Proteobacteria	NP_417960	ArsC
41A_bin.1	Proteobacteria	WP_012659228	MerA
41A_bin.1	Proteobacteria	WP_012659228	MerA
41A_bin.1	Proteobacteria	WP_012659228	MerA
41A_bin.1	Proteobacteria	WP_012659228	MerA
41A_bin.2	Desulfobacterota_B	WP_011338712	ChrR
41A_bin.2	Desulfobacterota_B	WP_012659228	MerA
41A_bin.2	Desulfobacterota_B	AVY91883	AioA
41A_bin.2	Desulfobacterota_B	WP_012659228	MerA
41A_bin.2	Desulfobacterota_B	WP_012659228	MerA
41A_bin.2	Desulfobacterota_B	NP_250755	PcoA
41A_bin.2	Desulfobacterota_B	AFK33221	CotA
41A_bin.2	Desulfobacterota_B	ADD75925	CueO
41A_bin.2	Desulfobacterota_B	WP_012659228	MerA
41A_bin.2	Desulfobacterota_B	WP_012659228	MerA
41A_bin.2	Desulfobacterota_B	WP_012659228	MerA
41A_bin.2	Desulfobacterota_B	WP_012659228	MerA
41A_bin.2	Desulfobacterota_B	WP_012659228	MerA
41A_bin.2	Desulfobacterota_B	WP_012659228	MerA
41A_bin.3	Proteobacteria	WP_012659228	MerA
41A_bin.3	Proteobacteria	NP_416167	NemA
41A_bin.3	Proteobacteria	WP_012659228	MerA
41A_bin.3	Proteobacteria	NP_417960	ArsC
41A_bin.3	Proteobacteria	WP_012659228	MerA
41A_bin.4	Nitrospirota	WP_012659228	MerA
41A_bin.4	Nitrospirota	AVY91883	AioA
41A_bin.4	Nitrospirota	WP_012659228	MerA
41A_bin.4	Nitrospirota	AVY91883	AioA
41A_bin.4	Nitrospirota	WP_012659228	MerA
41A_bin.4	Nitrospirota	WP_012659228	MerA
41A_bin.4	Nitrospirota	WP_012659228	MerA
41A_bin.4	Nitrospirota	WP_000790334	MerB
41A_bin.4	Nitrospirota	WP_012659228	MerA
41A_bin.4	Nitrospirota	NP_416167	NemA
41A_bin.4	Nitrospirota	NP_250755	PcoA
41A_bin.4	Nitrospirota	NP_250755	PcoA
41A_bin.4	Nitrospirota	ADD75925	CueO
41A_bin.4	Nitrospirota	AFK33221	CotA
41A_bin.5	Proteobacteria	WP_012659228	MerA
41A_bin.5	Proteobacteria	AVY91883	AioA
41A_bin.5	Proteobacteria	WP_012659228	MerA
41A_bin.5	Proteobacteria	NP_250755	PcoA
41A_bin.5	Proteobacteria	NP_250755	PcoA
41A_bin.5	Proteobacteria	ADD75925	CueO
41A_bin.5	Proteobacteria	WP_012659228	MerA
41A_bin.5	Proteobacteria	WP_012659228	MerA
41A_bin.5	Proteobacteria	WP_000790334	MerB
41A_bin.5	Proteobacteria	WP_012659228	MerA
41A_bin.5	Proteobacteria	WP_012659228	MerA
41A_bin.5	Proteobacteria	WP_012659228	MerA
41A_bin.5	Proteobacteria	AVY91883	AioA
41A_bin.6	Proteobacteria	WP_012659228	MerA
41A_bin.6	Proteobacteria	NP_250755	PcoA
41A_bin.6	Proteobacteria	NP_250755	PcoA
41A_bin.6	Proteobacteria	ADD75925	CueO
41A_bin.6	Proteobacteria	AFK33221	CotA
41A_bin.6	Proteobacteria	WP_000790334	MerB
41A_bin.6	Proteobacteria	WP_012659228	MerA
41A_bin.6	Proteobacteria	WP_012659228	MerA
41A_bin.6	Proteobacteria	WP_012659228	MerA
41A_bin.6	Proteobacteria	WP_012659228	MerA
41A_bin.7	KSB1	AVK42811	Cyc2
41A_bin.7	KSB1	WP_000790334	MerB
41A_bin.8	Proteobacteria	WP_012659228	MerA
41A_bin.8	Proteobacteria	WP_012659228	MerA
41A_bin.8	Proteobacteria	WP_012659228	MerA
41A_bin.8	Proteobacteria	WP_012659228	MerA
41A_bin.8	Proteobacteria	WP_000790334	MerB
41A_bin.8	Proteobacteria	AVY91883	AioA
41A_bin.8	Proteobacteria	WP_012659228	MerA
41A_bin.8	Proteobacteria	WP_012659228	MerA
41A_bin.9	Proteobacteria	AVY91883	AioA
41A_bin.9	Proteobacteria	WP_012659228	MerA
41A_bin.9	Proteobacteria	WP_012659228	MerA
41A_bin.9	Proteobacteria	WP_012659228	MerA
41A_bin.9	Proteobacteria	WP_012659228	MerA
41A_bin.9	Proteobacteria	WP_012659228	MerA
41A_bin.9	Proteobacteria	WP_012659228	MerA
41A_bin.9	Proteobacteria	AVY91883	AioA
41A_bin.9	Proteobacteria	WP_012659228	MerA
41A_bin.9	Proteobacteria	WP_012659228	MerA
41A_bin.9	Proteobacteria	NP_416167	NemA
41A_bin.9	Proteobacteria	WP_012659228	MerA
41A_bin.9	Proteobacteria	NP_416167	NemA
42A_bin.1	Nitrospinota	WP_012659228	MerA
42A_bin.1	Nitrospinota	WP_012659228	MerA
42A_bin.1	Nitrospinota	WP_000790334	MerB
42A_bin.1	Nitrospinota	WP_012659228	MerA
42A_bin.1	Nitrospinota	NP_250755	PcoA
42A_bin.1	Nitrospinota	ADD75925	CueO
42A_bin.1	Nitrospinota	WP_012659228	MerA
42A_bin.3	Proteobacteria	WP_012659228	MerA
42A_bin.3	Proteobacteria	NP_416167	NemA
42A_bin.3	Proteobacteria	WP_012659228	MerA
42A_bin.3	Proteobacteria	WP_012659228	MerA
42A_bin.3	Proteobacteria	WP_012659228	MerA
42A_bin.3	Proteobacteria	NP_416167	NemA
42A_bin.3	Proteobacteria	WP_012659228	MerA
42A_bin.3	Proteobacteria	AVY91883	AioA
42A_bin.3	Proteobacteria	WP_012659228	MerA
42A_bin.3	Proteobacteria	WP_012659228	MerA
42A_bin.3	Proteobacteria	WP_000790334	MerB
42A_bin.3	Proteobacteria	WP_012659228	MerA
42A_bin.3	Proteobacteria	NP_416167	NemA
42A_bin.3	Proteobacteria	WP_012659228	MerA
42A_bin.4	Nitrospirota	WP_012659228	MerA
42A_bin.4	Nitrospirota	NP_417960	ArsC
42A_bin.4	Nitrospirota	WP_012659228	MerA
42A_bin.4	Nitrospirota	WP_012659228	MerA
42A_bin.4	Nitrospirota	AVY91883	AioA
42A_bin.5	Proteobacteria	WP_012659228	MerA
42A_bin.5	Proteobacteria	WP_012659228	MerA
42A_bin.5	Proteobacteria	WP_012659228	MerA
42A_bin.5	Proteobacteria	AVY91883	AioA
42A_bin.5	Proteobacteria	WP_012659228	MerA
42A_bin.5	Proteobacteria	WP_012659228	MerA
42A_bin.5	Proteobacteria	WP_012659228	MerA
42A_bin.5	Proteobacteria	WP_012659228	MerA
42A_bin.5	Proteobacteria	WP_012659228	MerA
42A_bin.5	Proteobacteria	WP_012659228	MerA
42A_bin.5	Proteobacteria	WP_000790334	MerB
42A_bin.6	Proteobacteria	NP_250755	PcoA
42A_bin.6	Proteobacteria	NP_250755	PcoA
42A_bin.6	Proteobacteria	ADD75925	CueO
42A_bin.6	Proteobacteria	AFK33221	CotA
42A_bin.6	Proteobacteria	WP_012659228	MerA
42A_bin.6	Proteobacteria	NP_417960	ArsC
42A_bin.6	Proteobacteria	WP_012659228	MerA
42A_bin.6	Proteobacteria	WP_000790334	MerB
42A_bin.6	Proteobacteria	WP_012659228	MerA
42A_bin.7	Proteobacteria	WP_012659228	MerA
42A_bin.7	Proteobacteria	AVY91883	AioA
42A_bin.7	Proteobacteria	WP_012659228	MerA
42A_bin.7	Proteobacteria	WP_012659228	MerA
42A_bin.7	Proteobacteria	NP_250755	PcoA
42A_bin.7	Proteobacteria	WP_012659228	MerA
42A_bin.7	Proteobacteria	WP_012659228	MerA
42A_bin.7	Proteobacteria	WP_012659228	MerA
42A_bin.7	Proteobacteria	WP_012659228	MerA
42A_bin.7	Proteobacteria	WP_012659228	MerA
42A_bin.7	Proteobacteria	WP_012659228	MerA
42A_bin.7	Proteobacteria	WP_012659228	MerA
42A_bin.7	Proteobacteria	AVY91883	AioA
42A_bin.7	Proteobacteria	AVY91883	AioA
42A_bin.7	Proteobacteria	NP_250755	PcoA
42A_bin.8	Methylomirabilota	WP_000790334	MerB
42A_bin.8	Methylomirabilota	NP_250755	PcoA
42A_bin.8	Methylomirabilota	NP_250755	PcoA
42A_bin.8	Methylomirabilota	ADD75925	CueO
42A_bin.8	Methylomirabilota	AFK33221	CotA
42A_bin.8	Methylomirabilota	NP_250755	PcoA
42A_bin.8	Methylomirabilota	ADD75925	CueO
42A_bin.8	Methylomirabilota	AFK33221	CotA
42A_bin.8	Methylomirabilota	WP_012659228	MerA
42A_bin.8	Methylomirabilota	WP_012659228	MerA
42A_bin.8	Methylomirabilota	NP_416167	NemA
42A_bin.8	Methylomirabilota	WP_012659228	MerA
42A_bin.8	Methylomirabilota	WP_000790334	MerB
42A_bin.8	Methylomirabilota	WP_012659228	MerA
42A_bin.8	Methylomirabilota	AFK33221	CotA
42A_bin.8	Methylomirabilota	ADD75925	CueO
42A_bin.8	Methylomirabilota	ADD75925	CueO
42A_bin.8	Methylomirabilota	CAA81037	mofA
42A_bin.8	Methylomirabilota	CAA81037	mofA
42A_bin.8	Methylomirabilota	AVY91883	AioA
42A_bin.8	Methylomirabilota	NP_250755	PcoA
42A_bin.8	Methylomirabilota	ADD75925	CueO
42A_bin.9	Proteobacteria	WP_000790334	MerB
42A_bin.9	Proteobacteria	WP_012659228	MerA
42A_bin.9	Proteobacteria	WP_012659228	MerA
42A_bin.9	Proteobacteria	WP_012659228	MerA
42A_bin.9	Proteobacteria	WP_012659228	MerA
42A_bin.9	Proteobacteria	AVY91883	AioA
42A_bin.9	Proteobacteria	AVY91883	AioA
42A_bin.9	Proteobacteria	WP_012659228	MerA
42A_bin.9	Proteobacteria	NP_250755	PcoA
43A_bin.1	Proteobacteria	WP_012659228	MerA
43A_bin.1	Proteobacteria	NP_416167	NemA
43A_bin.1	Proteobacteria	NP_416167	NemA
43A_bin.1	Proteobacteria	WP_012659228	MerA
43A_bin.1	Proteobacteria	AVY91883	AioA
43A_bin.1	Proteobacteria	WP_012659228	MerA
43A_bin.1	Proteobacteria	WP_012659228	MerA
43A_bin.1	Proteobacteria	WP_012659228	MerA
43A_bin.1	Proteobacteria	WP_012659228	MerA
43A_bin.1	Proteobacteria	NP_416167	NemA
43A_bin.1	Proteobacteria	WP_012659228	MerA
43A_bin.1	Proteobacteria	NP_416167	NemA
43A_bin.1	Proteobacteria	WP_012659228	MerA
43A_bin.1	Proteobacteria	WP_012659228	MerA
43A_bin.10	Proteobacteria	WP_012659228	MerA
43A_bin.10	Proteobacteria	WP_012659228	MerA
43A_bin.10	Proteobacteria	AVY91883	AioA
43A_bin.10	Proteobacteria	WP_012659228	MerA
43A_bin.10	Proteobacteria	AVY91883	AioA
43A_bin.10	Proteobacteria	WP_012659228	MerA
43A_bin.10	Proteobacteria	NP_250755	PcoA
43A_bin.10	Proteobacteria	WP_012659228	MerA
43A_bin.10	Proteobacteria	NP_416167	NemA
43A_bin.10	Proteobacteria	NP_250755	PcoA
43A_bin.10	Proteobacteria	WP_012659228	MerA
43A_bin.10	Proteobacteria	WP_000790334	MerB
43A_bin.11	Proteobacteria	WP_012659228	MerA
43A_bin.11	Proteobacteria	WP_012659228	MerA
43A_bin.11	Proteobacteria	NP_417960	ArsC
43A_bin.11	Proteobacteria	WP_012659228	MerA
43A_bin.11	Proteobacteria	NP_416167	NemA
43A_bin.2	Nitrospirota	WP_012659228	MerA
43A_bin.2	Nitrospirota	NP_417960	ArsC
43A_bin.2	Nitrospirota	WP_012659228	MerA
43A_bin.2	Nitrospirota	WP_012659228	MerA
43A_bin.2	Nitrospirota	AVY91883	AioA
43A_bin.2	Nitrospirota	WP_012659228	MerA
43A_bin.2	Nitrospirota	NP_416167	NemA
43A_bin.2	Nitrospirota	AVY91883	AioA
43A_bin.2	Nitrospirota	WP_012659228	MerA
43A_bin.2	Nitrospirota	WP_012659228	MerA
43A_bin.2	Nitrospirota	NP_416167	NemA
43A_bin.2	Nitrospirota	NP_250755	PcoA
43A_bin.2	Nitrospirota	NP_250755	PcoA
43A_bin.2	Nitrospirota	ADD75925	CueO
43A_bin.2	Nitrospirota	AFK33221	CotA
43A_bin.2	Nitrospirota	WP_012659228	MerA
43A_bin.2	Nitrospirota	WP_012659228	MerA
43A_bin.3	Proteobacteria	WP_012659228	MerA
43A_bin.3	Proteobacteria	WP_012659228	MerA
43A_bin.3	Proteobacteria	WP_012659228	MerA
43A_bin.3	Proteobacteria	NP_250755	PcoA
43A_bin.3	Proteobacteria	NP_250755	PcoA
43A_bin.3	Proteobacteria	ADD75925	CueO
43A_bin.3	Proteobacteria	AFK33221	CotA
43A_bin.3	Proteobacteria	NP_417960	ArsC
43A_bin.4	Proteobacteria	WP_012659228	MerA
43A_bin.4	Proteobacteria	WP_012659228	MerA
43A_bin.4	Proteobacteria	WP_012659228	MerA
43A_bin.4	Proteobacteria	WP_012659228	MerA
43A_bin.4	Proteobacteria	NP_417960	ArsC
43A_bin.4	Proteobacteria	NP_250755	PcoA
43A_bin.4	Proteobacteria	ADD75925	CueO
43A_bin.4	Proteobacteria	AFK33221	CotA
43A_bin.5	Proteobacteria	WP_012659228	MerA
43A_bin.5	Proteobacteria	NP_417960	ArsC
43A_bin.5	Proteobacteria	WP_012659228	MerA
43A_bin.5	Proteobacteria	WP_012659228	MerA
43A_bin.5	Proteobacteria	WP_012659228	MerA
43A_bin.5	Proteobacteria	NP_416167	NemA
43A_bin.5	Proteobacteria	NP_250755	PcoA
43A_bin.5	Proteobacteria	WP_012659228	MerA
43A_bin.5	Proteobacteria	NP_250755	PcoA
43A_bin.5	Proteobacteria	ADD75925	CueO
43A_bin.5	Proteobacteria	AFK33221	CotA
43A_bin.5	Proteobacteria	WP_011534027	mnxG
43A_bin.6	Proteobacteria	WP_012659228	MerA
43A_bin.6	Proteobacteria	WP_000790334	MerB
43A_bin.6	Proteobacteria	WP_012659228	MerA
43A_bin.6	Proteobacteria	WP_012659228	MerA
43A_bin.6	Proteobacteria	WP_012659228	MerA
43A_bin.6	Proteobacteria	AVY91883	AioA
43A_bin.7	Unclassified	WP_012659228	MerA
43A_bin.8	Actinobacteriota	NP_416167	NemA
43A_bin.8	Actinobacteriota	WP_000790334	MerB
43A_bin.8	Actinobacteriota	WP_000790334	MerB
43A_bin.8	Actinobacteriota	NP_416167	NemA
43A_bin.8	Actinobacteriota	WP_012659228	MerA
43A_bin.8	Actinobacteriota	AVY91883	AioA
43A_bin.8	Actinobacteriota	WP_012659228	MerA
44A_bin.1	Proteobacteria	WP_012659228	MerA
44A_bin.1	Proteobacteria	AVY91883	AioA
44A_bin.1	Proteobacteria	WP_012659228	MerA
44A_bin.1	Proteobacteria	WP_000790334	MerB
44A_bin.1	Proteobacteria	WP_012659228	MerA
44A_bin.1	Proteobacteria	AVY91883	AioA
44A_bin.1	Proteobacteria	WP_012659228	MerA
44A_bin.1	Proteobacteria	WP_012659228	MerA
44A_bin.1	Proteobacteria	NP_416167	NemA
44A_bin.10	Proteobacteria	WP_012659228	MerA
44A_bin.10	Proteobacteria	WP_012659228	MerA
44A_bin.10	Proteobacteria	AVY91883	AioA
44A_bin.10	Proteobacteria	WP_012659228	MerA
44A_bin.10	Proteobacteria	WP_012659228	MerA
44A_bin.10	Proteobacteria	AVY91883	AioA
44A_bin.10	Proteobacteria	WP_012659228	MerA
44A_bin.10	Proteobacteria	WP_012659228	MerA
44A_bin.10	Proteobacteria	WP_012659228	MerA
44A_bin.10	Proteobacteria	AVY91883	AioA
44A_bin.10	Proteobacteria	WP_012659228	MerA
44A_bin.11	Proteobacteria	AVY91883	AioA
44A_bin.11	Proteobacteria	WP_012659228	MerA
44A_bin.11	Proteobacteria	WP_012659228	MerA
44A_bin.11	Proteobacteria	NP_416167	NemA
44A_bin.11	Proteobacteria	WP_012659228	MerA
44A_bin.11	Proteobacteria	WP_012659228	MerA
44A_bin.11	Proteobacteria	NP_416167	NemA
44A_bin.11	Proteobacteria	WP_012659228	MerA
44A_bin.11	Proteobacteria	WP_000790334	MerB
44A_bin.11	Proteobacteria	WP_012659228	MerA
44A_bin.11	Proteobacteria	WP_012659228	MerA
44A_bin.11	Proteobacteria	NP_416167	NemA
44A_bin.11	Proteobacteria	WP_012659228	MerA
44A_bin.11	Proteobacteria	WP_012659228	MerA
44A_bin.13	Proteobacteria	WP_012659228	MerA
44A_bin.13	Proteobacteria	WP_012659228	MerA
44A_bin.13	Proteobacteria	NP_416167	NemA
44A_bin.13	Proteobacteria	WP_012659228	MerA
44A_bin.13	Proteobacteria	WP_000790334	MerB
44A_bin.13	Proteobacteria	WP_012659228	MerA
44A_bin.13	Proteobacteria	WP_012659228	MerA
44A_bin.13	Proteobacteria	WP_012659228	MerA
44A_bin.13	Proteobacteria	WP_012659228	MerA
44A_bin.13	Proteobacteria	AVY91883	AioA
44A_bin.13	Proteobacteria	WP_012659228	MerA
44A_bin.2	Proteobacteria	WP_012659228	MerA
44A_bin.2	Proteobacteria	NP_416167	NemA
44A_bin.2	Proteobacteria	NP_417960	ArsC
44A_bin.2	Proteobacteria	AVY91883	AioA
44A_bin.2	Proteobacteria	WP_012659228	MerA
44A_bin.3	Methylomirabilota	WP_012659228	MerA
44A_bin.3	Methylomirabilota	NP_250755	PcoA
44A_bin.3	Methylomirabilota	ADD75925	CueO
44A_bin.3	Methylomirabilota	AFK33221	CotA
44A_bin.3	Methylomirabilota	NP_250755	PcoA
44A_bin.3	Methylomirabilota	NP_250755	PcoA
44A_bin.3	Methylomirabilota	ADD75925	CueO
44A_bin.3	Methylomirabilota	AFK33221	CotA
44A_bin.3	Methylomirabilota	WP_012659228	MerA
44A_bin.3	Methylomirabilota	WP_000790334	MerB
44A_bin.3	Methylomirabilota	NP_416167	NemA
44A_bin.3	Methylomirabilota	WP_012659228	MerA
44A_bin.3	Methylomirabilota	WP_012659228	MerA
44A_bin.3	Methylomirabilota	WP_012659228	MerA
44A_bin.3	Methylomirabilota	WP_000790334	MerB
44A_bin.4	Proteobacteria	NP_250755	PcoA
44A_bin.4	Proteobacteria	NP_250755	PcoA
44A_bin.4	Proteobacteria	ADD75925	CueO
44A_bin.4	Proteobacteria	ADD75925	CueO
44A_bin.4	Proteobacteria	AFK33221	CotA
44A_bin.4	Proteobacteria	WP_012659228	MerA
44A_bin.4	Proteobacteria	WP_012659228	MerA
44A_bin.4	Proteobacteria	WP_012659228	MerA
44A_bin.4	Proteobacteria	NP_417960	ArsC
44A_bin.4	Proteobacteria	WP_012659228	MerA
44A_bin.5	Desulfobacterota_B	WP_011338712	ChrR
44A_bin.5	Desulfobacterota_B	WP_012659228	MerA
44A_bin.5	Desulfobacterota_B	WP_012659228	MerA
44A_bin.5	Desulfobacterota_B	AVY91883	AioA
44A_bin.5	Desulfobacterota_B	WP_012659228	MerA
44A_bin.5	Desulfobacterota_B	NP_250755	PcoA
44A_bin.5	Desulfobacterota_B	AFK33221	CotA
44A_bin.5	Desulfobacterota_B	ADD75925	CueO
44A_bin.5	Desulfobacterota_B	WP_012659228	MerA
44A_bin.5	Desulfobacterota_B	WP_012659228	MerA
44A_bin.5	Desulfobacterota_B	WP_012659228	MerA
44A_bin.5	Desulfobacterota_B	WP_012659228	MerA
44A_bin.5	Desulfobacterota_B	WP_012659228	MerA
44A_bin.5	Desulfobacterota_B	WP_012659228	MerA
44A_bin.5	Desulfobacterota_B	AVY91883	AioA
44A_bin.5	Desulfobacterota_B	WP_012659228	MerA
44A_bin.6	Nitrospinota	WP_012659228	MerA
44A_bin.6	Nitrospinota	WP_012659228	MerA
44A_bin.6	Nitrospinota	WP_011534027	mnxG
44A_bin.6	Nitrospinota	WP_011534027	mnxG
44A_bin.6	Nitrospinota	WP_011534027	mnxG
44A_bin.6	Nitrospinota	WP_012659228	MerA
44A_bin.6	Nitrospinota	NP_250755	PcoA
44A_bin.6	Nitrospinota	ADD75925	CueO
44A_bin.6	Nitrospinota	WP_012659228	MerA
44A_bin.7	KSB1	NP_250755	PcoA
44A_bin.7	KSB1	NP_250755	PcoA
44A_bin.7	KSB1	ADD75925	CueO
44A_bin.7	KSB1	AFK33221	CotA
44A_bin.7	KSB1	WP_012659228	MerA
44A_bin.7	KSB1	AVY91883	AioA
44A_bin.7	KSB1	AVY91883	AioA
44A_bin.8	Proteobacteria	WP_012659228	MerA
44A_bin.8	Proteobacteria	WP_012659228	MerA
44A_bin.8	Proteobacteria	WP_012659228	MerA
44A_bin.8	Proteobacteria	WP_012659228	MerA
44A_bin.8	Proteobacteria	NP_250755	PcoA
44A_bin.9	Gemmatimonadota	WP_012659228	MerA
44A_bin.9	Gemmatimonadota	NP_250755	PcoA
44A_bin.9	Gemmatimonadota	WP_012659228	MerA
44A_bin.9	Gemmatimonadota	WP_012659228	MerA
44A_bin.9	Gemmatimonadota	NP_250755	PcoA
44A_bin.9	Gemmatimonadota	NP_250755	PcoA
44A_bin.9	Gemmatimonadota	ADD75925	CueO
44A_bin.9	Gemmatimonadota	ADD75925	CueO
44A_bin.9	Gemmatimonadota	AFK33221	CotA
45A_bin.1	Proteobacteria	WP_012659228	MerA
45A_bin.1	Proteobacteria	WP_012659228	MerA
45A_bin.1	Proteobacteria	WP_012659228	MerA
45A_bin.1	Proteobacteria	NP_417960	ArsC
45A_bin.1	Proteobacteria	NP_416167	NemA
45A_bin.1	Proteobacteria	NP_416167	NemA
45A_bin.10	Proteobacteria	NP_250755	PcoA
45A_bin.10	Proteobacteria	NP_250755	PcoA
45A_bin.10	Proteobacteria	ADD75925	CueO
45A_bin.10	Proteobacteria	NP_417960	ArsC
45A_bin.10	Proteobacteria	WP_012659228	MerA
45A_bin.10	Proteobacteria	WP_012659228	MerA
45A_bin.10	Proteobacteria	WP_000790334	MerB
45A_bin.10	Proteobacteria	WP_012659228	MerA
45A_bin.10	Proteobacteria	WP_012659228	MerA
45A_bin.10	Proteobacteria	WP_012659228	MerA
45A_bin.11	Methylomirabilota	WP_012659228	MerA
45A_bin.11	Methylomirabilota	AVY91883	AioA
45A_bin.11	Methylomirabilota	NP_250755	PcoA
45A_bin.11	Methylomirabilota	NP_250755	PcoA
45A_bin.11	Methylomirabilota	ADD75925	CueO
45A_bin.11	Methylomirabilota	WP_012659228	MerA
45A_bin.11	Methylomirabilota	WP_000790334	MerB
45A_bin.11	Methylomirabilota	AVK42811	Cyc2
45A_bin.11	Methylomirabilota	WP_012659228	MerA
45A_bin.12	Gemmatimonadota	NP_250755	PcoA
45A_bin.12	Gemmatimonadota	ADD75925	CueO
45A_bin.12	Gemmatimonadota	WP_012659228	MerA
45A_bin.12	Gemmatimonadota	AVY91883	AioA
45A_bin.12	Gemmatimonadota	AVY91883	AioA
45A_bin.12	Gemmatimonadota	NP_416167	NemA
45A_bin.12	Gemmatimonadota	NP_250755	PcoA
45A_bin.12	Gemmatimonadota	ADD75925	CueO
45A_bin.12	Gemmatimonadota	WP_012659228	MerA
45A_bin.12	Gemmatimonadota	NP_250755	PcoA
45A_bin.12	Gemmatimonadota	NP_250755	PcoA
45A_bin.12	Gemmatimonadota	AFK33221	CotA
45A_bin.12	Gemmatimonadota	ADD75925	CueO
45A_bin.12	Gemmatimonadota	NP_250755	PcoA
45A_bin.12	Gemmatimonadota	ADD75925	CueO
45A_bin.12	Gemmatimonadota	AFK33221	CotA
45A_bin.13	Proteobacteria	NP_250755	PcoA
45A_bin.13	Proteobacteria	NP_250755	PcoA
45A_bin.13	Proteobacteria	ADD75925	CueO
45A_bin.13	Proteobacteria	WP_012659228	MerA
45A_bin.13	Proteobacteria	WP_012659228	MerA
45A_bin.13	Proteobacteria	WP_012659228	MerA
45A_bin.13	Proteobacteria	AVY91883	AioA
45A_bin.13	Proteobacteria	WP_012659228	MerA
45A_bin.13	Proteobacteria	WP_012659228	MerA
45A_bin.13	Proteobacteria	WP_012659228	MerA
45A_bin.13	Proteobacteria	WP_012659228	MerA
45A_bin.13	Proteobacteria	WP_012659228	MerA
45A_bin.13	Proteobacteria	WP_012659228	MerA
45A_bin.13	Proteobacteria	WP_012659228	MerA
45A_bin.13	Proteobacteria	NP_416167	NemA
45A_bin.13	Proteobacteria	WP_012659228	MerA
45A_bin.13	Proteobacteria	NP_416167	NemA
45A_bin.13	Proteobacteria	AVY91883	AioA
45A_bin.13	Proteobacteria	AVY91883	AioA
45A_bin.2	Proteobacteria	WP_012659228	MerA
45A_bin.2	Proteobacteria	NP_416167	NemA
45A_bin.2	Proteobacteria	NP_416167	NemA
45A_bin.2	Proteobacteria	AVY91883	AioA
45A_bin.2	Proteobacteria	WP_012659228	MerA
45A_bin.2	Proteobacteria	NP_416167	NemA
45A_bin.2	Proteobacteria	WP_012659228	MerA
45A_bin.2	Proteobacteria	WP_012659228	MerA
45A_bin.2	Proteobacteria	WP_012659228	MerA
45A_bin.2	Proteobacteria	WP_000790334	MerB
45A_bin.2	Proteobacteria	WP_012659228	MerA
45A_bin.2	Proteobacteria	WP_012659228	MerA
45A_bin.2	Proteobacteria	NP_416167	NemA
45A_bin.2	Proteobacteria	AVY91883	AioA
45A_bin.2	Proteobacteria	WP_012659228	MerA
45A_bin.2	Proteobacteria	WP_012659228	MerA
45A_bin.2	Proteobacteria	NP_416167	NemA
45A_bin.3	Proteobacteria	WP_012659228	MerA
45A_bin.3	Proteobacteria	WP_012659228	MerA
45A_bin.3	Proteobacteria	WP_012659228	MerA
45A_bin.3	Proteobacteria	WP_012659228	MerA
45A_bin.3	Proteobacteria	WP_012659228	MerA
45A_bin.3	Proteobacteria	NP_416167	NemA
45A_bin.3	Proteobacteria	WP_012659228	MerA
45A_bin.3	Proteobacteria	WP_012659228	MerA
45A_bin.3	Proteobacteria	AVY91883	AioA
45A_bin.4	Methylomirabilota	WP_000790334	MerB
45A_bin.4	Methylomirabilota	WP_012659228	MerA
45A_bin.4	Methylomirabilota	WP_012659228	MerA
45A_bin.4	Methylomirabilota	WP_012659228	MerA
45A_bin.4	Methylomirabilota	WP_000790334	MerB
45A_bin.4	Methylomirabilota	NP_250755	PcoA
45A_bin.4	Methylomirabilota	ADD75925	CueO
45A_bin.4	Methylomirabilota	AFK33221	CotA
45A_bin.4	Methylomirabilota	NP_250755	PcoA
45A_bin.4	Methylomirabilota	NP_250755	PcoA
45A_bin.4	Methylomirabilota	ADD75925	CueO
45A_bin.4	Methylomirabilota	AFK33221	CotA
45A_bin.4	Methylomirabilota	WP_012659228	MerA
45A_bin.5	Proteobacteria	NP_416167	NemA
45A_bin.5	Proteobacteria	WP_012659228	MerA
45A_bin.5	Proteobacteria	WP_012659228	MerA
45A_bin.5	Proteobacteria	NP_417960	ArsC
45A_bin.6	Acidobacteriota	NP_417960	ArsC
45A_bin.6	Acidobacteriota	WP_012659228	MerA
45A_bin.6	Acidobacteriota	WP_012659228	MerA
45A_bin.6	Acidobacteriota	NP_250755	PcoA
45A_bin.6	Acidobacteriota	NP_250755	PcoA
45A_bin.6	Acidobacteriota	ADD75925	CueO
45A_bin.6	Acidobacteriota	WP_012659228	MerA
45A_bin.6	Acidobacteriota	WP_012659228	MerA
45A_bin.6	Acidobacteriota	AVY91883	AioA
45A_bin.7	Nitrospirota	WP_012659228	MerA
45A_bin.7	Nitrospirota	WP_012659228	MerA
45A_bin.7	Nitrospirota	WP_012659228	MerA
45A_bin.7	Nitrospirota	WP_012659228	MerA
45A_bin.7	Nitrospirota	WP_012659228	MerA
45A_bin.7	Nitrospirota	WP_012659228	MerA
45A_bin.7	Nitrospirota	WP_000790334	MerB
45A_bin.7	Nitrospirota	WP_012659228	MerA
45A_bin.8	Proteobacteria	WP_012659228	MerA
45A_bin.8	Proteobacteria	WP_012659228	MerA
45A_bin.8	Proteobacteria	WP_012659228	MerA
45A_bin.8	Proteobacteria	WP_012659228	MerA
45A_bin.8	Proteobacteria	WP_000790334	MerB
45A_bin.8	Proteobacteria	AVY91883	AioA
45A_bin.8	Proteobacteria	NP_416167	NemA
45A_bin.8	Proteobacteria	AVY91883	AioA
45A_bin.8	Proteobacteria	WP_012659228	MerA
45A_bin.8	Proteobacteria	NP_250755	PcoA
45A_bin.8	Proteobacteria	WP_012659228	MerA
45A_bin.8	Proteobacteria	WP_012659228	MerA
45A_bin.9	Proteobacteria	WP_012659228	MerA
45A_bin.9	Proteobacteria	WP_012659228	MerA
45A_bin.9	Proteobacteria	NP_417960	ArsC
45A_bin.9	Proteobacteria	WP_012659228	MerA
45A_bin.9	Proteobacteria	WP_012659228	MerA
45A_bin.9	Proteobacteria	NP_250755	PcoA
45A_bin.9	Proteobacteria	ADD75925	CueO
45A_bin.9	Proteobacteria	AFK33221	CotA
45A_bin.9	Proteobacteria	WP_012659228	MerA
46A_bin.1	Proteobacteria	AVY91883	AioA
46A_bin.1	Proteobacteria	WP_012659228	MerA
46A_bin.1	Proteobacteria	WP_012659228	MerA
46A_bin.1	Proteobacteria	WP_012659228	MerA
46A_bin.1	Proteobacteria	WP_000790334	MerB
46A_bin.1	Proteobacteria	WP_012659228	MerA
46A_bin.1	Proteobacteria	WP_012659228	MerA
46A_bin.1	Proteobacteria	WP_012659228	MerA
46A_bin.1	Proteobacteria	WP_012659228	MerA
46A_bin.1	Proteobacteria	NP_416167	NemA
46A_bin.1	Proteobacteria	NP_416167	NemA
46A_bin.1	Proteobacteria	WP_012659228	MerA
46A_bin.1	Proteobacteria	NP_416167	NemA
46A_bin.1	Proteobacteria	WP_012659228	MerA
46A_bin.2	Methylomirabilota	WP_012659228	MerA
46A_bin.2	Methylomirabilota	NP_250755	PcoA
46A_bin.2	Methylomirabilota	NP_250755	PcoA
46A_bin.2	Methylomirabilota	ADD75925	CueO
46A_bin.2	Methylomirabilota	WP_012659228	MerA
46A_bin.2	Methylomirabilota	AVY91883	AioA
46A_bin.2	Methylomirabilota	WP_012659228	MerA
46A_bin.2	Methylomirabilota	WP_012659228	MerA
46A_bin.2	Methylomirabilota	WP_012659228	MerA
46A_bin.2	Methylomirabilota	WP_000790334	MerB
46A_bin.3	Proteobacteria	WP_012659228	MerA
46A_bin.3	Proteobacteria	WP_012659228	MerA
46A_bin.3	Proteobacteria	WP_012659228	MerA
46A_bin.3	Proteobacteria	NP_417960	ArsC
46A_bin.3	Proteobacteria	NP_250755	PcoA
46A_bin.3	Proteobacteria	ADD75925	CueO
46A_bin.3	Proteobacteria	AFK33221	CotA
46A_bin.3	Proteobacteria	WP_012659228	MerA
46A_bin.4	Proteobacteria	WP_012659228	MerA
46A_bin.4	Proteobacteria	WP_012659228	MerA
46A_bin.4	Proteobacteria	WP_012659228	MerA
46A_bin.4	Proteobacteria	WP_012659228	MerA
46A_bin.4	Proteobacteria	NP_250755	PcoA
46A_bin.4	Proteobacteria	NP_250755	PcoA
46A_bin.4	Proteobacteria	ADD75925	CueO
46A_bin.4	Proteobacteria	WP_012659228	MerA
46A_bin.4	Proteobacteria	WP_012659228	MerA
46A_bin.4	Proteobacteria	WP_012659228	MerA
46A_bin.5	Nitrospirota	WP_012659228	MerA
46A_bin.5	Nitrospirota	WP_012659228	MerA
46A_bin.5	Nitrospirota	WP_012659228	MerA
46A_bin.5	Nitrospirota	WP_012659228	MerA
46A_bin.5	Nitrospirota	NP_417960	ArsC
46A_bin.5	Nitrospirota	WP_012659228	MerA
46A_bin.5	Nitrospirota	NP_416167	NemA
46A_bin.5	Nitrospirota	WP_000790334	MerB
46A_bin.5	Nitrospirota	NP_250755	PcoA
46A_bin.5	Nitrospirota	NP_416167	NemA
46A_bin.5	Nitrospirota	WP_012659228	MerA
46A_bin.5	Nitrospirota	AVY91883	AioA
46A_bin.6	Proteobacteria	NP_416167	NemA
46A_bin.6	Proteobacteria	NP_250755	PcoA
46A_bin.6	Proteobacteria	ADD75925	CueO
46A_bin.6	Proteobacteria	AFK33221	CotA
46A_bin.6	Proteobacteria	WP_012659228	MerA
46A_bin.6	Proteobacteria	NP_416167	NemA
46A_bin.6	Proteobacteria	NP_417960	ArsC
46A_bin.6	Proteobacteria	WP_012659228	MerA
46A_bin.6	Proteobacteria	WP_012659228	MerA
46A_bin.7	Proteobacteria	WP_012659228	MerA
46A_bin.7	Proteobacteria	WP_012659228	MerA
46A_bin.7	Proteobacteria	AVY91883	AioA
46A_bin.7	Proteobacteria	WP_012659228	MerA
46A_bin.7	Proteobacteria	WP_012659228	MerA
46A_bin.7	Proteobacteria	WP_012659228	MerA
46A_bin.7	Proteobacteria	WP_000790334	MerB
46A_bin.7	Proteobacteria	NP_250755	PcoA
46A_bin.7	Proteobacteria	AVY91883	AioA
46A_bin.8	Proteobacteria	WP_012659228	MerA
46A_bin.8	Proteobacteria	NP_250755	PcoA
46A_bin.8	Proteobacteria	NP_250755	PcoA
46A_bin.8	Proteobacteria	ADD75925	CueO
46A_bin.8	Proteobacteria	AFK33221	CotA
46A_bin.8	Proteobacteria	WP_012659228	MerA
46A_bin.9	Methylomirabilota	WP_012659228	MerA
46A_bin.9	Methylomirabilota	WP_012659228	MerA
46A_bin.9	Methylomirabilota	NP_250755	PcoA
46A_bin.9	Methylomirabilota	ADD75925	CueO
46A_bin.9	Methylomirabilota	AFK33221	CotA
46A_bin.9	Methylomirabilota	NP_250755	PcoA
46A_bin.9	Methylomirabilota	NP_250755	PcoA
46A_bin.9	Methylomirabilota	ADD75925	CueO
46A_bin.9	Methylomirabilota	AFK33221	CotA
46A_bin.9	Methylomirabilota	WP_000790334	MerB
46A_bin.9	Methylomirabilota	WP_012659228	MerA
46A_bin.9	Methylomirabilota	WP_012659228	MerA
46A_bin.9	Methylomirabilota	WP_000790334	MerB
46A_bin.9	Methylomirabilota	NP_250755	PcoA
46A_bin.9	Methylomirabilota	ADD75925	CueO
47A_bin.1	Methylomirabilota	WP_012659228	MerA
47A_bin.1	Methylomirabilota	WP_000790334	MerB
47A_bin.1	Methylomirabilota	NP_250755	PcoA
47A_bin.1	Methylomirabilota	NP_250755	PcoA
47A_bin.1	Methylomirabilota	ADD75925	CueO
47A_bin.1	Methylomirabilota	AFK33221	CotA
47A_bin.1	Methylomirabilota	WP_012659228	MerA
47A_bin.1	Methylomirabilota	NP_250755	PcoA
47A_bin.1	Methylomirabilota	ADD75925	CueO
47A_bin.1	Methylomirabilota	AFK33221	CotA
47A_bin.1	Methylomirabilota	WP_012659228	MerA
47A_bin.1	Methylomirabilota	WP_012659228	MerA
47A_bin.1	Methylomirabilota	WP_000790334	MerB
47A_bin.10	Proteobacteria	WP_012659228	MerA
47A_bin.10	Proteobacteria	NP_417960	ArsC
47A_bin.10	Proteobacteria	WP_012659228	MerA
47A_bin.10	Proteobacteria	WP_012659228	MerA
47A_bin.10	Proteobacteria	NP_250755	PcoA
47A_bin.10	Proteobacteria	NP_250755	PcoA
47A_bin.10	Proteobacteria	ADD75925	CueO
47A_bin.10	Proteobacteria	AFK33221	CotA
47A_bin.10	Proteobacteria	WP_000790334	MerB
47A_bin.10	Proteobacteria	WP_012659228	MerA
47A_bin.10	Proteobacteria	WP_012659228	MerA
47A_bin.11	Methylomirabilota	AVY91883	AioA
47A_bin.11	Methylomirabilota	WP_012659228	MerA
47A_bin.11	Methylomirabilota	AVY91883	AioA
47A_bin.11	Methylomirabilota	WP_012659228	MerA
47A_bin.11	Methylomirabilota	WP_012659228	MerA
47A_bin.11	Methylomirabilota	WP_012659228	MerA
47A_bin.11	Methylomirabilota	WP_012659228	MerA
47A_bin.11	Methylomirabilota	WP_012659228	MerA
47A_bin.12	Proteobacteria	NP_416167	NemA
47A_bin.12	Proteobacteria	WP_012659228	MerA
47A_bin.12	Proteobacteria	WP_012659228	MerA
47A_bin.12	Proteobacteria	NP_417960	ArsC
47A_bin.12	Proteobacteria	WP_012659228	MerA
47A_bin.13	Proteobacteria	WP_012659228	MerA
47A_bin.13	Proteobacteria	WP_000790334	MerB
47A_bin.13	Proteobacteria	WP_012659228	MerA
47A_bin.13	Proteobacteria	NP_416167	NemA
47A_bin.13	Proteobacteria	AVY91883	AioA
47A_bin.13	Proteobacteria	WP_012659228	MerA
47A_bin.13	Proteobacteria	AVY91883	AioA
47A_bin.13	Proteobacteria	WP_012659228	MerA
47A_bin.13	Proteobacteria	WP_012659228	MerA
47A_bin.13	Proteobacteria	WP_012659228	MerA
47A_bin.13	Proteobacteria	WP_012659228	MerA
47A_bin.13	Proteobacteria	WP_012659228	MerA
47A_bin.13	Proteobacteria	WP_012659228	MerA
47A_bin.14	Acidobacteriota	AVY91883	AioA
47A_bin.14	Acidobacteriota	AVY91883	AioA
47A_bin.14	Acidobacteriota	WP_012659228	MerA
47A_bin.14	Acidobacteriota	NP_417960	ArsC
47A_bin.14	Acidobacteriota	WP_012659228	MerA
47A_bin.14	Acidobacteriota	WP_012659228	MerA
47A_bin.14	Acidobacteriota	ADD75925	CueO
47A_bin.14	Acidobacteriota	AFK33221	CotA
47A_bin.14	Acidobacteriota	NP_250755	PcoA
47A_bin.14	Acidobacteriota	AVY91883	AioA
47A_bin.2	Proteobacteria	WP_012659228	MerA
47A_bin.2	Proteobacteria	WP_012659228	MerA
47A_bin.2	Proteobacteria	WP_012659228	MerA
47A_bin.2	Proteobacteria	WP_012659228	MerA
47A_bin.2	Proteobacteria	NP_417960	ArsC
47A_bin.2	Proteobacteria	NP_250755	PcoA
47A_bin.2	Proteobacteria	NP_250755	PcoA
47A_bin.2	Proteobacteria	ADD75925	CueO
47A_bin.2	Proteobacteria	AFK33221	CotA
47A_bin.2	Proteobacteria	WP_012659228	MerA
47A_bin.2	Proteobacteria	WP_012659228	MerA
47A_bin.3	Nitrospirota	AVY91883	AioA
47A_bin.3	Nitrospirota	WP_012659228	MerA
47A_bin.3	Nitrospirota	WP_012659228	MerA
47A_bin.3	Nitrospirota	NP_416167	NemA
47A_bin.3	Nitrospirota	WP_012659228	MerA
47A_bin.3	Nitrospirota	AVK42811	Cyc2
47A_bin.3	Nitrospirota	WP_000790334	MerB
47A_bin.3	Nitrospirota	WP_000790334	MerB
47A_bin.3	Nitrospirota	WP_012659228	MerA
47A_bin.3	Nitrospirota	WP_012659228	MerA
47A_bin.3	Nitrospirota	NP_417960	ArsC
47A_bin.3	Nitrospirota	WP_012659228	MerA
47A_bin.3	Nitrospirota	WP_012659228	MerA
47A_bin.3	Nitrospirota	NP_416167	NemA
47A_bin.4	Desulfobacterota_B	WP_012659228	MerA
47A_bin.4	Desulfobacterota_B	AVY91883	AioA
47A_bin.4	Desulfobacterota_B	WP_012659228	MerA
47A_bin.4	Desulfobacterota_B	WP_012659228	MerA
47A_bin.4	Desulfobacterota_B	WP_011338712	ChrR
47A_bin.4	Desulfobacterota_B	WP_012659228	MerA
47A_bin.4	Desulfobacterota_B	WP_012659228	MerA
47A_bin.4	Desulfobacterota_B	WP_012659228	MerA
47A_bin.4	Desulfobacterota_B	WP_012659228	MerA
47A_bin.4	Desulfobacterota_B	WP_012659228	MerA
47A_bin.5	Proteobacteria	AVY91883	AioA
47A_bin.5	Proteobacteria	NP_416167	NemA
47A_bin.5	Proteobacteria	AVY91883	AioA
47A_bin.5	Proteobacteria	WP_012659228	MerA
47A_bin.5	Proteobacteria	AVY91883	AioA
47A_bin.5	Proteobacteria	NP_416167	NemA
47A_bin.5	Proteobacteria	WP_012659228	MerA
47A_bin.5	Proteobacteria	NP_416167	NemA
47A_bin.5	Proteobacteria	WP_012659228	MerA
47A_bin.5	Proteobacteria	WP_012659228	MerA
47A_bin.5	Proteobacteria	NP_416167	NemA
47A_bin.5	Proteobacteria	WP_012659228	MerA
47A_bin.5	Proteobacteria	NP_416167	NemA
47A_bin.5	Proteobacteria	NP_416167	NemA
47A_bin.5	Proteobacteria	WP_012659228	MerA
47A_bin.5	Proteobacteria	NP_416167	NemA
47A_bin.6	Proteobacteria	AVY91883	AioA
47A_bin.6	Proteobacteria	WP_012659228	MerA
47A_bin.6	Proteobacteria	WP_012659228	MerA
47A_bin.6	Proteobacteria	WP_012659228	MerA
47A_bin.6	Proteobacteria	WP_012659228	MerA
47A_bin.6	Proteobacteria	WP_012659228	MerA
47A_bin.6	Proteobacteria	NP_250755	PcoA
47A_bin.6	Proteobacteria	ADD75925	CueO
47A_bin.6	Proteobacteria	AVY91883	AioA
47A_bin.6	Proteobacteria	WP_012659228	MerA
47A_bin.6	Proteobacteria	WP_012659228	MerA
47A_bin.6	Proteobacteria	WP_012659228	MerA
47A_bin.6	Proteobacteria	WP_012659228	MerA
47A_bin.7	Proteobacteria	WP_012659228	MerA
47A_bin.7	Proteobacteria	NP_416167	NemA
47A_bin.7	Proteobacteria	WP_012659228	MerA
47A_bin.7	Proteobacteria	NP_417960	ArsC
47A_bin.7	Proteobacteria	WP_012659228	MerA
47A_bin.7	Proteobacteria	WP_012659228	MerA
47A_bin.7	Proteobacteria	WP_012659228	MerA
47A_bin.8	Nitrospinota	NP_250755	PcoA
47A_bin.8	Nitrospinota	ADD75925	CueO
47A_bin.8	Nitrospinota	WP_000790334	MerB
47A_bin.8	Nitrospinota	WP_012659228	MerA
47A_bin.8	Nitrospinota	WP_012659228	MerA
47A_bin.8	Nitrospinota	WP_011534027	mnxG
47A_bin.9	Proteobacteria	AVY91883	AioA
47A_bin.9	Proteobacteria	WP_012659228	MerA
47A_bin.9	Proteobacteria	WP_012659228	MerA
47A_bin.9	Proteobacteria	NP_416167	NemA
47A_bin.9	Proteobacteria	WP_012659228	MerA
47A_bin.9	Proteobacteria	WP_012659228	MerA
47A_bin.9	Proteobacteria	WP_012659228	MerA
47A_bin.9	Proteobacteria	NP_416167	NemA
47A_bin.9	Proteobacteria	WP_012659228	MerA
47A_bin.9	Proteobacteria	WP_012659228	MerA
47A_bin.9	Proteobacteria	NP_416167	NemA
47A_bin.9	Proteobacteria	WP_012659228	MerA
47A_bin.9	Proteobacteria	WP_000790334	MerB
47A_bin.9	Proteobacteria	AVY91883	AioA

## Sheet: S6
Table S6. TCDB's annotation information of MAGs from deep-sea nodule-area nodule samples
MAGs ID	MAG's classificatioin at the phylum level	TCDB family	Function description	Protein name
9CJW_47	Proteobacteria	2.A.59	The Arsenical Resistance-3 (ACR3) Family	ACR3
ROV5_28	Proteobacteria	2.A.59	The Arsenical Resistance-3 (ACR3) Family	ACR3
ROV5_30	Proteobacteria	2.A.59	The Arsenical Resistance-3 (ACR3) Family	ACR3
ROV5_66	Proteobacteria	2.A.59	The Arsenical Resistance-3 (ACR3) Family	ACR3
ROV5_82	Bacteroidota	2.A.59	The Arsenical Resistance-3 (ACR3) Family	ACR3
9CJW_55	Unclassified	2.A.119	The Organo-Arsenical Exporter (ArsP) Family	ArsP
ROV5_34	Proteobacteria	2.A.119	The Organo-Arsenical Exporter (ArsP) Family	ArsP
ROV5_40	Proteobacteria	2.A.119	The Organo-Arsenical Exporter (ArsP) Family	ArsP
ROV5_48	Bacteroidota	2.A.119	The Organo-Arsenical Exporter (ArsP) Family	ArsP
ROV5_84	Planctomycetota	2.A.119	The Organo-Arsenical Exporter (ArsP) Family	ArsP
9CJW_14	Proteobacteria	9.B.62	The Copper Resistance (CopD) Family	CopD
9CJW_17	Chloroflexota	9.B.62	The Copper Resistance (CopD) Family	CopD
9CJW_22	Proteobacteria	9.B.62	The Copper Resistance (CopD) Family	CopD
9CJW_30	Gemmatimonadota	9.B.62	The Copper Resistance (CopD) Family	CopD
9CJW_30	Gemmatimonadota	9.B.62	The Copper Resistance (CopD) Family	CopD
9CJW_34	Proteobacteria	9.B.62	The Copper Resistance (CopD) Family	CopD
9CJW_35	Chloroflexota	9.B.62	The Copper Resistance (CopD) Family	CopD
9CJW_44	Acidobacteriota	9.B.62	The Copper Resistance (CopD) Family	CopD
9CJW_46	Proteobacteria	9.B.62	The Copper Resistance (CopD) Family	CopD
9CJW_47	Proteobacteria	9.B.62	The Copper Resistance (CopD) Family	CopD
9CJW_48	Proteobacteria	9.B.62	The Copper Resistance (CopD) Family	CopD
9CJW_48	Proteobacteria	9.B.62	The Copper Resistance (CopD) Family	CopD
9CJW_4	Nitrospirota	9.B.62	The Copper Resistance (CopD) Family	CopD
9CJW_66	Gemmatimonadota	9.B.62	The Copper Resistance (CopD) Family	CopD
9CJW_66	Gemmatimonadota	9.B.62	The Copper Resistance (CopD) Family	CopD
9CJW_6	Proteobacteria	9.B.62	The Copper Resistance (CopD) Family	CopD
9CJW_6	Proteobacteria	9.B.62	The Copper Resistance (CopD) Family	CopD
9CJW_6	Proteobacteria	9.B.62	The Copper Resistance (CopD) Family	CopD
9CJW_6	Proteobacteria	9.B.62	The Copper Resistance (CopD) Family	CopD
9CJW_78	Proteobacteria	9.B.62	The Copper Resistance (CopD) Family	CopD
9CJW_79	Gemmatimonadota	9.B.62	The Copper Resistance (CopD) Family	CopD
9CJW_80	UBA10199	9.B.62	The Copper Resistance (CopD) Family	CopD
9CJW_89	Gemmatimonadota	9.B.62	The Copper Resistance (CopD) Family	CopD
9CJW_8	Acidobacteriota	9.B.62	The Copper Resistance (CopD) Family	CopD
ROV5_105	Proteobacteria	9.B.62	The Copper Resistance (CopD) Family	CopD
ROV5_1	Gemmatimonadota	9.B.62	The Copper Resistance (CopD) Family	CopD
ROV5_20	Proteobacteria	9.B.62	The Copper Resistance (CopD) Family	CopD
ROV5_20	Proteobacteria	9.B.62	The Copper Resistance (CopD) Family	CopD
ROV5_25	Desulfobacterota_D	9.B.62	The Copper Resistance (CopD) Family	CopD
ROV5_32	Gemmatimonadota	9.B.62	The Copper Resistance (CopD) Family	CopD
ROV5_52	Acidobacteriota	9.B.62	The Copper Resistance (CopD) Family	CopD
ROV5_58	Proteobacteria	9.B.62	The Copper Resistance (CopD) Family	CopD
ROV5_58	Proteobacteria	9.B.62	The Copper Resistance (CopD) Family	CopD
ROV5_59	Proteobacteria	9.B.62	The Copper Resistance (CopD) Family	CopD
ROV5_59	Proteobacteria	9.B.62	The Copper Resistance (CopD) Family	CopD
ROV5_64	Proteobacteria	9.B.62	The Copper Resistance (CopD) Family	CopD
ROV5_66	Proteobacteria	9.B.62	The Copper Resistance (CopD) Family	CopD
ROV5_66	Proteobacteria	9.B.62	The Copper Resistance (CopD) Family	CopD
ROV5_69	Proteobacteria	9.B.62	The Copper Resistance (CopD) Family	CopD
ROV5_69	Proteobacteria	9.B.62	The Copper Resistance (CopD) Family	CopD
ROV5_76	Proteobacteria	9.B.62	The Copper Resistance (CopD) Family	CopD
ROV5_84	Planctomycetota	9.B.62	The Copper Resistance (CopD) Family	CopD
ROV5_87	Desulfobacterota_B	9.B.62	The Copper Resistance (CopD) Family	CopD
ROV5_93	Thermoproteota	9.B.62	The Copper Resistance (CopD) Family	CopD
9CJW_2	Proteobacteria	1.B.76	The Copper Resistance Putative Porin (CopB) Family	CopB
9CJW_30	Gemmatimonadota	1.B.76	The Copper Resistance Putative Porin (CopB) Family	CopB
9CJW_33	KSB1	1.B.76	The Copper Resistance Putative Porin (CopB) Family	CopB
9CJW_34	Proteobacteria	1.B.76	The Copper Resistance Putative Porin (CopB) Family	CopB
9CJW_44	Acidobacteriota	1.B.76	The Copper Resistance Putative Porin (CopB) Family	CopB
9CJW_45	Thermoproteota	1.B.76	The Copper Resistance Putative Porin (CopB) Family	CopB
9CJW_47	Proteobacteria	1.B.76	The Copper Resistance Putative Porin (CopB) Family	CopB
9CJW_48	Proteobacteria	1.B.76	The Copper Resistance Putative Porin (CopB) Family	CopB
9CJW_66	Gemmatimonadota	1.B.76	The Copper Resistance Putative Porin (CopB) Family	CopB
9CJW_66	Gemmatimonadota	1.B.76	The Copper Resistance Putative Porin (CopB) Family	CopB
9CJW_78	Proteobacteria	1.B.76	The Copper Resistance Putative Porin (CopB) Family	CopB
9CJW_8	Acidobacteriota	1.B.76	The Copper Resistance Putative Porin (CopB) Family	CopB
9DJH_18	Acidobacteriota	1.B.76	The Copper Resistance Putative Porin (CopB) Family	CopB
ROV5_20	Proteobacteria	1.B.76	The Copper Resistance Putative Porin (CopB) Family	CopB
ROV5_37	Proteobacteria	1.B.76	The Copper Resistance Putative Porin (CopB) Family	CopB
ROV5_44	Thermoproteota	1.B.76	The Copper Resistance Putative Porin (CopB) Family	CopB
ROV5_53	Acidobacteriota	1.B.76	The Copper Resistance Putative Porin (CopB) Family	CopB
ROV5_58	Proteobacteria	1.B.76	The Copper Resistance Putative Porin (CopB) Family	CopB
ROV5_66	Proteobacteria	1.B.76	The Copper Resistance Putative Porin (CopB) Family	CopB
9CJW_11	Proteobacteria	9.A.8	The Ferrous Iron Uptake (FeoB) Family	FeoB
9CJW_12	Proteobacteria	9.A.8	The Ferrous Iron Uptake (FeoB) Family	FeoB
9CJW_13	Acidobacteriota	9.A.8	The Ferrous Iron Uptake (FeoB) Family	FeoB
9CJW_14	Proteobacteria	9.A.8	The Ferrous Iron Uptake (FeoB) Family	FeoB
9CJW_21	Planctomycetota	9.A.8	The Ferrous Iron Uptake (FeoB) Family	FeoB
9CJW_22	Proteobacteria	9.A.8	The Ferrous Iron Uptake (FeoB) Family	FeoB
9CJW_22	Proteobacteria	9.A.8	The Ferrous Iron Uptake (FeoB) Family	FeoB
9CJW_28	Proteobacteria	9.A.8	The Ferrous Iron Uptake (FeoB) Family	FeoB
9CJW_28	Proteobacteria	9.A.8	The Ferrous Iron Uptake (FeoB) Family	FeoB
9CJW_2	Proteobacteria	9.A.8	The Ferrous Iron Uptake (FeoB) Family	FeoB
9CJW_33	KSB1	9.A.8	The Ferrous Iron Uptake (FeoB) Family	FeoB
9CJW_33	KSB1	9.A.8	The Ferrous Iron Uptake (FeoB) Family	FeoB
9CJW_33	KSB1	9.A.8	The Ferrous Iron Uptake (FeoB) Family	FeoB
9CJW_33	KSB1	9.A.8	The Ferrous Iron Uptake (FeoB) Family	FeoB
9CJW_42	Nitrospirota	9.A.8	The Ferrous Iron Uptake (FeoB) Family	FeoB
9CJW_43	Bacteroidota	9.A.8	The Ferrous Iron Uptake (FeoB) Family	FeoB
9CJW_44	Acidobacteriota	9.A.8	The Ferrous Iron Uptake (FeoB) Family	FeoB
9CJW_47	Proteobacteria	9.A.8	The Ferrous Iron Uptake (FeoB) Family	FeoB
9CJW_49	Hydrogenedentota	9.A.8	The Ferrous Iron Uptake (FeoB) Family	FeoB
9CJW_4	Nitrospirota	9.A.8	The Ferrous Iron Uptake (FeoB) Family	FeoB
9CJW_55	Unclassified	9.A.8	The Ferrous Iron Uptake (FeoB) Family	FeoB
9CJW_58	Gemmatimonadota	9.A.8	The Ferrous Iron Uptake (FeoB) Family	FeoB
9CJW_58	Gemmatimonadota	9.A.8	The Ferrous Iron Uptake (FeoB) Family	FeoB
9CJW_5	Proteobacteria	9.A.8	The Ferrous Iron Uptake (FeoB) Family	FeoB
9CJW_61	Myxococcota_A	9.A.8	The Ferrous Iron Uptake (FeoB) Family	FeoB
9CJW_63	Myxococcota_A	9.A.8	The Ferrous Iron Uptake (FeoB) Family	FeoB
9CJW_64	Proteobacteria	9.A.8	The Ferrous Iron Uptake (FeoB) Family	FeoB
9CJW_65	Acidobacteriota	9.A.8	The Ferrous Iron Uptake (FeoB) Family	FeoB
9CJW_68	Actinobacteriota	9.A.8	The Ferrous Iron Uptake (FeoB) Family	FeoB
9CJW_70	Proteobacteria	9.A.8	The Ferrous Iron Uptake (FeoB) Family	FeoB
9CJW_76	Methylomirabilota	9.A.8	The Ferrous Iron Uptake (FeoB) Family	FeoB
9CJW_78	Proteobacteria	9.A.8	The Ferrous Iron Uptake (FeoB) Family	FeoB
9CJW_79	Gemmatimonadota	9.A.8	The Ferrous Iron Uptake (FeoB) Family	FeoB
9CJW_80	UBA10199	9.A.8	The Ferrous Iron Uptake (FeoB) Family	FeoB
9CJW_80	UBA10199	9.A.8	The Ferrous Iron Uptake (FeoB) Family	FeoB
9CJW_87	Gemmatimonadota	9.A.8	The Ferrous Iron Uptake (FeoB) Family	FeoB
9CJW_89	Gemmatimonadota	9.A.8	The Ferrous Iron Uptake (FeoB) Family	FeoB
9CJW_89	Gemmatimonadota	9.A.8	The Ferrous Iron Uptake (FeoB) Family	FeoB
9CJW_91	Proteobacteria	9.A.8	The Ferrous Iron Uptake (FeoB) Family	FeoB
9CJW_94	Proteobacteria	9.A.8	The Ferrous Iron Uptake (FeoB) Family	FeoB
9CJW_94	Proteobacteria	9.A.8	The Ferrous Iron Uptake (FeoB) Family	FeoB
9CJW_9	KSB1	9.A.8	The Ferrous Iron Uptake (FeoB) Family	FeoB
9CJW_9	KSB1	9.A.8	The Ferrous Iron Uptake (FeoB) Family	FeoB
9DJH_14	Proteobacteria	9.A.8	The Ferrous Iron Uptake (FeoB) Family	FeoB
9DJH_15	Proteobacteria	9.A.8	The Ferrous Iron Uptake (FeoB) Family	FeoB
9DJH_18	Acidobacteriota	9.A.8	The Ferrous Iron Uptake (FeoB) Family	FeoB
9DJH_22	Proteobacteria	9.A.8	The Ferrous Iron Uptake (FeoB) Family	FeoB
9DJH_2	Desulfobacterota_B	9.A.8	The Ferrous Iron Uptake (FeoB) Family	FeoB
ROV5_12	Proteobacteria	9.A.8	The Ferrous Iron Uptake (FeoB) Family	FeoB
ROV5_15	Nitrospirota	9.A.8	The Ferrous Iron Uptake (FeoB) Family	FeoB
ROV5_18	Gemmatimonadota	9.A.8	The Ferrous Iron Uptake (FeoB) Family	FeoB
ROV5_1	Gemmatimonadota	9.A.8	The Ferrous Iron Uptake (FeoB) Family	FeoB
ROV5_21	Proteobacteria	9.A.8	The Ferrous Iron Uptake (FeoB) Family	FeoB
ROV5_23	Proteobacteria	9.A.8	The Ferrous Iron Uptake (FeoB) Family	FeoB
ROV5_23	Proteobacteria	9.A.8	The Ferrous Iron Uptake (FeoB) Family	FeoB
ROV5_24	Proteobacteria	9.A.8	The Ferrous Iron Uptake (FeoB) Family	FeoB
ROV5_28	Proteobacteria	9.A.8	The Ferrous Iron Uptake (FeoB) Family	FeoB
ROV5_33	Proteobacteria	9.A.8	The Ferrous Iron Uptake (FeoB) Family	FeoB
ROV5_35	Nitrospirota	9.A.8	The Ferrous Iron Uptake (FeoB) Family	FeoB
ROV5_3	Proteobacteria	9.A.8	The Ferrous Iron Uptake (FeoB) Family	FeoB
ROV5_45	Proteobacteria	9.A.8	The Ferrous Iron Uptake (FeoB) Family	FeoB
ROV5_45	Proteobacteria	9.A.8	The Ferrous Iron Uptake (FeoB) Family	FeoB
ROV5_47	Gemmatimonadota	9.A.8	The Ferrous Iron Uptake (FeoB) Family	FeoB
ROV5_48	Bacteroidota	9.A.8	The Ferrous Iron Uptake (FeoB) Family	FeoB
ROV5_4	Methylomirabilota	9.A.8	The Ferrous Iron Uptake (FeoB) Family	FeoB
ROV5_50	Proteobacteria	9.A.8	The Ferrous Iron Uptake (FeoB) Family	FeoB
ROV5_53	Acidobacteriota	9.A.8	The Ferrous Iron Uptake (FeoB) Family	FeoB
ROV5_54	Proteobacteria	9.A.8	The Ferrous Iron Uptake (FeoB) Family	FeoB
ROV5_58	Proteobacteria	9.A.8	The Ferrous Iron Uptake (FeoB) Family	FeoB
ROV5_58	Proteobacteria	9.A.8	The Ferrous Iron Uptake (FeoB) Family	FeoB
ROV5_58	Proteobacteria	9.A.8	The Ferrous Iron Uptake (FeoB) Family	FeoB
ROV5_59	Proteobacteria	9.A.8	The Ferrous Iron Uptake (FeoB) Family	FeoB
ROV5_6	Desulfobacterota_B	9.A.8	The Ferrous Iron Uptake (FeoB) Family	FeoB
ROV5_72	Proteobacteria	9.A.8	The Ferrous Iron Uptake (FeoB) Family	FeoB
ROV5_82	Bacteroidota	9.A.8	The Ferrous Iron Uptake (FeoB) Family	FeoB
ROV5_84	Planctomycetota	9.A.8	The Ferrous Iron Uptake (FeoB) Family	FeoB
ROV5_94	Proteobacteria	9.A.8	The Ferrous Iron Uptake (FeoB) Family	FeoB
ROV5_94	Proteobacteria	9.A.8	The Ferrous Iron Uptake (FeoB) Family	FeoB
9CJW_2	Proteobacteria	8.A.105	The Multi-Copper-containing Ferroxidase (MCFO) Family	MCFO
9CJW_30	Gemmatimonadota	8.A.105	The Multi-Copper-containing Ferroxidase (MCFO) Family	MCFO
9CJW_49	Hydrogenedentota	8.A.105	The Multi-Copper-containing Ferroxidase (MCFO) Family	MCFO
9CJW_58	Gemmatimonadota	8.A.105	The Multi-Copper-containing Ferroxidase (MCFO) Family	MCFO
9CJW_58	Gemmatimonadota	8.A.105	The Multi-Copper-containing Ferroxidase (MCFO) Family	MCFO
ROV5_108	Actinobacteriota	8.A.105	The Multi-Copper-containing Ferroxidase (MCFO) Family	MCFO
ROV5_34	Proteobacteria	8.A.105	The Multi-Copper-containing Ferroxidase (MCFO) Family	MCFO
9CJW_12	Proteobacteria	2.A.89	The Vacuolar Iron Transporter (VIT) Family	VIT
9CJW_20	Thermoproteota	2.A.89	The Vacuolar Iron Transporter (VIT) Family	VIT
9CJW_20	Thermoproteota	2.A.89	The Vacuolar Iron Transporter (VIT) Family	VIT
9CJW_21	Planctomycetota	2.A.89	The Vacuolar Iron Transporter (VIT) Family	VIT
9CJW_22	Proteobacteria	2.A.89	The Vacuolar Iron Transporter (VIT) Family	VIT
9CJW_23	Acidobacteriota	2.A.89	The Vacuolar Iron Transporter (VIT) Family	VIT
9CJW_35	Chloroflexota	2.A.89	The Vacuolar Iron Transporter (VIT) Family	VIT
9CJW_40	Thermoproteota	2.A.89	The Vacuolar Iron Transporter (VIT) Family	VIT
9CJW_43	Bacteroidota	2.A.89	The Vacuolar Iron Transporter (VIT) Family	VIT
9CJW_56	Desulfobacterota_D	2.A.89	The Vacuolar Iron Transporter (VIT) Family	VIT
9CJW_60	Chloroflexota	2.A.89	The Vacuolar Iron Transporter (VIT) Family	VIT
9CJW_66	Gemmatimonadota	2.A.89	The Vacuolar Iron Transporter (VIT) Family	VIT
9CJW_68	Actinobacteriota	2.A.89	The Vacuolar Iron Transporter (VIT) Family	VIT
9CJW_6	Proteobacteria	2.A.89	The Vacuolar Iron Transporter (VIT) Family	VIT
9CJW_6	Proteobacteria	2.A.89	The Vacuolar Iron Transporter (VIT) Family	VIT
9CJW_78	Proteobacteria	2.A.89	The Vacuolar Iron Transporter (VIT) Family	VIT
9CJW_8	Acidobacteriota	2.A.89	The Vacuolar Iron Transporter (VIT) Family	VIT
9DJH_14	Proteobacteria	2.A.89	The Vacuolar Iron Transporter (VIT) Family	VIT
9DJH_6	Thermoproteota	2.A.89	The Vacuolar Iron Transporter (VIT) Family	VIT
ROV5_107	Actinobacteriota	2.A.89	The Vacuolar Iron Transporter (VIT) Family	VIT
ROV5_10	Nitrospirota	2.A.89	The Vacuolar Iron Transporter (VIT) Family	VIT
ROV5_12	Proteobacteria	2.A.89	The Vacuolar Iron Transporter (VIT) Family	VIT
ROV5_17	Tectomicrobia	2.A.89	The Vacuolar Iron Transporter (VIT) Family	VIT
ROV5_20	Proteobacteria	2.A.89	The Vacuolar Iron Transporter (VIT) Family	VIT
ROV5_21	Proteobacteria	2.A.89	The Vacuolar Iron Transporter (VIT) Family	VIT
ROV5_37	Proteobacteria	2.A.89	The Vacuolar Iron Transporter (VIT) Family	VIT
ROV5_3	Proteobacteria	2.A.89	The Vacuolar Iron Transporter (VIT) Family	VIT
ROV5_62	Chloroflexota	2.A.89	The Vacuolar Iron Transporter (VIT) Family	VIT
ROV5_67	Desulfobacterota_D	2.A.89	The Vacuolar Iron Transporter (VIT) Family	VIT
ROV5_6	Desulfobacterota_B	2.A.89	The Vacuolar Iron Transporter (VIT) Family	VIT
ROV5_84	Planctomycetota	2.A.89	The Vacuolar Iron Transporter (VIT) Family	VIT
ROV5_91	Thermoproteota	2.A.89	The Vacuolar Iron Transporter (VIT) Family	VIT
ROV5_93	Thermoproteota	2.A.89	The Vacuolar Iron Transporter (VIT) Family	VIT
ROV5_9	Proteobacteria	2.A.89	The Vacuolar Iron Transporter (VIT) Family	VIT
9CJW_12	Proteobacteria	1.A.72	The Mercuric Ion Pore (Mer) Superfamily	Mer
9CJW_23	Acidobacteriota	1.A.72	The Mercuric Ion Pore (Mer) Superfamily	Mer
9CJW_29	Proteobacteria	1.A.72	The Mercuric Ion Pore (Mer) Superfamily	Mer
9CJW_34	Proteobacteria	1.A.72	The Mercuric Ion Pore (Mer) Superfamily	Mer
9CJW_42	Nitrospirota	1.A.72	The Mercuric Ion Pore (Mer) Superfamily	Mer
9CJW_43	Bacteroidota	1.A.72	The Mercuric Ion Pore (Mer) Superfamily	Mer
9CJW_46	Proteobacteria	1.A.72	The Mercuric Ion Pore (Mer) Superfamily	Mer
9CJW_47	Proteobacteria	1.A.72	The Mercuric Ion Pore (Mer) Superfamily	Mer
9CJW_47	Proteobacteria	1.A.72	The Mercuric Ion Pore (Mer) Superfamily	Mer
9CJW_4	Nitrospirota	1.A.72	The Mercuric Ion Pore (Mer) Superfamily	Mer
9CJW_55	Unclassified	1.A.72	The Mercuric Ion Pore (Mer) Superfamily	Mer
9CJW_56	Desulfobacterota_D	1.A.72	The Mercuric Ion Pore (Mer) Superfamily	Mer
9CJW_58	Gemmatimonadota	1.A.72	The Mercuric Ion Pore (Mer) Superfamily	Mer
9CJW_58	Gemmatimonadota	1.A.72	The Mercuric Ion Pore (Mer) Superfamily	Mer
9CJW_66	Gemmatimonadota	1.A.72	The Mercuric Ion Pore (Mer) Superfamily	Mer
9CJW_67	Acidobacteriota	1.A.72	The Mercuric Ion Pore (Mer) Superfamily	Mer
9CJW_73	Methylomirabilota	1.A.72	The Mercuric Ion Pore (Mer) Superfamily	Mer
9CJW_74	Proteobacteria	1.A.72	The Mercuric Ion Pore (Mer) Superfamily	Mer
9CJW_74	Proteobacteria	1.A.72	The Mercuric Ion Pore (Mer) Superfamily	Mer
9CJW_89	Gemmatimonadota	1.A.72	The Mercuric Ion Pore (Mer) Superfamily	Mer
9CJW_91	Proteobacteria	1.A.72	The Mercuric Ion Pore (Mer) Superfamily	Mer
9CJW_94	Proteobacteria	1.A.72	The Mercuric Ion Pore (Mer) Superfamily	Mer
9DJH_14	Proteobacteria	1.A.72	The Mercuric Ion Pore (Mer) Superfamily	Mer
9DJH_15	Proteobacteria	1.A.72	The Mercuric Ion Pore (Mer) Superfamily	Mer
9DJH_15	Proteobacteria	1.A.72	The Mercuric Ion Pore (Mer) Superfamily	Mer
9DJH_15	Proteobacteria	1.A.72	The Mercuric Ion Pore (Mer) Superfamily	Mer
9DJH_18	Acidobacteriota	1.A.72	The Mercuric Ion Pore (Mer) Superfamily	Mer
9DJH_22	Proteobacteria	1.A.72	The Mercuric Ion Pore (Mer) Superfamily	Mer
9DJH_8	Proteobacteria	1.A.72	The Mercuric Ion Pore (Mer) Superfamily	Mer
ROV5_17	Tectomicrobia	1.A.72	The Mercuric Ion Pore (Mer) Superfamily	Mer
ROV5_28	Proteobacteria	1.A.72	The Mercuric Ion Pore (Mer) Superfamily	Mer
ROV5_30	Proteobacteria	1.A.72	The Mercuric Ion Pore (Mer) Superfamily	Mer
ROV5_3	Proteobacteria	1.A.72	The Mercuric Ion Pore (Mer) Superfamily	Mer
ROV5_40	Proteobacteria	1.A.72	The Mercuric Ion Pore (Mer) Superfamily	Mer
ROV5_4	Methylomirabilota	1.A.72	The Mercuric Ion Pore (Mer) Superfamily	Mer
ROV5_69	Proteobacteria	1.A.72	The Mercuric Ion Pore (Mer) Superfamily	Mer
ROV5_72	Proteobacteria	1.A.72	The Mercuric Ion Pore (Mer) Superfamily	Mer
ROV5_81	Proteobacteria	1.A.72	The Mercuric Ion Pore (Mer) Superfamily	Mer
ROV5_87	Desulfobacterota_B	1.A.72	The Mercuric Ion Pore (Mer) Superfamily	Mer
9CJW_13	Acidobacteriota	2.A.55	The Metal Ion (Mn2+-iron) Transporter (Nramp) Family	Nramp
9CJW_21	Planctomycetota	2.A.55	The Metal Ion (Mn2+-iron) Transporter (Nramp) Family	Nramp
9CJW_23	Acidobacteriota	2.A.55	The Metal Ion (Mn2+-iron) Transporter (Nramp) Family	Nramp
9CJW_23	Acidobacteriota	2.A.55	The Metal Ion (Mn2+-iron) Transporter (Nramp) Family	Nramp
9CJW_30	Gemmatimonadota	2.A.55	The Metal Ion (Mn2+-iron) Transporter (Nramp) Family	Nramp
9CJW_30	Gemmatimonadota	2.A.55	The Metal Ion (Mn2+-iron) Transporter (Nramp) Family	Nramp
9CJW_30	Gemmatimonadota	2.A.55	The Metal Ion (Mn2+-iron) Transporter (Nramp) Family	Nramp
9CJW_33	KSB1	2.A.55	The Metal Ion (Mn2+-iron) Transporter (Nramp) Family	Nramp
9CJW_33	KSB1	2.A.55	The Metal Ion (Mn2+-iron) Transporter (Nramp) Family	Nramp
9CJW_44	Acidobacteriota	2.A.55	The Metal Ion (Mn2+-iron) Transporter (Nramp) Family	Nramp
9CJW_49	Hydrogenedentota	2.A.55	The Metal Ion (Mn2+-iron) Transporter (Nramp) Family	Nramp
9CJW_49	Hydrogenedentota	2.A.55	The Metal Ion (Mn2+-iron) Transporter (Nramp) Family	Nramp
9CJW_58	Gemmatimonadota	2.A.55	The Metal Ion (Mn2+-iron) Transporter (Nramp) Family	Nramp
9CJW_5	Proteobacteria	2.A.55	The Metal Ion (Mn2+-iron) Transporter (Nramp) Family	Nramp
9CJW_63	Myxococcota_A	2.A.55	The Metal Ion (Mn2+-iron) Transporter (Nramp) Family	Nramp
9CJW_63	Myxococcota_A	2.A.55	The Metal Ion (Mn2+-iron) Transporter (Nramp) Family	Nramp
9CJW_65	Acidobacteriota	2.A.55	The Metal Ion (Mn2+-iron) Transporter (Nramp) Family	Nramp
9CJW_67	Acidobacteriota	2.A.55	The Metal Ion (Mn2+-iron) Transporter (Nramp) Family	Nramp
9CJW_67	Acidobacteriota	2.A.55	The Metal Ion (Mn2+-iron) Transporter (Nramp) Family	Nramp
9CJW_73	Methylomirabilota	2.A.55	The Metal Ion (Mn2+-iron) Transporter (Nramp) Family	Nramp
9CJW_76	Methylomirabilota	2.A.55	The Metal Ion (Mn2+-iron) Transporter (Nramp) Family	Nramp
9CJW_79	Gemmatimonadota	2.A.55	The Metal Ion (Mn2+-iron) Transporter (Nramp) Family	Nramp
9CJW_8	Acidobacteriota	2.A.55	The Metal Ion (Mn2+-iron) Transporter (Nramp) Family	Nramp
9CJW_8	Acidobacteriota	2.A.55	The Metal Ion (Mn2+-iron) Transporter (Nramp) Family	Nramp
9CJW_90	Proteobacteria	2.A.55	The Metal Ion (Mn2+-iron) Transporter (Nramp) Family	Nramp
9CJW_94	Proteobacteria	2.A.55	The Metal Ion (Mn2+-iron) Transporter (Nramp) Family	Nramp
9CJW_9	KSB1	2.A.55	The Metal Ion (Mn2+-iron) Transporter (Nramp) Family	Nramp
9DJH_16	Methylomirabilota	2.A.55	The Metal Ion (Mn2+-iron) Transporter (Nramp) Family	Nramp
9DJH_18	Acidobacteriota	2.A.55	The Metal Ion (Mn2+-iron) Transporter (Nramp) Family	Nramp
9DJH_21	Gemmatimonadota	2.A.55	The Metal Ion (Mn2+-iron) Transporter (Nramp) Family	Nramp
ROV5_18	Gemmatimonadota	2.A.55	The Metal Ion (Mn2+-iron) Transporter (Nramp) Family	Nramp
ROV5_29	Acidobacteriota	2.A.55	The Metal Ion (Mn2+-iron) Transporter (Nramp) Family	Nramp
ROV5_32	Gemmatimonadota	2.A.55	The Metal Ion (Mn2+-iron) Transporter (Nramp) Family	Nramp
ROV5_47	Gemmatimonadota	2.A.55	The Metal Ion (Mn2+-iron) Transporter (Nramp) Family	Nramp
ROV5_4	Methylomirabilota	2.A.55	The Metal Ion (Mn2+-iron) Transporter (Nramp) Family	Nramp
ROV5_52	Acidobacteriota	2.A.55	The Metal Ion (Mn2+-iron) Transporter (Nramp) Family	Nramp
ROV5_53	Acidobacteriota	2.A.55	The Metal Ion (Mn2+-iron) Transporter (Nramp) Family	Nramp
ROV5_54	Proteobacteria	2.A.55	The Metal Ion (Mn2+-iron) Transporter (Nramp) Family	Nramp
ROV5_57	Methylomirabilota	2.A.55	The Metal Ion (Mn2+-iron) Transporter (Nramp) Family	Nramp
ROV5_6	Desulfobacterota_B	2.A.55	The Metal Ion (Mn2+-iron) Transporter (Nramp) Family	Nramp
ROV5_84	Planctomycetota	2.A.55	The Metal Ion (Mn2+-iron) Transporter (Nramp) Family	Nramp
ROV5_87	Desulfobacterota_B	2.A.55	The Metal Ion (Mn2+-iron) Transporter (Nramp) Family	Nramp
ROV5_99	Bacteroidota	2.A.55	The Metal Ion (Mn2+-iron) Transporter (Nramp) Family	Nramp
9CJW_24	Nitrospinota	2.A.108	The Iron/Lead Transporter (ILT) Family	ILT
9CJW_26	Desulfobacterota_D	2.A.108	The Iron/Lead Transporter (ILT) Family	ILT
9CJW_35	Chloroflexota	2.A.108	The Iron/Lead Transporter (ILT) Family	ILT
9CJW_45	Thermoproteota	2.A.108	The Iron/Lead Transporter (ILT) Family	ILT
9CJW_49	Hydrogenedentota	2.A.108	The Iron/Lead Transporter (ILT) Family	ILT
9CJW_4	Nitrospirota	2.A.108	The Iron/Lead Transporter (ILT) Family	ILT
9CJW_58	Gemmatimonadota	2.A.108	The Iron/Lead Transporter (ILT) Family	ILT
9CJW_5	Proteobacteria	2.A.108	The Iron/Lead Transporter (ILT) Family	ILT
9CJW_60	Chloroflexota	2.A.108	The Iron/Lead Transporter (ILT) Family	ILT
9CJW_65	Acidobacteriota	2.A.108	The Iron/Lead Transporter (ILT) Family	ILT
9CJW_66	Gemmatimonadota	2.A.108	The Iron/Lead Transporter (ILT) Family	ILT
9CJW_68	Actinobacteriota	2.A.108	The Iron/Lead Transporter (ILT) Family	ILT
9CJW_68	Actinobacteriota	2.A.108	The Iron/Lead Transporter (ILT) Family	ILT
9CJW_6	Proteobacteria	2.A.108	The Iron/Lead Transporter (ILT) Family	ILT
9CJW_6	Proteobacteria	2.A.108	The Iron/Lead Transporter (ILT) Family	ILT
9CJW_73	Methylomirabilota	2.A.108	The Iron/Lead Transporter (ILT) Family	ILT
9CJW_76	Methylomirabilota	2.A.108	The Iron/Lead Transporter (ILT) Family	ILT
9CJW_79	Gemmatimonadota	2.A.108	The Iron/Lead Transporter (ILT) Family	ILT
9CJW_83	Desulfobacterota_B	2.A.108	The Iron/Lead Transporter (ILT) Family	ILT
9CJW_88	Chloroflexota	2.A.108	The Iron/Lead Transporter (ILT) Family	ILT
9CJW_92	Nitrospinota	2.A.108	The Iron/Lead Transporter (ILT) Family	ILT
9DJH_21	Gemmatimonadota	2.A.108	The Iron/Lead Transporter (ILT) Family	ILT
ROV5_108	Actinobacteriota	2.A.108	The Iron/Lead Transporter (ILT) Family	ILT
ROV5_13	Desulfobacterota_D	2.A.108	The Iron/Lead Transporter (ILT) Family	ILT
ROV5_18	Gemmatimonadota	2.A.108	The Iron/Lead Transporter (ILT) Family	ILT
ROV5_25	Desulfobacterota_D	2.A.108	The Iron/Lead Transporter (ILT) Family	ILT
ROV5_29	Acidobacteriota	2.A.108	The Iron/Lead Transporter (ILT) Family	ILT
ROV5_32	Gemmatimonadota	2.A.108	The Iron/Lead Transporter (ILT) Family	ILT
ROV5_32	Gemmatimonadota	2.A.108	The Iron/Lead Transporter (ILT) Family	ILT
ROV5_53	Acidobacteriota	2.A.108	The Iron/Lead Transporter (ILT) Family	ILT
ROV5_56	Desulfobacterota_D	2.A.108	The Iron/Lead Transporter (ILT) Family	ILT
ROV5_63	Nitrospinota	2.A.108	The Iron/Lead Transporter (ILT) Family	ILT
ROV5_87	Desulfobacterota_B	2.A.108	The Iron/Lead Transporter (ILT) Family	ILT
9CJW_11	Proteobacteria	9.B.105	The Lead Resistance Fusion Protein (PbrBC) Family	PbrBC
9CJW_12	Proteobacteria	9.B.105	The Lead Resistance Fusion Protein (PbrBC) Family	PbrBC
9CJW_13	Acidobacteriota	9.B.105	The Lead Resistance Fusion Protein (PbrBC) Family	PbrBC
9CJW_17	Chloroflexota	9.B.105	The Lead Resistance Fusion Protein (PbrBC) Family	PbrBC
9CJW_23	Acidobacteriota	9.B.105	The Lead Resistance Fusion Protein (PbrBC) Family	PbrBC
9CJW_24	Nitrospinota	9.B.105	The Lead Resistance Fusion Protein (PbrBC) Family	PbrBC
9CJW_30	Gemmatimonadota	9.B.105	The Lead Resistance Fusion Protein (PbrBC) Family	PbrBC
9CJW_33	KSB1	9.B.105	The Lead Resistance Fusion Protein (PbrBC) Family	PbrBC
9CJW_33	KSB1	9.B.105	The Lead Resistance Fusion Protein (PbrBC) Family	PbrBC
9CJW_35	Chloroflexota	9.B.105	The Lead Resistance Fusion Protein (PbrBC) Family	PbrBC
9CJW_42	Nitrospirota	9.B.105	The Lead Resistance Fusion Protein (PbrBC) Family	PbrBC
9CJW_42	Nitrospirota	9.B.105	The Lead Resistance Fusion Protein (PbrBC) Family	PbrBC
9CJW_44	Acidobacteriota	9.B.105	The Lead Resistance Fusion Protein (PbrBC) Family	PbrBC
9CJW_46	Proteobacteria	9.B.105	The Lead Resistance Fusion Protein (PbrBC) Family	PbrBC
9CJW_47	Proteobacteria	9.B.105	The Lead Resistance Fusion Protein (PbrBC) Family	PbrBC
9CJW_49	Hydrogenedentota	9.B.105	The Lead Resistance Fusion Protein (PbrBC) Family	PbrBC
9CJW_4	Nitrospirota	9.B.105	The Lead Resistance Fusion Protein (PbrBC) Family	PbrBC
9CJW_54	Methylomirabilota	9.B.105	The Lead Resistance Fusion Protein (PbrBC) Family	PbrBC
9CJW_54	Methylomirabilota	9.B.105	The Lead Resistance Fusion Protein (PbrBC) Family	PbrBC
9CJW_55	Unclassified	9.B.105	The Lead Resistance Fusion Protein (PbrBC) Family	PbrBC
9CJW_57	Proteobacteria	9.B.105	The Lead Resistance Fusion Protein (PbrBC) Family	PbrBC
9CJW_57	Proteobacteria	9.B.105	The Lead Resistance Fusion Protein (PbrBC) Family	PbrBC
9CJW_58	Gemmatimonadota	9.B.105	The Lead Resistance Fusion Protein (PbrBC) Family	PbrBC
9CJW_58	Gemmatimonadota	9.B.105	The Lead Resistance Fusion Protein (PbrBC) Family	PbrBC
9CJW_5	Proteobacteria	9.B.105	The Lead Resistance Fusion Protein (PbrBC) Family	PbrBC
9CJW_60	Chloroflexota	9.B.105	The Lead Resistance Fusion Protein (PbrBC) Family	PbrBC
9CJW_63	Myxococcota_A	9.B.105	The Lead Resistance Fusion Protein (PbrBC) Family	PbrBC
9CJW_63	Myxococcota_A	9.B.105	The Lead Resistance Fusion Protein (PbrBC) Family	PbrBC
9CJW_64	Proteobacteria	9.B.105	The Lead Resistance Fusion Protein (PbrBC) Family	PbrBC
9CJW_66	Gemmatimonadota	9.B.105	The Lead Resistance Fusion Protein (PbrBC) Family	PbrBC
9CJW_68	Actinobacteriota	9.B.105	The Lead Resistance Fusion Protein (PbrBC) Family	PbrBC
9CJW_68	Actinobacteriota	9.B.105	The Lead Resistance Fusion Protein (PbrBC) Family	PbrBC
9CJW_6	Proteobacteria	9.B.105	The Lead Resistance Fusion Protein (PbrBC) Family	PbrBC
9CJW_70	Proteobacteria	9.B.105	The Lead Resistance Fusion Protein (PbrBC) Family	PbrBC
9CJW_71	Chloroflexota	9.B.105	The Lead Resistance Fusion Protein (PbrBC) Family	PbrBC
9CJW_73	Methylomirabilota	9.B.105	The Lead Resistance Fusion Protein (PbrBC) Family	PbrBC
9CJW_76	Methylomirabilota	9.B.105	The Lead Resistance Fusion Protein (PbrBC) Family	PbrBC
9CJW_76	Methylomirabilota	9.B.105	The Lead Resistance Fusion Protein (PbrBC) Family	PbrBC
9CJW_79	Gemmatimonadota	9.B.105	The Lead Resistance Fusion Protein (PbrBC) Family	PbrBC
9CJW_79	Gemmatimonadota	9.B.105	The Lead Resistance Fusion Protein (PbrBC) Family	PbrBC
9CJW_80	UBA10199	9.B.105	The Lead Resistance Fusion Protein (PbrBC) Family	PbrBC
9CJW_88	Chloroflexota	9.B.105	The Lead Resistance Fusion Protein (PbrBC) Family	PbrBC
9CJW_88	Chloroflexota	9.B.105	The Lead Resistance Fusion Protein (PbrBC) Family	PbrBC
9CJW_8	Acidobacteriota	9.B.105	The Lead Resistance Fusion Protein (PbrBC) Family	PbrBC
9CJW_91	Proteobacteria	9.B.105	The Lead Resistance Fusion Protein (PbrBC) Family	PbrBC
9CJW_94	Proteobacteria	9.B.105	The Lead Resistance Fusion Protein (PbrBC) Family	PbrBC
9CJW_9	KSB1	9.B.105	The Lead Resistance Fusion Protein (PbrBC) Family	PbrBC
9DJH_15	Proteobacteria	9.B.105	The Lead Resistance Fusion Protein (PbrBC) Family	PbrBC
9DJH_16	Methylomirabilota	9.B.105	The Lead Resistance Fusion Protein (PbrBC) Family	PbrBC
9DJH_21	Gemmatimonadota	9.B.105	The Lead Resistance Fusion Protein (PbrBC) Family	PbrBC
9DJH_21	Gemmatimonadota	9.B.105	The Lead Resistance Fusion Protein (PbrBC) Family	PbrBC
9DJH_22	Proteobacteria	9.B.105	The Lead Resistance Fusion Protein (PbrBC) Family	PbrBC
9DJH_24	Proteobacteria	9.B.105	The Lead Resistance Fusion Protein (PbrBC) Family	PbrBC
9DJH_2	Desulfobacterota_B	9.B.105	The Lead Resistance Fusion Protein (PbrBC) Family	PbrBC
ROV5_101	Proteobacteria	9.B.105	The Lead Resistance Fusion Protein (PbrBC) Family	PbrBC
ROV5_108	Actinobacteriota	9.B.105	The Lead Resistance Fusion Protein (PbrBC) Family	PbrBC
ROV5_10	Nitrospirota	9.B.105	The Lead Resistance Fusion Protein (PbrBC) Family	PbrBC
ROV5_12	Proteobacteria	9.B.105	The Lead Resistance Fusion Protein (PbrBC) Family	PbrBC
ROV5_13	Desulfobacterota_D	9.B.105	The Lead Resistance Fusion Protein (PbrBC) Family	PbrBC
ROV5_14	Proteobacteria	9.B.105	The Lead Resistance Fusion Protein (PbrBC) Family	PbrBC
ROV5_15	Nitrospirota	9.B.105	The Lead Resistance Fusion Protein (PbrBC) Family	PbrBC
ROV5_16	Nitrospirota	9.B.105	The Lead Resistance Fusion Protein (PbrBC) Family	PbrBC
ROV5_18	Gemmatimonadota	9.B.105	The Lead Resistance Fusion Protein (PbrBC) Family	PbrBC
ROV5_18	Gemmatimonadota	9.B.105	The Lead Resistance Fusion Protein (PbrBC) Family	PbrBC
ROV5_1	Gemmatimonadota	9.B.105	The Lead Resistance Fusion Protein (PbrBC) Family	PbrBC
ROV5_20	Proteobacteria	9.B.105	The Lead Resistance Fusion Protein (PbrBC) Family	PbrBC
ROV5_24	Proteobacteria	9.B.105	The Lead Resistance Fusion Protein (PbrBC) Family	PbrBC
ROV5_25	Desulfobacterota_D	9.B.105	The Lead Resistance Fusion Protein (PbrBC) Family	PbrBC
ROV5_27	Proteobacteria	9.B.105	The Lead Resistance Fusion Protein (PbrBC) Family	PbrBC
ROV5_28	Proteobacteria	9.B.105	The Lead Resistance Fusion Protein (PbrBC) Family	PbrBC
ROV5_29	Acidobacteriota	9.B.105	The Lead Resistance Fusion Protein (PbrBC) Family	PbrBC
ROV5_30	Proteobacteria	9.B.105	The Lead Resistance Fusion Protein (PbrBC) Family	PbrBC
ROV5_32	Gemmatimonadota	9.B.105	The Lead Resistance Fusion Protein (PbrBC) Family	PbrBC
ROV5_32	Gemmatimonadota	9.B.105	The Lead Resistance Fusion Protein (PbrBC) Family	PbrBC
ROV5_33	Proteobacteria	9.B.105	The Lead Resistance Fusion Protein (PbrBC) Family	PbrBC
ROV5_34	Proteobacteria	9.B.105	The Lead Resistance Fusion Protein (PbrBC) Family	PbrBC
ROV5_35	Nitrospirota	9.B.105	The Lead Resistance Fusion Protein (PbrBC) Family	PbrBC
ROV5_3	Proteobacteria	9.B.105	The Lead Resistance Fusion Protein (PbrBC) Family	PbrBC
ROV5_40	Proteobacteria	9.B.105	The Lead Resistance Fusion Protein (PbrBC) Family	PbrBC
ROV5_45	Proteobacteria	9.B.105	The Lead Resistance Fusion Protein (PbrBC) Family	PbrBC
ROV5_45	Proteobacteria	9.B.105	The Lead Resistance Fusion Protein (PbrBC) Family	PbrBC
ROV5_47	Gemmatimonadota	9.B.105	The Lead Resistance Fusion Protein (PbrBC) Family	PbrBC
ROV5_48	Bacteroidota	9.B.105	The Lead Resistance Fusion Protein (PbrBC) Family	PbrBC
ROV5_4	Methylomirabilota	9.B.105	The Lead Resistance Fusion Protein (PbrBC) Family	PbrBC
ROV5_50	Proteobacteria	9.B.105	The Lead Resistance Fusion Protein (PbrBC) Family	PbrBC
ROV5_52	Acidobacteriota	9.B.105	The Lead Resistance Fusion Protein (PbrBC) Family	PbrBC
ROV5_53	Acidobacteriota	9.B.105	The Lead Resistance Fusion Protein (PbrBC) Family	PbrBC
ROV5_57	Methylomirabilota	9.B.105	The Lead Resistance Fusion Protein (PbrBC) Family	PbrBC
ROV5_58	Proteobacteria	9.B.105	The Lead Resistance Fusion Protein (PbrBC) Family	PbrBC
ROV5_59	Proteobacteria	9.B.105	The Lead Resistance Fusion Protein (PbrBC) Family	PbrBC
ROV5_62	Chloroflexota	9.B.105	The Lead Resistance Fusion Protein (PbrBC) Family	PbrBC
ROV5_65	Proteobacteria	9.B.105	The Lead Resistance Fusion Protein (PbrBC) Family	PbrBC
ROV5_66	Proteobacteria	9.B.105	The Lead Resistance Fusion Protein (PbrBC) Family	PbrBC
ROV5_71	Nitrospirota	9.B.105	The Lead Resistance Fusion Protein (PbrBC) Family	PbrBC
ROV5_72	Proteobacteria	9.B.105	The Lead Resistance Fusion Protein (PbrBC) Family	PbrBC
ROV5_72	Proteobacteria	9.B.105	The Lead Resistance Fusion Protein (PbrBC) Family	PbrBC
ROV5_72	Proteobacteria	9.B.105	The Lead Resistance Fusion Protein (PbrBC) Family	PbrBC
ROV5_76	Proteobacteria	9.B.105	The Lead Resistance Fusion Protein (PbrBC) Family	PbrBC
ROV5_77	Proteobacteria	9.B.105	The Lead Resistance Fusion Protein (PbrBC) Family	PbrBC
ROV5_79	Chloroflexota	9.B.105	The Lead Resistance Fusion Protein (PbrBC) Family	PbrBC
ROV5_79	Chloroflexota	9.B.105	The Lead Resistance Fusion Protein (PbrBC) Family	PbrBC
ROV5_79	Chloroflexota	9.B.105	The Lead Resistance Fusion Protein (PbrBC) Family	PbrBC
ROV5_82	Bacteroidota	9.B.105	The Lead Resistance Fusion Protein (PbrBC) Family	PbrBC
ROV5_85	KSB1	9.B.105	The Lead Resistance Fusion Protein (PbrBC) Family	PbrBC
ROV5_85	KSB1	9.B.105	The Lead Resistance Fusion Protein (PbrBC) Family	PbrBC
ROV5_87	Desulfobacterota_B	9.B.105	The Lead Resistance Fusion Protein (PbrBC) Family	PbrBC
ROV5_94	Proteobacteria	9.B.105	The Lead Resistance Fusion Protein (PbrBC) Family	PbrBC
ROV5_9	Proteobacteria	9.B.105	The Lead Resistance Fusion Protein (PbrBC) Family	PbrBC
9CJW_20	Thermoproteota	2.A.5	The Zinc (Zn2+)-Iron (Fe2+) Permease (ZIP) Family	ZIP
9CJW_2	Proteobacteria	2.A.5	The Zinc (Zn2+)-Iron (Fe2+) Permease (ZIP) Family	ZIP
9CJW_46	Proteobacteria	2.A.5	The Zinc (Zn2+)-Iron (Fe2+) Permease (ZIP) Family	ZIP
9CJW_54	Methylomirabilota	2.A.5	The Zinc (Zn2+)-Iron (Fe2+) Permease (ZIP) Family	ZIP
9CJW_57	Proteobacteria	2.A.5	The Zinc (Zn2+)-Iron (Fe2+) Permease (ZIP) Family	ZIP
9CJW_58	Gemmatimonadota	2.A.5	The Zinc (Zn2+)-Iron (Fe2+) Permease (ZIP) Family	ZIP
9CJW_67	Acidobacteriota	2.A.5	The Zinc (Zn2+)-Iron (Fe2+) Permease (ZIP) Family	ZIP
9CJW_67	Acidobacteriota	2.A.5	The Zinc (Zn2+)-Iron (Fe2+) Permease (ZIP) Family	ZIP
9CJW_67	Acidobacteriota	2.A.5	The Zinc (Zn2+)-Iron (Fe2+) Permease (ZIP) Family	ZIP
9CJW_71	Chloroflexota	2.A.5	The Zinc (Zn2+)-Iron (Fe2+) Permease (ZIP) Family	ZIP
9CJW_71	Chloroflexota	2.A.5	The Zinc (Zn2+)-Iron (Fe2+) Permease (ZIP) Family	ZIP
9CJW_86	Nitrospirota	2.A.5	The Zinc (Zn2+)-Iron (Fe2+) Permease (ZIP) Family	ZIP
9CJW_86	Nitrospirota	2.A.5	The Zinc (Zn2+)-Iron (Fe2+) Permease (ZIP) Family	ZIP
9CJW_8	Acidobacteriota	2.A.5	The Zinc (Zn2+)-Iron (Fe2+) Permease (ZIP) Family	ZIP
9DJH_18	Acidobacteriota	2.A.5	The Zinc (Zn2+)-Iron (Fe2+) Permease (ZIP) Family	ZIP
9DJH_18	Acidobacteriota	2.A.5	The Zinc (Zn2+)-Iron (Fe2+) Permease (ZIP) Family	ZIP
ROV5_10	Nitrospirota	2.A.5	The Zinc (Zn2+)-Iron (Fe2+) Permease (ZIP) Family	ZIP
ROV5_13	Desulfobacterota_D	2.A.5	The Zinc (Zn2+)-Iron (Fe2+) Permease (ZIP) Family	ZIP
ROV5_17	Tectomicrobia	2.A.5	The Zinc (Zn2+)-Iron (Fe2+) Permease (ZIP) Family	ZIP
ROV5_18	Gemmatimonadota	2.A.5	The Zinc (Zn2+)-Iron (Fe2+) Permease (ZIP) Family	ZIP
ROV5_25	Desulfobacterota_D	2.A.5	The Zinc (Zn2+)-Iron (Fe2+) Permease (ZIP) Family	ZIP
ROV5_34	Proteobacteria	2.A.5	The Zinc (Zn2+)-Iron (Fe2+) Permease (ZIP) Family	ZIP
ROV5_44	Thermoproteota	2.A.5	The Zinc (Zn2+)-Iron (Fe2+) Permease (ZIP) Family	ZIP
ROV5_47	Gemmatimonadota	2.A.5	The Zinc (Zn2+)-Iron (Fe2+) Permease (ZIP) Family	ZIP
ROV5_53	Acidobacteriota	2.A.5	The Zinc (Zn2+)-Iron (Fe2+) Permease (ZIP) Family	ZIP
ROV5_56	Desulfobacterota_D	2.A.5	The Zinc (Zn2+)-Iron (Fe2+) Permease (ZIP) Family	ZIP
ROV5_59	Proteobacteria	2.A.5	The Zinc (Zn2+)-Iron (Fe2+) Permease (ZIP) Family	ZIP
ROV5_64	Proteobacteria	2.A.5	The Zinc (Zn2+)-Iron (Fe2+) Permease (ZIP) Family	ZIP
ROV5_67	Desulfobacterota_D	2.A.5	The Zinc (Zn2+)-Iron (Fe2+) Permease (ZIP) Family	ZIP
ROV5_86	KSB1	2.A.5	The Zinc (Zn2+)-Iron (Fe2+) Permease (ZIP) Family	ZIP

## Sheet: S7
Table S7. Information on metal redox annotations of MAGs from deep-sea nodule-area nodule samples.
MAGs ID	MAG's classification at the phylum level	Family	Function annotation
9CJW_11	Proteobacteria	API83142.1	AioA
9CJW_11	Proteobacteria	AVY91882.1	AioA
9CJW_11	Proteobacteria	AVY91883.1	AioA
9CJW_11	Proteobacteria	AVY91881.1	AioA
9CJW_11	Proteobacteria	API83142.1	AioA
9CJW_11	Proteobacteria	AVY91882.1	AioA
9CJW_11	Proteobacteria	AVY91881.1	AioA
9CJW_11	Proteobacteria	API83142.1	AioA
9CJW_11	Proteobacteria	AJF80180.1	ArsC
9CJW_11	Proteobacteria	ABO28453.1	ArsC
9CJW_11	Proteobacteria	ABO28455.1	ArsC
9CJW_11	Proteobacteria	ABO28454.1	ArsC
9CJW_11	Proteobacteria	ABO28456.1	ArsC
9CJW_11	Proteobacteria	AVY91883.1	AioA
9CJW_11	Proteobacteria	AVY91881.1	AioA
9CJW_11	Proteobacteria	API83142.1	AioA
9CJW_11	Proteobacteria	AVY91882.1	AioA
9CJW_12	Proteobacteria	API83142.1	AioA
9CJW_12	Proteobacteria	AVY91883.1	AioA
9CJW_12	Proteobacteria	AVY91882.1	AioA
9CJW_12	Proteobacteria	AVY91883.1	AioA
9CJW_12	Proteobacteria	AVY91881.1	AioA
9CJW_12	Proteobacteria	AVY91882.1	AioA
9CJW_13	Acidobacteriota	API83142.1	AioA
9CJW_13	Acidobacteriota	AVY91882.1	AioA
9CJW_13	Acidobacteriota	AVY91881.1	AioA
9CJW_13	Acidobacteriota	API83142.1	AioA
9CJW_13	Acidobacteriota	AVY91883.1	AioA
9CJW_14	Proteobacteria	AJF80180.1	ArsC
9CJW_14	Proteobacteria	ABO28453.1	ArsC
9CJW_14	Proteobacteria	ABO28455.1	ArsC
9CJW_14	Proteobacteria	ABO28454.1	ArsC
9CJW_14	Proteobacteria	ABO28456.1	ArsC
9CJW_17	Chloroflexota	AVY91883.1	AioA
9CJW_17	Chloroflexota	AVY91882.1	AioA
9CJW_17	Chloroflexota	AVY91881.1	AioA
9CJW_17	Chloroflexota	API83142.1	AioA
9CJW_17	Chloroflexota	AUN86606.1	AioA
9CJW_17	Chloroflexota	AVY91883.1	AioA
9CJW_17	Chloroflexota	AVY91882.1	AioA
9CJW_17	Chloroflexota	AVY91881.1	AioA
9CJW_17	Chloroflexota	API83142.1	AioA
9CJW_19	Myxococcota	AJF80180.1	ArsC
9CJW_19	Myxococcota	API83142.1	AioA
9CJW_21	Planctomycetota	API83142.1	AioA
9CJW_21	Planctomycetota	AVY91883.1	AioA
9CJW_21	Planctomycetota	AVY91882.1	AioA
9CJW_21	Planctomycetota	AVY91881.1	AioA
9CJW_21	Planctomycetota	API83142.1	AioA
9CJW_21	Planctomycetota	AUN86606.1	AioA
9CJW_22	Proteobacteria	AVY91883.1	AioA
9CJW_22	Proteobacteria	API83142.1	AioA
9CJW_22	Proteobacteria	AVY91882.1	AioA
9CJW_22	Proteobacteria	AVY91881.1	AioA
9CJW_22	Proteobacteria	AVY91883.1	AioA
9CJW_22	Proteobacteria	AVY91881.1	AioA
9CJW_22	Proteobacteria	AVY91882.1	AioA
9CJW_22	Proteobacteria	AVY91883.1	AioA
9CJW_22	Proteobacteria	API83142.1	AioA
9CJW_22	Proteobacteria	AVY91882.1	AioA
9CJW_22	Proteobacteria	AVY91883.1	AioA
9CJW_22	Proteobacteria	AUN86606.1	AioA
9CJW_24	Nitrospinota	AVY91882.1	AioA
9CJW_24	Nitrospinota	AVY91883.1	AioA
9CJW_24	Nitrospinota	API83142.1	AioA
9CJW_26	Desulfobacterota_D	AJF80180.1	ArsC
9CJW_26	Desulfobacterota_D	ABO28453.1	ArsC
9CJW_26	Desulfobacterota_D	ABO28455.1	ArsC
9CJW_26	Desulfobacterota_D	ABO28454.1	ArsC
9CJW_26	Desulfobacterota_D	ABO28456.1	ArsC
9CJW_29	Proteobacteria	AVY91883.1	AioA
9CJW_29	Proteobacteria	AVY91881.1	AioA
9CJW_29	Proteobacteria	AVY91882.1	AioA
9CJW_2	Proteobacteria	AJF80180.1	ArsC
9CJW_30	Gemmatimonadota	AVY91883.1	AioA
9CJW_30	Gemmatimonadota	AVY91882.1	AioA
9CJW_30	Gemmatimonadota	AVY91881.1	AioA
9CJW_30	Gemmatimonadota	API83142.1	AioA
9CJW_33	KSB1	AVY91882.1	AioA
9CJW_33	KSB1	API83142.1	AioA
9CJW_33	KSB1	API83142.1	AioA
9CJW_33	KSB1	AVY91883.1	AioA
9CJW_33	KSB1	AVY91882.1	AioA
9CJW_33	KSB1	AVY91881.1	AioA
9CJW_33	KSB1	AUN86606.1	AioA
9CJW_33	KSB1	AVY91882.1	AioA
9CJW_33	KSB1	AVY91883.1	AioA
9CJW_33	KSB1	API83142.1	AioA
9CJW_33	KSB1	AVY91881.1	AioA
9CJW_33	KSB1	AVY91883.1	AioA
9CJW_34	Proteobacteria	AVY91882.1	AioA
9CJW_34	Proteobacteria	AVY91881.1	AioA
9CJW_34	Proteobacteria	AJF80180.1	ArsC
9CJW_34	Proteobacteria	ABO28453.1	ArsC
9CJW_34	Proteobacteria	ABO28455.1	ArsC
9CJW_34	Proteobacteria	ABO28454.1	ArsC
9CJW_34	Proteobacteria	ABO28456.1	ArsC
9CJW_34	Proteobacteria	AVY91882.1	AioA
9CJW_34	Proteobacteria	API83142.1	AioA
9CJW_34	Proteobacteria	AVY91881.1	AioA
9CJW_34	Proteobacteria	AVY91881.1	AioA
9CJW_34	Proteobacteria	AVY91882.1	AioA
9CJW_34	Proteobacteria	AVY91882.1	AioA
9CJW_34	Proteobacteria	AVY91881.1	AioA
9CJW_35	Chloroflexota	AUN86606.1	AioA
9CJW_42	Nitrospirota	AVY91883.1	AioA
9CJW_43	Bacteroidota	AJF80180.1	ArsC
9CJW_43	Bacteroidota	ABO28453.1	ArsC
9CJW_43	Bacteroidota	ABO28455.1	ArsC
9CJW_43	Bacteroidota	ABO28454.1	ArsC
9CJW_43	Bacteroidota	ABO28456.1	ArsC
9CJW_43	Bacteroidota	API83142.1	AioA
9CJW_44	Acidobacteriota	AVY91883.1	AioA
9CJW_44	Acidobacteriota	AVY91882.1	AioA
9CJW_44	Acidobacteriota	AVY91881.1	AioA
9CJW_44	Acidobacteriota	AVY91883.1	AioA
9CJW_44	Acidobacteriota	API83142.1	AioA
9CJW_44	Acidobacteriota	AVY91882.1	AioA
9CJW_44	Acidobacteriota	API83142.1	AioA
9CJW_44	Acidobacteriota	AVY91882.1	AioA
9CJW_44	Acidobacteriota	AVY91881.1	AioA
9CJW_44	Acidobacteriota	API83142.1	AioA
9CJW_44	Acidobacteriota	AVY91883.1	AioA
9CJW_44	Acidobacteriota	AVY91882.1	AioA
9CJW_44	Acidobacteriota	AVY91883.1	AioA
9CJW_44	Acidobacteriota	AVY91882.1	AioA
9CJW_44	Acidobacteriota	AVY91881.1	AioA
9CJW_44	Acidobacteriota	AVY91882.1	AioA
9CJW_44	Acidobacteriota	AVY91883.1	AioA
9CJW_44	Acidobacteriota	AVY91881.1	AioA
9CJW_44	Acidobacteriota	API83142.1	AioA
9CJW_44	Acidobacteriota	AVY91882.1	AioA
9CJW_44	Acidobacteriota	AVY91881.1	AioA
9CJW_44	Acidobacteriota	AVY91883.1	AioA
9CJW_44	Acidobacteriota	AVY91881.1	AioA
9CJW_44	Acidobacteriota	AVY91882.1	AioA
9CJW_44	Acidobacteriota	API83142.1	AioA
9CJW_45	Thermoproteota	AJF80180.1	ArsC
9CJW_45	Thermoproteota	ABO28453.1	ArsC
9CJW_45	Thermoproteota	ABO28455.1	ArsC
9CJW_45	Thermoproteota	ABO28454.1	ArsC
9CJW_45	Thermoproteota	ABO28456.1	ArsC
9CJW_46	Proteobacteria	AJF80180.1	ArsC
9CJW_46	Proteobacteria	ABO28453.1	ArsC
9CJW_46	Proteobacteria	ABO28455.1	ArsC
9CJW_46	Proteobacteria	ABO28454.1	ArsC
9CJW_46	Proteobacteria	ABO28456.1	ArsC
9CJW_47	Proteobacteria	AJF80180.1	ArsC
9CJW_47	Proteobacteria	ABO28453.1	ArsC
9CJW_47	Proteobacteria	ABO28455.1	ArsC
9CJW_47	Proteobacteria	ABO28454.1	ArsC
9CJW_47	Proteobacteria	ABO28456.1	ArsC
9CJW_47	Proteobacteria	AVY91883.1	AioA
9CJW_47	Proteobacteria	AVY91882.1	AioA
9CJW_47	Proteobacteria	API83142.1	AioA
9CJW_47	Proteobacteria	AVY91881.1	AioA
9CJW_47	Proteobacteria	API83142.1	AioA
9CJW_47	Proteobacteria	AVY91882.1	AioA
9CJW_47	Proteobacteria	AVY91881.1	AioA
9CJW_48	Proteobacteria	AVY91883.1	AioA
9CJW_48	Proteobacteria	AVY91881.1	AioA
9CJW_48	Proteobacteria	AVY91882.1	AioA
9CJW_48	Proteobacteria	API83142.1	AioA
9CJW_48	Proteobacteria	AVY91883.1	AioA
9CJW_48	Proteobacteria	API83142.1	AioA
9CJW_48	Proteobacteria	AVY91881.1	AioA
9CJW_48	Proteobacteria	AVY91882.1	AioA
9CJW_49	Hydrogenedentota	AVY91882.1	AioA
9CJW_49	Hydrogenedentota	API83142.1	AioA
9CJW_49	Hydrogenedentota	AVY91883.1	AioA
9CJW_49	Hydrogenedentota	AJF80180.1	ArsC
9CJW_49	Hydrogenedentota	ABO28453.1	ArsC
9CJW_49	Hydrogenedentota	ABO28455.1	ArsC
9CJW_49	Hydrogenedentota	ABO28454.1	ArsC
9CJW_49	Hydrogenedentota	ABO28456.1	ArsC
9CJW_4	Nitrospirota	AJF80180.1	ArsC
9CJW_4	Nitrospirota	ABO28453.1	ArsC
9CJW_4	Nitrospirota	ABO28455.1	ArsC
9CJW_4	Nitrospirota	ABO28454.1	ArsC
9CJW_4	Nitrospirota	ABO28456.1	ArsC
9CJW_4	Nitrospirota	API83142.1	AioA
9CJW_4	Nitrospirota	AVY91883.1	AioA
9CJW_4	Nitrospirota	AVY91882.1	AioA
9CJW_4	Nitrospirota	AVY91881.1	AioA
9CJW_51	Thermoproteota	AVY91883.1	AioA
9CJW_51	Thermoproteota	API83142.1	AioA
9CJW_51	Thermoproteota	AVY91882.1	AioA
9CJW_51	Thermoproteota	AVY91881.1	AioA
9CJW_54	Methylomirabilota	AVY91882.1	AioA
9CJW_54	Methylomirabilota	AVY91881.1	AioA
9CJW_54	Methylomirabilota	AVY91882.1	AioA
9CJW_54	Methylomirabilota	API83142.1	AioA
9CJW_57	Proteobacteria	API83142.1	AioA
9CJW_57	Proteobacteria	AJF80180.1	ArsC
9CJW_57	Proteobacteria	ABO28453.1	ArsC
9CJW_57	Proteobacteria	ABO28455.1	ArsC
9CJW_57	Proteobacteria	ABO28454.1	ArsC
9CJW_57	Proteobacteria	ABO28456.1	ArsC
9CJW_58	Gemmatimonadota	API83142.1	AioA
9CJW_58	Gemmatimonadota	AVY91881.1	AioA
9CJW_58	Gemmatimonadota	AVY91882.1	AioA
9CJW_58	Gemmatimonadota	AVY91883.1	AioA
9CJW_58	Gemmatimonadota	API83142.1	AioA
9CJW_5	Proteobacteria	AJF80180.1	ArsC
9CJW_60	Chloroflexota	AUN86606.1	AioA
9CJW_61	Myxococcota_A	API83142.1	AioA
9CJW_61	Myxococcota_A	AVY91881.1	AioA
9CJW_61	Myxococcota_A	AVY91882.1	AioA
9CJW_61	Myxococcota_A	API83142.1	AioA
9CJW_63	Myxococcota_A	API83142.1	AioA
9CJW_63	Myxococcota_A	API83142.1	AioA
9CJW_63	Myxococcota_A	AJF80180.1	ArsC
9CJW_63	Myxococcota_A	ABO28453.1	ArsC
9CJW_63	Myxococcota_A	ABO28455.1	ArsC
9CJW_63	Myxococcota_A	ABO28454.1	ArsC
9CJW_63	Myxococcota_A	ABO28456.1	ArsC
9CJW_63	Myxococcota_A	API83142.1	AioA
9CJW_63	Myxococcota_A	AVY91881.1	AioA
9CJW_63	Myxococcota_A	AVY91883.1	AioA
9CJW_63	Myxococcota_A	AVY91882.1	AioA
9CJW_63	Myxococcota_A	AVY91883.1	AioA
9CJW_63	Myxococcota_A	AVY91882.1	AioA
9CJW_63	Myxococcota_A	API83142.1	AioA
9CJW_65	Acidobacteriota	API83142.1	AioA
9CJW_65	Acidobacteriota	AVY91881.1	AioA
9CJW_65	Acidobacteriota	AVY91882.1	AioA
9CJW_65	Acidobacteriota	AVY91883.1	AioA
9CJW_65	Acidobacteriota	API83142.1	AioA
9CJW_66	Gemmatimonadota	API83142.1	AioA
9CJW_66	Gemmatimonadota	AVY91881.1	AioA
9CJW_66	Gemmatimonadota	AVY91882.1	AioA
9CJW_66	Gemmatimonadota	AVY91883.1	AioA
9CJW_66	Gemmatimonadota	API83142.1	AioA
9CJW_66	Gemmatimonadota	API83142.1	AioA
9CJW_67	Acidobacteriota	AVY91882.1	AioA
9CJW_67	Acidobacteriota	API83142.1	AioA
9CJW_67	Acidobacteriota	AVY91883.1	AioA
9CJW_67	Acidobacteriota	AVY91881.1	AioA
9CJW_68	Actinobacteriota	AVY91882.1	AioA
9CJW_68	Actinobacteriota	AVY91883.1	AioA
9CJW_68	Actinobacteriota	AVY91881.1	AioA
9CJW_68	Actinobacteriota	API83142.1	AioA
9CJW_68	Actinobacteriota	AUN86606.1	AioA
9CJW_6	Proteobacteria	AVY91882.1	AioA
9CJW_6	Proteobacteria	AVY91881.1	AioA
9CJW_6	Proteobacteria	AJF80180.1	ArsC
9CJW_6	Proteobacteria	ABO28453.1	ArsC
9CJW_6	Proteobacteria	ABO28455.1	ArsC
9CJW_6	Proteobacteria	ABO28454.1	ArsC
9CJW_6	Proteobacteria	ABO28456.1	ArsC
9CJW_6	Proteobacteria	AVY91883.1	AioA
9CJW_6	Proteobacteria	API83142.1	AioA
9CJW_6	Proteobacteria	AVY91881.1	AioA
9CJW_6	Proteobacteria	AVY91882.1	AioA
9CJW_70	Proteobacteria	AJF80180.1	ArsC
9CJW_70	Proteobacteria	ABO28453.1	ArsC
9CJW_70	Proteobacteria	ABO28455.1	ArsC
9CJW_70	Proteobacteria	ABO28454.1	ArsC
9CJW_70	Proteobacteria	ABO28456.1	ArsC
9CJW_71	Chloroflexota	AUN86606.1	AioA
9CJW_74	Proteobacteria	AVY91883.1	AioA
9CJW_74	Proteobacteria	AVY91882.1	AioA
9CJW_74	Proteobacteria	AVY91881.1	AioA
9CJW_74	Proteobacteria	API83142.1	AioA
9CJW_74	Proteobacteria	AVY91882.1	AioA
9CJW_74	Proteobacteria	AVY91881.1	AioA
9CJW_74	Proteobacteria	AVY91883.1	AioA
9CJW_74	Proteobacteria	API83142.1	AioA
9CJW_76	Methylomirabilota	AVY91881.1	AioA
9CJW_76	Methylomirabilota	AVY91882.1	AioA
9CJW_76	Methylomirabilota	AVY91883.1	AioA
9CJW_76	Methylomirabilota	API83142.1	AioA
9CJW_76	Methylomirabilota	AVY91881.1	AioA
9CJW_76	Methylomirabilota	AVY91882.1	AioA
9CJW_76	Methylomirabilota	API83142.1	AioA
9CJW_76	Methylomirabilota	AVY91883.1	AioA
9CJW_76	Methylomirabilota	AVY91881.1	AioA
9CJW_78	Proteobacteria	AVY91883.1	AioA
9CJW_79	Gemmatimonadota	AVY91883.1	AioA
9CJW_79	Gemmatimonadota	AVY91882.1	AioA
9CJW_79	Gemmatimonadota	AVY91881.1	AioA
9CJW_79	Gemmatimonadota	API83142.1	AioA
9CJW_7	Thermoproteota	AJF80180.1	ArsC
9CJW_7	Thermoproteota	ABO28453.1	ArsC
9CJW_7	Thermoproteota	ABO28455.1	ArsC
9CJW_7	Thermoproteota	ABO28454.1	ArsC
9CJW_7	Thermoproteota	ABO28456.1	ArsC
9CJW_80	UBA10199	AVY91883.1	AioA
9CJW_80	UBA10199	API83142.1	AioA
9CJW_80	UBA10199	AVY91882.1	AioA
9CJW_80	UBA10199	AVY91881.1	AioA
9CJW_80	UBA10199	AJF80180.1	ArsC
9CJW_80	UBA10199	ABO28453.1	ArsC
9CJW_80	UBA10199	ABO28455.1	ArsC
9CJW_80	UBA10199	ABO28454.1	ArsC
9CJW_80	UBA10199	ABO28456.1	ArsC
9CJW_83	Desulfobacterota_B	AVY91883.1	AioA
9CJW_83	Desulfobacterota_B	API83142.1	AioA
9CJW_83	Desulfobacterota_B	AVY91881.1	AioA
9CJW_83	Desulfobacterota_B	AVY91882.1	AioA
9CJW_87	Gemmatimonadota	AVY91883.1	AioA
9CJW_89	Gemmatimonadota	API83142.1	AioA
9CJW_8	Acidobacteriota	AVY91882.1	AioA
9CJW_8	Acidobacteriota	AVY91883.1	AioA
9CJW_8	Acidobacteriota	AVY91881.1	AioA
9CJW_91	Proteobacteria	API83142.1	AioA
9CJW_91	Proteobacteria	AVY91882.1	AioA
9CJW_91	Proteobacteria	AVY91883.1	AioA
9CJW_91	Proteobacteria	AVY91881.1	AioA
9CJW_91	Proteobacteria	AJF80180.1	ArsC
9CJW_91	Proteobacteria	ABO28453.1	ArsC
9CJW_91	Proteobacteria	ABO28455.1	ArsC
9CJW_91	Proteobacteria	ABO28454.1	ArsC
9CJW_91	Proteobacteria	ABO28456.1	ArsC
9CJW_92	Nitrospinota	AJF80180.1	ArsC
9CJW_92	Nitrospinota	ABO28453.1	ArsC
9CJW_92	Nitrospinota	ABO28455.1	ArsC
9CJW_92	Nitrospinota	ABO28454.1	ArsC
9CJW_92	Nitrospinota	ABO28456.1	ArsC
9CJW_94	Proteobacteria	AVY91882.1	AioA
9CJW_94	Proteobacteria	AVY91881.1	AioA
9CJW_94	Proteobacteria	AVY91881.1	AioA
9CJW_94	Proteobacteria	AVY91883.1	AioA
9CJW_94	Proteobacteria	AVY91882.1	AioA
9CJW_94	Proteobacteria	API83142.1	AioA
9CJW_94	Proteobacteria	API83142.1	AioA
9CJW_94	Proteobacteria	AVY91881.1	AioA
9CJW_94	Proteobacteria	AVY91882.1	AioA
9CJW_94	Proteobacteria	AVY91883.1	AioA
9CJW_94	Proteobacteria	API83142.1	AioA
9CJW_94	Proteobacteria	AVY91882.1	AioA
9CJW_94	Proteobacteria	AVY91881.1	AioA
9DJH_13	Thermoproteota	ABO28453.1	ArsC
9DJH_13	Thermoproteota	ABO28455.1	ArsC
9DJH_13	Thermoproteota	ABO28454.1	ArsC
9DJH_13	Thermoproteota	ABO28456.1	ArsC
9DJH_13	Thermoproteota	AJF80180.1	ArsC
9DJH_14	Proteobacteria	API83142.1	AioA
9DJH_14	Proteobacteria	AVY91882.1	AioA
9DJH_14	Proteobacteria	AVY91883.1	AioA
9DJH_14	Proteobacteria	AVY91881.1	AioA
9DJH_14	Proteobacteria	API83142.1	AioA
9DJH_14	Proteobacteria	AVY91883.1	AioA
9DJH_14	Proteobacteria	AUN86606.1	AioA
9DJH_14	Proteobacteria	AVY91883.1	AioA
9DJH_14	Proteobacteria	AVY91881.1	AioA
9DJH_14	Proteobacteria	AVY91882.1	AioA
9DJH_14	Proteobacteria	API83142.1	AioA
9DJH_14	Proteobacteria	AVY91881.1	AioA
9DJH_14	Proteobacteria	AVY91883.1	AioA
9DJH_14	Proteobacteria	AVY91882.1	AioA
9DJH_14	Proteobacteria	AVY91881.1	AioA
9DJH_14	Proteobacteria	API83142.1	AioA
9DJH_15	Proteobacteria	AJF80180.1	ArsC
9DJH_15	Proteobacteria	ABO28453.1	ArsC
9DJH_15	Proteobacteria	ABO28455.1	ArsC
9DJH_15	Proteobacteria	ABO28454.1	ArsC
9DJH_15	Proteobacteria	ABO28456.1	ArsC
9DJH_16	Methylomirabilota	AVY91881.1	AioA
9DJH_18	Acidobacteriota	AVY91883.1	AioA
9DJH_18	Acidobacteriota	AUN86606.1	AioA
9DJH_18	Acidobacteriota	API83142.1	AioA
9DJH_18	Acidobacteriota	AVY91883.1	AioA
9DJH_21	Gemmatimonadota	AVY91883.1	AioA
9DJH_21	Gemmatimonadota	AVY91882.1	AioA
9DJH_21	Gemmatimonadota	AVY91881.1	AioA
9DJH_21	Gemmatimonadota	API83142.1	AioA
9DJH_22	Proteobacteria	AVY91881.1	AioA
9DJH_22	Proteobacteria	API83142.1	AioA
9DJH_22	Proteobacteria	AVY91882.1	AioA
9DJH_22	Proteobacteria	AVY91881.1	AioA
9DJH_22	Proteobacteria	AJF80180.1	ArsC
9DJH_22	Proteobacteria	ABO28453.1	ArsC
9DJH_22	Proteobacteria	ABO28455.1	ArsC
9DJH_22	Proteobacteria	ABO28454.1	ArsC
9DJH_22	Proteobacteria	ABO28456.1	ArsC
9DJH_22	Proteobacteria	AVY91883.1	AioA
9DJH_22	Proteobacteria	AVY91881.1	AioA
9DJH_22	Proteobacteria	AVY91882.1	AioA
9DJH_24	Proteobacteria	AVY91883.1	AioA
9DJH_24	Proteobacteria	API83142.1	AioA
9DJH_24	Proteobacteria	AVY91882.1	AioA
9DJH_24	Proteobacteria	AVY91881.1	AioA
9DJH_24	Proteobacteria	AVY91883.1	AioA
9DJH_24	Proteobacteria	AVY91881.1	AioA
9DJH_24	Proteobacteria	AVY91882.1	AioA
9DJH_24	Proteobacteria	API83142.1	AioA
9DJH_24	Proteobacteria	AVY91883.1	AioA
9DJH_24	Proteobacteria	AVY91882.1	AioA
9DJH_24	Proteobacteria	AVY91881.1	AioA
9DJH_24	Proteobacteria	API83142.1	AioA
9DJH_24	Proteobacteria	AUN86606.1	AioA
9DJH_24	Proteobacteria	AVY91882.1	AioA
9DJH_24	Proteobacteria	AVY91883.1	AioA
9DJH_24	Proteobacteria	AVY91881.1	AioA
9DJH_24	Proteobacteria	API83142.1	AioA
9DJH_8	Proteobacteria	AVY91882.1	AioA
9DJH_8	Proteobacteria	API83142.1	AioA
9DJH_8	Proteobacteria	AVY91881.1	AioA
9DJH_8	Proteobacteria	AVY91883.1	AioA
9DJH_8	Proteobacteria	AVY91883.1	AioA
9DJH_8	Proteobacteria	AVY91881.1	AioA
9DJH_8	Proteobacteria	AVY91882.1	AioA
ROV5_101	Proteobacteria	API83142.1	AioA
ROV5_101	Proteobacteria	AVY91881.1	AioA
ROV5_101	Proteobacteria	AVY91883.1	AioA
ROV5_101	Proteobacteria	AVY91882.1	AioA
ROV5_101	Proteobacteria	API83142.1	AioA
ROV5_101	Proteobacteria	AVY91882.1	AioA
ROV5_101	Proteobacteria	AVY91883.1	AioA
ROV5_101	Proteobacteria	AVY91881.1	AioA
ROV5_103	Proteobacteria	API83142.1	AioA
ROV5_103	Proteobacteria	AVY91883.1	AioA
ROV5_105	Proteobacteria	AVY91883.1	AioA
ROV5_105	Proteobacteria	AVY91882.1	AioA
ROV5_105	Proteobacteria	API83142.1	AioA
ROV5_108	Actinobacteriota	AVY91882.1	AioA
ROV5_108	Actinobacteriota	AVY91883.1	AioA
ROV5_108	Actinobacteriota	API83142.1	AioA
ROV5_108	Actinobacteriota	AVY91881.1	AioA
ROV5_108	Actinobacteriota	API83142.1	AioA
ROV5_10	Nitrospirota	AUN86606.1	AioA
ROV5_10	Nitrospirota	API83142.1	AioA
ROV5_10	Nitrospirota	AJF80180.1	ArsC
ROV5_10	Nitrospirota	ABO28453.1	ArsC
ROV5_10	Nitrospirota	ABO28455.1	ArsC
ROV5_10	Nitrospirota	ABO28454.1	ArsC
ROV5_10	Nitrospirota	ABO28456.1	ArsC
ROV5_10	Nitrospirota	AVY91883.1	AioA
ROV5_10	Nitrospirota	AVY91882.1	AioA
ROV5_10	Nitrospirota	AVY91882.1	AioA
ROV5_10	Nitrospirota	AVY91883.1	AioA
ROV5_10	Nitrospirota	API83142.1	AioA
ROV5_10	Nitrospirota	AVY91881.1	AioA
ROV5_12	Proteobacteria	AVY91883.1	AioA
ROV5_12	Proteobacteria	AVY91883.1	AioA
ROV5_12	Proteobacteria	API83142.1	AioA
ROV5_12	Proteobacteria	AVY91882.1	AioA
ROV5_12	Proteobacteria	AVY91883.1	AioA
ROV5_12	Proteobacteria	AUN86606.1	AioA
ROV5_12	Proteobacteria	AVY91883.1	AioA
ROV5_14	Proteobacteria	AVY91883.1	AioA
ROV5_14	Proteobacteria	AVY91882.1	AioA
ROV5_14	Proteobacteria	AVY91881.1	AioA
ROV5_14	Proteobacteria	API83142.1	AioA
ROV5_14	Proteobacteria	AUN86606.1	AioA
ROV5_14	Proteobacteria	AVY91883.1	AioA
ROV5_14	Proteobacteria	AVY91882.1	AioA
ROV5_14	Proteobacteria	AVY91881.1	AioA
ROV5_14	Proteobacteria	API83142.1	AioA
ROV5_14	Proteobacteria	AVY91883.1	AioA
ROV5_14	Proteobacteria	AVY91882.1	AioA
ROV5_14	Proteobacteria	AVY91881.1	AioA
ROV5_15	Nitrospirota	AJF80180.1	ArsC
ROV5_15	Nitrospirota	ABO28453.1	ArsC
ROV5_15	Nitrospirota	ABO28455.1	ArsC
ROV5_15	Nitrospirota	ABO28454.1	ArsC
ROV5_15	Nitrospirota	ABO28456.1	ArsC
ROV5_16	Nitrospirota	API83142.1	AioA
ROV5_16	Nitrospirota	API83142.1	AioA
ROV5_16	Nitrospirota	AVY91881.1	AioA
ROV5_17	Tectomicrobia	AVY91882.1	AioA
ROV5_17	Tectomicrobia	AVY91881.1	AioA
ROV5_17	Tectomicrobia	AVY91883.1	AioA
ROV5_17	Tectomicrobia	API83142.1	AioA
ROV5_17	Tectomicrobia	AVY91883.1	AioA
ROV5_17	Tectomicrobia	AVY91882.1	AioA
ROV5_17	Tectomicrobia	AVY91882.1	AioA
ROV5_17	Tectomicrobia	AVY91883.1	AioA
ROV5_17	Tectomicrobia	AVY91881.1	AioA
ROV5_17	Tectomicrobia	API83142.1	AioA
ROV5_17	Tectomicrobia	AVY91883.1	AioA
ROV5_17	Tectomicrobia	AVY91882.1	AioA
ROV5_17	Tectomicrobia	AVY91881.1	AioA
ROV5_1	Gemmatimonadota	AVY91883.1	AioA
ROV5_1	Gemmatimonadota	AVY91881.1	AioA
ROV5_1	Gemmatimonadota	API83142.1	AioA
ROV5_1	Gemmatimonadota	AVY91882.1	AioA
ROV5_20	Proteobacteria	AVY91881.1	AioA
ROV5_20	Proteobacteria	AVY91882.1	AioA
ROV5_20	Proteobacteria	API83142.1	AioA
ROV5_20	Proteobacteria	AVY91883.1	AioA
ROV5_20	Proteobacteria	AJF80180.1	ArsC
ROV5_20	Proteobacteria	ABO28453.1	ArsC
ROV5_20	Proteobacteria	ABO28455.1	ArsC
ROV5_20	Proteobacteria	ABO28454.1	ArsC
ROV5_20	Proteobacteria	ABO28456.1	ArsC
ROV5_20	Proteobacteria	AVY91883.1	AioA
ROV5_20	Proteobacteria	AVY91882.1	AioA
ROV5_20	Proteobacteria	AVY91881.1	AioA
ROV5_20	Proteobacteria	API83142.1	AioA
ROV5_23	Proteobacteria	AJF80180.1	ArsC
ROV5_23	Proteobacteria	ABO28453.1	ArsC
ROV5_23	Proteobacteria	ABO28455.1	ArsC
ROV5_23	Proteobacteria	ABO28454.1	ArsC
ROV5_23	Proteobacteria	ABO28456.1	ArsC
ROV5_24	Proteobacteria	AJF80180.1	ArsC
ROV5_24	Proteobacteria	ABO28453.1	ArsC
ROV5_24	Proteobacteria	ABO28455.1	ArsC
ROV5_24	Proteobacteria	ABO28454.1	ArsC
ROV5_24	Proteobacteria	ABO28456.1	ArsC
ROV5_24	Proteobacteria	AVY91882.1	AioA
ROV5_24	Proteobacteria	AVY91883.1	AioA
ROV5_24	Proteobacteria	AVY91881.1	AioA
ROV5_24	Proteobacteria	AVY91882.1	AioA
ROV5_24	Proteobacteria	AVY91881.1	AioA
ROV5_24	Proteobacteria	AVY91883.1	AioA
ROV5_24	Proteobacteria	API83142.1	AioA
ROV5_27	Proteobacteria	AJF80180.1	ArsC
ROV5_27	Proteobacteria	ABO28453.1	ArsC
ROV5_27	Proteobacteria	ABO28455.1	ArsC
ROV5_27	Proteobacteria	ABO28454.1	ArsC
ROV5_27	Proteobacteria	ABO28456.1	ArsC
ROV5_30	Proteobacteria	AVY91881.1	AioA
ROV5_30	Proteobacteria	AVY91882.1	AioA
ROV5_30	Proteobacteria	API83142.1	AioA
ROV5_30	Proteobacteria	AVY91883.1	AioA
ROV5_30	Proteobacteria	AVY91882.1	AioA
ROV5_30	Proteobacteria	AVY91881.1	AioA
ROV5_30	Proteobacteria	API83142.1	AioA
ROV5_30	Proteobacteria	AVY91883.1	AioA
ROV5_32	Gemmatimonadota	AVY91883.1	AioA
ROV5_32	Gemmatimonadota	AVY91882.1	AioA
ROV5_32	Gemmatimonadota	AVY91881.1	AioA
ROV5_32	Gemmatimonadota	API83142.1	AioA
ROV5_34	Proteobacteria	AVY91882.1	AioA
ROV5_34	Proteobacteria	AVY91883.1	AioA
ROV5_34	Proteobacteria	API83142.1	AioA
ROV5_34	Proteobacteria	AVY91882.1	AioA
ROV5_34	Proteobacteria	AVY91881.1	AioA
ROV5_34	Proteobacteria	AVY91883.1	AioA
ROV5_34	Proteobacteria	AVY91882.1	AioA
ROV5_34	Proteobacteria	API83142.1	AioA
ROV5_34	Proteobacteria	AJF80180.1	ArsC
ROV5_34	Proteobacteria	ABO28453.1	ArsC
ROV5_34	Proteobacteria	ABO28455.1	ArsC
ROV5_34	Proteobacteria	ABO28454.1	ArsC
ROV5_34	Proteobacteria	ABO28456.1	ArsC
ROV5_35	Nitrospirota	AVY91883.1	AioA
ROV5_35	Nitrospirota	AJF80180.1	ArsC
ROV5_35	Nitrospirota	ABO28453.1	ArsC
ROV5_35	Nitrospirota	ABO28455.1	ArsC
ROV5_35	Nitrospirota	ABO28454.1	ArsC
ROV5_35	Nitrospirota	ABO28456.1	ArsC
ROV5_37	Proteobacteria	AUN86606.1	AioA
ROV5_39	Proteobacteria	AVY91883.1	AioA
ROV5_39	Proteobacteria	AVY91881.1	AioA
ROV5_39	Proteobacteria	AVY91882.1	AioA
ROV5_39	Proteobacteria	AVY91882.1	AioA
ROV5_39	Proteobacteria	AVY91883.1	AioA
ROV5_39	Proteobacteria	AVY91881.1	AioA
ROV5_39	Proteobacteria	API83142.1	AioA
ROV5_3	Proteobacteria	AVY91883.1	AioA
ROV5_3	Proteobacteria	AVY91881.1	AioA
ROV5_3	Proteobacteria	API83142.1	AioA
ROV5_40	Proteobacteria	AVY91882.1	AioA
ROV5_40	Proteobacteria	AVY91883.1	AioA
ROV5_40	Proteobacteria	AVY91881.1	AioA
ROV5_40	Proteobacteria	API83142.1	AioA
ROV5_40	Proteobacteria	AVY91883.1	AioA
ROV5_40	Proteobacteria	AVY91882.1	AioA
ROV5_40	Proteobacteria	AVY91881.1	AioA
ROV5_40	Proteobacteria	API83142.1	AioA
ROV5_43	Nitrospinota	API83142.1	AioA
ROV5_43	Nitrospinota	API83142.1	AioA
ROV5_45	Proteobacteria	AVY91882.1	AioA
ROV5_45	Proteobacteria	AVY91881.1	AioA
ROV5_45	Proteobacteria	AVY91883.1	AioA
ROV5_45	Proteobacteria	API83142.1	AioA
ROV5_48	Bacteroidota	AJF80180.1	ArsC
ROV5_48	Bacteroidota	ABO28453.1	ArsC
ROV5_48	Bacteroidota	ABO28455.1	ArsC
ROV5_48	Bacteroidota	ABO28454.1	ArsC
ROV5_48	Bacteroidota	ABO28456.1	ArsC
ROV5_4	Methylomirabilota	AVY91881.1	AioA
ROV5_4	Methylomirabilota	API83142.1	AioA
ROV5_4	Methylomirabilota	AVY91881.1	AioA
ROV5_4	Methylomirabilota	AVY91882.1	AioA
ROV5_4	Methylomirabilota	AVY91883.1	AioA
ROV5_4	Methylomirabilota	AUN86606.1	AioA
ROV5_4	Methylomirabilota	AVY91882.1	AioA
ROV5_4	Methylomirabilota	API83142.1	AioA
ROV5_4	Methylomirabilota	AVY91883.1	AioA
ROV5_4	Methylomirabilota	AVY91881.1	AioA
ROV5_50	Proteobacteria	AJF80180.1	ArsC
ROV5_50	Proteobacteria	ABO28453.1	ArsC
ROV5_50	Proteobacteria	ABO28455.1	ArsC
ROV5_50	Proteobacteria	ABO28454.1	ArsC
ROV5_50	Proteobacteria	ABO28456.1	ArsC
ROV5_52	Acidobacteriota	AVY91883.1	AioA
ROV5_52	Acidobacteriota	API83142.1	AioA
ROV5_52	Acidobacteriota	AVY91881.1	AioA
ROV5_52	Acidobacteriota	API83142.1	AioA
ROV5_53	Acidobacteriota	AVY91883.1	AioA
ROV5_53	Acidobacteriota	AVY91882.1	AioA
ROV5_53	Acidobacteriota	API83142.1	AioA
ROV5_53	Acidobacteriota	AVY91881.1	AioA
ROV5_53	Acidobacteriota	AUN86606.1	AioA
ROV5_53	Acidobacteriota	AVY91883.1	AioA
ROV5_54	Proteobacteria	AJF80180.1	ArsC
ROV5_54	Proteobacteria	ABO28453.1	ArsC
ROV5_54	Proteobacteria	ABO28455.1	ArsC
ROV5_54	Proteobacteria	ABO28454.1	ArsC
ROV5_54	Proteobacteria	ABO28456.1	ArsC
ROV5_55	Proteobacteria	AJF80180.1	ArsC
ROV5_55	Proteobacteria	ABO28453.1	ArsC
ROV5_55	Proteobacteria	ABO28455.1	ArsC
ROV5_55	Proteobacteria	ABO28454.1	ArsC
ROV5_55	Proteobacteria	ABO28456.1	ArsC
ROV5_58	Proteobacteria	AJF80180.1	ArsC
ROV5_58	Proteobacteria	ABO28453.1	ArsC
ROV5_58	Proteobacteria	ABO28455.1	ArsC
ROV5_58	Proteobacteria	ABO28454.1	ArsC
ROV5_58	Proteobacteria	ABO28456.1	ArsC
ROV5_59	Proteobacteria	API83142.1	AioA
ROV5_59	Proteobacteria	AVY91882.1	AioA
ROV5_59	Proteobacteria	AVY91883.1	AioA
ROV5_59	Proteobacteria	AVY91881.1	AioA
ROV5_59	Proteobacteria	AVY91883.1	AioA
ROV5_59	Proteobacteria	API83142.1	AioA
ROV5_59	Proteobacteria	AVY91882.1	AioA
ROV5_59	Proteobacteria	AJF80180.1	ArsC
ROV5_59	Proteobacteria	ABO28453.1	ArsC
ROV5_59	Proteobacteria	ABO28455.1	ArsC
ROV5_59	Proteobacteria	ABO28454.1	ArsC
ROV5_59	Proteobacteria	ABO28456.1	ArsC
ROV5_59	Proteobacteria	AVY91882.1	AioA
ROV5_59	Proteobacteria	AVY91881.1	AioA
ROV5_59	Proteobacteria	AVY91883.1	AioA
ROV5_60	Acidobacteriota	AUN86606.1	AioA
ROV5_60	Acidobacteriota	API83142.1	AioA
ROV5_62	Chloroflexota	API83142.1	AioA
ROV5_62	Chloroflexota	AUN86606.1	AioA
ROV5_62	Chloroflexota	ABO28453.1	ArsC
ROV5_62	Chloroflexota	ABO28455.1	ArsC
ROV5_62	Chloroflexota	ABO28454.1	ArsC
ROV5_62	Chloroflexota	ABO28456.1	ArsC
ROV5_62	Chloroflexota	AJF80180.1	ArsC
ROV5_64	Proteobacteria	AJF80180.1	ArsC
ROV5_64	Proteobacteria	ABO28453.1	ArsC
ROV5_64	Proteobacteria	ABO28455.1	ArsC
ROV5_64	Proteobacteria	ABO28454.1	ArsC
ROV5_64	Proteobacteria	ABO28456.1	ArsC
ROV5_65	Proteobacteria	AJF80180.1	ArsC
ROV5_65	Proteobacteria	ABO28453.1	ArsC
ROV5_65	Proteobacteria	ABO28455.1	ArsC
ROV5_65	Proteobacteria	ABO28454.1	ArsC
ROV5_65	Proteobacteria	ABO28456.1	ArsC
ROV5_66	Proteobacteria	API83142.1	AioA
ROV5_66	Proteobacteria	AVY91883.1	AioA
ROV5_66	Proteobacteria	AVY91882.1	AioA
ROV5_66	Proteobacteria	AJF80180.1	ArsC
ROV5_66	Proteobacteria	ABO28453.1	ArsC
ROV5_66	Proteobacteria	ABO28455.1	ArsC
ROV5_66	Proteobacteria	ABO28454.1	ArsC
ROV5_66	Proteobacteria	ABO28456.1	ArsC
ROV5_69	Proteobacteria	AVY91882.1	AioA
ROV5_69	Proteobacteria	AVY91883.1	AioA
ROV5_69	Proteobacteria	AVY91881.1	AioA
ROV5_71	Nitrospirota	AVY91883.1	AioA
ROV5_72	Proteobacteria	AJF80180.1	ArsC
ROV5_72	Proteobacteria	ABO28453.1	ArsC
ROV5_72	Proteobacteria	ABO28455.1	ArsC
ROV5_72	Proteobacteria	ABO28454.1	ArsC
ROV5_72	Proteobacteria	ABO28456.1	ArsC
ROV5_72	Proteobacteria	API83142.1	AioA
ROV5_72	Proteobacteria	AVY91882.1	AioA
ROV5_72	Proteobacteria	AVY91881.1	AioA
ROV5_72	Proteobacteria	AVY91883.1	AioA
ROV5_72	Proteobacteria	AVY91883.1	AioA
ROV5_72	Proteobacteria	AVY91882.1	AioA
ROV5_72	Proteobacteria	AVY91881.1	AioA
ROV5_72	Proteobacteria	AVY91882.1	AioA
ROV5_72	Proteobacteria	API83142.1	AioA
ROV5_72	Proteobacteria	AVY91883.1	AioA
ROV5_72	Proteobacteria	AVY91881.1	AioA
ROV5_73	Thermoproteota	ABO28453.1	ArsC
ROV5_73	Thermoproteota	ABO28455.1	ArsC
ROV5_73	Thermoproteota	ABO28454.1	ArsC
ROV5_73	Thermoproteota	ABO28456.1	ArsC
ROV5_73	Thermoproteota	AJF80180.1	ArsC
ROV5_73	Thermoproteota	AVY91883.1	AioA
ROV5_73	Thermoproteota	AVY91882.1	AioA
ROV5_73	Thermoproteota	AUN86606.1	AioA
ROV5_73	Thermoproteota	API83142.1	AioA
ROV5_76	Proteobacteria	AVY91882.1	AioA
ROV5_76	Proteobacteria	AVY91883.1	AioA
ROV5_76	Proteobacteria	AVY91881.1	AioA
ROV5_76	Proteobacteria	API83142.1	AioA
ROV5_77	Proteobacteria	AVY91882.1	AioA
ROV5_77	Proteobacteria	API83142.1	AioA
ROV5_77	Proteobacteria	AVY91883.1	AioA
ROV5_77	Proteobacteria	AVY91881.1	AioA
ROV5_77	Proteobacteria	AJF80180.1	ArsC
ROV5_77	Proteobacteria	ABO28453.1	ArsC
ROV5_77	Proteobacteria	ABO28455.1	ArsC
ROV5_77	Proteobacteria	ABO28454.1	ArsC
ROV5_77	Proteobacteria	ABO28456.1	ArsC
ROV5_79	Chloroflexota	API83142.1	AioA
ROV5_79	Chloroflexota	AUN86606.1	AioA
ROV5_81	Proteobacteria	AVY91882.1	AioA
ROV5_81	Proteobacteria	API83142.1	AioA
ROV5_81	Proteobacteria	AVY91883.1	AioA
ROV5_81	Proteobacteria	AVY91881.1	AioA
ROV5_81	Proteobacteria	AVY91882.1	AioA
ROV5_81	Proteobacteria	AVY91883.1	AioA
ROV5_81	Proteobacteria	AVY91881.1	AioA
ROV5_84	Planctomycetota	API83142.1	AioA
ROV5_84	Planctomycetota	AVY91882.1	AioA
ROV5_84	Planctomycetota	AVY91883.1	AioA
ROV5_84	Planctomycetota	API83142.1	AioA
ROV5_87	Desulfobacterota_B	AVY91883.1	AioA
ROV5_87	Desulfobacterota_B	AVY91881.1	AioA
ROV5_94	Proteobacteria	AVY91883.1	AioA
ROV5_94	Proteobacteria	AVY91883.1	AioA
ROV5_94	Proteobacteria	AVY91881.1	AioA
ROV5_94	Proteobacteria	AVY91882.1	AioA
ROV5_94	Proteobacteria	API83142.1	AioA
ROV5_94	Proteobacteria	AVY91883.1	AioA
ROV5_94	Proteobacteria	AVY91881.1	AioA
ROV5_94	Proteobacteria	AVY91882.1	AioA
ROV5_94	Proteobacteria	API83142.1	AioA
ROV5_9	Proteobacteria	API83142.1	AioA
ROV5_9	Proteobacteria	AVY91883.1	AioA
ROV5_9	Proteobacteria	AVY91882.1	AioA
ROV5_9	Proteobacteria	AVY91882.1	AioA
9CJW_11	Proteobacteria	CAD6007270.1	NemA
9CJW_11	Proteobacteria	CAD6013253.1	NemA
9CJW_11	Proteobacteria	ACN14121.1	NemA
9CJW_11	Proteobacteria	CAE7035110.1	NemA
9CJW_11	Proteobacteria	CAE7035110.1	NemA
9CJW_11	Proteobacteria	CAD6007270.1	NemA
9CJW_11	Proteobacteria	CAD6013253.1	NemA
9CJW_11	Proteobacteria	ACN14121.1	NemA
9CJW_11	Proteobacteria	CAD6013253.1	NemA
9CJW_11	Proteobacteria	CAD6007270.1	NemA
9CJW_11	Proteobacteria	CAE7035110.1	NemA
9CJW_11	Proteobacteria	ACN14121.1	NemA
9CJW_11	Proteobacteria	CAD6007270.1	NemA
9CJW_11	Proteobacteria	CAD6013253.1	NemA
9CJW_11	Proteobacteria	ACN14121.1	NemA
9CJW_11	Proteobacteria	CAE7035110.1	NemA
9CJW_11	Proteobacteria	CAD6007270.1	NemA
9CJW_11	Proteobacteria	CAD6013253.1	NemA
9CJW_11	Proteobacteria	ACN14121.1	NemA
9CJW_11	Proteobacteria	CAE7035110.1	NemA
9CJW_11	Proteobacteria	CAE7035110.1	NemA
9CJW_11	Proteobacteria	CAD6013253.1	NemA
9CJW_11	Proteobacteria	CAD6007270.1	NemA
9CJW_11	Proteobacteria	ACN14121.1	NemA
9CJW_11	Proteobacteria	ALI26123.1	ChrR
9CJW_11	Proteobacteria	ALI26123.1	ChrR
9CJW_11	Proteobacteria	CAD6013253.1	NemA
9CJW_11	Proteobacteria	CAD6007270.1	NemA
9CJW_11	Proteobacteria	CAE7035110.1	NemA
9CJW_11	Proteobacteria	ACN14121.1	NemA
9CJW_11	Proteobacteria	AEC46826.1	ChrR
9CJW_11	Proteobacteria	CAD6007270.1	NemA
9CJW_11	Proteobacteria	CAD6013253.1	NemA
9CJW_11	Proteobacteria	CAE7035110.1	NemA
9CJW_11	Proteobacteria	ACN14121.1	NemA
9CJW_11	Proteobacteria	CAE7035110.1	NemA
9CJW_11	Proteobacteria	CAD6007270.1	NemA
9CJW_11	Proteobacteria	CAD6013253.1	NemA
9CJW_11	Proteobacteria	ACN14121.1	NemA
9CJW_11	Proteobacteria	CAE7035110.1	NemA
9CJW_11	Proteobacteria	CAD6007270.1	NemA
9CJW_11	Proteobacteria	CAD6013253.1	NemA
9CJW_11	Proteobacteria	ACN14121.1	NemA
9CJW_11	Proteobacteria	ACN14121.1	NemA
9CJW_11	Proteobacteria	CAD6013253.1	NemA
9CJW_11	Proteobacteria	CAD6007270.1	NemA
9CJW_11	Proteobacteria	CAE7035110.1	NemA
9CJW_11	Proteobacteria	CAE7787391.1	NemA
9CJW_11	Proteobacteria	ACN14121.1	NemA
9CJW_11	Proteobacteria	CAE7035110.1	NemA
9CJW_11	Proteobacteria	CAD6013253.1	NemA
9CJW_11	Proteobacteria	CAD6007270.1	NemA
9CJW_11	Proteobacteria	CAE7035110.1	NemA
9CJW_11	Proteobacteria	ACN14121.1	NemA
9CJW_11	Proteobacteria	CAD6013253.1	NemA
9CJW_11	Proteobacteria	CAD6007270.1	NemA
9CJW_11	Proteobacteria	CAD6013253.1	NemA
9CJW_11	Proteobacteria	CAD6007270.1	NemA
9CJW_11	Proteobacteria	ACN14121.1	NemA
9CJW_11	Proteobacteria	CAE7035110.1	NemA
9CJW_12	Proteobacteria	ACN14121.1	NemA
9CJW_12	Proteobacteria	CAD6007270.1	NemA
9CJW_12	Proteobacteria	CAD6013253.1	NemA
9CJW_12	Proteobacteria	CAE7035110.1	NemA
9CJW_12	Proteobacteria	CAE7787391.1	NemA
9CJW_12	Proteobacteria	VWQ03500.1	ChrR
9CJW_12	Proteobacteria	ADR59378.1	ChrR
9CJW_13	Acidobacteriota	VWQ03500.1	ChrR
9CJW_13	Acidobacteriota	ADR59378.1	ChrR
9CJW_14	Proteobacteria	ALI26123.1	ChrR
9CJW_22	Proteobacteria	CAD6013253.1	NemA
9CJW_22	Proteobacteria	CAD6007270.1	NemA
9CJW_22	Proteobacteria	ACN14121.1	NemA
9CJW_22	Proteobacteria	CAE7035110.1	NemA
9CJW_22	Proteobacteria	CAE7787391.1	NemA
9CJW_22	Proteobacteria	ACN14121.1	NemA
9CJW_22	Proteobacteria	CAE7035110.1	NemA
9CJW_22	Proteobacteria	CAD6013253.1	NemA
9CJW_22	Proteobacteria	CAD6007270.1	NemA
9CJW_22	Proteobacteria	CAE7787391.1	NemA
9CJW_22	Proteobacteria	ALI26123.1	ChrR
9CJW_22	Proteobacteria	ALI26123.1	ChrR
9CJW_22	Proteobacteria	CAD6007270.1	NemA
9CJW_22	Proteobacteria	CAD6013253.1	NemA
9CJW_22	Proteobacteria	ACN14121.1	NemA
9CJW_22	Proteobacteria	CAE7035110.1	NemA
9CJW_22	Proteobacteria	CAE7787391.1	NemA
9CJW_22	Proteobacteria	VWQ03500.1	ChrR
9CJW_22	Proteobacteria	ADR59378.1	ChrR
9CJW_22	Proteobacteria	CAE7035110.1	NemA
9CJW_22	Proteobacteria	ACN14121.1	NemA
9CJW_22	Proteobacteria	CAD6013253.1	NemA
9CJW_22	Proteobacteria	CAD6007270.1	NemA
9CJW_22	Proteobacteria	CAD6007270.1	NemA
9CJW_22	Proteobacteria	CAD6013253.1	NemA
9CJW_22	Proteobacteria	ACN14121.1	NemA
9CJW_22	Proteobacteria	CAE7035110.1	NemA
9CJW_22	Proteobacteria	CAE7787391.1	NemA
9CJW_22	Proteobacteria	CAD6007270.1	NemA
9CJW_22	Proteobacteria	CAD6013253.1	NemA
9CJW_22	Proteobacteria	ACN14121.1	NemA
9CJW_22	Proteobacteria	CAE7035110.1	NemA
9CJW_22	Proteobacteria	CAD6013253.1	NemA
9CJW_22	Proteobacteria	CAD6007270.1	NemA
9CJW_22	Proteobacteria	CAE7035110.1	NemA
9CJW_22	Proteobacteria	ACN14121.1	NemA
9CJW_22	Proteobacteria	CAE7787391.1	NemA
9CJW_22	Proteobacteria	CAD6007270.1	NemA
9CJW_22	Proteobacteria	CAD6013253.1	NemA
9CJW_22	Proteobacteria	CAE7035110.1	NemA
9CJW_22	Proteobacteria	ACN14121.1	NemA
9CJW_22	Proteobacteria	CAE7035110.1	NemA
9CJW_22	Proteobacteria	ACN14121.1	NemA
9CJW_22	Proteobacteria	CAD6013253.1	NemA
9CJW_22	Proteobacteria	CAD6007270.1	NemA
9CJW_22	Proteobacteria	CAE7787391.1	NemA
9CJW_24	Nitrospinota	VWQ03500.1	ChrR
9CJW_24	Nitrospinota	ADR59378.1	ChrR
9CJW_28	Proteobacteria	CAE7035110.1	NemA
9CJW_28	Proteobacteria	ACN14121.1	NemA
9CJW_28	Proteobacteria	CAD6013253.1	NemA
9CJW_28	Proteobacteria	CAD6007270.1	NemA
9CJW_28	Proteobacteria	CAE7787391.1	NemA
9CJW_28	Proteobacteria	CAD6007270.1	NemA
9CJW_28	Proteobacteria	CAD6013253.1	NemA
9CJW_28	Proteobacteria	CAE7035110.1	NemA
9CJW_28	Proteobacteria	ACN14121.1	NemA
9CJW_28	Proteobacteria	ACN14121.1	NemA
9CJW_28	Proteobacteria	CAD6013253.1	NemA
9CJW_28	Proteobacteria	CAD6007270.1	NemA
9CJW_28	Proteobacteria	CAE7035110.1	NemA
9CJW_28	Proteobacteria	ADR59378.1	ChrR
9CJW_2	Proteobacteria	CAD6013253.1	NemA
9CJW_2	Proteobacteria	CAD6007270.1	NemA
9CJW_2	Proteobacteria	CAE7035110.1	NemA
9CJW_2	Proteobacteria	ACN14121.1	NemA
9CJW_2	Proteobacteria	CAE7787391.1	NemA
9CJW_2	Proteobacteria	ACN14121.1	NemA
9CJW_2	Proteobacteria	CAE7035110.1	NemA
9CJW_2	Proteobacteria	CAD6007270.1	NemA
9CJW_2	Proteobacteria	CAD6013253.1	NemA
9CJW_30	Gemmatimonadota	ADR59378.1	ChrR
9CJW_30	Gemmatimonadota	VWQ03500.1	ChrR
9CJW_30	Gemmatimonadota	CAD6013253.1	NemA
9CJW_30	Gemmatimonadota	ACN14121.1	NemA
9CJW_30	Gemmatimonadota	CAD6007270.1	NemA
9CJW_30	Gemmatimonadota	CAE7035110.1	NemA
9CJW_30	Gemmatimonadota	CAE7787391.1	NemA
9CJW_33	KSB1	VWQ03500.1	ChrR
9CJW_33	KSB1	ADR59378.1	ChrR
9CJW_33	KSB1	ACN14121.1	NemA
9CJW_33	KSB1	CAD6007270.1	NemA
9CJW_33	KSB1	CAE7035110.1	NemA
9CJW_33	KSB1	CAD6013253.1	NemA
9CJW_33	KSB1	CAE7787391.1	NemA
9CJW_33	KSB1	ACN14121.1	NemA
9CJW_33	KSB1	CAD6013253.1	NemA
9CJW_33	KSB1	CAD6007270.1	NemA
9CJW_33	KSB1	CAE7035110.1	NemA
9CJW_33	KSB1	ACN14121.1	NemA
9CJW_33	KSB1	CAD6007270.1	NemA
9CJW_33	KSB1	CAE7035110.1	NemA
9CJW_33	KSB1	CAD6013253.1	NemA
9CJW_33	KSB1	CAE7787391.1	NemA
9CJW_34	Proteobacteria	CAD6007270.1	NemA
9CJW_34	Proteobacteria	CAD6013253.1	NemA
9CJW_34	Proteobacteria	CAE7035110.1	NemA
9CJW_34	Proteobacteria	ACN14121.1	NemA
9CJW_34	Proteobacteria	CAE7787391.1	NemA
9CJW_34	Proteobacteria	CAD6007270.1	NemA
9CJW_34	Proteobacteria	CAD6013253.1	NemA
9CJW_34	Proteobacteria	CAE7035110.1	NemA
9CJW_34	Proteobacteria	ACN14121.1	NemA
9CJW_34	Proteobacteria	ADR59378.1	ChrR
9CJW_34	Proteobacteria	VWQ03500.1	ChrR
9CJW_34	Proteobacteria	CAE7035110.1	NemA
9CJW_34	Proteobacteria	CAD6007270.1	NemA
9CJW_34	Proteobacteria	CAD6013253.1	NemA
9CJW_34	Proteobacteria	CAD6013253.1	NemA
9CJW_34	Proteobacteria	CAD6007270.1	NemA
9CJW_34	Proteobacteria	ACN14121.1	NemA
9CJW_34	Proteobacteria	CAE7035110.1	NemA
9CJW_34	Proteobacteria	ACN14121.1	NemA
9CJW_34	Proteobacteria	CAD6013253.1	NemA
9CJW_34	Proteobacteria	CAD6007270.1	NemA
9CJW_34	Proteobacteria	CAE7035110.1	NemA
9CJW_34	Proteobacteria	VWQ03500.1	ChrR
9CJW_35	Chloroflexota	VWQ03500.1	ChrR
9CJW_44	Acidobacteriota	VWQ03500.1	ChrR
9CJW_44	Acidobacteriota	ADR59378.1	ChrR
9CJW_44	Acidobacteriota	CAD6013253.1	NemA
9CJW_44	Acidobacteriota	CAD6007270.1	NemA
9CJW_44	Acidobacteriota	ACN14121.1	NemA
9CJW_44	Acidobacteriota	CAE7035110.1	NemA
9CJW_44	Acidobacteriota	CAE7035110.1	NemA
9CJW_44	Acidobacteriota	CAD6007270.1	NemA
9CJW_44	Acidobacteriota	CAD6013253.1	NemA
9CJW_44	Acidobacteriota	ACN14121.1	NemA
9CJW_44	Acidobacteriota	VWQ03500.1	ChrR
9CJW_44	Acidobacteriota	ADR59378.1	ChrR
9CJW_44	Acidobacteriota	CAD6013253.1	NemA
9CJW_44	Acidobacteriota	CAD6007270.1	NemA
9CJW_44	Acidobacteriota	ACN14121.1	NemA
9CJW_44	Acidobacteriota	CAE7035110.1	NemA
9CJW_44	Acidobacteriota	CAE7787391.1	NemA
9CJW_45	Thermoproteota	VWQ03500.1	ChrR
9CJW_45	Thermoproteota	ADR59378.1	ChrR
9CJW_45	Thermoproteota	VWQ03500.1	ChrR
9CJW_45	Thermoproteota	VWQ03500.1	ChrR
9CJW_47	Proteobacteria	CAE7035110.1	NemA
9CJW_47	Proteobacteria	CAD6013253.1	NemA
9CJW_47	Proteobacteria	CAD6007270.1	NemA
9CJW_47	Proteobacteria	ACN14121.1	NemA
9CJW_47	Proteobacteria	CAD6007270.1	NemA
9CJW_47	Proteobacteria	CAD6013253.1	NemA
9CJW_47	Proteobacteria	CAE7035110.1	NemA
9CJW_47	Proteobacteria	ACN14121.1	NemA
9CJW_47	Proteobacteria	ALI26123.1	ChrR
9CJW_47	Proteobacteria	ACN14121.1	NemA
9CJW_47	Proteobacteria	CAD6013253.1	NemA
9CJW_47	Proteobacteria	CAE7035110.1	NemA
9CJW_47	Proteobacteria	CAD6007270.1	NemA
9CJW_47	Proteobacteria	CAD6007270.1	NemA
9CJW_47	Proteobacteria	CAD6013253.1	NemA
9CJW_47	Proteobacteria	ACN14121.1	NemA
9CJW_47	Proteobacteria	CAE7035110.1	NemA
9CJW_48	Proteobacteria	CAD6007270.1	NemA
9CJW_48	Proteobacteria	CAD6013253.1	NemA
9CJW_48	Proteobacteria	ACN14121.1	NemA
9CJW_48	Proteobacteria	CAE7035110.1	NemA
9CJW_49	Hydrogenedentota	ADR59378.1	ChrR
9CJW_49	Hydrogenedentota	VWQ03500.1	ChrR
9CJW_49	Hydrogenedentota	ACN14121.1	NemA
9CJW_49	Hydrogenedentota	CAD6013253.1	NemA
9CJW_49	Hydrogenedentota	CAD6007270.1	NemA
9CJW_49	Hydrogenedentota	CAE7035110.1	NemA
9CJW_49	Hydrogenedentota	CAE7787391.1	NemA
9CJW_4	Nitrospirota	ADR59378.1	ChrR
9CJW_4	Nitrospirota	VWQ03500.1	ChrR
9CJW_58	Gemmatimonadota	CAD6013253.1	NemA
9CJW_58	Gemmatimonadota	CAD6007270.1	NemA
9CJW_58	Gemmatimonadota	ACN14121.1	NemA
9CJW_58	Gemmatimonadota	CAE7035110.1	NemA
9CJW_58	Gemmatimonadota	CAD6007270.1	NemA
9CJW_58	Gemmatimonadota	CAD6013253.1	NemA
9CJW_58	Gemmatimonadota	CAE7035110.1	NemA
9CJW_58	Gemmatimonadota	ACN14121.1	NemA
9CJW_58	Gemmatimonadota	CAE7787391.1	NemA
9CJW_58	Gemmatimonadota	VWQ03500.1	ChrR
9CJW_58	Gemmatimonadota	ADR59378.1	ChrR
9CJW_5	Proteobacteria	VWQ03500.1	ChrR
9CJW_5	Proteobacteria	ADR59378.1	ChrR
9CJW_63	Myxococcota_A	CAD6007270.1	NemA
9CJW_63	Myxococcota_A	CAD6013253.1	NemA
9CJW_63	Myxococcota_A	ACN14121.1	NemA
9CJW_63	Myxococcota_A	CAE7035110.1	NemA
9CJW_63	Myxococcota_A	CAD6013253.1	NemA
9CJW_63	Myxococcota_A	CAD6007270.1	NemA
9CJW_63	Myxococcota_A	ACN14121.1	NemA
9CJW_63	Myxococcota_A	CAE7035110.1	NemA
9CJW_63	Myxococcota_A	CAE7787391.1	NemA
9CJW_64	Proteobacteria	CAD6013253.1	NemA
9CJW_64	Proteobacteria	CAD6007270.1	NemA
9CJW_64	Proteobacteria	ACN14121.1	NemA
9CJW_64	Proteobacteria	CAE7035110.1	NemA
9CJW_64	Proteobacteria	CAE7035110.1	NemA
9CJW_64	Proteobacteria	ACN14121.1	NemA
9CJW_64	Proteobacteria	CAD6007270.1	NemA
9CJW_64	Proteobacteria	CAD6013253.1	NemA
9CJW_65	Acidobacteriota	CAD6007270.1	NemA
9CJW_65	Acidobacteriota	CAD6013253.1	NemA
9CJW_65	Acidobacteriota	CAE7035110.1	NemA
9CJW_65	Acidobacteriota	ACN14121.1	NemA
9CJW_66	Gemmatimonadota	CAD6013253.1	NemA
9CJW_66	Gemmatimonadota	CAD6007270.1	NemA
9CJW_66	Gemmatimonadota	ACN14121.1	NemA
9CJW_66	Gemmatimonadota	CAE7035110.1	NemA
9CJW_66	Gemmatimonadota	CAD6013253.1	NemA
9CJW_66	Gemmatimonadota	CAD6007270.1	NemA
9CJW_66	Gemmatimonadota	ACN14121.1	NemA
9CJW_66	Gemmatimonadota	CAE7035110.1	NemA
9CJW_66	Gemmatimonadota	CAE7787391.1	NemA
9CJW_66	Gemmatimonadota	ADR59378.1	ChrR
9CJW_66	Gemmatimonadota	VWQ03500.1	ChrR
9CJW_67	Acidobacteriota	VWQ03500.1	ChrR
9CJW_67	Acidobacteriota	ADR59378.1	ChrR
9CJW_68	Actinobacteriota	CAD6007270.1	NemA
9CJW_68	Actinobacteriota	CAD6013253.1	NemA
9CJW_68	Actinobacteriota	CAE7035110.1	NemA
9CJW_68	Actinobacteriota	ACN14121.1	NemA
9CJW_68	Actinobacteriota	VWQ03500.1	ChrR
9CJW_68	Actinobacteriota	ADR59378.1	ChrR
9CJW_68	Actinobacteriota	ADR59378.1	ChrR
9CJW_68	Actinobacteriota	VWQ03500.1	ChrR
9CJW_68	Actinobacteriota	VWQ03500.1	ChrR
9CJW_68	Actinobacteriota	ADR59378.1	ChrR
9CJW_68	Actinobacteriota	ADR59378.1	ChrR
9CJW_68	Actinobacteriota	VWQ03500.1	ChrR
9CJW_68	Actinobacteriota	ADR59378.1	ChrR
9CJW_6	Proteobacteria	CAE7035110.1	NemA
9CJW_6	Proteobacteria	CAD6013253.1	NemA
9CJW_6	Proteobacteria	CAD6007270.1	NemA
9CJW_6	Proteobacteria	CAE7787391.1	NemA
9CJW_6	Proteobacteria	ACN14121.1	NemA
9CJW_6	Proteobacteria	CAE7035110.1	NemA
9CJW_6	Proteobacteria	CAE7035110.1	NemA
9CJW_6	Proteobacteria	ACN14121.1	NemA
9CJW_6	Proteobacteria	CAD6013253.1	NemA
9CJW_6	Proteobacteria	CAD6007270.1	NemA
9CJW_6	Proteobacteria	ADR59378.1	ChrR
9CJW_6	Proteobacteria	VWQ03500.1	ChrR
9CJW_6	Proteobacteria	CAD6007270.1	NemA
9CJW_6	Proteobacteria	CAD6013253.1	NemA
9CJW_6	Proteobacteria	CAD6007270.1	NemA
9CJW_6	Proteobacteria	CAD6013253.1	NemA
9CJW_6	Proteobacteria	CAE7035110.1	NemA
9CJW_6	Proteobacteria	ACN14121.1	NemA
9CJW_6	Proteobacteria	CAE7035110.1	NemA
9CJW_6	Proteobacteria	ACN14121.1	NemA
9CJW_6	Proteobacteria	CAD6007270.1	NemA
9CJW_6	Proteobacteria	CAD6013253.1	NemA
9CJW_6	Proteobacteria	AEC46826.1	ChrR
9CJW_6	Proteobacteria	CAE7035110.1	NemA
9CJW_6	Proteobacteria	ACN14121.1	NemA
9CJW_6	Proteobacteria	CAD6007270.1	NemA
9CJW_6	Proteobacteria	CAD6013253.1	NemA
9CJW_6	Proteobacteria	VWQ03500.1	ChrR
9CJW_6	Proteobacteria	ADR59378.1	ChrR
9CJW_6	Proteobacteria	VWQ03500.1	ChrR
9CJW_6	Proteobacteria	ADR59378.1	ChrR
9CJW_6	Proteobacteria	CAD6007270.1	NemA
9CJW_6	Proteobacteria	CAD6013253.1	NemA
9CJW_6	Proteobacteria	CAE7035110.1	NemA
9CJW_6	Proteobacteria	ACN14121.1	NemA
9CJW_70	Proteobacteria	CAD6007270.1	NemA
9CJW_70	Proteobacteria	CAD6013253.1	NemA
9CJW_70	Proteobacteria	ACN14121.1	NemA
9CJW_70	Proteobacteria	CAE7035110.1	NemA
9CJW_70	Proteobacteria	CAE7787391.1	NemA
9CJW_78	Proteobacteria	CAD6013253.1	NemA
9CJW_78	Proteobacteria	CAD6007270.1	NemA
9CJW_78	Proteobacteria	CAE7035110.1	NemA
9CJW_78	Proteobacteria	ACN14121.1	NemA
9CJW_78	Proteobacteria	CAE7787391.1	NemA
9CJW_79	Gemmatimonadota	VWQ03500.1	ChrR
9CJW_79	Gemmatimonadota	ADR59378.1	ChrR
9CJW_79	Gemmatimonadota	CAD6013253.1	NemA
9CJW_79	Gemmatimonadota	CAD6007270.1	NemA
9CJW_79	Gemmatimonadota	ACN14121.1	NemA
9CJW_79	Gemmatimonadota	CAE7035110.1	NemA
9CJW_79	Gemmatimonadota	CAE7787391.1	NemA
9CJW_80	UBA10199	VWQ03500.1	ChrR
9CJW_80	UBA10199	ADR59378.1	ChrR
9CJW_81	Proteobacteria	CAD6013253.1	NemA
9CJW_81	Proteobacteria	CAD6007270.1	NemA
9CJW_81	Proteobacteria	ACN14121.1	NemA
9CJW_81	Proteobacteria	CAE7035110.1	NemA
9CJW_81	Proteobacteria	CAD6013253.1	NemA
9CJW_81	Proteobacteria	CAD6007270.1	NemA
9CJW_81	Proteobacteria	ACN14121.1	NemA
9CJW_81	Proteobacteria	CAE7035110.1	NemA
9CJW_81	Proteobacteria	CAE7787391.1	NemA
9CJW_81	Proteobacteria	CAD6013253.1	NemA
9CJW_81	Proteobacteria	CAD6007270.1	NemA
9CJW_81	Proteobacteria	ACN14121.1	NemA
9CJW_81	Proteobacteria	CAE7035110.1	NemA
9CJW_81	Proteobacteria	CAE7787391.1	NemA
9CJW_81	Proteobacteria	CAE7787391.1	NemA
9CJW_81	Proteobacteria	ACN14121.1	NemA
9CJW_81	Proteobacteria	CAE7035110.1	NemA
9CJW_81	Proteobacteria	CAD6013253.1	NemA
9CJW_81	Proteobacteria	CAD6007270.1	NemA
9CJW_83	Desulfobacterota_B	AEC46826.1	ChrR
9CJW_83	Desulfobacterota_B	CAE7035110.1	NemA
9CJW_83	Desulfobacterota_B	CAD6013253.1	NemA
9CJW_83	Desulfobacterota_B	CAD6007270.1	NemA
9CJW_83	Desulfobacterota_B	ACN14121.1	NemA
9CJW_83	Desulfobacterota_B	CAE7787391.1	NemA
9CJW_83	Desulfobacterota_B	VWQ03500.1	ChrR
9CJW_83	Desulfobacterota_B	ADR59378.1	ChrR
9CJW_84	Planctomycetota	CAE7035110.1	NemA
9CJW_84	Planctomycetota	ADR59378.1	ChrR
9CJW_84	Planctomycetota	VWQ03500.1	ChrR
9CJW_87	Gemmatimonadota	ADR59378.1	ChrR
9CJW_87	Gemmatimonadota	VWQ03500.1	ChrR
9CJW_89	Gemmatimonadota	ADR59378.1	ChrR
9CJW_89	Gemmatimonadota	VWQ03500.1	ChrR
9CJW_89	Gemmatimonadota	ADR59378.1	ChrR
9CJW_89	Gemmatimonadota	VWQ03500.1	ChrR
9CJW_89	Gemmatimonadota	CAD6013253.1	NemA
9CJW_89	Gemmatimonadota	CAD6007270.1	NemA
9CJW_89	Gemmatimonadota	CAE7035110.1	NemA
9CJW_89	Gemmatimonadota	ACN14121.1	NemA
9CJW_89	Gemmatimonadota	CAE7787391.1	NemA
9CJW_90	Proteobacteria	CAD6013253.1	NemA
9CJW_90	Proteobacteria	CAD6007270.1	NemA
9CJW_90	Proteobacteria	CAE7035110.1	NemA
9CJW_90	Proteobacteria	ACN14121.1	NemA
9CJW_90	Proteobacteria	CAE7787391.1	NemA
9CJW_91	Proteobacteria	CAD6007270.1	NemA
9CJW_91	Proteobacteria	CAD6013253.1	NemA
9CJW_91	Proteobacteria	CAE7035110.1	NemA
9CJW_91	Proteobacteria	ACN14121.1	NemA
9CJW_91	Proteobacteria	CAD6007270.1	NemA
9CJW_91	Proteobacteria	CAD6013253.1	NemA
9CJW_91	Proteobacteria	ACN14121.1	NemA
9CJW_91	Proteobacteria	CAE7035110.1	NemA
9CJW_92	Nitrospinota	CAE7035110.1	NemA
9CJW_92	Nitrospinota	ACN14121.1	NemA
9CJW_92	Nitrospinota	CAD6013253.1	NemA
9CJW_92	Nitrospinota	CAD6007270.1	NemA
9CJW_92	Nitrospinota	CAE7787391.1	NemA
9CJW_94	Proteobacteria	CAD6013253.1	NemA
9CJW_94	Proteobacteria	CAD6007270.1	NemA
9CJW_94	Proteobacteria	CAE7035110.1	NemA
9CJW_94	Proteobacteria	ACN14121.1	NemA
9CJW_94	Proteobacteria	ACN14121.1	NemA
9CJW_94	Proteobacteria	CAE7035110.1	NemA
9CJW_94	Proteobacteria	CAD6013253.1	NemA
9CJW_94	Proteobacteria	CAD6007270.1	NemA
9CJW_94	Proteobacteria	CAD6013253.1	NemA
9CJW_94	Proteobacteria	CAD6007270.1	NemA
9CJW_94	Proteobacteria	CAE7035110.1	NemA
9CJW_94	Proteobacteria	ACN14121.1	NemA
9CJW_94	Proteobacteria	CAE7035110.1	NemA
9CJW_94	Proteobacteria	CAD6013253.1	NemA
9CJW_94	Proteobacteria	ACN14121.1	NemA
9CJW_94	Proteobacteria	CAD6007270.1	NemA
9CJW_94	Proteobacteria	CAE7035110.1	NemA
9CJW_94	Proteobacteria	ACN14121.1	NemA
9CJW_94	Proteobacteria	CAD6013253.1	NemA
9CJW_94	Proteobacteria	CAD6007270.1	NemA
9CJW_94	Proteobacteria	VWQ03500.1	ChrR
9CJW_94	Proteobacteria	ADR59378.1	ChrR
9CJW_94	Proteobacteria	CAE7035110.1	NemA
9CJW_94	Proteobacteria	ACN14121.1	NemA
9CJW_94	Proteobacteria	CAD6007270.1	NemA
9CJW_94	Proteobacteria	CAD6013253.1	NemA
9CJW_94	Proteobacteria	CAD6007270.1	NemA
9CJW_94	Proteobacteria	CAD6013253.1	NemA
9CJW_94	Proteobacteria	ACN14121.1	NemA
9CJW_94	Proteobacteria	CAE7035110.1	NemA
9CJW_94	Proteobacteria	ACN14121.1	NemA
9CJW_94	Proteobacteria	CAD6013253.1	NemA
9CJW_94	Proteobacteria	CAD6007270.1	NemA
9CJW_94	Proteobacteria	CAE7035110.1	NemA
9CJW_94	Proteobacteria	CAE7035110.1	NemA
9CJW_94	Proteobacteria	ACN14121.1	NemA
9CJW_94	Proteobacteria	CAD6013253.1	NemA
9CJW_94	Proteobacteria	CAD6007270.1	NemA
9CJW_94	Proteobacteria	CAD6013253.1	NemA
9CJW_94	Proteobacteria	CAD6007270.1	NemA
9CJW_94	Proteobacteria	CAE7035110.1	NemA
9CJW_94	Proteobacteria	ACN14121.1	NemA
9CJW_9	KSB1	VWQ03500.1	ChrR
9CJW_9	KSB1	ADR59378.1	ChrR
9DJH_13	Thermoproteota	ALI26123.1	ChrR
9DJH_14	Proteobacteria	ACN14121.1	NemA
9DJH_14	Proteobacteria	CAE7035110.1	NemA
9DJH_14	Proteobacteria	CAD6007270.1	NemA
9DJH_14	Proteobacteria	CAD6013253.1	NemA
9DJH_14	Proteobacteria	CAE7787391.1	NemA
9DJH_14	Proteobacteria	CAE7035110.1	NemA
9DJH_14	Proteobacteria	ACN14121.1	NemA
9DJH_14	Proteobacteria	CAD6007270.1	NemA
9DJH_14	Proteobacteria	CAD6013253.1	NemA
9DJH_14	Proteobacteria	CAD6013253.1	NemA
9DJH_14	Proteobacteria	CAD6007270.1	NemA
9DJH_14	Proteobacteria	ACN14121.1	NemA
9DJH_14	Proteobacteria	CAE7035110.1	NemA
9DJH_14	Proteobacteria	CAE7035110.1	NemA
9DJH_14	Proteobacteria	CAE7787391.1	NemA
9DJH_14	Proteobacteria	CAD6013253.1	NemA
9DJH_14	Proteobacteria	ACN14121.1	NemA
9DJH_14	Proteobacteria	CAD6007270.1	NemA
9DJH_14	Proteobacteria	CAD6007270.1	NemA
9DJH_14	Proteobacteria	CAD6013253.1	NemA
9DJH_14	Proteobacteria	CAE7035110.1	NemA
9DJH_14	Proteobacteria	ACN14121.1	NemA
9DJH_14	Proteobacteria	CAE7787391.1	NemA
9DJH_14	Proteobacteria	CAD6013253.1	NemA
9DJH_14	Proteobacteria	CAD6007270.1	NemA
9DJH_14	Proteobacteria	ACN14121.1	NemA
9DJH_14	Proteobacteria	CAE7035110.1	NemA
9DJH_14	Proteobacteria	CAE7035110.1	NemA
9DJH_14	Proteobacteria	ACN14121.1	NemA
9DJH_14	Proteobacteria	CAE7035110.1	NemA
9DJH_14	Proteobacteria	CAD6013253.1	NemA
9DJH_14	Proteobacteria	CAD6007270.1	NemA
9DJH_14	Proteobacteria	CAD6007270.1	NemA
9DJH_14	Proteobacteria	CAD6013253.1	NemA
9DJH_14	Proteobacteria	ACN14121.1	NemA
9DJH_14	Proteobacteria	CAE7035110.1	NemA
9DJH_14	Proteobacteria	CAE7787391.1	NemA
9DJH_15	Proteobacteria	ADR59378.1	ChrR
9DJH_15	Proteobacteria	VWQ03500.1	ChrR
9DJH_15	Proteobacteria	ALI26123.1	ChrR
9DJH_15	Proteobacteria	ALI26123.1	ChrR
9DJH_15	Proteobacteria	CAD6007270.1	NemA
9DJH_15	Proteobacteria	CAD6013253.1	NemA
9DJH_15	Proteobacteria	ACN14121.1	NemA
9DJH_15	Proteobacteria	CAE7035110.1	NemA
9DJH_15	Proteobacteria	CAE7787391.1	NemA
9DJH_15	Proteobacteria	ACN14121.1	NemA
9DJH_15	Proteobacteria	CAE7035110.1	NemA
9DJH_15	Proteobacteria	CAD6013253.1	NemA
9DJH_15	Proteobacteria	CAD6007270.1	NemA
9DJH_15	Proteobacteria	CAE7787391.1	NemA
9DJH_15	Proteobacteria	ACN14121.1	NemA
9DJH_15	Proteobacteria	CAD6007270.1	NemA
9DJH_15	Proteobacteria	CAD6013253.1	NemA
9DJH_15	Proteobacteria	CAE7035110.1	NemA
9DJH_16	Methylomirabilota	CAD6013253.1	NemA
9DJH_16	Methylomirabilota	CAD6007270.1	NemA
9DJH_16	Methylomirabilota	ACN14121.1	NemA
9DJH_16	Methylomirabilota	CAE7035110.1	NemA
9DJH_16	Methylomirabilota	CAE7787391.1	NemA
9DJH_21	Gemmatimonadota	VWQ03500.1	ChrR
9DJH_21	Gemmatimonadota	ADR59378.1	ChrR
9DJH_21	Gemmatimonadota	CAD6013253.1	NemA
9DJH_21	Gemmatimonadota	CAD6007270.1	NemA
9DJH_21	Gemmatimonadota	CAE7035110.1	NemA
9DJH_21	Gemmatimonadota	ACN14121.1	NemA
9DJH_22	Proteobacteria	CAE7035110.1	NemA
9DJH_22	Proteobacteria	ACN14121.1	NemA
9DJH_22	Proteobacteria	CAD6013253.1	NemA
9DJH_22	Proteobacteria	CAD6007270.1	NemA
9DJH_22	Proteobacteria	CAD6013253.1	NemA
9DJH_22	Proteobacteria	CAD6007270.1	NemA
9DJH_22	Proteobacteria	CAE7035110.1	NemA
9DJH_22	Proteobacteria	ACN14121.1	NemA
9DJH_22	Proteobacteria	ACN14121.1	NemA
9DJH_22	Proteobacteria	CAD6013253.1	NemA
9DJH_22	Proteobacteria	CAD6007270.1	NemA
9DJH_22	Proteobacteria	CAD6007270.1	NemA
9DJH_22	Proteobacteria	CAD6013253.1	NemA
9DJH_22	Proteobacteria	CAE7035110.1	NemA
9DJH_22	Proteobacteria	ACN14121.1	NemA
9DJH_22	Proteobacteria	CAD6013253.1	NemA
9DJH_22	Proteobacteria	CAD6007270.1	NemA
9DJH_22	Proteobacteria	CAE7035110.1	NemA
9DJH_22	Proteobacteria	ACN14121.1	NemA
9DJH_2	Desulfobacterota_B	AEC46826.1	ChrR
9DJH_8	Proteobacteria	CAD6007270.1	NemA
9DJH_8	Proteobacteria	CAD6013253.1	NemA
9DJH_8	Proteobacteria	CAE7035110.1	NemA
9DJH_8	Proteobacteria	ACN14121.1	NemA
9DJH_8	Proteobacteria	VWQ03500.1	ChrR
9DJH_8	Proteobacteria	ADR59378.1	ChrR
9DJH_8	Proteobacteria	ACN14121.1	NemA
9DJH_8	Proteobacteria	CAD6007270.1	NemA
9DJH_8	Proteobacteria	CAD6013253.1	NemA
9DJH_8	Proteobacteria	CAE7035110.1	NemA
ROV5_103	Proteobacteria	CAD6007270.1	NemA
ROV5_103	Proteobacteria	CAD6013253.1	NemA
ROV5_103	Proteobacteria	ACN14121.1	NemA
ROV5_103	Proteobacteria	CAE7035110.1	NemA
ROV5_103	Proteobacteria	ALI26123.1	ChrR
ROV5_105	Proteobacteria	ACN14121.1	NemA
ROV5_105	Proteobacteria	ACN14121.1	NemA
ROV5_105	Proteobacteria	CAD6013253.1	NemA
ROV5_105	Proteobacteria	CAD6007270.1	NemA
ROV5_105	Proteobacteria	CAE7035110.1	NemA
ROV5_107	Actinobacteriota	ALI26123.1	ChrR
ROV5_107	Actinobacteriota	ALI26123.1	ChrR
ROV5_107	Actinobacteriota	AEC46826.1	ChrR
ROV5_108	Actinobacteriota	VWQ03500.1	ChrR
ROV5_108	Actinobacteriota	ADR59378.1	ChrR
ROV5_10	Nitrospirota	ADR59378.1	ChrR
ROV5_10	Nitrospirota	VWQ03500.1	ChrR
ROV5_12	Proteobacteria	CAD6013253.1	NemA
ROV5_12	Proteobacteria	CAD6007270.1	NemA
ROV5_12	Proteobacteria	CAE7035110.1	NemA
ROV5_12	Proteobacteria	ACN14121.1	NemA
ROV5_12	Proteobacteria	CAE7787391.1	NemA
ROV5_12	Proteobacteria	CAD6007270.1	NemA
ROV5_12	Proteobacteria	CAD6013253.1	NemA
ROV5_12	Proteobacteria	ACN14121.1	NemA
ROV5_12	Proteobacteria	CAE7035110.1	NemA
ROV5_12	Proteobacteria	CAE7787391.1	NemA
ROV5_12	Proteobacteria	CAD6007270.1	NemA
ROV5_12	Proteobacteria	CAD6013253.1	NemA
ROV5_12	Proteobacteria	CAE7035110.1	NemA
ROV5_12	Proteobacteria	ACN14121.1	NemA
ROV5_12	Proteobacteria	CAE7787391.1	NemA
ROV5_12	Proteobacteria	CAE7035110.1	NemA
ROV5_12	Proteobacteria	ACN14121.1	NemA
ROV5_12	Proteobacteria	CAD6013253.1	NemA
ROV5_12	Proteobacteria	CAD6007270.1	NemA
ROV5_12	Proteobacteria	AEC46826.1	ChrR
ROV5_12	Proteobacteria	CAD6007270.1	NemA
ROV5_12	Proteobacteria	CAD6013253.1	NemA
ROV5_12	Proteobacteria	ACN14121.1	NemA
ROV5_12	Proteobacteria	CAE7035110.1	NemA
ROV5_12	Proteobacteria	CAE7787391.1	NemA
ROV5_12	Proteobacteria	CAE7035110.1	NemA
ROV5_12	Proteobacteria	ACN14121.1	NemA
ROV5_12	Proteobacteria	CAD6013253.1	NemA
ROV5_12	Proteobacteria	CAD6007270.1	NemA
ROV5_12	Proteobacteria	CAE7787391.1	NemA
ROV5_12	Proteobacteria	CAD6013253.1	NemA
ROV5_12	Proteobacteria	CAD6007270.1	NemA
ROV5_12	Proteobacteria	ACN14121.1	NemA
ROV5_12	Proteobacteria	CAE7035110.1	NemA
ROV5_12	Proteobacteria	CAD6013253.1	NemA
ROV5_12	Proteobacteria	CAD6007270.1	NemA
ROV5_12	Proteobacteria	ACN14121.1	NemA
ROV5_12	Proteobacteria	CAE7035110.1	NemA
ROV5_12	Proteobacteria	CAD6013253.1	NemA
ROV5_12	Proteobacteria	CAD6007270.1	NemA
ROV5_12	Proteobacteria	ACN14121.1	NemA
ROV5_12	Proteobacteria	CAE7035110.1	NemA
ROV5_16	Nitrospirota	AEC46826.1	ChrR
ROV5_17	Tectomicrobia	CAD6013253.1	NemA
ROV5_17	Tectomicrobia	CAD6007270.1	NemA
ROV5_17	Tectomicrobia	CAE7035110.1	NemA
ROV5_17	Tectomicrobia	ACN14121.1	NemA
ROV5_17	Tectomicrobia	CAE7787391.1	NemA
ROV5_17	Tectomicrobia	VWQ03500.1	ChrR
ROV5_17	Tectomicrobia	ADR59378.1	ChrR
ROV5_17	Tectomicrobia	CAD6007270.1	NemA
ROV5_17	Tectomicrobia	CAD6013253.1	NemA
ROV5_17	Tectomicrobia	CAE7035110.1	NemA
ROV5_17	Tectomicrobia	ACN14121.1	NemA
ROV5_17	Tectomicrobia	CAD6007270.1	NemA
ROV5_17	Tectomicrobia	CAD6013253.1	NemA
ROV5_17	Tectomicrobia	ACN14121.1	NemA
ROV5_17	Tectomicrobia	CAE7035110.1	NemA
ROV5_18	Gemmatimonadota	CAD6013253.1	NemA
ROV5_18	Gemmatimonadota	CAD6007270.1	NemA
ROV5_18	Gemmatimonadota	ACN14121.1	NemA
ROV5_18	Gemmatimonadota	CAE7035110.1	NemA
ROV5_18	Gemmatimonadota	CAE7787391.1	NemA
ROV5_18	Gemmatimonadota	ADR59378.1	ChrR
ROV5_18	Gemmatimonadota	VWQ03500.1	ChrR
ROV5_1	Gemmatimonadota	CAD6013253.1	NemA
ROV5_1	Gemmatimonadota	CAD6007270.1	NemA
ROV5_1	Gemmatimonadota	ACN14121.1	NemA
ROV5_1	Gemmatimonadota	CAE7035110.1	NemA
ROV5_1	Gemmatimonadota	CAE7787391.1	NemA
ROV5_20	Proteobacteria	ADR59378.1	ChrR
ROV5_20	Proteobacteria	VWQ03500.1	ChrR
ROV5_20	Proteobacteria	CAD6007270.1	NemA
ROV5_20	Proteobacteria	CAD6013253.1	NemA
ROV5_20	Proteobacteria	ACN14121.1	NemA
ROV5_20	Proteobacteria	CAE7035110.1	NemA
ROV5_20	Proteobacteria	CAE7787391.1	NemA
ROV5_21	Proteobacteria	VWQ03500.1	ChrR
ROV5_21	Proteobacteria	ADR59378.1	ChrR
ROV5_24	Proteobacteria	CAD6013253.1	NemA
ROV5_24	Proteobacteria	CAD6007270.1	NemA
ROV5_24	Proteobacteria	ACN14121.1	NemA
ROV5_24	Proteobacteria	CAE7035110.1	NemA
ROV5_24	Proteobacteria	CAE7787391.1	NemA
ROV5_25	Desulfobacterota_D	AEC46826.1	ChrR
ROV5_25	Desulfobacterota_D	ALI26123.1	ChrR
ROV5_27	Proteobacteria	ALI26123.1	ChrR
ROV5_27	Proteobacteria	ADR59378.1	ChrR
ROV5_27	Proteobacteria	VWQ03500.1	ChrR
ROV5_28	Proteobacteria	CAD6007270.1	NemA
ROV5_28	Proteobacteria	CAD6013253.1	NemA
ROV5_28	Proteobacteria	ACN14121.1	NemA
ROV5_28	Proteobacteria	CAE7035110.1	NemA
ROV5_28	Proteobacteria	CAE7035110.1	NemA
ROV5_28	Proteobacteria	CAD6007270.1	NemA
ROV5_28	Proteobacteria	CAD6013253.1	NemA
ROV5_28	Proteobacteria	ACN14121.1	NemA
ROV5_28	Proteobacteria	CAD6013253.1	NemA
ROV5_28	Proteobacteria	CAD6007270.1	NemA
ROV5_28	Proteobacteria	CAE7035110.1	NemA
ROV5_28	Proteobacteria	ACN14121.1	NemA
ROV5_29	Acidobacteriota	VWQ03500.1	ChrR
ROV5_29	Acidobacteriota	ADR59378.1	ChrR
ROV5_2	Thermoproteota	ADR59378.1	ChrR
ROV5_2	Thermoproteota	VWQ03500.1	ChrR
ROV5_30	Proteobacteria	ACN14121.1	NemA
ROV5_30	Proteobacteria	CAD6013253.1	NemA
ROV5_30	Proteobacteria	CAD6007270.1	NemA
ROV5_30	Proteobacteria	CAE7035110.1	NemA
ROV5_30	Proteobacteria	CAE7787391.1	NemA
ROV5_30	Proteobacteria	ACN14121.1	NemA
ROV5_30	Proteobacteria	CAE7035110.1	NemA
ROV5_30	Proteobacteria	CAD6013253.1	NemA
ROV5_30	Proteobacteria	CAD6007270.1	NemA
ROV5_31	Thermoproteota	ADR59378.1	ChrR
ROV5_31	Thermoproteota	VWQ03500.1	ChrR
ROV5_32	Gemmatimonadota	CAD6013253.1	NemA
ROV5_32	Gemmatimonadota	CAD6007270.1	NemA
ROV5_32	Gemmatimonadota	ACN14121.1	NemA
ROV5_32	Gemmatimonadota	CAE7035110.1	NemA
ROV5_32	Gemmatimonadota	CAE7787391.1	NemA
ROV5_32	Gemmatimonadota	VWQ03500.1	ChrR
ROV5_32	Gemmatimonadota	ADR59378.1	ChrR
ROV5_33	Proteobacteria	ADR59378.1	ChrR
ROV5_33	Proteobacteria	VWQ03500.1	ChrR
ROV5_34	Proteobacteria	ADR59378.1	ChrR
ROV5_34	Proteobacteria	VWQ03500.1	ChrR
ROV5_39	Proteobacteria	CAD6013253.1	NemA
ROV5_39	Proteobacteria	CAD6007270.1	NemA
ROV5_39	Proteobacteria	ACN14121.1	NemA
ROV5_39	Proteobacteria	CAE7035110.1	NemA
ROV5_39	Proteobacteria	CAE7787391.1	NemA
ROV5_39	Proteobacteria	CAD6007270.1	NemA
ROV5_39	Proteobacteria	CAD6013253.1	NemA
ROV5_39	Proteobacteria	CAE7035110.1	NemA
ROV5_39	Proteobacteria	ACN14121.1	NemA
ROV5_3	Proteobacteria	ACN14121.1	NemA
ROV5_3	Proteobacteria	CAD6007270.1	NemA
ROV5_3	Proteobacteria	CAE7035110.1	NemA
ROV5_3	Proteobacteria	CAD6013253.1	NemA
ROV5_3	Proteobacteria	CAE7787391.1	NemA
ROV5_40	Proteobacteria	CAD6013253.1	NemA
ROV5_40	Proteobacteria	CAD6007270.1	NemA
ROV5_40	Proteobacteria	CAE7035110.1	NemA
ROV5_40	Proteobacteria	ACN14121.1	NemA
ROV5_40	Proteobacteria	CAD6007270.1	NemA
ROV5_40	Proteobacteria	CAD6013253.1	NemA
ROV5_40	Proteobacteria	ACN14121.1	NemA
ROV5_40	Proteobacteria	CAE7035110.1	NemA
ROV5_40	Proteobacteria	VWQ03500.1	ChrR
ROV5_40	Proteobacteria	ADR59378.1	ChrR
ROV5_40	Proteobacteria	ALI26123.1	ChrR
ROV5_45	Proteobacteria	CAD6013253.1	NemA
ROV5_45	Proteobacteria	CAD6007270.1	NemA
ROV5_45	Proteobacteria	CAE7035110.1	NemA
ROV5_45	Proteobacteria	ACN14121.1	NemA
ROV5_45	Proteobacteria	CAE7787391.1	NemA
ROV5_45	Proteobacteria	ALI26123.1	ChrR
ROV5_45	Proteobacteria	ALI26123.1	ChrR
ROV5_45	Proteobacteria	CAD6007270.1	NemA
ROV5_45	Proteobacteria	CAD6013253.1	NemA
ROV5_45	Proteobacteria	CAE7035110.1	NemA
ROV5_45	Proteobacteria	ACN14121.1	NemA
ROV5_47	Gemmatimonadota	CAD6007270.1	NemA
ROV5_47	Gemmatimonadota	CAD6013253.1	NemA
ROV5_47	Gemmatimonadota	CAE7035110.1	NemA
ROV5_47	Gemmatimonadota	ACN14121.1	NemA
ROV5_47	Gemmatimonadota	CAE7787391.1	NemA
ROV5_47	Gemmatimonadota	CAD6013253.1	NemA
ROV5_47	Gemmatimonadota	CAD6007270.1	NemA
ROV5_47	Gemmatimonadota	ACN14121.1	NemA
ROV5_47	Gemmatimonadota	CAE7035110.1	NemA
ROV5_50	Proteobacteria	ALI26123.1	ChrR
ROV5_50	Proteobacteria	AEC46826.1	ChrR
ROV5_52	Acidobacteriota	CAD6013253.1	NemA
ROV5_52	Acidobacteriota	CAD6007270.1	NemA
ROV5_52	Acidobacteriota	ACN14121.1	NemA
ROV5_52	Acidobacteriota	CAE7035110.1	NemA
ROV5_52	Acidobacteriota	CAE7035110.1	NemA
ROV5_52	Acidobacteriota	CAD6013253.1	NemA
ROV5_52	Acidobacteriota	CAD6007270.1	NemA
ROV5_52	Acidobacteriota	ACN14121.1	NemA
ROV5_52	Acidobacteriota	CAD6013253.1	NemA
ROV5_52	Acidobacteriota	CAD6007270.1	NemA
ROV5_52	Acidobacteriota	CAE7035110.1	NemA
ROV5_52	Acidobacteriota	ACN14121.1	NemA
ROV5_52	Acidobacteriota	CAE7787391.1	NemA
ROV5_54	Proteobacteria	CAD6013253.1	NemA
ROV5_54	Proteobacteria	CAD6007270.1	NemA
ROV5_54	Proteobacteria	ACN14121.1	NemA
ROV5_54	Proteobacteria	CAE7035110.1	NemA
ROV5_54	Proteobacteria	CAD6013253.1	NemA
ROV5_54	Proteobacteria	CAD6007270.1	NemA
ROV5_54	Proteobacteria	CAE7035110.1	NemA
ROV5_54	Proteobacteria	ACN14121.1	NemA
ROV5_54	Proteobacteria	CAE7787391.1	NemA
ROV5_55	Proteobacteria	CAD6007270.1	NemA
ROV5_55	Proteobacteria	CAD6013253.1	NemA
ROV5_55	Proteobacteria	ACN14121.1	NemA
ROV5_55	Proteobacteria	CAE7035110.1	NemA
ROV5_55	Proteobacteria	CAE7787391.1	NemA
ROV5_59	Proteobacteria	CAD6013253.1	NemA
ROV5_59	Proteobacteria	CAD6007270.1	NemA
ROV5_59	Proteobacteria	CAE7035110.1	NemA
ROV5_59	Proteobacteria	ACN14121.1	NemA
ROV5_59	Proteobacteria	ACN14121.1	NemA
ROV5_59	Proteobacteria	CAE7035110.1	NemA
ROV5_59	Proteobacteria	CAD6007270.1	NemA
ROV5_59	Proteobacteria	CAD6013253.1	NemA
ROV5_59	Proteobacteria	CAD6013253.1	NemA
ROV5_59	Proteobacteria	CAD6007270.1	NemA
ROV5_59	Proteobacteria	CAE7035110.1	NemA
ROV5_59	Proteobacteria	ACN14121.1	NemA
ROV5_60	Acidobacteriota	CAD6013253.1	NemA
ROV5_60	Acidobacteriota	CAD6007270.1	NemA
ROV5_60	Acidobacteriota	ACN14121.1	NemA
ROV5_60	Acidobacteriota	CAE7035110.1	NemA
ROV5_63	Nitrospinota	CAE7035110.1	NemA
ROV5_63	Nitrospinota	ACN14121.1	NemA
ROV5_63	Nitrospinota	CAD6013253.1	NemA
ROV5_63	Nitrospinota	CAD6007270.1	NemA
ROV5_65	Proteobacteria	ADR59378.1	ChrR
ROV5_65	Proteobacteria	VWQ03500.1	ChrR
ROV5_65	Proteobacteria	ALI26123.1	ChrR
ROV5_65	Proteobacteria	ALI26123.1	ChrR
ROV5_65	Proteobacteria	CAE7035110.1	NemA
ROV5_65	Proteobacteria	ACN14121.1	NemA
ROV5_65	Proteobacteria	CAD6007270.1	NemA
ROV5_65	Proteobacteria	CAD6013253.1	NemA
ROV5_65	Proteobacteria	CAE7787391.1	NemA
ROV5_65	Proteobacteria	VWQ03500.1	ChrR
ROV5_65	Proteobacteria	ADR59378.1	ChrR
ROV5_66	Proteobacteria	VWQ03500.1	ChrR
ROV5_66	Proteobacteria	CAD6007270.1	NemA
ROV5_66	Proteobacteria	CAD6013253.1	NemA
ROV5_66	Proteobacteria	ACN14121.1	NemA
ROV5_66	Proteobacteria	CAE7035110.1	NemA
ROV5_66	Proteobacteria	CAD6007270.1	NemA
ROV5_66	Proteobacteria	CAD6013253.1	NemA
ROV5_66	Proteobacteria	ACN14121.1	NemA
ROV5_66	Proteobacteria	CAE7035110.1	NemA
ROV5_66	Proteobacteria	CAE7035110.1	NemA
ROV5_66	Proteobacteria	CAD6013253.1	NemA
ROV5_66	Proteobacteria	CAD6007270.1	NemA
ROV5_66	Proteobacteria	ACN14121.1	NemA
ROV5_66	Proteobacteria	VWQ03500.1	ChrR
ROV5_66	Proteobacteria	ADR59378.1	ChrR
ROV5_67	Desulfobacterota_D	ALI26123.1	ChrR
ROV5_69	Proteobacteria	CAE7035110.1	NemA
ROV5_69	Proteobacteria	CAD6007270.1	NemA
ROV5_69	Proteobacteria	CAD6013253.1	NemA
ROV5_69	Proteobacteria	ACN14121.1	NemA
ROV5_69	Proteobacteria	CAE7035110.1	NemA
ROV5_69	Proteobacteria	ACN14121.1	NemA
ROV5_69	Proteobacteria	CAD6013253.1	NemA
ROV5_69	Proteobacteria	CAD6007270.1	NemA
ROV5_69	Proteobacteria	CAE7787391.1	NemA
ROV5_69	Proteobacteria	ACN14121.1	NemA
ROV5_69	Proteobacteria	CAE7035110.1	NemA
ROV5_69	Proteobacteria	CAD6013253.1	NemA
ROV5_69	Proteobacteria	CAD6007270.1	NemA
ROV5_70	Proteobacteria	CAD6007270.1	NemA
ROV5_70	Proteobacteria	CAD6013253.1	NemA
ROV5_70	Proteobacteria	ACN14121.1	NemA
ROV5_70	Proteobacteria	CAE7035110.1	NemA
ROV5_72	Proteobacteria	CAE7035110.1	NemA
ROV5_72	Proteobacteria	ACN14121.1	NemA
ROV5_72	Proteobacteria	CAD6013253.1	NemA
ROV5_72	Proteobacteria	CAD6007270.1	NemA
ROV5_72	Proteobacteria	CAD6013253.1	NemA
ROV5_72	Proteobacteria	CAD6007270.1	NemA
ROV5_72	Proteobacteria	CAE7035110.1	NemA
ROV5_72	Proteobacteria	ACN14121.1	NemA
ROV5_73	Thermoproteota	ALI26123.1	ChrR
ROV5_73	Thermoproteota	ACN14121.1	NemA
ROV5_73	Thermoproteota	CAE7035110.1	NemA
ROV5_73	Thermoproteota	CAD6013253.1	NemA
ROV5_73	Thermoproteota	CAD6007270.1	NemA
ROV5_73	Thermoproteota	CAE7787391.1	NemA
ROV5_76	Proteobacteria	ALI26123.1	ChrR
ROV5_76	Proteobacteria	ALI26123.1	ChrR
ROV5_76	Proteobacteria	CAD6007270.1	NemA
ROV5_76	Proteobacteria	CAD6013253.1	NemA
ROV5_76	Proteobacteria	ACN14121.1	NemA
ROV5_76	Proteobacteria	CAE7035110.1	NemA
ROV5_76	Proteobacteria	CAD6013253.1	NemA
ROV5_76	Proteobacteria	CAD6007270.1	NemA
ROV5_76	Proteobacteria	ACN14121.1	NemA
ROV5_76	Proteobacteria	CAE7035110.1	NemA
ROV5_76	Proteobacteria	CAE7787391.1	NemA
ROV5_76	Proteobacteria	CAE7035110.1	NemA
ROV5_76	Proteobacteria	CAD6013253.1	NemA
ROV5_76	Proteobacteria	CAD6007270.1	NemA
ROV5_76	Proteobacteria	ACN14121.1	NemA
ROV5_77	Proteobacteria	CAD6007270.1	NemA
ROV5_77	Proteobacteria	CAD6013253.1	NemA
ROV5_77	Proteobacteria	ACN14121.1	NemA
ROV5_77	Proteobacteria	CAE7035110.1	NemA
ROV5_77	Proteobacteria	CAE7787391.1	NemA
ROV5_77	Proteobacteria	ALI26123.1	ChrR
ROV5_77	Proteobacteria	ALI26123.1	ChrR
ROV5_77	Proteobacteria	CAD6013253.1	NemA
ROV5_77	Proteobacteria	CAD6007270.1	NemA
ROV5_77	Proteobacteria	ACN14121.1	NemA
ROV5_77	Proteobacteria	CAE7035110.1	NemA
ROV5_81	Proteobacteria	CAD6013253.1	NemA
ROV5_81	Proteobacteria	CAD6007270.1	NemA
ROV5_81	Proteobacteria	ACN14121.1	NemA
ROV5_81	Proteobacteria	CAE7035110.1	NemA
ROV5_81	Proteobacteria	CAD6013253.1	NemA
ROV5_81	Proteobacteria	CAD6007270.1	NemA
ROV5_81	Proteobacteria	CAE7035110.1	NemA
ROV5_81	Proteobacteria	ACN14121.1	NemA
ROV5_82	Bacteroidota	ALI26123.1	ChrR
ROV5_82	Bacteroidota	VWQ03500.1	ChrR
ROV5_82	Bacteroidota	ADR59378.1	ChrR
ROV5_84	Planctomycetota	CAD6013253.1	NemA
ROV5_84	Planctomycetota	CAD6007270.1	NemA
ROV5_84	Planctomycetota	ACN14121.1	NemA
ROV5_84	Planctomycetota	CAE7035110.1	NemA
ROV5_84	Planctomycetota	CAE7787391.1	NemA
ROV5_85	KSB1	VWQ03500.1	ChrR
ROV5_85	KSB1	ADR59378.1	ChrR
ROV5_86	KSB1	ALI26123.1	ChrR
ROV5_87	Desulfobacterota_B	AEC46826.1	ChrR
ROV5_92	Thermoproteota	ADR59378.1	ChrR
ROV5_92	Thermoproteota	VWQ03500.1	ChrR
ROV5_94	Proteobacteria	ALI26123.1	ChrR
ROV5_94	Proteobacteria	ALI26123.1	ChrR
ROV5_99	Bacteroidota	CAD6007270.1	NemA
ROV5_99	Bacteroidota	CAD6013253.1	NemA
ROV5_99	Bacteroidota	CAE7035110.1	NemA
ROV5_99	Bacteroidota	ACN14121.1	NemA
ROV5_99	Bacteroidota	CAE7787391.1	NemA
ROV5_9	Proteobacteria	ADR59378.1	ChrR
ROV5_9	Proteobacteria	VWQ03500.1	ChrR
9CJW_11	Proteobacteria	CAE7874929.1	CueO
9CJW_11	Proteobacteria	QGJ79844.1	PcoA
9CJW_11	Proteobacteria	QGJ79844.1	PcoA
9CJW_11	Proteobacteria	QBQ69109.1	PcoA
9CJW_11	Proteobacteria	QBQ69109.1	PcoA
9CJW_11	Proteobacteria	QNI18376.1	PcoA
9CJW_11	Proteobacteria	QNI18376.1	PcoA
9CJW_11	Proteobacteria	ADD75925.1	CueO
9CJW_11	Proteobacteria	CAE7874929.1	CueO
9CJW_11	Proteobacteria	CCI75290.1	CueO
9CJW_11	Proteobacteria	CDO15958.1	CueO
9CJW_11	Proteobacteria	CDQ52200.1	CueO
9CJW_11	Proteobacteria	CAD6022113.1	CueO
9CJW_11	Proteobacteria	UXG45068.1	PcoA
9CJW_11	Proteobacteria	CAE7874929.1	CueO
9CJW_12	Proteobacteria	CAE7874929.1	CueO
9CJW_12	Proteobacteria	CAE7874929.1	CueO
9CJW_12	Proteobacteria	CAE7874929.1	CueO
9CJW_12	Proteobacteria	CAE7874929.1	CueO
9CJW_12	Proteobacteria	QGJ79844.1	PcoA
9CJW_12	Proteobacteria	QBQ69109.1	PcoA
9CJW_12	Proteobacteria	QNI18376.1	PcoA
9CJW_12	Proteobacteria	CCI75290.1	CueO
9CJW_12	Proteobacteria	CDQ52200.1	CueO
9CJW_12	Proteobacteria	CDO15958.1	CueO
9CJW_12	Proteobacteria	ADD75925.1	CueO
9CJW_12	Proteobacteria	CAD6022113.1	CueO
9CJW_12	Proteobacteria	CAE7874929.1	CueO
9CJW_12	Proteobacteria	QNI18376.1	PcoA
9CJW_12	Proteobacteria	QGJ79844.1	PcoA
9CJW_12	Proteobacteria	QBQ69109.1	PcoA
9CJW_12	Proteobacteria	CAE7874929.1	CueO
9CJW_12	Proteobacteria	CCI75290.1	CueO
9CJW_12	Proteobacteria	CDO15958.1	CueO
9CJW_12	Proteobacteria	ADD75925.1	CueO
9CJW_12	Proteobacteria	CDQ52200.1	CueO
9CJW_12	Proteobacteria	CAE7874929.1	CueO
9CJW_12	Proteobacteria	CAE7874929.1	CueO
9CJW_12	Proteobacteria	CAE7874929.1	CueO
9CJW_12	Proteobacteria	CAD6022113.1	CueO
9CJW_12	Proteobacteria	CDQ52200.1	CueO
9CJW_12	Proteobacteria	CCI75290.1	CueO
9CJW_12	Proteobacteria	CDO15958.1	CueO
9CJW_12	Proteobacteria	ADD75925.1	CueO
9CJW_12	Proteobacteria	CAE7874929.1	CueO
9CJW_12	Proteobacteria	CAE7874929.1	CueO
9CJW_13	Acidobacteriota	CAE7874929.1	CueO
9CJW_13	Acidobacteriota	CAE7874929.1	CueO
9CJW_13	Acidobacteriota	CAE7874929.1	CueO
9CJW_13	Acidobacteriota	CAE7874929.1	CueO
9CJW_13	Acidobacteriota	CAE7874929.1	CueO
9CJW_13	Acidobacteriota	CAE7874929.1	CueO
9CJW_13	Acidobacteriota	CAE7874929.1	CueO
9CJW_14	Proteobacteria	CAE7874929.1	CueO
9CJW_14	Proteobacteria	CAE7874929.1	CueO
9CJW_14	Proteobacteria	QGJ79844.1	PcoA
9CJW_14	Proteobacteria	QBQ69109.1	PcoA
9CJW_14	Proteobacteria	QNI18376.1	PcoA
9CJW_14	Proteobacteria	CAE7874929.1	CueO
9CJW_14	Proteobacteria	CDQ52200.1	CueO
9CJW_14	Proteobacteria	CCI75290.1	CueO
9CJW_14	Proteobacteria	CDO15958.1	CueO
9CJW_14	Proteobacteria	CAD6022113.1	CueO
9CJW_14	Proteobacteria	ADD75925.1	CueO
9CJW_14	Proteobacteria	UXG45068.1	PcoA
9CJW_14	Proteobacteria	CAE7874929.1	CueO
9CJW_14	Proteobacteria	CAE7874929.1	CueO
9CJW_17	Chloroflexota	CAE7874929.1	CueO
9CJW_17	Chloroflexota	CAE7874929.1	CueO
9CJW_20	Thermoproteota	CAE7874929.1	CueO
9CJW_21	Planctomycetota	CAE7874929.1	CueO
9CJW_22	Proteobacteria	CAE7874929.1	CueO
9CJW_22	Proteobacteria	CAE7874929.1	CueO
9CJW_22	Proteobacteria	CAE7874929.1	CueO
9CJW_22	Proteobacteria	CAE7874929.1	CueO
9CJW_22	Proteobacteria	CAE7874929.1	CueO
9CJW_22	Proteobacteria	CAE7874929.1	CueO
9CJW_22	Proteobacteria	CAE7874929.1	CueO
9CJW_22	Proteobacteria	CAE7874929.1	CueO
9CJW_22	Proteobacteria	CAE7874929.1	CueO
9CJW_22	Proteobacteria	CAE7874929.1	CueO
9CJW_22	Proteobacteria	CAE7874929.1	CueO
9CJW_23	Acidobacteriota	CAE7874929.1	CueO
9CJW_24	Nitrospinota	QNI18376.1	PcoA
9CJW_24	Nitrospinota	QGJ79844.1	PcoA
9CJW_24	Nitrospinota	QBQ69109.1	PcoA
9CJW_24	Nitrospinota	CDQ52200.1	CueO
9CJW_24	Nitrospinota	CDO15958.1	CueO
9CJW_24	Nitrospinota	CCI75290.1	CueO
9CJW_24	Nitrospinota	CAE7874929.1	CueO
9CJW_24	Nitrospinota	CAE7874929.1	CueO
9CJW_24	Nitrospinota	CAE7874929.1	CueO
9CJW_26	Desulfobacterota_D	CAE7874929.1	CueO
9CJW_26	Desulfobacterota_D	CAE7874929.1	CueO
9CJW_28	Proteobacteria	CAE7874929.1	CueO
9CJW_28	Proteobacteria	QNI18376.1	PcoA
9CJW_28	Proteobacteria	QNI18376.1	PcoA
9CJW_28	Proteobacteria	QGJ79844.1	PcoA
9CJW_28	Proteobacteria	QGJ79844.1	PcoA
9CJW_28	Proteobacteria	QBQ69109.1	PcoA
9CJW_28	Proteobacteria	QBQ69109.1	PcoA
9CJW_28	Proteobacteria	CAD6022113.1	CueO
9CJW_28	Proteobacteria	CDO15958.1	CueO
9CJW_28	Proteobacteria	CDQ52200.1	CueO
9CJW_28	Proteobacteria	CCI75290.1	CueO
9CJW_28	Proteobacteria	WGZ82248.1	PcoA
9CJW_28	Proteobacteria	WGZ76201.1	PcoA
9CJW_28	Proteobacteria	UXG45068.1	PcoA
9CJW_28	Proteobacteria	CAE7874929.1	CueO
9CJW_29	Proteobacteria	CAE7874929.1	CueO
9CJW_2	Proteobacteria	QGJ79844.1	PcoA
9CJW_2	Proteobacteria	QGJ79844.1	PcoA
9CJW_2	Proteobacteria	QBQ69109.1	PcoA
9CJW_2	Proteobacteria	QBQ69109.1	PcoA
9CJW_2	Proteobacteria	QNI18376.1	PcoA
9CJW_2	Proteobacteria	QNI18376.1	PcoA
9CJW_2	Proteobacteria	QGJ79844.1	PcoA
9CJW_2	Proteobacteria	QBQ69109.1	PcoA
9CJW_2	Proteobacteria	QNI18376.1	PcoA
9CJW_2	Proteobacteria	CAE7874929.1	CueO
9CJW_2	Proteobacteria	CAD6022113.1	CueO
9CJW_2	Proteobacteria	CDO15958.1	CueO
9CJW_2	Proteobacteria	CDQ52200.1	CueO
9CJW_2	Proteobacteria	CCI75290.1	CueO
9CJW_2	Proteobacteria	QGJ79844.1	PcoA
9CJW_2	Proteobacteria	QBQ69109.1	PcoA
9CJW_2	Proteobacteria	QNI18376.1	PcoA
9CJW_2	Proteobacteria	UXG45068.1	PcoA
9CJW_2	Proteobacteria	CAE7874929.1	CueO
9CJW_2	Proteobacteria	ADD75925.1	CueO
9CJW_2	Proteobacteria	CAD6022113.1	CueO
9CJW_2	Proteobacteria	CDQ52200.1	CueO
9CJW_2	Proteobacteria	CCI75290.1	CueO
9CJW_2	Proteobacteria	CDO15958.1	CueO
9CJW_30	Gemmatimonadota	CAE7874929.1	CueO
9CJW_30	Gemmatimonadota	CAE7874929.1	CueO
9CJW_30	Gemmatimonadota	QNI18376.1	PcoA
9CJW_30	Gemmatimonadota	QNI18376.1	PcoA
9CJW_30	Gemmatimonadota	QGJ79844.1	PcoA
9CJW_30	Gemmatimonadota	QGJ79844.1	PcoA
9CJW_30	Gemmatimonadota	QBQ69109.1	PcoA
9CJW_30	Gemmatimonadota	QBQ69109.1	PcoA
9CJW_30	Gemmatimonadota	ADD75925.1	CueO
9CJW_30	Gemmatimonadota	CAD6022113.1	CueO
9CJW_30	Gemmatimonadota	CAD6022113.1	CueO
9CJW_30	Gemmatimonadota	CDO15958.1	CueO
9CJW_30	Gemmatimonadota	CDO15958.1	CueO
9CJW_30	Gemmatimonadota	CCI75290.1	CueO
9CJW_30	Gemmatimonadota	CCI75290.1	CueO
9CJW_30	Gemmatimonadota	CDQ52200.1	CueO
9CJW_30	Gemmatimonadota	CDQ52200.1	CueO
9CJW_30	Gemmatimonadota	CAE7874929.1	CueO
9CJW_30	Gemmatimonadota	CAE7874929.1	CueO
9CJW_30	Gemmatimonadota	CDQ52200.1	CueO
9CJW_30	Gemmatimonadota	CDO15958.1	CueO
9CJW_30	Gemmatimonadota	CCI75290.1	CueO
9CJW_30	Gemmatimonadota	ADD75925.1	CueO
9CJW_30	Gemmatimonadota	CAD6022113.1	CueO
9CJW_30	Gemmatimonadota	QGJ79844.1	PcoA
9CJW_30	Gemmatimonadota	QBQ69109.1	PcoA
9CJW_30	Gemmatimonadota	QNI18376.1	PcoA
9CJW_30	Gemmatimonadota	CAE7599623.1	CueO
9CJW_30	Gemmatimonadota	CAE7874929.1	CueO
9CJW_30	Gemmatimonadota	CAD6022113.1	CueO
9CJW_30	Gemmatimonadota	QGJ79844.1	PcoA
9CJW_30	Gemmatimonadota	QGJ79844.1	PcoA
9CJW_30	Gemmatimonadota	QBQ69109.1	PcoA
9CJW_30	Gemmatimonadota	QBQ69109.1	PcoA
9CJW_30	Gemmatimonadota	QNI18376.1	PcoA
9CJW_30	Gemmatimonadota	QNI18376.1	PcoA
9CJW_30	Gemmatimonadota	ADD75925.1	CueO
9CJW_30	Gemmatimonadota	ADD75925.1	CueO
9CJW_30	Gemmatimonadota	CDO15958.1	CueO
9CJW_30	Gemmatimonadota	CDO15958.1	CueO
9CJW_30	Gemmatimonadota	CDQ52200.1	CueO
9CJW_30	Gemmatimonadota	CDQ52200.1	CueO
9CJW_30	Gemmatimonadota	CCI75290.1	CueO
9CJW_30	Gemmatimonadota	CCI75290.1	CueO
9CJW_30	Gemmatimonadota	CAE7599623.1	CueO
9CJW_30	Gemmatimonadota	QGJ79844.1	PcoA
9CJW_30	Gemmatimonadota	QGJ79844.1	PcoA
9CJW_30	Gemmatimonadota	QBQ69109.1	PcoA
9CJW_30	Gemmatimonadota	QBQ69109.1	PcoA
9CJW_30	Gemmatimonadota	QNI18376.1	PcoA
9CJW_30	Gemmatimonadota	QNI18376.1	PcoA
9CJW_33	KSB1	CAE7874929.1	CueO
9CJW_33	KSB1	CAE7874929.1	CueO
9CJW_33	KSB1	CAE7874929.1	CueO
9CJW_33	KSB1	CAD6022113.1	CueO
9CJW_33	KSB1	CCI75290.1	CueO
9CJW_33	KSB1	CCI75290.1	CueO
9CJW_33	KSB1	CDQ52200.1	CueO
9CJW_33	KSB1	CDQ52200.1	CueO
9CJW_33	KSB1	CDO15958.1	CueO
9CJW_33	KSB1	CDO15958.1	CueO
9CJW_33	KSB1	ADD75925.1	CueO
9CJW_33	KSB1	ADD75925.1	CueO
9CJW_33	KSB1	CAE7599623.1	CueO
9CJW_33	KSB1	CAE7874929.1	CueO
9CJW_33	KSB1	CAE7874929.1	CueO
9CJW_33	KSB1	CAE7874929.1	CueO
9CJW_33	KSB1	CAE7874929.1	CueO
9CJW_33	KSB1	CAE7874929.1	CueO
9CJW_33	KSB1	CAE7874929.1	CueO
9CJW_33	KSB1	CAE7874929.1	CueO
9CJW_34	Proteobacteria	QGJ79844.1	PcoA
9CJW_34	Proteobacteria	QBQ69109.1	PcoA
9CJW_34	Proteobacteria	QNI18376.1	PcoA
9CJW_34	Proteobacteria	UXG45068.1	PcoA
9CJW_34	Proteobacteria	WGZ82248.1	PcoA
9CJW_34	Proteobacteria	WGZ76201.1	PcoA
9CJW_34	Proteobacteria	CDQ52200.1	CueO
9CJW_34	Proteobacteria	CCI75290.1	CueO
9CJW_34	Proteobacteria	CDO15958.1	CueO
9CJW_34	Proteobacteria	ADD75925.1	CueO
9CJW_34	Proteobacteria	CAD6022113.1	CueO
9CJW_34	Proteobacteria	CAE7874929.1	CueO
9CJW_34	Proteobacteria	CAE7874929.1	CueO
9CJW_34	Proteobacteria	CAE7874929.1	CueO
9CJW_34	Proteobacteria	CAE7874929.1	CueO
9CJW_34	Proteobacteria	CAE7874929.1	CueO
9CJW_34	Proteobacteria	CAE7874929.1	CueO
9CJW_34	Proteobacteria	CAE7874929.1	CueO
9CJW_35	Chloroflexota	CAE7874929.1	CueO
9CJW_40	Thermoproteota	CAE7874929.1	CueO
9CJW_40	Thermoproteota	QGJ79844.1	PcoA
9CJW_40	Thermoproteota	QGJ79844.1	PcoA
9CJW_40	Thermoproteota	QBQ69109.1	PcoA
9CJW_40	Thermoproteota	QBQ69109.1	PcoA
9CJW_40	Thermoproteota	QNI18376.1	PcoA
9CJW_40	Thermoproteota	QNI18376.1	PcoA
9CJW_40	Thermoproteota	CAE7874929.1	CueO
9CJW_40	Thermoproteota	ADD75925.1	CueO
9CJW_40	Thermoproteota	CAD6022113.1	CueO
9CJW_40	Thermoproteota	CDQ52200.1	CueO
9CJW_40	Thermoproteota	CCI75290.1	CueO
9CJW_40	Thermoproteota	CDO15958.1	CueO
9CJW_42	Nitrospirota	CAE7874929.1	CueO
9CJW_43	Bacteroidota	CAE7874929.1	CueO
9CJW_43	Bacteroidota	CAE7874929.1	CueO
9CJW_43	Bacteroidota	CAE7874929.1	CueO
9CJW_43	Bacteroidota	CAE7874929.1	CueO
9CJW_44	Acidobacteriota	QGJ79844.1	PcoA
9CJW_44	Acidobacteriota	QGJ79844.1	PcoA
9CJW_44	Acidobacteriota	QBQ69109.1	PcoA
9CJW_44	Acidobacteriota	QBQ69109.1	PcoA
9CJW_44	Acidobacteriota	QNI18376.1	PcoA
9CJW_44	Acidobacteriota	QNI18376.1	PcoA
9CJW_44	Acidobacteriota	CDO15958.1	CueO
9CJW_44	Acidobacteriota	CDO15958.1	CueO
9CJW_44	Acidobacteriota	CDQ52200.1	CueO
9CJW_44	Acidobacteriota	CDQ52200.1	CueO
9CJW_44	Acidobacteriota	CCI75290.1	CueO
9CJW_44	Acidobacteriota	CCI75290.1	CueO
9CJW_44	Acidobacteriota	CAD6022113.1	CueO
9CJW_44	Acidobacteriota	CAD6022113.1	CueO
9CJW_44	Acidobacteriota	ADD75925.1	CueO
9CJW_44	Acidobacteriota	CAE7874929.1	CueO
9CJW_44	Acidobacteriota	CAE7874929.1	CueO
9CJW_44	Acidobacteriota	CAE7874929.1	CueO
9CJW_44	Acidobacteriota	CAE7874929.1	CueO
9CJW_44	Acidobacteriota	CAE7874929.1	CueO
9CJW_44	Acidobacteriota	CAE7874929.1	CueO
9CJW_44	Acidobacteriota	ADD75925.1	CueO
9CJW_44	Acidobacteriota	QNI18376.1	PcoA
9CJW_44	Acidobacteriota	QGJ79844.1	PcoA
9CJW_44	Acidobacteriota	QBQ69109.1	PcoA
9CJW_44	Acidobacteriota	CDQ52200.1	CueO
9CJW_44	Acidobacteriota	CDO15958.1	CueO
9CJW_44	Acidobacteriota	CCI75290.1	CueO
9CJW_44	Acidobacteriota	CAD6022113.1	CueO
9CJW_44	Acidobacteriota	CAE7874929.1	CueO
9CJW_44	Acidobacteriota	QGJ79844.1	PcoA
9CJW_44	Acidobacteriota	QBQ69109.1	PcoA
9CJW_44	Acidobacteriota	CAE7874929.1	CueO
9CJW_44	Acidobacteriota	CAE7874929.1	CueO
9CJW_44	Acidobacteriota	CAE7874929.1	CueO
9CJW_44	Acidobacteriota	ADD75925.1	CueO
9CJW_44	Acidobacteriota	CAD6022113.1	CueO
9CJW_44	Acidobacteriota	CAD6022113.1	CueO
9CJW_44	Acidobacteriota	CDO15958.1	CueO
9CJW_44	Acidobacteriota	CDO15958.1	CueO
9CJW_44	Acidobacteriota	CCI75290.1	CueO
9CJW_44	Acidobacteriota	CCI75290.1	CueO
9CJW_44	Acidobacteriota	CDQ52200.1	CueO
9CJW_44	Acidobacteriota	CDQ52200.1	CueO
9CJW_44	Acidobacteriota	QNI18376.1	PcoA
9CJW_44	Acidobacteriota	QNI18376.1	PcoA
9CJW_44	Acidobacteriota	QGJ79844.1	PcoA
9CJW_44	Acidobacteriota	QGJ79844.1	PcoA
9CJW_44	Acidobacteriota	QBQ69109.1	PcoA
9CJW_44	Acidobacteriota	QBQ69109.1	PcoA
9CJW_44	Acidobacteriota	CAE7599623.1	CueO
9CJW_44	Acidobacteriota	CAE7599623.1	CueO
9CJW_44	Acidobacteriota	CAD6022113.1	CueO
9CJW_44	Acidobacteriota	CAD6022113.1	CueO
9CJW_44	Acidobacteriota	CCI75290.1	CueO
9CJW_44	Acidobacteriota	CCI75290.1	CueO
9CJW_44	Acidobacteriota	CAE7874929.1	CueO
9CJW_44	Acidobacteriota	CDO15958.1	CueO
9CJW_44	Acidobacteriota	CDO15958.1	CueO
9CJW_44	Acidobacteriota	CDQ52200.1	CueO
9CJW_44	Acidobacteriota	CDQ52200.1	CueO
9CJW_44	Acidobacteriota	ADD75925.1	CueO
9CJW_44	Acidobacteriota	ADD75925.1	CueO
9CJW_45	Thermoproteota	CAE7874929.1	CueO
9CJW_45	Thermoproteota	QGJ79844.1	PcoA
9CJW_45	Thermoproteota	QGJ79844.1	PcoA
9CJW_45	Thermoproteota	QBQ69109.1	PcoA
9CJW_45	Thermoproteota	QBQ69109.1	PcoA
9CJW_45	Thermoproteota	QNI18376.1	PcoA
9CJW_45	Thermoproteota	QNI18376.1	PcoA
9CJW_45	Thermoproteota	CAE7874929.1	CueO
9CJW_45	Thermoproteota	CCI75290.1	CueO
9CJW_45	Thermoproteota	CDQ52200.1	CueO
9CJW_45	Thermoproteota	CDO15958.1	CueO
9CJW_45	Thermoproteota	ADD75925.1	CueO
9CJW_45	Thermoproteota	CAD6022113.1	CueO
9CJW_46	Proteobacteria	QGJ79844.1	PcoA
9CJW_46	Proteobacteria	QBQ69109.1	PcoA
9CJW_46	Proteobacteria	QNI18376.1	PcoA
9CJW_47	Proteobacteria	CAE7874929.1	CueO
9CJW_47	Proteobacteria	CAE7599623.1	CueO
9CJW_47	Proteobacteria	CAE7874929.1	CueO
9CJW_47	Proteobacteria	CAD6022113.1	CueO
9CJW_47	Proteobacteria	ADD75925.1	CueO
9CJW_47	Proteobacteria	CCI75290.1	CueO
9CJW_47	Proteobacteria	CCI75290.1	CueO
9CJW_47	Proteobacteria	CDO15958.1	CueO
9CJW_47	Proteobacteria	CDO15958.1	CueO
9CJW_47	Proteobacteria	CDQ52200.1	CueO
9CJW_47	Proteobacteria	CDQ52200.1	CueO
9CJW_47	Proteobacteria	QNI18376.1	PcoA
9CJW_47	Proteobacteria	QGJ79844.1	PcoA
9CJW_47	Proteobacteria	QBQ69109.1	PcoA
9CJW_47	Proteobacteria	CAE7874929.1	CueO
9CJW_47	Proteobacteria	CAE7874929.1	CueO
9CJW_47	Proteobacteria	CAD6022113.1	CueO
9CJW_47	Proteobacteria	CDO15958.1	CueO
9CJW_47	Proteobacteria	CDQ52200.1	CueO
9CJW_47	Proteobacteria	CCI75290.1	CueO
9CJW_47	Proteobacteria	QNI18376.1	PcoA
9CJW_47	Proteobacteria	QNI18376.1	PcoA
9CJW_47	Proteobacteria	QGJ79844.1	PcoA
9CJW_47	Proteobacteria	QGJ79844.1	PcoA
9CJW_47	Proteobacteria	QBQ69109.1	PcoA
9CJW_47	Proteobacteria	QBQ69109.1	PcoA
9CJW_47	Proteobacteria	ADD75925.1	CueO
9CJW_47	Proteobacteria	CAE7874929.1	CueO
9CJW_47	Proteobacteria	UXG45068.1	PcoA
9CJW_47	Proteobacteria	WGZ82248.1	PcoA
9CJW_47	Proteobacteria	WGZ76201.1	PcoA
9CJW_47	Proteobacteria	CAE7599623.1	CueO
9CJW_47	Proteobacteria	QGJ79844.1	PcoA
9CJW_47	Proteobacteria	QBQ69109.1	PcoA
9CJW_47	Proteobacteria	QNI18376.1	PcoA
9CJW_47	Proteobacteria	CAE7874929.1	CueO
9CJW_47	Proteobacteria	CAE7874929.1	CueO
9CJW_47	Proteobacteria	CAE7874929.1	CueO
9CJW_48	Proteobacteria	QGJ79844.1	PcoA
9CJW_48	Proteobacteria	QBQ69109.1	PcoA
9CJW_48	Proteobacteria	QNI18376.1	PcoA
9CJW_48	Proteobacteria	UXG45068.1	PcoA
9CJW_48	Proteobacteria	CAE7874929.1	CueO
9CJW_48	Proteobacteria	QNI18376.1	PcoA
9CJW_48	Proteobacteria	QGJ79844.1	PcoA
[truncated: 5,399 more rows]

## Sheet: S8
Table S8. Siderophore annotation information of MAGs from the deep-sea nodule area.
Group	MAGs ID	MAG's classificatioin at the phylum level	HMM	Protein name	Category
sediment	37A_bin.1	Proteobacteria	ExbB-family	ExbB	iron aquisition siderophore transport potential
sediment	37A_bin.1	Proteobacteria	ExbD-family	ExbD	iron aquisition siderophore transport potential
sediment	37A_bin.1	Proteobacteria	TonB-family	TonB	iron aquisition siderophore transport potential
sediment	37A_bin.1	Proteobacteria	ExbD-family	ExbD	iron aquisition siderophore transport potential
sediment	37A_bin.1	Proteobacteria	ExbB-family	ExbB	iron aquisition siderophore transport potential
sediment	37A_bin.1	Proteobacteria	ExbB-family	ExbB	iron aquisition siderophore transport potential
sediment	37A_bin.1	Proteobacteria	ExbB-family	ExbB	iron aquisition siderophore transport potential
sediment	37A_bin.1	Proteobacteria	ExbB-family	ExbB	iron aquisition siderophore transport potential
sediment	37A_bin.1	Proteobacteria	ExbD-family	ExbD	iron aquisition siderophore transport potential
sediment	37A_bin.1	Proteobacteria	ExbD-family	ExbD	iron aquisition siderophore transport potential
sediment	37A_bin.1	Proteobacteria	TonB-family	TonB	iron aquisition siderophore transport potential
sediment	37A_bin.1	Proteobacteria	TonB-family	TonB	iron aquisition siderophore transport potential
sediment	37A_bin.1	Proteobacteria	ExbD-family	ExbD	iron aquisition siderophore transport potential
sediment	37A_bin.1	Proteobacteria	ExbB-family	ExbB	iron aquisition siderophore transport potential
sediment	37A_bin.1	Proteobacteria	ExbD-family	ExbD	iron aquisition siderophore transport potential
sediment	37A_bin.1	Proteobacteria	ExbB-family	ExbB	iron aquisition siderophore transport potential
sediment	37A_bin.1	Proteobacteria	FbpB-FutB-family-iron-permease	FbpB	iron aquisition iron transport
sediment	37A_bin.2	Proteobacteria	TonB-family	TonB	iron aquisition siderophore transport potential
sediment	37A_bin.2	Proteobacteria	TonB-family	TonB	iron aquisition siderophore transport potential
sediment	37A_bin.2	Proteobacteria	ExbD-family	ExbD	iron aquisition siderophore transport potential
sediment	37A_bin.2	Proteobacteria	ExbB-family	ExbB	iron aquisition siderophore transport potential
sediment	37A_bin.2	Proteobacteria	ExbD-family	ExbD	iron aquisition siderophore transport potential
sediment	37A_bin.2	Proteobacteria	ExbD-family	ExbD	iron aquisition siderophore transport potential
sediment	37A_bin.2	Proteobacteria	ExbB-family	ExbB	iron aquisition siderophore transport potential
sediment	37A_bin.2	Proteobacteria	Sid_PvdS_regulator_Paeruginosa_PA2426_180620	PvdS	iron gene regulation
sediment	37A_bin.3	Proteobacteria	FbpB-family-iron-permease	FbpB	iron aquisition iron transport
sediment	37A_bin.3	Proteobacteria	FbpB-family-iron-permease	FbpB	iron aquisition iron transport
sediment	37A_bin.3	Proteobacteria	FbpB-family-iron-permease	FbpB	iron aquisition iron transport
sediment	37A_bin.3	Proteobacteria	FbpB-family-iron-permease	FbpB	iron aquisition iron transport
sediment	37A_bin.3	Proteobacteria	FbpB-family-iron-permease	FbpB	iron aquisition iron transport
sediment	37A_bin.3	Proteobacteria	FbpB-FutB-family-iron-permease	FbpB	iron aquisition iron transport
sediment	37A_bin.3	Proteobacteria	ExbB-family	ExbB	iron aquisition siderophore transport potential
sediment	37A_bin.3	Proteobacteria	ExbD-family	ExbD	iron aquisition siderophore transport potential
sediment	37A_bin.3	Proteobacteria	PF04773_FecR	FecR	iron gene regulation
sediment	37A_bin.3	Proteobacteria	PF04773_FecR	FecR	iron gene regulation
sediment	37A_bin.4	KSB1	TonB-family	TonB	iron aquisition siderophore transport potential
sediment	37A_bin.4	KSB1	ExbD-family	ExbD	iron aquisition siderophore transport potential
sediment	37A_bin.4	KSB1	ExbB-family	ExbB	iron aquisition siderophore transport potential
sediment	37A_bin.4	KSB1	ExbB-family	ExbB	iron aquisition siderophore transport potential
sediment	37A_bin.4	KSB1	ExbD-family	ExbD	iron aquisition siderophore transport potential
sediment	37A_bin.4	KSB1	Sid_PvdS_regulator_Paeruginosa_PA2426_180620	PvdS	iron gene regulation
sediment	37A_bin.4	KSB1	Sid_PvdS_regulator_Paeruginosa_PA2426_180620	PvdS	iron gene regulation
sediment	37A_bin.4	KSB1	Sid_PvdS_regulator_Paeruginosa_PA2426_180620	PvdS	iron gene regulation
sediment	37A_bin.5	Desulfobacterota_B	FbpB-family-iron-permease	FbpB	iron aquisition iron transport
sediment	37A_bin.5	Desulfobacterota_B	ExbD-family	ExbD	iron aquisition siderophore transport potential
sediment	37A_bin.5	Desulfobacterota_B	ExbB-family	ExbB	iron aquisition siderophore transport potential
sediment	37A_bin.5	Desulfobacterota_B	ExbD-family	ExbD	iron aquisition siderophore transport potential
sediment	37A_bin.5	Desulfobacterota_B	ExbB-family	ExbB	iron aquisition siderophore transport potential
sediment	37A_bin.5	Desulfobacterota_B	Sid_PvdS_regulator_Paeruginosa_PA2426_180620	PvdS	iron gene regulation
sediment	37A_bin.5	Desulfobacterota_B	PF04773_FecR	FecR	iron gene regulation
sediment	37A_bin.6	Proteobacteria	ExbD-family	ExbD	iron aquisition siderophore transport potential
sediment	37A_bin.6	Proteobacteria	ExbB-family	ExbB	iron aquisition siderophore transport potential
sediment	37A_bin.6	Proteobacteria	PF04773_FecR	FecR	iron gene regulation
sediment	37A_bin.7	Nitrospirota	ExbB-family	ExbB	iron aquisition siderophore transport potential
sediment	37A_bin.7	Nitrospirota	ExbD-family	ExbD	iron aquisition siderophore transport potential
sediment	37A_bin.7	Nitrospirota	TonB-family	TonB	iron aquisition siderophore transport potential
sediment	37A_bin.7	Nitrospirota	ExbD-family	ExbD	iron aquisition siderophore transport potential
sediment	37A_bin.7	Nitrospirota	Sid_PvdS_regulator_Paeruginosa_PA2426_180620	PvdS	iron gene regulation
sediment	37A_bin.7	Nitrospirota	Sid_PvdS_regulator_Paeruginosa_PA2426_180620	PvdS	iron gene regulation
sediment	37A_bin.7	Nitrospirota	Sid_PvdS_regulator_Paeruginosa_PA2426_180620	PvdS	iron gene regulation
sediment	38A_bin.1	Proteobacteria	ExbB-family	ExbB	iron aquisition siderophore transport potential
sediment	38A_bin.1	Proteobacteria	ExbD-family	ExbD	iron aquisition siderophore transport potential
sediment	38A_bin.1	Proteobacteria	ExbD-family	ExbD	iron aquisition siderophore transport potential
sediment	38A_bin.1	Proteobacteria	TonB-family	TonB	iron aquisition siderophore transport potential
sediment	38A_bin.1	Proteobacteria	TonB-family	TonB	iron aquisition siderophore transport potential
sediment	38A_bin.1	Proteobacteria	ExbD-family	ExbD	iron aquisition siderophore transport potential
sediment	38A_bin.1	Proteobacteria	ExbB-family	ExbB	iron aquisition siderophore transport potential
sediment	38A_bin.1	Proteobacteria	Sid_PvdS_regulator_Paeruginosa_PA2426_180620	PvdS	iron gene regulation
sediment	38A_bin.1	Proteobacteria	PF04773_FecR	FecR	iron gene regulation
sediment	38A_bin.1	Proteobacteria	FbpB-FutB-family-iron-permease	FbpB	iron aquisition iron transport
sediment	38A_bin.2	Proteobacteria	FbpB-FutB-family-iron-permease	FbpB	iron aquisition iron transport
sediment	38A_bin.2	Proteobacteria	ExbD-family	ExbD	iron aquisition siderophore transport potential
sediment	38A_bin.2	Proteobacteria	ExbB-family	ExbB	iron aquisition siderophore transport potential
sediment	38A_bin.2	Proteobacteria	PF04773_FecR	FecR	iron gene regulation
sediment	38A_bin.2	Proteobacteria	PF04773_FecR	FecR	iron gene regulation
sediment	38A_bin.3	Nitrospirota	FbpB-FutB-family-iron-permease	FbpB	iron aquisition iron transport
sediment	38A_bin.3	Nitrospirota	FbpB-FutB-family-iron-permease	FbpB	iron aquisition iron transport
sediment	38A_bin.3	Nitrospirota	ExbD-family	ExbD	iron aquisition siderophore transport potential
sediment	38A_bin.3	Nitrospirota	ExbB-family	ExbB	iron aquisition siderophore transport potential
sediment	38A_bin.3	Nitrospirota	TonB-family	TonB	iron aquisition siderophore transport potential
sediment	38A_bin.3	Nitrospirota	ExbD-family	ExbD	iron aquisition siderophore transport potential
sediment	38A_bin.4	Proteobacteria	ExbD-family	ExbD	iron aquisition siderophore transport potential
sediment	38A_bin.4	Proteobacteria	ExbB-family	ExbB	iron aquisition siderophore transport potential
sediment	38A_bin.4	Proteobacteria	FbpB-family-iron-permease	FbpB	iron aquisition iron transport
sediment	38A_bin.4	Proteobacteria	TonB-family	TonB	iron aquisition siderophore transport potential
sediment	38A_bin.4	Proteobacteria	ExbD-family	ExbD	iron aquisition siderophore transport potential
sediment	38A_bin.4	Proteobacteria	ExbB-family	ExbB	iron aquisition siderophore transport potential
sediment	38A_bin.4	Proteobacteria	PF04773_FecR	FecR	iron gene regulation
sediment	38A_bin.4	Proteobacteria	TonB-family	TonB	iron aquisition siderophore transport potential
sediment	38A_bin.4	Proteobacteria	Sid_PvdS_regulator_Paeruginosa_PA2426_180620	PvdS	iron gene regulation
sediment	38A_bin.4	Proteobacteria	PF04773_FecR	FecR	iron gene regulation
sediment	38A_bin.4	Proteobacteria	FbpB-FutB-family-iron-permease	FbpB	iron aquisition iron transport
sediment	38A_bin.5	Proteobacteria	FbpB-FutB-family-iron-permease	FbpB	iron aquisition iron transport
sediment	38A_bin.5	Proteobacteria	TonB-family	TonB	iron aquisition siderophore transport potential
sediment	38A_bin.5	Proteobacteria	ExbD-family	ExbD	iron aquisition siderophore transport potential
sediment	38A_bin.5	Proteobacteria	ExbD-family	ExbD	iron aquisition siderophore transport potential
sediment	38A_bin.5	Proteobacteria	ExbB-family	ExbB	iron aquisition siderophore transport potential
sediment	38A_bin.5	Proteobacteria	ExbB-family	ExbB	iron aquisition siderophore transport potential
sediment	38A_bin.5	Proteobacteria	ExbB-family	ExbB	iron aquisition siderophore transport potential
sediment	38A_bin.5	Proteobacteria	ExbD-family	ExbD	iron aquisition siderophore transport potential
sediment	38A_bin.5	Proteobacteria	TonB-family	TonB	iron aquisition siderophore transport potential
sediment	38A_bin.5	Proteobacteria	ExbD-family	ExbD	iron aquisition siderophore transport potential
sediment	38A_bin.5	Proteobacteria	TonB-family	TonB	iron aquisition siderophore transport potential
sediment	38A_bin.5	Proteobacteria	ExbB-family	ExbB	iron aquisition siderophore transport potential
sediment	38A_bin.5	Proteobacteria	ExbD-family	ExbD	iron aquisition siderophore transport potential
sediment	38A_bin.5	Proteobacteria	ExbD-family	ExbD	iron aquisition siderophore transport potential
sediment	38A_bin.5	Proteobacteria	Sid_PvdS_regulator_Paeruginosa_PA2426_180620	PvdS	iron gene regulation
sediment	38A_bin.5	Proteobacteria	PF04773_FecR	FecR	iron gene regulation
sediment	38A_bin.6	Gemmatimonadota	FbpB-FutB-family-iron-permease	FbpB	iron aquisition iron transport
sediment	38A_bin.6	Gemmatimonadota	Sid_PvdS_regulator_Paeruginosa_PA2426_180620	PvdS	iron gene regulation
sediment	39A_bin.1	Proteobacteria	FbpB-family-iron-permease	FbpB	iron aquisition iron transport
sediment	39A_bin.1	Proteobacteria	ExbD-family	ExbD	iron aquisition siderophore transport potential
sediment	39A_bin.1	Proteobacteria	ExbB-family	ExbB	iron aquisition siderophore transport potential
sediment	39A_bin.1	Proteobacteria	TonB-family	TonB	iron aquisition siderophore transport potential
sediment	39A_bin.1	Proteobacteria	ExbD-family	ExbD	iron aquisition siderophore transport potential
sediment	39A_bin.1	Proteobacteria	ExbB-family	ExbB	iron aquisition siderophore transport potential
sediment	39A_bin.1	Proteobacteria	PF04773_FecR	FecR	iron gene regulation
sediment	39A_bin.1	Proteobacteria	PF04773_FecR	FecR	iron gene regulation
sediment	39A_bin.2	Proteobacteria	FbpB-FutB-family-iron-permease	FbpB	iron aquisition iron transport
sediment	39A_bin.2	Proteobacteria	FbpB-family-iron-permease	FbpB	iron aquisition iron transport
sediment	39A_bin.2	Proteobacteria	FbpB-family-iron-permease	FbpB	iron aquisition iron transport
sediment	39A_bin.2	Proteobacteria	FbpB-family-iron-permease	FbpB	iron aquisition iron transport
sediment	39A_bin.2	Proteobacteria	FbpB-family-iron-permease	FbpB	iron aquisition iron transport
sediment	39A_bin.2	Proteobacteria	FbpB-FutB-family-iron-permease	FbpB	iron aquisition iron transport
sediment	39A_bin.2	Proteobacteria	ExbB-family	ExbB	iron aquisition siderophore transport potential
sediment	39A_bin.2	Proteobacteria	ExbD-family	ExbD	iron aquisition siderophore transport potential
sediment	39A_bin.2	Proteobacteria	PF04773_FecR	FecR	iron gene regulation
sediment	39A_bin.3	Gemmatimonadota	ExbB-family	ExbB	iron aquisition siderophore transport potential
sediment	39A_bin.3	Gemmatimonadota	ExbD-family	ExbD	iron aquisition siderophore transport potential
sediment	39A_bin.3	Gemmatimonadota	TonB-family	TonB	iron aquisition siderophore transport potential
sediment	39A_bin.3	Gemmatimonadota	ExbD-family	ExbD	iron aquisition siderophore transport potential
sediment	39A_bin.3	Gemmatimonadota	ExbB-family	ExbB	iron aquisition siderophore transport potential
sediment	39A_bin.3	Gemmatimonadota	Sid_PvdS_regulator_Paeruginosa_PA2426_180620	PvdS	iron gene regulation
sediment	39A_bin.3	Gemmatimonadota	Sid_PvdS_regulator_Paeruginosa_PA2426_180620	PvdS	iron gene regulation
sediment	39A_bin.3	Gemmatimonadota	Sid_PvdS_regulator_Paeruginosa_PA2426_180620	PvdS	iron gene regulation
sediment	39A_bin.3	Gemmatimonadota	Sid_PvdS_regulator_Paeruginosa_PA2426_180620	PvdS	iron gene regulation
sediment	39A_bin.3	Gemmatimonadota	FbpB-FutB-family-iron-permease	FbpB	iron aquisition iron transport
sediment	39A_bin.3	Gemmatimonadota	FbpB-FutB-family-iron-permease	FbpB	iron aquisition iron transport
sediment	39A_bin.4	Desulfobacterota_B	FbpB-family-iron-permease	FbpB	iron aquisition iron transport
sediment	39A_bin.4	Desulfobacterota_B	ExbD-family	ExbD	iron aquisition siderophore transport potential
sediment	39A_bin.4	Desulfobacterota_B	ExbB-family	ExbB	iron aquisition siderophore transport potential
sediment	39A_bin.4	Desulfobacterota_B	TonB-family	TonB	iron aquisition siderophore transport potential
sediment	39A_bin.4	Desulfobacterota_B	ExbD-family	ExbD	iron aquisition siderophore transport potential
sediment	39A_bin.4	Desulfobacterota_B	ExbB-family	ExbB	iron aquisition siderophore transport potential
sediment	39A_bin.4	Desulfobacterota_B	ExbB-family	ExbB	iron aquisition siderophore transport potential
sediment	39A_bin.4	Desulfobacterota_B	ExbD-family	ExbD	iron aquisition siderophore transport potential
sediment	39A_bin.4	Desulfobacterota_B	Sid_PvdS_regulator_Paeruginosa_PA2426_180620	PvdS	iron gene regulation
sediment	39A_bin.4	Desulfobacterota_B	FbpB-FutB-family-iron-permease	FbpB	iron aquisition iron transport
sediment	39A_bin.5	Proteobacteria	ExbB-family	ExbB	iron aquisition siderophore transport potential
sediment	39A_bin.5	Proteobacteria	ExbD-family	ExbD	iron aquisition siderophore transport potential
sediment	39A_bin.5	Proteobacteria	ExbD-family	ExbD	iron aquisition siderophore transport potential
sediment	39A_bin.5	Proteobacteria	TonB-family	TonB	iron aquisition siderophore transport potential
sediment	39A_bin.5	Proteobacteria	ExbD-family	ExbD	iron aquisition siderophore transport potential
sediment	39A_bin.5	Proteobacteria	ExbB-family	ExbB	iron aquisition siderophore transport potential
sediment	39A_bin.5	Proteobacteria	Sid_PvdS_regulator_Paeruginosa_PA2426_180620	PvdS	iron gene regulation
sediment	39A_bin.5	Proteobacteria	PF04773_FecR	FecR	iron gene regulation
sediment	39A_bin.5	Proteobacteria	FbpB-FutB-family-iron-permease	FbpB	iron aquisition iron transport
sediment	39A_bin.6	Nitrospirota	FbpB-FutB-family-iron-permease	FbpB	iron aquisition iron transport
sediment	39A_bin.6	Nitrospirota	ExbB-family	ExbB	iron aquisition siderophore transport potential
sediment	39A_bin.6	Nitrospirota	ExbD-family	ExbD	iron aquisition siderophore transport potential
sediment	39A_bin.6	Nitrospirota	FbpB-FutB-family-iron-permease	FbpB	iron aquisition iron transport
sediment	39A_bin.6	Nitrospirota	Sid_PvdS_regulator_Paeruginosa_PA2426_180620	PvdS	iron gene regulation
sediment	39A_bin.7	Proteobacteria	ExbB-family	ExbB	iron aquisition siderophore transport potential
sediment	39A_bin.7	Proteobacteria	ExbD-family	ExbD	iron aquisition siderophore transport potential
sediment	39A_bin.7	Proteobacteria	ExbB-family	ExbB	iron aquisition siderophore transport potential
sediment	39A_bin.7	Proteobacteria	ExbD-family	ExbD	iron aquisition siderophore transport potential
sediment	39A_bin.7	Proteobacteria	ExbD-family	ExbD	iron aquisition siderophore transport potential
sediment	39A_bin.7	Proteobacteria	FbpB-FutB-family-iron-permease	FbpB	iron aquisition iron transport
sediment	39A_bin.7	Proteobacteria	ExbB-family	ExbB	iron aquisition siderophore transport potential
sediment	39A_bin.7	Proteobacteria	ExbB-family	ExbB	iron aquisition siderophore transport potential
sediment	39A_bin.7	Proteobacteria	ExbD-family	ExbD	iron aquisition siderophore transport potential
sediment	39A_bin.7	Proteobacteria	TonB-family	TonB	iron aquisition siderophore transport potential
sediment	39A_bin.7	Proteobacteria	ExbB-family	ExbB	iron aquisition siderophore transport potential
sediment	39A_bin.7	Proteobacteria	ExbB-family	ExbB	iron aquisition siderophore transport potential
sediment	39A_bin.7	Proteobacteria	ExbD-family	ExbD	iron aquisition siderophore transport potential
sediment	39A_bin.7	Proteobacteria	ExbD-family	ExbD	iron aquisition siderophore transport potential
sediment	39A_bin.7	Proteobacteria	ExbB-family	ExbB	iron aquisition siderophore transport potential
sediment	39A_bin.7	Proteobacteria	ExbD-family	ExbD	iron aquisition siderophore transport potential
sediment	39A_bin.7	Proteobacteria	TonB-family	TonB	iron aquisition siderophore transport potential
sediment	39A_bin.7	Proteobacteria	Sid_PvdS_regulator_Paeruginosa_PA2426_180620	PvdS	iron gene regulation
sediment	39A_bin.7	Proteobacteria	PF04773_FecR	FecR	iron gene regulation
sediment	39A_bin.7	Proteobacteria	PF04773_FecR	FecR	iron gene regulation
sediment	39A_bin.8	Proteobacteria	ExbD-family	ExbD	iron aquisition siderophore transport potential
sediment	39A_bin.8	Proteobacteria	ExbB-family	ExbB	iron aquisition siderophore transport potential
sediment	39A_bin.8	Proteobacteria	ExbB-family	ExbB	iron aquisition siderophore transport potential
sediment	39A_bin.8	Proteobacteria	ExbD-family	ExbD	iron aquisition siderophore transport potential
sediment	39A_bin.8	Proteobacteria	TonB-family	TonB	iron aquisition siderophore transport potential
sediment	39A_bin.8	Proteobacteria	ExbD-family	ExbD	iron aquisition siderophore transport potential
sediment	39A_bin.8	Proteobacteria	ExbB-family	ExbB	iron aquisition siderophore transport potential
sediment	39A_bin.8	Proteobacteria	Sid_PvdS_regulator_Paeruginosa_PA2426_180620	PvdS	iron gene regulation
sediment	39A_bin.8	Proteobacteria	PF04773_FecR	FecR	iron gene regulation
sediment	40A_bin.1	Proteobacteria	TonB-family	TonB	iron aquisition siderophore transport potential
sediment	40A_bin.1	Proteobacteria	ExbD-family	ExbD	iron aquisition siderophore transport potential
sediment	40A_bin.1	Proteobacteria	ExbB-family	ExbB	iron aquisition siderophore transport potential
sediment	40A_bin.1	Proteobacteria	FbpB-FutB-family-iron-permease	FbpB	iron aquisition iron transport
sediment	40A_bin.2	Nitrospinota	ExbB-family	ExbB	iron aquisition siderophore transport potential
sediment	40A_bin.2	Nitrospinota	ExbD-family	ExbD	iron aquisition siderophore transport potential
sediment	40A_bin.2	Nitrospinota	TonB-family	TonB	iron aquisition siderophore transport potential
sediment	40A_bin.2	Nitrospinota	Sid_PvdS_regulator_Paeruginosa_PA2426_180620	PvdS	iron gene regulation
sediment	40A_bin.2	Nitrospinota	PF04773_FecR	FecR	iron gene regulation
sediment	40A_bin.3	Proteobacteria	ExbD-family	ExbD	iron aquisition siderophore transport potential
sediment	40A_bin.3	Proteobacteria	ExbB-family	ExbB	iron aquisition siderophore transport potential
sediment	40A_bin.3	Proteobacteria	ExbB-family	ExbB	iron aquisition siderophore transport potential
sediment	40A_bin.3	Proteobacteria	ExbB-family	ExbB	iron aquisition siderophore transport potential
sediment	40A_bin.3	Proteobacteria	ExbD-family	ExbD	iron aquisition siderophore transport potential
sediment	40A_bin.3	Proteobacteria	TonB-family	TonB	iron aquisition siderophore transport potential
sediment	40A_bin.3	Proteobacteria	ExbB-family	ExbB	iron aquisition siderophore transport potential
sediment	40A_bin.3	Proteobacteria	ExbB-family	ExbB	iron aquisition siderophore transport potential
sediment	40A_bin.3	Proteobacteria	ExbD-family	ExbD	iron aquisition siderophore transport potential
sediment	40A_bin.3	Proteobacteria	ExbD-family	ExbD	iron aquisition siderophore transport potential
sediment	40A_bin.3	Proteobacteria	TonB-family	TonB	iron aquisition siderophore transport potential
sediment	40A_bin.3	Proteobacteria	ExbB-family	ExbB	iron aquisition siderophore transport potential
sediment	40A_bin.3	Proteobacteria	ExbD-family	ExbD	iron aquisition siderophore transport potential
sediment	40A_bin.3	Proteobacteria	PF04773_FecR	FecR	iron gene regulation
sediment	40A_bin.4	Gemmatimonadota	FbpB-FutB-family-iron-permease	FbpB	iron aquisition iron transport
sediment	40A_bin.4	Gemmatimonadota	TonB-family	TonB	iron aquisition siderophore transport potential
sediment	40A_bin.4	Gemmatimonadota	ExbD-family	ExbD	iron aquisition siderophore transport potential
sediment	40A_bin.4	Gemmatimonadota	ExbB-family	ExbB	iron aquisition siderophore transport potential
sediment	40A_bin.4	Gemmatimonadota	Sid_PvdS_regulator_Paeruginosa_PA2426_180620	PvdS	iron gene regulation
sediment	40A_bin.4	Gemmatimonadota	Sid_PvdS_regulator_Paeruginosa_PA2426_180620	PvdS	iron gene regulation
sediment	40A_bin.4	Gemmatimonadota	Sid_PvdS_regulator_Paeruginosa_PA2426_180620	PvdS	iron gene regulation
sediment	40A_bin.4	Gemmatimonadota	Sid_PvdS_regulator_Paeruginosa_PA2426_180620	PvdS	iron gene regulation
sediment	40A_bin.5	Proteobacteria	ExbD-family	ExbD	iron aquisition siderophore transport potential
sediment	40A_bin.5	Proteobacteria	ExbB-family	ExbB	iron aquisition siderophore transport potential
sediment	40A_bin.5	Proteobacteria	FbpB-family-iron-permease	FbpB	iron aquisition iron transport
sediment	40A_bin.5	Proteobacteria	TonB-family	TonB	iron aquisition siderophore transport potential
sediment	40A_bin.5	Proteobacteria	ExbD-family	ExbD	iron aquisition siderophore transport potential
sediment	40A_bin.5	Proteobacteria	ExbD-family	ExbD	iron aquisition siderophore transport potential
sediment	40A_bin.5	Proteobacteria	ExbB-family	ExbB	iron aquisition siderophore transport potential
sediment	40A_bin.5	Proteobacteria	TonB-family	TonB	iron aquisition siderophore transport potential
sediment	40A_bin.5	Proteobacteria	ExbD-family	ExbD	iron aquisition siderophore transport potential
sediment	40A_bin.5	Proteobacteria	ExbB-family	ExbB	iron aquisition siderophore transport potential
sediment	40A_bin.5	Proteobacteria	Sid_PvdS_regulator_Paeruginosa_PA2426_180620	PvdS	iron gene regulation
sediment	40A_bin.5	Proteobacteria	PF04773_FecR	FecR	iron gene regulation
sediment	40A_bin.5	Proteobacteria	PF04773_FecR	FecR	iron gene regulation
sediment	40A_bin.5	Proteobacteria	FbpB-FutB-family-iron-permease	FbpB	iron aquisition iron transport
sediment	40A_bin.6	Proteobacteria	FbpB-family-iron-permease	FbpB	iron aquisition iron transport
sediment	40A_bin.6	Proteobacteria	FbpB-family-iron-permease	FbpB	iron aquisition iron transport
sediment	40A_bin.6	Proteobacteria	FbpB-family-iron-permease	FbpB	iron aquisition iron transport
sediment	40A_bin.6	Proteobacteria	FbpB-family-iron-permease	FbpB	iron aquisition iron transport
sediment	40A_bin.6	Proteobacteria	FbpB-FutB-family-iron-permease	FbpB	iron aquisition iron transport
sediment	40A_bin.6	Proteobacteria	ExbB-family	ExbB	iron aquisition siderophore transport potential
sediment	40A_bin.6	Proteobacteria	ExbD-family	ExbD	iron aquisition siderophore transport potential
sediment	40A_bin.7	Proteobacteria	ExbB-family	ExbB	iron aquisition siderophore transport potential
sediment	40A_bin.7	Proteobacteria	ExbD-family	ExbD	iron aquisition siderophore transport potential
sediment	40A_bin.7	Proteobacteria	ExbD-family	ExbD	iron aquisition siderophore transport potential
sediment	40A_bin.7	Proteobacteria	ExbB-family	ExbB	iron aquisition siderophore transport potential
sediment	40A_bin.7	Proteobacteria	ExbB-family	ExbB	iron aquisition siderophore transport potential
sediment	40A_bin.7	Proteobacteria	ExbB-family	ExbB	iron aquisition siderophore transport potential
sediment	40A_bin.7	Proteobacteria	ExbD-family	ExbD	iron aquisition siderophore transport potential
sediment	40A_bin.7	Proteobacteria	ExbB-family	ExbB	iron aquisition siderophore transport potential
sediment	40A_bin.7	Proteobacteria	ExbD-family	ExbD	iron aquisition siderophore transport potential
sediment	40A_bin.7	Proteobacteria	TonB-family	TonB	iron aquisition siderophore transport potential
sediment	40A_bin.7	Proteobacteria	Sid_PvdS_regulator_Paeruginosa_PA2426_180620	PvdS	iron gene regulation
sediment	41A_bin.1	Proteobacteria	ExbB-family	ExbB	iron aquisition siderophore transport potential
sediment	41A_bin.1	Proteobacteria	ExbD-family	ExbD	iron aquisition siderophore transport potential
sediment	41A_bin.1	Proteobacteria	PF04773_FecR	FecR	iron gene regulation
sediment	41A_bin.1	Proteobacteria	TonB-family	TonB	iron aquisition siderophore transport potential
sediment	41A_bin.1	Proteobacteria	ExbD-family	ExbD	iron aquisition siderophore transport potential
sediment	41A_bin.1	Proteobacteria	ExbB-family	ExbB	iron aquisition siderophore transport potential
sediment	41A_bin.1	Proteobacteria	ExbB-family	ExbB	iron aquisition siderophore transport potential
sediment	41A_bin.1	Proteobacteria	ExbD-family	ExbD	iron aquisition siderophore transport potential
sediment	41A_bin.1	Proteobacteria	ExbD-family	ExbD	iron aquisition siderophore transport potential
sediment	41A_bin.1	Proteobacteria	ExbB-family	ExbB	iron aquisition siderophore transport potential
sediment	41A_bin.2	Desulfobacterota_B	ExbB-family	ExbB	iron aquisition siderophore transport potential
sediment	41A_bin.2	Desulfobacterota_B	ExbD-family	ExbD	iron aquisition siderophore transport potential
sediment	41A_bin.2	Desulfobacterota_B	ExbB-family	ExbB	iron aquisition siderophore transport potential
sediment	41A_bin.2	Desulfobacterota_B	ExbD-family	ExbD	iron aquisition siderophore transport potential
sediment	41A_bin.2	Desulfobacterota_B	TonB-family	TonB	iron aquisition siderophore transport potential
sediment	41A_bin.2	Desulfobacterota_B	ExbB-family	ExbB	iron aquisition siderophore transport potential
sediment	41A_bin.2	Desulfobacterota_B	ExbD-family	ExbD	iron aquisition siderophore transport potential
sediment	41A_bin.2	Desulfobacterota_B	FbpB-FutB-family-iron-permease	FbpB	iron aquisition iron transport
sediment	41A_bin.2	Desulfobacterota_B	Sid_PvdS_regulator_Paeruginosa_PA2426_180620	PvdS	iron gene regulation
sediment	41A_bin.2	Desulfobacterota_B	Sid_PvdS_regulator_Paeruginosa_PA2426_180620	PvdS	iron gene regulation
sediment	41A_bin.2	Desulfobacterota_B	PF04773_FecR	FecR	iron gene regulation
sediment	41A_bin.3	Proteobacteria	FbpB-FutB-family-iron-permease	FbpB	iron aquisition iron transport
sediment	41A_bin.3	Proteobacteria	TonB-family	TonB	iron aquisition siderophore transport potential
sediment	41A_bin.3	Proteobacteria	ExbD-family	ExbD	iron aquisition siderophore transport potential
sediment	41A_bin.3	Proteobacteria	ExbB-family	ExbB	iron aquisition siderophore transport potential
sediment	41A_bin.3	Proteobacteria	ExbB-family	ExbB	iron aquisition siderophore transport potential
sediment	41A_bin.3	Proteobacteria	ExbD-family	ExbD	iron aquisition siderophore transport potential
sediment	41A_bin.3	Proteobacteria	ExbD-family	ExbD	iron aquisition siderophore transport potential
sediment	41A_bin.3	Proteobacteria	TonB-family	TonB	iron aquisition siderophore transport potential
sediment	41A_bin.3	Proteobacteria	ExbD-family	ExbD	iron aquisition siderophore transport potential
sediment	41A_bin.3	Proteobacteria	ExbB-family	ExbB	iron aquisition siderophore transport potential
sediment	41A_bin.3	Proteobacteria	ExbB-family	ExbB	iron aquisition siderophore transport potential
sediment	41A_bin.3	Proteobacteria	ExbD-family	ExbD	iron aquisition siderophore transport potential
sediment	41A_bin.3	Proteobacteria	ExbD-family	ExbD	iron aquisition siderophore transport potential
sediment	41A_bin.3	Proteobacteria	PF04773_FecR	FecR	iron gene regulation
sediment	41A_bin.4	Nitrospirota	FbpB-FutB-family-iron-permease	FbpB	iron aquisition iron transport
sediment	41A_bin.5	Proteobacteria	FbpB-FutB-family-iron-permease	FbpB	iron aquisition iron transport
sediment	41A_bin.5	Proteobacteria	ExbB-family	ExbB	iron aquisition siderophore transport potential
sediment	41A_bin.5	Proteobacteria	ExbD-family	ExbD	iron aquisition siderophore transport potential
sediment	41A_bin.5	Proteobacteria	PF04773_FecR	FecR	iron gene regulation
sediment	41A_bin.5	Proteobacteria	PF04773_FecR	FecR	iron gene regulation
sediment	41A_bin.6	Proteobacteria	FbpB-family-iron-permease	FbpB	iron aquisition iron transport
sediment	41A_bin.6	Proteobacteria	ExbB-family	ExbB	iron aquisition siderophore transport potential
sediment	41A_bin.6	Proteobacteria	ExbD-family	ExbD	iron aquisition siderophore transport potential
sediment	41A_bin.6	Proteobacteria	PF04773_FecR	FecR	iron gene regulation
sediment	41A_bin.6	Proteobacteria	PF04773_FecR	FecR	iron gene regulation
sediment	41A_bin.7	KSB1	ExbD-family	ExbD	iron aquisition siderophore transport potential
sediment	41A_bin.7	KSB1	ExbB-family	ExbB	iron aquisition siderophore transport potential
sediment	41A_bin.7	KSB1	TonB-family	TonB	iron aquisition siderophore transport potential
sediment	41A_bin.7	KSB1	ExbD-family	ExbD	iron aquisition siderophore transport potential
sediment	41A_bin.7	KSB1	ExbB-family	ExbB	iron aquisition siderophore transport potential
sediment	41A_bin.7	KSB1	ExbD-family	ExbD	iron aquisition siderophore transport potential
sediment	41A_bin.7	KSB1	ExbD-family	ExbD	iron aquisition siderophore transport potential
sediment	41A_bin.7	KSB1	ExbB-family	ExbB	iron aquisition siderophore transport potential
sediment	41A_bin.7	KSB1	ExbB-family	ExbB	iron aquisition siderophore transport potential
sediment	41A_bin.7	KSB1	ExbD-family	ExbD	iron aquisition siderophore transport potential
sediment	41A_bin.7	KSB1	Sid_PvdS_regulator_Paeruginosa_PA2426_180620	PvdS	iron gene regulation
sediment	41A_bin.7	KSB1	Sid_PvdS_regulator_Paeruginosa_PA2426_180620	PvdS	iron gene regulation
sediment	41A_bin.7	KSB1	Sid_PvdS_regulator_Paeruginosa_PA2426_180620	PvdS	iron gene regulation
sediment	41A_bin.7	KSB1	Sid_PvdS_regulator_Paeruginosa_PA2426_180620	PvdS	iron gene regulation
sediment	41A_bin.7	KSB1	PF04773_FecR	FecR	iron gene regulation
sediment	41A_bin.7	KSB1	PF04773_FecR	FecR	iron gene regulation
sediment	41A_bin.8	Proteobacteria	ExbB-family	ExbB	iron aquisition siderophore transport potential
sediment	41A_bin.8	Proteobacteria	ExbD-family	ExbD	iron aquisition siderophore transport potential
sediment	41A_bin.8	Proteobacteria	ExbD-family	ExbD	iron aquisition siderophore transport potential
sediment	41A_bin.8	Proteobacteria	TonB-family	TonB	iron aquisition siderophore transport potential
sediment	41A_bin.8	Proteobacteria	TonB-family	TonB	iron aquisition siderophore transport potential
sediment	41A_bin.8	Proteobacteria	ExbD-family	ExbD	iron aquisition siderophore transport potential
sediment	41A_bin.8	Proteobacteria	ExbB-family	ExbB	iron aquisition siderophore transport potential
sediment	41A_bin.8	Proteobacteria	FbpB-FutB-family-iron-permease	FbpB	iron aquisition iron transport
sediment	41A_bin.9	Proteobacteria	FbpB-FutB-family-iron-permease	FbpB	iron aquisition iron transport
sediment	41A_bin.9	Proteobacteria	FbpB-family-iron-permease	FbpB	iron aquisition iron transport
sediment	41A_bin.9	Proteobacteria	FbpB-family-iron-permease	FbpB	iron aquisition iron transport
sediment	41A_bin.9	Proteobacteria	FbpB-family-iron-permease	FbpB	iron aquisition iron transport
sediment	41A_bin.9	Proteobacteria	ExbB-family	ExbB	iron aquisition siderophore transport potential
sediment	41A_bin.9	Proteobacteria	ExbD-family	ExbD	iron aquisition siderophore transport potential
sediment	41A_bin.9	Proteobacteria	PF04773_FecR	FecR	iron gene regulation
sediment	41A_bin.9	Proteobacteria	FbpB-family-iron-permease	FbpB	iron aquisition iron transport
sediment	42A_bin.1	Nitrospinota	ExbB-family	ExbB	iron aquisition siderophore transport potential
sediment	42A_bin.1	Nitrospinota	ExbD-family	ExbD	iron aquisition siderophore transport potential
sediment	42A_bin.1	Nitrospinota	ExbD-family	ExbD	iron aquisition siderophore transport potential
sediment	42A_bin.1	Nitrospinota	TonB-family	TonB	iron aquisition siderophore transport potential
sediment	42A_bin.1	Nitrospinota	Sid_PvdS_regulator_Paeruginosa_PA2426_180620	PvdS	iron gene regulation
sediment	42A_bin.1	Nitrospinota	PF04773_FecR	FecR	iron gene regulation
sediment	42A_bin.2	Desulfobacterota_B	FbpB-family-iron-permease	FbpB	iron aquisition iron transport
sediment	42A_bin.2	Desulfobacterota_B	ExbB-family	ExbB	iron aquisition siderophore transport potential
sediment	42A_bin.2	Desulfobacterota_B	ExbD-family	ExbD	iron aquisition siderophore transport potential
sediment	42A_bin.2	Desulfobacterota_B	TonB-family	TonB	iron aquisition siderophore transport potential
sediment	42A_bin.2	Desulfobacterota_B	ExbB-family	ExbB	iron aquisition siderophore transport potential
sediment	42A_bin.2	Desulfobacterota_B	ExbD-family	ExbD	iron aquisition siderophore transport potential
sediment	42A_bin.2	Desulfobacterota_B	TonB-family	TonB	iron aquisition siderophore transport potential
sediment	42A_bin.2	Desulfobacterota_B	ExbB-family	ExbB	iron aquisition siderophore transport potential
sediment	42A_bin.2	Desulfobacterota_B	ExbD-family	ExbD	iron aquisition siderophore transport potential
sediment	42A_bin.2	Desulfobacterota_B	FbpB-FutB-family-iron-permease	FbpB	iron aquisition iron transport
sediment	42A_bin.2	Desulfobacterota_B	Sid_PvdS_regulator_Paeruginosa_PA2426_180620	PvdS	iron gene regulation
sediment	42A_bin.2	Desulfobacterota_B	Sid_PvdS_regulator_Paeruginosa_PA2426_180620	PvdS	iron gene regulation
sediment	42A_bin.2	Desulfobacterota_B	Sid_PvdS_regulator_Paeruginosa_PA2426_180620	PvdS	iron gene regulation
sediment	42A_bin.2	Desulfobacterota_B	Sid_PvdS_regulator_Paeruginosa_PA2426_180620	PvdS	iron gene regulation
sediment	42A_bin.2	Desulfobacterota_B	PF04773_FecR	FecR	iron gene regulation
sediment	42A_bin.3	Proteobacteria	ExbD-family	ExbD	iron aquisition siderophore transport potential
sediment	42A_bin.3	Proteobacteria	ExbB-family	ExbB	iron aquisition siderophore transport potential
sediment	42A_bin.3	Proteobacteria	PF04773_FecR	FecR	iron gene regulation
sediment	42A_bin.3	Proteobacteria	TonB-family	TonB	iron aquisition siderophore transport potential
sediment	42A_bin.3	Proteobacteria	PF04773_FecR	FecR	iron gene regulation
sediment	42A_bin.3	Proteobacteria	ExbB-family	ExbB	iron aquisition siderophore transport potential
sediment	42A_bin.3	Proteobacteria	ExbD-family	ExbD	iron aquisition siderophore transport potential
sediment	42A_bin.3	Proteobacteria	TonB-family	TonB	iron aquisition siderophore transport potential
sediment	42A_bin.3	Proteobacteria	ExbD-family	ExbD	iron aquisition siderophore transport potential
sediment	42A_bin.3	Proteobacteria	ExbD-family	ExbD	iron aquisition siderophore transport potential
sediment	42A_bin.3	Proteobacteria	ExbB-family	ExbB	iron aquisition siderophore transport potential
sediment	42A_bin.3	Proteobacteria	Sid_PvdS_regulator_Paeruginosa_PA2426_180620	PvdS	iron gene regulation
sediment	42A_bin.3	Proteobacteria	PF04773_FecR	FecR	iron gene regulation
sediment	42A_bin.3	Proteobacteria	FbpB-FutB-family-iron-permease	FbpB	iron aquisition iron transport
sediment	42A_bin.4	Nitrospirota	TonB-family	TonB	iron aquisition siderophore transport potential
sediment	42A_bin.4	Nitrospirota	ExbD-family	ExbD	iron aquisition siderophore transport potential
sediment	42A_bin.4	Nitrospirota	ExbB-family	ExbB	iron aquisition siderophore transport potential
sediment	42A_bin.4	Nitrospirota	Sid_PvdS_regulator_Paeruginosa_PA2426_180620	PvdS	iron gene regulation
sediment	42A_bin.4	Nitrospirota	Sid_PvdS_regulator_Paeruginosa_PA2426_180620	PvdS	iron gene regulation
sediment	42A_bin.5	Proteobacteria	FbpB-family-iron-permease	FbpB	iron aquisition iron transport
sediment	42A_bin.5	Proteobacteria	FbpB-family-iron-permease	FbpB	iron aquisition iron transport
sediment	42A_bin.5	Proteobacteria	ExbB-family	ExbB	iron aquisition siderophore transport potential
sediment	42A_bin.5	Proteobacteria	ExbD-family	ExbD	iron aquisition siderophore transport potential
sediment	42A_bin.5	Proteobacteria	PF04773_FecR	FecR	iron gene regulation
sediment	42A_bin.6	Proteobacteria	ExbD-family	ExbD	iron aquisition siderophore transport potential
sediment	42A_bin.6	Proteobacteria	ExbB-family	ExbB	iron aquisition siderophore transport potential
sediment	42A_bin.6	Proteobacteria	PF04773_FecR	FecR	iron gene regulation
sediment	42A_bin.6	Proteobacteria	PF04773_FecR	FecR	iron gene regulation
sediment	42A_bin.6	Proteobacteria	FbpB-FutB-family-iron-permease	FbpB	iron aquisition iron transport
sediment	42A_bin.7	Proteobacteria	FbpB-FutB-family-iron-permease	FbpB	iron aquisition iron transport
sediment	42A_bin.7	Proteobacteria	FbpB-family-iron-permease	FbpB	iron aquisition iron transport
sediment	42A_bin.7	Proteobacteria	FbpB-family-iron-permease	FbpB	iron aquisition iron transport
sediment	42A_bin.7	Proteobacteria	ExbB-family	ExbB	iron aquisition siderophore transport potential
sediment	42A_bin.7	Proteobacteria	ExbD-family	ExbD	iron aquisition siderophore transport potential
sediment	42A_bin.8	Methylomirabilota	TonB-family	TonB	iron aquisition siderophore transport potential
sediment	42A_bin.8	Methylomirabilota	TonB-family	TonB	iron aquisition siderophore transport potential
sediment	42A_bin.8	Methylomirabilota	ExbD-family	ExbD	iron aquisition siderophore transport potential
sediment	42A_bin.8	Methylomirabilota	ExbB-family	ExbB	iron aquisition siderophore transport potential
sediment	42A_bin.8	Methylomirabilota	FbpB-FutB-family-iron-permease	FbpB	iron aquisition iron transport
sediment	42A_bin.8	Methylomirabilota	Sid_PvdS_regulator_Paeruginosa_PA2426_180620	PvdS	iron gene regulation
sediment	42A_bin.8	Methylomirabilota	Sid_PvdS_regulator_Paeruginosa_PA2426_180620	PvdS	iron gene regulation
sediment	42A_bin.9	Proteobacteria	ExbB-family	ExbB	iron aquisition siderophore transport potential
sediment	42A_bin.9	Proteobacteria	ExbD-family	ExbD	iron aquisition siderophore transport potential
sediment	42A_bin.9	Proteobacteria	TonB-family	TonB	iron aquisition siderophore transport potential
sediment	42A_bin.9	Proteobacteria	ExbD-family	ExbD	iron aquisition siderophore transport potential
sediment	42A_bin.9	Proteobacteria	ExbB-family	ExbB	iron aquisition siderophore transport potential
sediment	42A_bin.9	Proteobacteria	ExbD-family	ExbD	iron aquisition siderophore transport potential
sediment	42A_bin.9	Proteobacteria	ExbD-family	ExbD	iron aquisition siderophore transport potential
sediment	42A_bin.9	Proteobacteria	ExbB-family	ExbB	iron aquisition siderophore transport potential
sediment	42A_bin.9	Proteobacteria	Sid_PvdS_regulator_Paeruginosa_PA2426_180620	PvdS	iron gene regulation
sediment	42A_bin.9	Proteobacteria	PF04773_FecR	FecR	iron gene regulation
sediment	42A_bin.9	Proteobacteria	FbpB-FutB-family-iron-permease	FbpB	iron aquisition iron transport
sediment	43A_bin.1	Proteobacteria	ExbB-family	ExbB	iron aquisition siderophore transport potential
sediment	43A_bin.1	Proteobacteria	ExbD-family	ExbD	iron aquisition siderophore transport potential
sediment	43A_bin.1	Proteobacteria	FbpB-family-iron-permease	FbpB	iron aquisition iron transport
sediment	43A_bin.1	Proteobacteria	PF04773_FecR	FecR	iron gene regulation
sediment	43A_bin.1	Proteobacteria	PF04773_FecR	FecR	iron gene regulation
sediment	43A_bin.1	Proteobacteria	ExbD-family	ExbD	iron aquisition siderophore transport potential
sediment	43A_bin.1	Proteobacteria	ExbB-family	ExbB	iron aquisition siderophore transport potential
sediment	43A_bin.1	Proteobacteria	ExbD-family	ExbD	iron aquisition siderophore transport potential
sediment	43A_bin.1	Proteobacteria	ExbB-family	ExbB	iron aquisition siderophore transport potential
sediment	43A_bin.1	Proteobacteria	Sid_PvdS_regulator_Paeruginosa_PA2426_180620	PvdS	iron gene regulation
sediment	43A_bin.1	Proteobacteria	PF04773_FecR	FecR	iron gene regulation
sediment	43A_bin.1	Proteobacteria	FbpB-FutB-family-iron-permease	FbpB	iron aquisition iron transport
sediment	43A_bin.10	Proteobacteria	FbpB-family-iron-permease	FbpB	iron aquisition iron transport
sediment	43A_bin.10	Proteobacteria	FbpB-family-iron-permease	FbpB	iron aquisition iron transport
sediment	43A_bin.10	Proteobacteria	FbpB-family-iron-permease	FbpB	iron aquisition iron transport
sediment	43A_bin.10	Proteobacteria	FbpB-family-iron-permease	FbpB	iron aquisition iron transport
sediment	43A_bin.10	Proteobacteria	FbpB-FutB-family-iron-permease	FbpB	iron aquisition iron transport
sediment	43A_bin.10	Proteobacteria	ExbB-family	ExbB	iron aquisition siderophore transport potential
sediment	43A_bin.10	Proteobacteria	ExbD-family	ExbD	iron aquisition siderophore transport potential
sediment	43A_bin.10	Proteobacteria	ExbB-family	ExbB	iron aquisition siderophore transport potential
sediment	43A_bin.10	Proteobacteria	ExbD-family	ExbD	iron aquisition siderophore transport potential
sediment	43A_bin.11	Proteobacteria	ExbB-family	ExbB	iron aquisition siderophore transport potential
sediment	43A_bin.11	Proteobacteria	ExbD-family	ExbD	iron aquisition siderophore transport potential
sediment	43A_bin.11	Proteobacteria	FbpB-FutB-family-iron-permease	FbpB	iron aquisition iron transport
sediment	43A_bin.11	Proteobacteria	ExbB-family	ExbB	iron aquisition siderophore transport potential
sediment	43A_bin.11	Proteobacteria	ExbB-family	ExbB	iron aquisition siderophore transport potential
sediment	43A_bin.11	Proteobacteria	ExbD-family	ExbD	iron aquisition siderophore transport potential
sediment	43A_bin.11	Proteobacteria	TonB-family	TonB	iron aquisition siderophore transport potential
sediment	43A_bin.11	Proteobacteria	TonB-family	TonB	iron aquisition siderophore transport potential
sediment	43A_bin.11	Proteobacteria	ExbD-family	ExbD	iron aquisition siderophore transport potential
sediment	43A_bin.11	Proteobacteria	ExbD-family	ExbD	iron aquisition siderophore transport potential
sediment	43A_bin.11	Proteobacteria	ExbB-family	ExbB	iron aquisition siderophore transport potential
sediment	43A_bin.11	Proteobacteria	ExbB-family	ExbB	iron aquisition siderophore transport potential
sediment	43A_bin.11	Proteobacteria	ExbB-family	ExbB	iron aquisition siderophore transport potential
sediment	43A_bin.11	Proteobacteria	ExbD-family	ExbD	iron aquisition siderophore transport potential
sediment	43A_bin.11	Proteobacteria	TonB-family	TonB	iron aquisition siderophore transport potential
sediment	43A_bin.11	Proteobacteria	ExbB-family	ExbB	iron aquisition siderophore transport potential
sediment	43A_bin.11	Proteobacteria	ExbD-family	ExbD	iron aquisition siderophore transport potential
sediment	43A_bin.11	Proteobacteria	Sid_PvdS_regulator_Paeruginosa_PA2426_180620	PvdS	iron gene regulation
sediment	43A_bin.11	Proteobacteria	PF04773_FecR	FecR	iron gene regulation
sediment	43A_bin.2	Nitrospirota	FbpB-FutB-family-iron-permease	FbpB	iron aquisition iron transport
sediment	43A_bin.2	Nitrospirota	ExbD-family	ExbD	iron aquisition siderophore transport potential
sediment	43A_bin.2	Nitrospirota	ExbB-family	ExbB	iron aquisition siderophore transport potential
sediment	43A_bin.2	Nitrospirota	ExbD-family	ExbD	iron aquisition siderophore transport potential
sediment	43A_bin.2	Nitrospirota	TonB-family	TonB	iron aquisition siderophore transport potential
sediment	43A_bin.2	Nitrospirota	Sid_PvdS_regulator_Paeruginosa_PA2426_180620	PvdS	iron gene regulation
sediment	43A_bin.3	Proteobacteria	FbpB-FutB-family-iron-permease	FbpB	iron aquisition iron transport
sediment	43A_bin.3	Proteobacteria	PF04773_FecR	FecR	iron gene regulation
sediment	43A_bin.3	Proteobacteria	PF04773_FecR	FecR	iron gene regulation
sediment	43A_bin.4	Proteobacteria	ExbD-family	ExbD	iron aquisition siderophore transport potential
sediment	43A_bin.4	Proteobacteria	ExbB-family	ExbB	iron aquisition siderophore transport potential
sediment	43A_bin.4	Proteobacteria	ExbD-family	ExbD	iron aquisition siderophore transport potential
sediment	43A_bin.4	Proteobacteria	ExbB-family	ExbB	iron aquisition siderophore transport potential
sediment	43A_bin.4	Proteobacteria	ExbB-family	ExbB	iron aquisition siderophore transport potential
sediment	43A_bin.4	Proteobacteria	ExbD-family	ExbD	iron aquisition siderophore transport potential
sediment	43A_bin.4	Proteobacteria	Sid_PvdS_regulator_Paeruginosa_PA2426_180620	PvdS	iron gene regulation
sediment	43A_bin.4	Proteobacteria	PF04773_FecR	FecR	iron gene regulation
sediment	43A_bin.5	Proteobacteria	ExbB-family	ExbB	iron aquisition siderophore transport potential
sediment	43A_bin.5	Proteobacteria	ExbD-family	ExbD	iron aquisition siderophore transport potential
sediment	43A_bin.5	Proteobacteria	TonB-family	TonB	iron aquisition siderophore transport potential
sediment	43A_bin.5	Proteobacteria	ExbD-family	ExbD	iron aquisition siderophore transport potential
sediment	43A_bin.5	Proteobacteria	ExbB-family	ExbB	iron aquisition siderophore transport potential
sediment	43A_bin.6	Proteobacteria	ExbB-family	ExbB	iron aquisition siderophore transport potential
sediment	43A_bin.6	Proteobacteria	ExbD-family	ExbD	iron aquisition siderophore transport potential
sediment	43A_bin.6	Proteobacteria	ExbB-family	ExbB	iron aquisition siderophore transport potential
sediment	43A_bin.6	Proteobacteria	ExbD-family	ExbD	iron aquisition siderophore transport potential
sediment	43A_bin.6	Proteobacteria	ExbD-family	ExbD	iron aquisition siderophore transport potential
sediment	43A_bin.6	Proteobacteria	TonB-family	TonB	iron aquisition siderophore transport potential
sediment	43A_bin.6	Proteobacteria	ExbB-family	ExbB	iron aquisition siderophore transport potential
sediment	43A_bin.6	Proteobacteria	ExbD-family	ExbD	iron aquisition siderophore transport potential
sediment	43A_bin.6	Proteobacteria	TonB-family	TonB	iron aquisition siderophore transport potential
sediment	43A_bin.6	Proteobacteria	PF04773_FecR	FecR	iron gene regulation
sediment	43A_bin.6	Proteobacteria	FbpB-FutB-family-iron-permease	FbpB	iron aquisition iron transport
sediment	43A_bin.8	Actinobacteriota	Sid_PvdS_regulator_Paeruginosa_PA2426_180620	PvdS	iron gene regulation
sediment	43A_bin.8	Actinobacteriota	Sid_PvdS_regulator_Paeruginosa_PA2426_180620	PvdS	iron gene regulation
sediment	43A_bin.9	KSB1	TonB-family	TonB	iron aquisition siderophore transport potential
sediment	43A_bin.9	KSB1	ExbD-family	ExbD	iron aquisition siderophore transport potential
sediment	43A_bin.9	KSB1	ExbD-family	ExbD	iron aquisition siderophore transport potential
sediment	43A_bin.9	KSB1	ExbB-family	ExbB	iron aquisition siderophore transport potential
sediment	43A_bin.9	KSB1	ExbB-family	ExbB	iron aquisition siderophore transport potential
sediment	43A_bin.9	KSB1	ExbD-family	ExbD	iron aquisition siderophore transport potential
sediment	43A_bin.9	KSB1	ExbD-family	ExbD	iron aquisition siderophore transport potential
sediment	43A_bin.9	KSB1	ExbD-family	ExbD	iron aquisition siderophore transport potential
sediment	43A_bin.9	KSB1	TonB-family	TonB	iron aquisition siderophore transport potential
sediment	43A_bin.9	KSB1	Sid_PvdS_regulator_Paeruginosa_PA2426_180620	PvdS	iron gene regulation
sediment	43A_bin.9	KSB1	ExbD-family	ExbD	iron aquisition siderophore transport potential
sediment	43A_bin.9	KSB1	TonB-family	TonB	iron aquisition siderophore transport potential
sediment	43A_bin.9	KSB1	Sid_PvdS_regulator_Paeruginosa_PA2426_180620	PvdS	iron gene regulation
sediment	43A_bin.9	KSB1	Sid_PvdS_regulator_Paeruginosa_PA2426_180620	PvdS	iron gene regulation
sediment	43A_bin.9	KSB1	Sid_PvdS_regulator_Paeruginosa_PA2426_180620	PvdS	iron gene regulation
sediment	43A_bin.9	KSB1	PF04773_FecR	FecR	iron gene regulation
sediment	43A_bin.9	KSB1	PF04773_FecR	FecR	iron gene regulation
sediment	44A_bin.1	Proteobacteria	ExbD-family	ExbD	iron aquisition siderophore transport potential
sediment	44A_bin.1	Proteobacteria	ExbD-family	ExbD	iron aquisition siderophore transport potential
sediment	44A_bin.1	Proteobacteria	ExbB-family	ExbB	iron aquisition siderophore transport potential
sediment	44A_bin.1	Proteobacteria	TonB-family	TonB	iron aquisition siderophore transport potential
sediment	44A_bin.1	Proteobacteria	TonB-family	TonB	iron aquisition siderophore transport potential
sediment	44A_bin.1	Proteobacteria	ExbD-family	ExbD	iron aquisition siderophore transport potential
sediment	44A_bin.1	Proteobacteria	ExbB-family	ExbB	iron aquisition siderophore transport potential
sediment	44A_bin.1	Proteobacteria	Sid_PvdS_regulator_Paeruginosa_PA2426_180620	PvdS	iron gene regulation
sediment	44A_bin.1	Proteobacteria	PF04773_FecR	FecR	iron gene regulation
sediment	44A_bin.1	Proteobacteria	FbpB-FutB-family-iron-permease	FbpB	iron aquisition iron transport
sediment	44A_bin.10	Proteobacteria	FbpB-family-iron-permease	FbpB	iron aquisition iron transport
sediment	44A_bin.10	Proteobacteria	FbpB-family-iron-permease	FbpB	iron aquisition iron transport
sediment	44A_bin.10	Proteobacteria	FbpB-family-iron-permease	FbpB	iron aquisition iron transport
sediment	44A_bin.10	Proteobacteria	FbpB-family-iron-permease	FbpB	iron aquisition iron transport
sediment	44A_bin.10	Proteobacteria	ExbB-family	ExbB	iron aquisition siderophore transport potential
sediment	44A_bin.10	Proteobacteria	ExbD-family	ExbD	iron aquisition siderophore transport potential
sediment	44A_bin.10	Proteobacteria	FbpB-family-iron-permease	FbpB	iron aquisition iron transport
sediment	44A_bin.11	Proteobacteria	ExbD-family	ExbD	iron aquisition siderophore transport potential
sediment	44A_bin.11	Proteobacteria	ExbB-family	ExbB	iron aquisition siderophore transport potential
sediment	44A_bin.11	Proteobacteria	TonB-family	TonB	iron aquisition siderophore transport potential
sediment	44A_bin.11	Proteobacteria	ExbD-family	ExbD	iron aquisition siderophore transport potential
sediment	44A_bin.11	Proteobacteria	ExbB-family	ExbB	iron aquisition siderophore transport potential
sediment	44A_bin.11	Proteobacteria	PF04773_FecR	FecR	iron gene regulation
sediment	44A_bin.11	Proteobacteria	PF04773_FecR	FecR	iron gene regulation
sediment	44A_bin.11	Proteobacteria	TonB-family	TonB	iron aquisition siderophore transport potential
sediment	44A_bin.11	Proteobacteria	ExbB-family	ExbB	iron aquisition siderophore transport potential
sediment	44A_bin.11	Proteobacteria	ExbD-family	ExbD	iron aquisition siderophore transport potential
sediment	44A_bin.11	Proteobacteria	ExbD-family	ExbD	iron aquisition siderophore transport potential
sediment	44A_bin.11	Proteobacteria	Sid_PvdS_regulator_Paeruginosa_PA2426_180620	PvdS	iron gene regulation
sediment	44A_bin.11	Proteobacteria	PF04773_FecR	FecR	iron gene regulation
sediment	44A_bin.11	Proteobacteria	FbpB-FutB-family-iron-permease	FbpB	iron aquisition iron transport
sediment	44A_bin.13	Proteobacteria	FbpB-FutB-family-iron-permease	FbpB	iron aquisition iron transport
sediment	44A_bin.13	Proteobacteria	ExbB-family	ExbB	iron aquisition siderophore transport potential
sediment	44A_bin.13	Proteobacteria	ExbD-family	ExbD	iron aquisition siderophore transport potential
sediment	44A_bin.13	Proteobacteria	PF04773_FecR	FecR	iron gene regulation
sediment	44A_bin.2	Proteobacteria	ExbB-family	ExbB	iron aquisition siderophore transport potential
sediment	44A_bin.2	Proteobacteria	ExbD-family	ExbD	iron aquisition siderophore transport potential
sediment	44A_bin.2	Proteobacteria	FbpB-FutB-family-iron-permease	FbpB	iron aquisition iron transport
sediment	44A_bin.2	Proteobacteria	ExbB-family	ExbB	iron aquisition siderophore transport potential
sediment	44A_bin.2	Proteobacteria	ExbB-family	ExbB	iron aquisition siderophore transport potential
sediment	44A_bin.2	Proteobacteria	ExbD-family	ExbD	iron aquisition siderophore transport potential
sediment	44A_bin.2	Proteobacteria	TonB-family	TonB	iron aquisition siderophore transport potential
sediment	44A_bin.2	Proteobacteria	TonB-family	TonB	iron aquisition siderophore transport potential
sediment	44A_bin.2	Proteobacteria	ExbD-family	ExbD	iron aquisition siderophore transport potential
sediment	44A_bin.2	Proteobacteria	ExbD-family	ExbD	iron aquisition siderophore transport potential
sediment	44A_bin.2	Proteobacteria	ExbB-family	ExbB	iron aquisition siderophore transport potential
sediment	44A_bin.2	Proteobacteria	ExbB-family	ExbB	iron aquisition siderophore transport potential
sediment	44A_bin.2	Proteobacteria	ExbB-family	ExbB	iron aquisition siderophore transport potential
sediment	44A_bin.2	Proteobacteria	ExbD-family	ExbD	iron aquisition siderophore transport potential
sediment	44A_bin.2	Proteobacteria	TonB-family	TonB	iron aquisition siderophore transport potential
sediment	44A_bin.2	Proteobacteria	ExbB-family	ExbB	iron aquisition siderophore transport potential
sediment	44A_bin.2	Proteobacteria	ExbD-family	ExbD	iron aquisition siderophore transport potential
sediment	44A_bin.2	Proteobacteria	Sid_PvdS_regulator_Paeruginosa_PA2426_180620	PvdS	iron gene regulation
sediment	44A_bin.3	Methylomirabilota	FbpB-FutB-family-iron-permease	FbpB	iron aquisition iron transport
sediment	44A_bin.3	Methylomirabilota	TonB-family	TonB	iron aquisition siderophore transport potential
sediment	44A_bin.3	Methylomirabilota	TonB-family	TonB	iron aquisition siderophore transport potential
sediment	44A_bin.3	Methylomirabilota	ExbD-family	ExbD	iron aquisition siderophore transport potential
sediment	44A_bin.3	Methylomirabilota	ExbB-family	ExbB	iron aquisition siderophore transport potential
sediment	44A_bin.3	Methylomirabilota	Sid_PvdS_regulator_Paeruginosa_PA2426_180620	PvdS	iron gene regulation
sediment	44A_bin.4	Proteobacteria	PF04773_FecR	FecR	iron gene regulation
sediment	44A_bin.4	Proteobacteria	ExbD-family	ExbD	iron aquisition siderophore transport potential
sediment	44A_bin.4	Proteobacteria	ExbB-family	ExbB	iron aquisition siderophore transport potential
sediment	44A_bin.4	Proteobacteria	PF04773_FecR	FecR	iron gene regulation
sediment	44A_bin.5	Desulfobacterota_B	FbpB-family-iron-permease	FbpB	iron aquisition iron transport
sediment	44A_bin.5	Desulfobacterota_B	FbpB-FutB-family-iron-permease	FbpB	iron aquisition iron transport
sediment	44A_bin.5	Desulfobacterota_B	TonB-family	TonB	iron aquisition siderophore transport potential
sediment	44A_bin.5	Desulfobacterota_B	ExbB-family	ExbB	iron aquisition siderophore transport potential
sediment	44A_bin.5	Desulfobacterota_B	ExbD-family	ExbD	iron aquisition siderophore transport potential
sediment	44A_bin.5	Desulfobacterota_B	ExbB-family	ExbB	iron aquisition siderophore transport potential
sediment	44A_bin.5	Desulfobacterota_B	ExbD-family	ExbD	iron aquisition siderophore transport potential
sediment	44A_bin.5	Desulfobacterota_B	TonB-family	TonB	iron aquisition siderophore transport potential
sediment	44A_bin.5	Desulfobacterota_B	ExbD-family	ExbD	iron aquisition siderophore transport potential
sediment	44A_bin.5	Desulfobacterota_B	ExbB-family	ExbB	iron aquisition siderophore transport potential
sediment	44A_bin.5	Desulfobacterota_B	FbpB-FutB-family-iron-permease	FbpB	iron aquisition iron transport
sediment	44A_bin.5	Desulfobacterota_B	Sid_PvdS_regulator_Paeruginosa_PA2426_180620	PvdS	iron gene regulation
sediment	44A_bin.5	Desulfobacterota_B	Sid_PvdS_regulator_Paeruginosa_PA2426_180620	PvdS	iron gene regulation
sediment	44A_bin.5	Desulfobacterota_B	Sid_PvdS_regulator_Paeruginosa_PA2426_180620	PvdS	iron gene regulation
sediment	44A_bin.5	Desulfobacterota_B	PF04773_FecR	FecR	iron gene regulation
sediment	44A_bin.5	Desulfobacterota_B	PF04773_FecR	FecR	iron gene regulation
sediment	44A_bin.6	Nitrospinota	ExbB-family	ExbB	iron aquisition siderophore transport potential
sediment	44A_bin.6	Nitrospinota	ExbD-family	ExbD	iron aquisition siderophore transport potential
sediment	44A_bin.6	Nitrospinota	Sid_PvdS_regulator_Paeruginosa_PA2426_180620	PvdS	iron gene regulation
sediment	44A_bin.6	Nitrospinota	PF04773_FecR	FecR	iron gene regulation
sediment	44A_bin.7	KSB1	ExbD-family	ExbD	iron aquisition siderophore transport potential
sediment	44A_bin.7	KSB1	ExbB-family	ExbB	iron aquisition siderophore transport potential
sediment	44A_bin.7	KSB1	ExbD-family	ExbD	iron aquisition siderophore transport potential
sediment	44A_bin.7	KSB1	ExbB-family	ExbB	iron aquisition siderophore transport potential
sediment	44A_bin.7	KSB1	ExbD-family	ExbD	iron aquisition siderophore transport potential
sediment	44A_bin.7	KSB1	ExbD-family	ExbD	iron aquisition siderophore transport potential
sediment	44A_bin.7	KSB1	TonB-family	TonB	iron aquisition siderophore transport potential
sediment	44A_bin.7	KSB1	Sid_PvdS_regulator_Paeruginosa_PA2426_180620	PvdS	iron gene regulation
sediment	44A_bin.7	KSB1	ExbB-family	ExbB	iron aquisition siderophore transport potential
sediment	44A_bin.7	KSB1	ExbD-family	ExbD	iron aquisition siderophore transport potential
sediment	44A_bin.7	KSB1	ExbD-family	ExbD	iron aquisition siderophore transport potential
sediment	44A_bin.7	KSB1	ExbD-family	ExbD	iron aquisition siderophore transport potential
sediment	44A_bin.7	KSB1	ExbB-family	ExbB	iron aquisition siderophore transport potential
sediment	44A_bin.7	KSB1	Sid_PvdS_regulator_Paeruginosa_PA2426_180620	PvdS	iron gene regulation
sediment	44A_bin.7	KSB1	Sid_PvdS_regulator_Paeruginosa_PA2426_180620	PvdS	iron gene regulation
sediment	44A_bin.7	KSB1	Sid_PvdS_regulator_Paeruginosa_PA2426_180620	PvdS	iron gene regulation
sediment	44A_bin.7	KSB1	PF04773_FecR	FecR	iron gene regulation
sediment	44A_bin.8	Proteobacteria	ExbD-family	ExbD	iron aquisition siderophore transport potential
sediment	44A_bin.8	Proteobacteria	ExbB-family	ExbB	iron aquisition siderophore transport potential
sediment	44A_bin.8	Proteobacteria	PF04773_FecR	FecR	iron gene regulation
sediment	44A_bin.8	Proteobacteria	ExbB-family	ExbB	iron aquisition siderophore transport potential
sediment	44A_bin.8	Proteobacteria	ExbB-family	ExbB	iron aquisition siderophore transport potential
sediment	44A_bin.8	Proteobacteria	ExbD-family	ExbD	iron aquisition siderophore transport potential
sediment	44A_bin.8	Proteobacteria	TonB-family	TonB	iron aquisition siderophore transport potential
sediment	44A_bin.8	Proteobacteria	ExbB-family	ExbB	iron aquisition siderophore transport potential
sediment	44A_bin.8	Proteobacteria	ExbD-family	ExbD	iron aquisition siderophore transport potential
sediment	44A_bin.8	Proteobacteria	TonB-family	TonB	iron aquisition siderophore transport potential
sediment	44A_bin.8	Proteobacteria	ExbB-family	ExbB	iron aquisition siderophore transport potential
sediment	44A_bin.8	Proteobacteria	ExbD-family	ExbD	iron aquisition siderophore transport potential
sediment	44A_bin.8	Proteobacteria	ExbD-family	ExbD	iron aquisition siderophore transport potential
sediment	44A_bin.9	Gemmatimonadota	FbpB-FutB-family-iron-permease	FbpB	iron aquisition iron transport
sediment	44A_bin.9	Gemmatimonadota	FbpB-family-iron-permease	FbpB	iron aquisition iron transport
sediment	44A_bin.9	Gemmatimonadota	ExbB-family	ExbB	iron aquisition siderophore transport potential
sediment	44A_bin.9	Gemmatimonadota	ExbD-family	ExbD	iron aquisition siderophore transport potential
sediment	44A_bin.9	Gemmatimonadota	TonB-family	TonB	iron aquisition siderophore transport potential
sediment	44A_bin.9	Gemmatimonadota	Sid_PvdS_regulator_Paeruginosa_PA2426_180620	PvdS	iron gene regulation
sediment	44A_bin.9	Gemmatimonadota	Sid_PvdS_regulator_Paeruginosa_PA2426_180620	PvdS	iron gene regulation
sediment	44A_bin.9	Gemmatimonadota	Sid_PvdS_regulator_Paeruginosa_PA2426_180620	PvdS	iron gene regulation
sediment	45A_bin.1	Proteobacteria	TonB-family	TonB	iron aquisition siderophore transport potential
sediment	45A_bin.1	Proteobacteria	ExbD-family	ExbD	iron aquisition siderophore transport potential
sediment	45A_bin.1	Proteobacteria	ExbB-family	ExbB	iron aquisition siderophore transport potential
sediment	45A_bin.1	Proteobacteria	TonB-family	TonB	iron aquisition siderophore transport potential
sediment	45A_bin.1	Proteobacteria	ExbB-family	ExbB	iron aquisition siderophore transport potential
sediment	45A_bin.1	Proteobacteria	ExbD-family	ExbD	iron aquisition siderophore transport potential
sediment	45A_bin.1	Proteobacteria	ExbB-family	ExbB	iron aquisition siderophore transport potential
sediment	45A_bin.1	Proteobacteria	ExbD-family	ExbD	iron aquisition siderophore transport potential
sediment	45A_bin.1	Proteobacteria	TonB-family	TonB	iron aquisition siderophore transport potential
sediment	45A_bin.1	Proteobacteria	ExbD-family	ExbD	iron aquisition siderophore transport potential
sediment	45A_bin.1	Proteobacteria	ExbB-family	ExbB	iron aquisition siderophore transport potential
sediment	45A_bin.1	Proteobacteria	ExbD-family	ExbD	iron aquisition siderophore transport potential
sediment	45A_bin.1	Proteobacteria	ExbB-family	ExbB	iron aquisition siderophore transport potential
sediment	45A_bin.10	Proteobacteria	FbpB-family-iron-permease	FbpB	iron aquisition iron transport
sediment	45A_bin.10	Proteobacteria	FbpB-FutB-family-iron-permease	FbpB	iron aquisition iron transport
sediment	45A_bin.10	Proteobacteria	ExbD-family	ExbD	iron aquisition siderophore transport potential
sediment	45A_bin.10	Proteobacteria	ExbB-family	ExbB	iron aquisition siderophore transport potential
sediment	45A_bin.10	Proteobacteria	PF04773_FecR	FecR	iron gene regulation
sediment	45A_bin.10	Proteobacteria	PF04773_FecR	FecR	iron gene regulation
sediment	45A_bin.11	Methylomirabilota	FbpB-FutB-family-iron-permease	FbpB	iron aquisition iron transport
sediment	45A_bin.11	Methylomirabilota	TonB-family	TonB	iron aquisition siderophore transport potential
sediment	45A_bin.11	Methylomirabilota	ExbB-family	ExbB	iron aquisition siderophore transport potential
sediment	45A_bin.11	Methylomirabilota	ExbD-family	ExbD	iron aquisition siderophore transport potential
sediment	45A_bin.11	Methylomirabilota	TonB-family	TonB	iron aquisition siderophore transport potential
sediment	45A_bin.11	Methylomirabilota	TonB-family	TonB	iron aquisition siderophore transport potential
sediment	45A_bin.11	Methylomirabilota	ExbB-family	ExbB	iron aquisition siderophore transport potential
sediment	45A_bin.11	Methylomirabilota	Sid_PvdS_regulator_Paeruginosa_PA2426_180620	PvdS	iron gene regulation
sediment	45A_bin.11	Methylomirabilota	Sid_PvdS_regulator_Paeruginosa_PA2426_180620	PvdS	iron gene regulation
sediment	45A_bin.11	Methylomirabilota	Sid_PvdS_regulator_Paeruginosa_PA2426_180620	PvdS	iron gene regulation
sediment	45A_bin.11	Methylomirabilota	Sid_PvdS_regulator_Paeruginosa_PA2426_180620	PvdS	iron gene regulation
sediment	45A_bin.12	Gemmatimonadota	FbpB-FutB-family-iron-permease	FbpB	iron aquisition iron transport
sediment	45A_bin.12	Gemmatimonadota	TonB-family	TonB	iron aquisition siderophore transport potential
sediment	45A_bin.12	Gemmatimonadota	ExbD-family	ExbD	iron aquisition siderophore transport potential
sediment	45A_bin.12	Gemmatimonadota	ExbD-family	ExbD	iron aquisition siderophore transport potential
sediment	45A_bin.12	Gemmatimonadota	ExbB-family	ExbB	iron aquisition siderophore transport potential
sediment	45A_bin.12	Gemmatimonadota	TonB-family	TonB	iron aquisition siderophore transport potential
sediment	45A_bin.12	Gemmatimonadota	ExbB-family	ExbB	iron aquisition siderophore transport potential
sediment	45A_bin.12	Gemmatimonadota	Sid_PvdS_regulator_Paeruginosa_PA2426_180620	PvdS	iron gene regulation
sediment	45A_bin.12	Gemmatimonadota	Sid_PvdS_regulator_Paeruginosa_PA2426_180620	PvdS	iron gene regulation
sediment	45A_bin.13	Proteobacteria	ExbD-family	ExbD	iron aquisition siderophore transport potential
sediment	45A_bin.13	Proteobacteria	ExbB-family	ExbB	iron aquisition siderophore transport potential
sediment	45A_bin.13	Proteobacteria	Sid_PvdS_regulator_Paeruginosa_PA2426_180620	PvdS	iron gene regulation
sediment	45A_bin.13	Proteobacteria	PF04773_FecR	FecR	iron gene regulation
sediment	45A_bin.13	Proteobacteria	FbpB-FutB-family-iron-permease	FbpB	iron aquisition iron transport
sediment	45A_bin.2	Proteobacteria	ExbB-family	ExbB	iron aquisition siderophore transport potential
sediment	45A_bin.2	Proteobacteria	ExbD-family	ExbD	iron aquisition siderophore transport potential
sediment	45A_bin.2	Proteobacteria	PF04773_FecR	FecR	iron gene regulation
sediment	45A_bin.2	Proteobacteria	PF04773_FecR	FecR	iron gene regulation
sediment	45A_bin.2	Proteobacteria	TonB-family	TonB	iron aquisition siderophore transport potential
sediment	45A_bin.2	Proteobacteria	ExbB-family	ExbB	iron aquisition siderophore transport potential
sediment	45A_bin.2	Proteobacteria	ExbD-family	ExbD	iron aquisition siderophore transport potential
sediment	45A_bin.2	Proteobacteria	ExbB-family	ExbB	iron aquisition siderophore transport potential
sediment	45A_bin.2	Proteobacteria	ExbD-family	ExbD	iron aquisition siderophore transport potential
sediment	45A_bin.2	Proteobacteria	TonB-family	TonB	iron aquisition siderophore transport potential
sediment	45A_bin.2	Proteobacteria	FbpB-FutB-family-iron-permease	FbpB	iron aquisition iron transport
sediment	45A_bin.3	Proteobacteria	FbpB-family-iron-permease	FbpB	iron aquisition iron transport
sediment	45A_bin.3	Proteobacteria	FbpB-family-iron-permease	FbpB	iron aquisition iron transport
sediment	45A_bin.3	Proteobacteria	FbpB-family-iron-permease	FbpB	iron aquisition iron transport
sediment	45A_bin.3	Proteobacteria	FbpB-family-iron-permease	FbpB	iron aquisition iron transport
sediment	45A_bin.3	Proteobacteria	FbpB-FutB-family-iron-permease	FbpB	iron aquisition iron transport
sediment	45A_bin.3	Proteobacteria	ExbB-family	ExbB	iron aquisition siderophore transport potential
sediment	45A_bin.3	Proteobacteria	ExbD-family	ExbD	iron aquisition siderophore transport potential
sediment	45A_bin.3	Proteobacteria	FbpB-family-iron-permease	FbpB	iron aquisition iron transport
sediment	45A_bin.4	Methylomirabilota	FbpB-FutB-family-iron-permease	FbpB	iron aquisition iron transport
sediment	45A_bin.4	Methylomirabilota	ExbB-family	ExbB	iron aquisition siderophore transport potential
sediment	45A_bin.4	Methylomirabilota	ExbD-family	ExbD	iron aquisition siderophore transport potential
sediment	45A_bin.4	Methylomirabilota	TonB-family	TonB	iron aquisition siderophore transport potential
sediment	45A_bin.4	Methylomirabilota	Sid_PvdS_regulator_Paeruginosa_PA2426_180620	PvdS	iron gene regulation
sediment	45A_bin.4	Methylomirabilota	Sid_PvdS_regulator_Paeruginosa_PA2426_180620	PvdS	iron gene regulation
sediment	45A_bin.5	Proteobacteria	ExbB-family	ExbB	iron aquisition siderophore transport potential
sediment	45A_bin.5	Proteobacteria	ExbD-family	ExbD	iron aquisition siderophore transport potential
sediment	45A_bin.5	Proteobacteria	ExbB-family	ExbB	iron aquisition siderophore transport potential
sediment	45A_bin.5	Proteobacteria	ExbD-family	ExbD	iron aquisition siderophore transport potential
sediment	45A_bin.5	Proteobacteria	TonB-family	TonB	iron aquisition siderophore transport potential
sediment	45A_bin.5	Proteobacteria	PF04773_FecR	FecR	iron gene regulation
sediment	45A_bin.5	Proteobacteria	TonB-family	TonB	iron aquisition siderophore transport potential
sediment	45A_bin.5	Proteobacteria	ExbD-family	ExbD	iron aquisition siderophore transport potential
sediment	45A_bin.5	Proteobacteria	ExbB-family	ExbB	iron aquisition siderophore transport potential
sediment	45A_bin.5	Proteobacteria	ExbB-family	ExbB	iron aquisition siderophore transport potential
sediment	45A_bin.5	Proteobacteria	TonB-family	TonB	iron aquisition siderophore transport potential
sediment	45A_bin.5	Proteobacteria	ExbD-family	ExbD	iron aquisition siderophore transport potential
sediment	45A_bin.5	Proteobacteria	ExbD-family	ExbD	iron aquisition siderophore transport potential
sediment	45A_bin.5	Proteobacteria	ExbB-family	ExbB	iron aquisition siderophore transport potential
sediment	45A_bin.5	Proteobacteria	ExbB-family	ExbB	iron aquisition siderophore transport potential
sediment	45A_bin.5	Proteobacteria	ExbB-family	ExbB	iron aquisition siderophore transport potential
sediment	45A_bin.5	Proteobacteria	ExbD-family	ExbD	iron aquisition siderophore transport potential
sediment	45A_bin.5	Proteobacteria	ExbD-family	ExbD	iron aquisition siderophore transport potential
sediment	45A_bin.5	Proteobacteria	PF04773_FecR	FecR	iron gene regulation
sediment	45A_bin.5	Proteobacteria	FbpB-FutB-family-iron-permease	FbpB	iron aquisition iron transport
sediment	45A_bin.6	Acidobacteriota	ExbD-family	ExbD	iron aquisition siderophore transport potential
sediment	45A_bin.6	Acidobacteriota	ExbB-family	ExbB	iron aquisition siderophore transport potential
sediment	45A_bin.6	Acidobacteriota	TonB-family	TonB	iron aquisition siderophore transport potential
sediment	45A_bin.6	Acidobacteriota	Sid_PvdS_regulator_Paeruginosa_PA2426_180620	PvdS	iron gene regulation
sediment	45A_bin.6	Acidobacteriota	Sid_PvdS_regulator_Paeruginosa_PA2426_180620	PvdS	iron gene regulation
sediment	45A_bin.6	Acidobacteriota	PF04773_FecR	FecR	iron gene regulation
sediment	45A_bin.7	Nitrospirota	FbpB-FutB-family-iron-permease	FbpB	iron aquisition iron transport
sediment	45A_bin.7	Nitrospirota	Sid_PvdS_regulator_Paeruginosa_PA2426_180620	PvdS	iron gene regulation
sediment	45A_bin.7	Nitrospirota	Sid_PvdS_regulator_Paeruginosa_PA2426_180620	PvdS	iron gene regulation
sediment	45A_bin.8	Proteobacteria	ExbD-family	ExbD	iron aquisition siderophore transport potential
sediment	45A_bin.8	Proteobacteria	ExbB-family	ExbB	iron aquisition siderophore transport potential
sediment	45A_bin.8	Proteobacteria	ExbB-family	ExbB	iron aquisition siderophore transport potential
sediment	45A_bin.8	Proteobacteria	ExbD-family	ExbD	iron aquisition siderophore transport potential
sediment	45A_bin.8	Proteobacteria	ExbD-family	ExbD	iron aquisition siderophore transport potential
sediment	45A_bin.8	Proteobacteria	ExbB-family	ExbB	iron aquisition siderophore transport potential
sediment	45A_bin.8	Proteobacteria	ExbD-family	ExbD	iron aquisition siderophore transport potential
sediment	45A_bin.8	Proteobacteria	TonB-family	TonB	iron aquisition siderophore transport potential
sediment	45A_bin.8	Proteobacteria	Sid_PvdS_regulator_Paeruginosa_PA2426_180620	PvdS	iron gene regulation
sediment	45A_bin.8	Proteobacteria	PF04773_FecR	FecR	iron gene regulation
sediment	45A_bin.8	Proteobacteria	FbpB-FutB-family-iron-permease	FbpB	iron aquisition iron transport
sediment	45A_bin.9	Proteobacteria	ExbB-family	ExbB	iron aquisition siderophore transport potential
sediment	45A_bin.9	Proteobacteria	ExbD-family	ExbD	iron aquisition siderophore transport potential
sediment	45A_bin.9	Proteobacteria	TonB-family	TonB	iron aquisition siderophore transport potential
sediment	45A_bin.9	Proteobacteria	PF04773_FecR	FecR	iron gene regulation
sediment	45A_bin.9	Proteobacteria	TonB-family	TonB	iron aquisition siderophore transport potential
sediment	45A_bin.9	Proteobacteria	ExbD-family	ExbD	iron aquisition siderophore transport potential
sediment	45A_bin.9	Proteobacteria	ExbB-family	ExbB	iron aquisition siderophore transport potential
sediment	45A_bin.9	Proteobacteria	ExbB-family	ExbB	iron aquisition siderophore transport potential
sediment	45A_bin.9	Proteobacteria	ExbB-family	ExbB	iron aquisition siderophore transport potential
sediment	45A_bin.9	Proteobacteria	ExbD-family	ExbD	iron aquisition siderophore transport potential
sediment	45A_bin.9	Proteobacteria	TonB-family	TonB	iron aquisition siderophore transport potential
sediment	45A_bin.9	Proteobacteria	ExbB-family	ExbB	iron aquisition siderophore transport potential
sediment	45A_bin.9	Proteobacteria	ExbD-family	ExbD	iron aquisition siderophore transport potential
sediment	45A_bin.9	Proteobacteria	Sid_PvdS_regulator_Paeruginosa_PA2426_180620	PvdS	iron gene regulation
sediment	45A_bin.9	Proteobacteria	PF04773_FecR	FecR	iron gene regulation
sediment	46A_bin.1	Proteobacteria	ExbB-family	ExbB	iron aquisition siderophore transport potential
sediment	46A_bin.1	Proteobacteria	ExbD-family	ExbD	iron aquisition siderophore transport potential
sediment	46A_bin.1	Proteobacteria	ExbB-family	ExbB	iron aquisition siderophore transport potential
sediment	46A_bin.1	Proteobacteria	ExbD-family	ExbD	iron aquisition siderophore transport potential
sediment	46A_bin.1	Proteobacteria	PF04773_FecR	FecR	iron gene regulation
sediment	46A_bin.1	Proteobacteria	TonB-family	TonB	iron aquisition siderophore transport potential
sediment	46A_bin.1	Proteobacteria	ExbD-family	ExbD	iron aquisition siderophore transport potential
sediment	46A_bin.1	Proteobacteria	ExbB-family	ExbB	iron aquisition siderophore transport potential
sediment	46A_bin.1	Proteobacteria	Sid_PvdS_regulator_Paeruginosa_PA2426_180620	PvdS	iron gene regulation
sediment	46A_bin.1	Proteobacteria	PF04773_FecR	FecR	iron gene regulation
sediment	46A_bin.2	Methylomirabilota	TonB-family	TonB	iron aquisition siderophore transport potential
sediment	46A_bin.2	Methylomirabilota	ExbD-family	ExbD	iron aquisition siderophore transport potential
sediment	46A_bin.2	Methylomirabilota	ExbB-family	ExbB	iron aquisition siderophore transport potential
sediment	46A_bin.2	Methylomirabilota	TonB-family	TonB	iron aquisition siderophore transport potential
sediment	46A_bin.2	Methylomirabilota	Sid_PvdS_regulator_Paeruginosa_PA2426_180620	PvdS	iron gene regulation
sediment	46A_bin.2	Methylomirabilota	Sid_PvdS_regulator_Paeruginosa_PA2426_180620	PvdS	iron gene regulation
sediment	46A_bin.3	Proteobacteria	ExbB-family	ExbB	iron aquisition siderophore transport potential
sediment	46A_bin.3	Proteobacteria	ExbD-family	ExbD	iron aquisition siderophore transport potential
sediment	46A_bin.3	Proteobacteria	Sid_PvdS_regulator_Paeruginosa_PA2426_180620	PvdS	iron gene regulation
sediment	46A_bin.3	Proteobacteria	PF04773_FecR	FecR	iron gene regulation
sediment	46A_bin.3	Proteobacteria	TonB-family	TonB	iron aquisition siderophore transport potential
sediment	46A_bin.3	Proteobacteria	ExbD-family	ExbD	iron aquisition siderophore transport potential
sediment	46A_bin.3	Proteobacteria	ExbB-family	ExbB	iron aquisition siderophore transport potential
sediment	46A_bin.3	Proteobacteria	ExbD-family	ExbD	iron aquisition siderophore transport potential
sediment	46A_bin.3	Proteobacteria	ExbD-family	ExbD	iron aquisition siderophore transport potential
sediment	46A_bin.3	Proteobacteria	ExbB-family	ExbB	iron aquisition siderophore transport potential
sediment	46A_bin.3	Proteobacteria	PF04773_FecR	FecR	iron gene regulation
sediment	46A_bin.4	Proteobacteria	FbpB-family-iron-permease	FbpB	iron aquisition iron transport
sediment	46A_bin.4	Proteobacteria	FbpB-family-iron-permease	FbpB	iron aquisition iron transport
sediment	46A_bin.4	Proteobacteria	FbpB-family-iron-permease	FbpB	iron aquisition iron transport
sediment	46A_bin.4	Proteobacteria	PF04773_FecR	FecR	iron gene regulation
sediment	46A_bin.5	Nitrospirota	FbpB-FutB-family-iron-permease	FbpB	iron aquisition iron transport
sediment	46A_bin.5	Nitrospirota	ExbB-family	ExbB	iron aquisition siderophore transport potential
sediment	46A_bin.5	Nitrospirota	ExbD-family	ExbD	iron aquisition siderophore transport potential
sediment	46A_bin.5	Nitrospirota	TonB-family	TonB	iron aquisition siderophore transport potential
sediment	46A_bin.5	Nitrospirota	Sid_PvdS_regulator_Paeruginosa_PA2426_180620	PvdS	iron gene regulation
sediment	46A_bin.5	Nitrospirota	Sid_PvdS_regulator_Paeruginosa_PA2426_180620	PvdS	iron gene regulation
sediment	46A_bin.6	Proteobacteria	ExbB-family	ExbB	iron aquisition siderophore transport potential
sediment	46A_bin.6	Proteobacteria	ExbD-family	ExbD	iron aquisition siderophore transport potential
sediment	46A_bin.6	Proteobacteria	TonB-family	TonB	iron aquisition siderophore transport potential
sediment	46A_bin.6	Proteobacteria	ExbB-family	ExbB	iron aquisition siderophore transport potential
sediment	46A_bin.6	Proteobacteria	ExbB-family	ExbB	iron aquisition siderophore transport potential
sediment	46A_bin.6	Proteobacteria	ExbD-family	ExbD	iron aquisition siderophore transport potential
sediment	46A_bin.6	Proteobacteria	TonB-family	TonB	iron aquisition siderophore transport potential
sediment	46A_bin.6	Proteobacteria	TonB-family	TonB	iron aquisition siderophore transport potential
sediment	46A_bin.6	Proteobacteria	ExbD-family	ExbD	iron aquisition siderophore transport potential
sediment	46A_bin.6	Proteobacteria	ExbD-family	ExbD	iron aquisition siderophore transport potential
sediment	46A_bin.6	Proteobacteria	ExbB-family	ExbB	iron aquisition siderophore transport potential
sediment	46A_bin.6	Proteobacteria	ExbD-family	ExbD	iron aquisition siderophore transport potential
sediment	46A_bin.6	Proteobacteria	ExbB-family	ExbB	iron aquisition siderophore transport potential
sediment	46A_bin.6	Proteobacteria	ExbB-family	ExbB	iron aquisition siderophore transport potential
sediment	46A_bin.6	Proteobacteria	ExbD-family	ExbD	iron aquisition siderophore transport potential
sediment	46A_bin.6	Proteobacteria	Sid_PvdS_regulator_Paeruginosa_PA2426_180620	PvdS	iron gene regulation
sediment	46A_bin.6	Proteobacteria	PF04773_FecR	FecR	iron gene regulation
sediment	46A_bin.6	Proteobacteria	FbpB-FutB-family-iron-permease	FbpB	iron aquisition iron transport
sediment	46A_bin.7	Proteobacteria	ExbD-family	ExbD	iron aquisition siderophore transport potential
sediment	46A_bin.7	Proteobacteria	ExbB-family	ExbB	iron aquisition siderophore transport potential
sediment	46A_bin.7	Proteobacteria	FbpB-family-iron-permease	FbpB	iron aquisition iron transport
sediment	46A_bin.7	Proteobacteria	TonB-family	TonB	iron aquisition siderophore transport potential
sediment	46A_bin.7	Proteobacteria	ExbD-family	ExbD	iron aquisition siderophore transport potential
sediment	46A_bin.7	Proteobacteria	ExbB-family	ExbB	iron aquisition siderophore transport potential
sediment	46A_bin.7	Proteobacteria	Sid_PvdS_regulator_Paeruginosa_PA2426_180620	PvdS	iron gene regulation
sediment	46A_bin.7	Proteobacteria	FbpB-FutB-family-iron-permease	FbpB	iron aquisition iron transport
sediment	46A_bin.8	Proteobacteria	ExbD-family	ExbD	iron aquisition siderophore transport potential
sediment	46A_bin.8	Proteobacteria	ExbB-family	ExbB	iron aquisition siderophore transport potential
sediment	46A_bin.8	Proteobacteria	PF04773_FecR	FecR	iron gene regulation
sediment	46A_bin.8	Proteobacteria	PF04773_FecR	FecR	iron gene regulation
sediment	46A_bin.8	Proteobacteria	PF04773_FecR	FecR	iron gene regulation
sediment	46A_bin.9	Methylomirabilota	FbpB-FutB-family-iron-permease	FbpB	iron aquisition iron transport
sediment	46A_bin.9	Methylomirabilota	TonB-family	TonB	iron aquisition siderophore transport potential
sediment	46A_bin.9	Methylomirabilota	ExbB-family	ExbB	iron aquisition siderophore transport potential
sediment	46A_bin.9	Methylomirabilota	ExbD-family	ExbD	iron aquisition siderophore transport potential
sediment	46A_bin.9	Methylomirabilota	TonB-family	TonB	iron aquisition siderophore transport potential
sediment	46A_bin.9	Methylomirabilota	Sid_PvdS_regulator_Paeruginosa_PA2426_180620	PvdS	iron gene regulation
sediment	46A_bin.9	Methylomirabilota	Sid_PvdS_regulator_Paeruginosa_PA2426_180620	PvdS	iron gene regulation
sediment	47A_bin.1	Methylomirabilota	FbpB-FutB-family-iron-permease	FbpB	iron aquisition iron transport
sediment	47A_bin.1	Methylomirabilota	TonB-family	TonB	iron aquisition siderophore transport potential
sediment	47A_bin.1	Methylomirabilota	ExbB-family	ExbB	iron aquisition siderophore transport potential
sediment	47A_bin.1	Methylomirabilota	ExbD-family	ExbD	iron aquisition siderophore transport potential
sediment	47A_bin.1	Methylomirabilota	TonB-family	TonB	iron aquisition siderophore transport potential
sediment	47A_bin.1	Methylomirabilota	Sid_PvdS_regulator_Paeruginosa_PA2426_180620	PvdS	iron gene regulation
sediment	47A_bin.1	Methylomirabilota	Sid_PvdS_regulator_Paeruginosa_PA2426_180620	PvdS	iron gene regulation
sediment	47A_bin.1	Methylomirabilota	Sid_PvdS_regulator_Paeruginosa_PA2426_180620	PvdS	iron gene regulation
sediment	47A_bin.10	Proteobacteria	FbpB-family-iron-permease	FbpB	iron aquisition iron transport
sediment	47A_bin.10	Proteobacteria	FbpB-FutB-family-iron-permease	FbpB	iron aquisition iron transport
sediment	47A_bin.10	Proteobacteria	ExbD-family	ExbD	iron aquisition siderophore transport potential
sediment	47A_bin.10	Proteobacteria	ExbB-family	ExbB	iron aquisition siderophore transport potential
sediment	47A_bin.10	Proteobacteria	PF04773_FecR	FecR	iron gene regulation
sediment	47A_bin.10	Proteobacteria	PF04773_FecR	FecR	iron gene regulation
sediment	47A_bin.10	Proteobacteria	PF04773_FecR	FecR	iron gene regulation
sediment	47A_bin.10	Proteobacteria	PF04773_FecR	FecR	iron gene regulation
sediment	47A_bin.11	Methylomirabilota	TonB-family	TonB	iron aquisition siderophore transport potential
sediment	47A_bin.11	Methylomirabilota	Sid_PvdS_regulator_Paeruginosa_PA2426_180620	PvdS	iron gene regulation
sediment	47A_bin.11	Methylomirabilota	TonB-family	TonB	iron aquisition siderophore transport potential
sediment	47A_bin.11	Methylomirabilota	ExbD-family	ExbD	iron aquisition siderophore transport potential
sediment	47A_bin.11	Methylomirabilota	ExbB-family	ExbB	iron aquisition siderophore transport potential
sediment	47A_bin.11	Methylomirabilota	Sid_PvdS_regulator_Paeruginosa_PA2426_180620	PvdS	iron gene regulation
sediment	47A_bin.11	Methylomirabilota	Sid_PvdS_regulator_Paeruginosa_PA2426_180620	PvdS	iron gene regulation
sediment	47A_bin.12	Proteobacteria	ExbD-family	ExbD	iron aquisition siderophore transport potential
sediment	47A_bin.12	Proteobacteria	ExbB-family	ExbB	iron aquisition siderophore transport potential
sediment	47A_bin.12	Proteobacteria	PF04773_FecR	FecR	iron gene regulation
sediment	47A_bin.12	Proteobacteria	ExbB-family	ExbB	iron aquisition siderophore transport potential
sediment	47A_bin.12	Proteobacteria	ExbB-family	ExbB	iron aquisition siderophore transport potential
sediment	47A_bin.12	Proteobacteria	ExbD-family	ExbD	iron aquisition siderophore transport potential
sediment	47A_bin.12	Proteobacteria	TonB-family	TonB	iron aquisition siderophore transport potential
sediment	47A_bin.12	Proteobacteria	TonB-family	TonB	iron aquisition siderophore transport potential
sediment	47A_bin.12	Proteobacteria	ExbD-family	ExbD	iron aquisition siderophore transport potential
sediment	47A_bin.12	Proteobacteria	ExbB-family	ExbB	iron aquisition siderophore transport potential
sediment	47A_bin.12	Proteobacteria	Sid_PvdS_regulator_Paeruginosa_PA2426_180620	PvdS	iron gene regulation
sediment	47A_bin.12	Proteobacteria	FbpB-FutB-family-iron-permease	FbpB	iron aquisition iron transport
sediment	47A_bin.13	Proteobacteria	ExbB-family	ExbB	iron aquisition siderophore transport potential
sediment	47A_bin.13	Proteobacteria	ExbD-family	ExbD	iron aquisition siderophore transport potential
sediment	47A_bin.13	Proteobacteria	TonB-family	TonB	iron aquisition siderophore transport potential
sediment	47A_bin.13	Proteobacteria	ExbB-family	ExbB	iron aquisition siderophore transport potential
sediment	47A_bin.13	Proteobacteria	ExbD-family	ExbD	iron aquisition siderophore transport potential
sediment	47A_bin.13	Proteobacteria	TonB-family	TonB	iron aquisition siderophore transport potential
sediment	47A_bin.13	Proteobacteria	ExbD-family	ExbD	iron aquisition siderophore transport potential
sediment	47A_bin.13	Proteobacteria	ExbD-family	ExbD	iron aquisition siderophore transport potential
sediment	47A_bin.13	Proteobacteria	ExbB-family	ExbB	iron aquisition siderophore transport potential
sediment	47A_bin.13	Proteobacteria	Sid_PvdS_regulator_Paeruginosa_PA2426_180620	PvdS	iron gene regulation
sediment	47A_bin.13	Proteobacteria	PF04773_FecR	FecR	iron gene regulation
sediment	47A_bin.13	Proteobacteria	FbpB-FutB-family-iron-permease	FbpB	iron aquisition iron transport
sediment	47A_bin.14	Acidobacteriota	FbpB-FutB-family-iron-permease	FbpB	iron aquisition iron transport
sediment	47A_bin.14	Acidobacteriota	ExbB-family	ExbB	iron aquisition siderophore transport potential
sediment	47A_bin.14	Acidobacteriota	ExbD-family	ExbD	iron aquisition siderophore transport potential
sediment	47A_bin.14	Acidobacteriota	Sid_PvdS_regulator_Paeruginosa_PA2426_180620	PvdS	iron gene regulation
sediment	47A_bin.14	Acidobacteriota	Sid_PvdS_regulator_Paeruginosa_PA2426_180620	PvdS	iron gene regulation
sediment	47A_bin.14	Acidobacteriota	PF04773_FecR	FecR	iron gene regulation
sediment	47A_bin.2	Proteobacteria	ExbD-family	ExbD	iron aquisition siderophore transport potential
sediment	47A_bin.2	Proteobacteria	ExbB-family	ExbB	iron aquisition siderophore transport potential
sediment	47A_bin.2	Proteobacteria	PF04773_FecR	FecR	iron gene regulation
sediment	47A_bin.2	Proteobacteria	TonB-family	TonB	iron aquisition siderophore transport potential
sediment	47A_bin.2	Proteobacteria	ExbB-family	ExbB	iron aquisition siderophore transport potential
sediment	47A_bin.2	Proteobacteria	ExbB-family	ExbB	iron aquisition siderophore transport potential
sediment	47A_bin.2	Proteobacteria	ExbD-family	ExbD	iron aquisition siderophore transport potential
sediment	47A_bin.2	Proteobacteria	TonB-family	TonB	iron aquisition siderophore transport potential
sediment	47A_bin.2	Proteobacteria	ExbB-family	ExbB	iron aquisition siderophore transport potential
sediment	47A_bin.2	Proteobacteria	ExbD-family	ExbD	iron aquisition siderophore transport potential
sediment	47A_bin.2	Proteobacteria	ExbD-family	ExbD	iron aquisition siderophore transport potential
sediment	47A_bin.2	Proteobacteria	TonB-family	TonB	iron aquisition siderophore transport potential
sediment	47A_bin.2	Proteobacteria	ExbD-family	ExbD	iron aquisition siderophore transport potential
sediment	47A_bin.2	Proteobacteria	Sid_PvdS_regulator_Paeruginosa_PA2426_180620	PvdS	iron gene regulation
sediment	47A_bin.2	Proteobacteria	PF04773_FecR	FecR	iron gene regulation
sediment	47A_bin.3	Nitrospirota	FbpB-FutB-family-iron-permease	FbpB	iron aquisition iron transport
sediment	47A_bin.3	Nitrospirota	Sid_PvdS_regulator_Paeruginosa_PA2426_180620	PvdS	iron gene regulation
sediment	47A_bin.3	Nitrospirota	Sid_PvdS_regulator_Paeruginosa_PA2426_180620	PvdS	iron gene regulation
sediment	47A_bin.4	Desulfobacterota_B	FbpB-family-iron-permease	FbpB	iron aquisition iron transport
sediment	47A_bin.4	Desulfobacterota_B	FbpB-family-iron-permease	FbpB	iron aquisition iron transport
sediment	47A_bin.4	Desulfobacterota_B	FbpB-FutB-family-iron-permease	FbpB	iron aquisition iron transport
sediment	47A_bin.4	Desulfobacterota_B	ExbB-family	ExbB	iron aquisition siderophore transport potential
sediment	47A_bin.4	Desulfobacterota_B	ExbD-family	ExbD	iron aquisition siderophore transport potential
sediment	47A_bin.4	Desulfobacterota_B	TonB-family	TonB	iron aquisition siderophore transport potential
sediment	47A_bin.4	Desulfobacterota_B	ExbB-family	ExbB	iron aquisition siderophore transport potential
sediment	47A_bin.4	Desulfobacterota_B	ExbD-family	ExbD	iron aquisition siderophore transport potential
sediment	47A_bin.4	Desulfobacterota_B	TonB-family	TonB	iron aquisition siderophore transport potential
sediment	47A_bin.4	Desulfobacterota_B	ExbD-family	ExbD	iron aquisition siderophore transport potential
sediment	47A_bin.4	Desulfobacterota_B	ExbB-family	ExbB	iron aquisition siderophore transport potential
sediment	47A_bin.4	Desulfobacterota_B	FbpB-FutB-family-iron-permease	FbpB	iron aquisition iron transport
sediment	47A_bin.4	Desulfobacterota_B	Sid_PvdS_regulator_Paeruginosa_PA2426_180620	PvdS	iron gene regulation
sediment	47A_bin.4	Desulfobacterota_B	PF04773_FecR	FecR	iron gene regulation
sediment	47A_bin.5	Proteobacteria	ExbD-family	ExbD	iron aquisition siderophore transport potential
sediment	47A_bin.5	Proteobacteria	ExbB-family	ExbB	iron aquisition siderophore transport potential
sediment	47A_bin.5	Proteobacteria	PF04773_FecR	FecR	iron gene regulation
sediment	47A_bin.5	Proteobacteria	PF04773_FecR	FecR	iron gene regulation
sediment	47A_bin.5	Proteobacteria	PF04773_FecR	FecR	iron gene regulation
sediment	47A_bin.6	Proteobacteria	FbpB-FutB-family-iron-permease	FbpB	iron aquisition iron transport
sediment	47A_bin.6	Proteobacteria	FbpB-family-iron-permease	FbpB	iron aquisition iron transport
sediment	47A_bin.6	Proteobacteria	FbpB-family-iron-permease	FbpB	iron aquisition iron transport
sediment	47A_bin.6	Proteobacteria	ExbD-family	ExbD	iron aquisition siderophore transport potential
sediment	47A_bin.6	Proteobacteria	ExbB-family	ExbB	iron aquisition siderophore transport potential
sediment	47A_bin.6	Proteobacteria	ExbB-family	ExbB	iron aquisition siderophore transport potential
sediment	47A_bin.6	Proteobacteria	ExbD-family	ExbD	iron aquisition siderophore transport potential
sediment	47A_bin.7	Proteobacteria	ExbD-family	ExbD	iron aquisition siderophore transport potential
sediment	47A_bin.7	Proteobacteria	ExbB-family	ExbB	iron aquisition siderophore transport potential
sediment	47A_bin.7	Proteobacteria	TonB-family	TonB	iron aquisition siderophore transport potential
sediment	47A_bin.7	Proteobacteria	ExbD-family	ExbD	iron aquisition siderophore transport potential
sediment	47A_bin.7	Proteobacteria	ExbB-family	ExbB	iron aquisition siderophore transport potential
sediment	47A_bin.7	Proteobacteria	ExbD-family	ExbD	iron aquisition siderophore transport potential
sediment	47A_bin.7	Proteobacteria	ExbB-family	ExbB	iron aquisition siderophore transport potential
sediment	47A_bin.7	Proteobacteria	TonB-family	TonB	iron aquisition siderophore transport potential
sediment	47A_bin.8	Nitrospinota	ExbB-family	ExbB	iron aquisition siderophore transport potential
sediment	47A_bin.8	Nitrospinota	ExbD-family	ExbD	iron aquisition siderophore transport potential
sediment	47A_bin.8	Nitrospinota	ExbD-family	ExbD	iron aquisition siderophore transport potential
sediment	47A_bin.8	Nitrospinota	ExbD-family	ExbD	iron aquisition siderophore transport potential
sediment	47A_bin.8	Nitrospinota	ExbB-family	ExbB	iron aquisition siderophore transport potential
sediment	47A_bin.8	Nitrospinota	PF04773_FecR	FecR	iron gene regulation
sediment	47A_bin.9	Proteobacteria	ExbB-family	ExbB	iron aquisition siderophore transport potential
sediment	47A_bin.9	Proteobacteria	ExbD-family	ExbD	iron aquisition siderophore transport potential
sediment	47A_bin.9	Proteobacteria	PF04773_FecR	FecR	iron gene regulation
sediment	47A_bin.9	Proteobacteria	PF04773_FecR	FecR	iron gene regulation
sediment	47A_bin.9	Proteobacteria	TonB-family	TonB	iron aquisition siderophore transport potential
sediment	47A_bin.9	Proteobacteria	ExbB-family	ExbB	iron aquisition siderophore transport potential
sediment	47A_bin.9	Proteobacteria	ExbD-family	ExbD	iron aquisition siderophore transport potential
sediment	47A_bin.9	Proteobacteria	ExbB-family	ExbB	iron aquisition siderophore transport potential
sediment	47A_bin.9	Proteobacteria	ExbD-family	ExbD	iron aquisition siderophore transport potential
sediment	47A_bin.9	Proteobacteria	TonB-family	TonB	iron aquisition siderophore transport potential
sediment	47A_bin.9	Proteobacteria	PF04773_FecR	FecR	iron gene regulation
sediment	BC1_bin.1	Desulfobacterota_B	TonB-family	TonB	iron aquisition siderophore transport potential
sediment	BC1_bin.1	Desulfobacterota_B	ExbD-family	ExbD	iron aquisition siderophore transport potential
sediment	BC1_bin.1	Desulfobacterota_B	ExbB-family	ExbB	iron aquisition siderophore transport potential
sediment	BC1_bin.1	Desulfobacterota_B	TonB-family	TonB	iron aquisition siderophore transport potential
sediment	BC1_bin.1	Desulfobacterota_B	ExbD-family	ExbD	iron aquisition siderophore transport potential
sediment	BC1_bin.1	Desulfobacterota_B	ExbB-family	ExbB	iron aquisition siderophore transport potential
sediment	BC1_bin.1	Desulfobacterota_B	ExbD-family	ExbD	iron aquisition siderophore transport potential
sediment	BC1_bin.1	Desulfobacterota_B	ExbB-family	ExbB	iron aquisition siderophore transport potential
sediment	BC1_bin.10	Methylomirabilota	FbpB-FutB-family-iron-permease	FbpB	iron aquisition iron transport
sediment	BC1_bin.10	Methylomirabilota	TonB-family	TonB	iron aquisition siderophore transport potential
sediment	BC1_bin.10	Methylomirabilota	FbpB-family-iron-permease	FbpB	iron aquisition iron transport
sediment	BC1_bin.10	Methylomirabilota	ExbB-family	ExbB	iron aquisition siderophore transport potential
sediment	BC1_bin.10	Methylomirabilota	ExbD-family	ExbD	iron aquisition siderophore transport potential
sediment	BC1_bin.10	Methylomirabilota	TonB-family	TonB	iron aquisition siderophore transport potential
sediment	BC1_bin.10	Methylomirabilota	Sid_PvdS_regulator_Paeruginosa_PA2426_180620	PvdS	iron gene regulation
sediment	BC1_bin.10	Methylomirabilota	Sid_PvdS_regulator_Paeruginosa_PA2426_180620	PvdS	iron gene regulation
sediment	BC1_bin.11	KSB1	ExbD-family	ExbD	iron aquisition siderophore transport potential
sediment	BC1_bin.11	KSB1	ExbB-family	ExbB	iron aquisition siderophore transport potential
sediment	BC1_bin.11	KSB1	TonB-family	TonB	iron aquisition siderophore transport potential
sediment	BC1_bin.11	KSB1	ExbD-family	ExbD	iron aquisition siderophore transport potential
sediment	BC1_bin.11	KSB1	ExbB-family	ExbB	iron aquisition siderophore transport potential
sediment	BC1_bin.11	KSB1	ExbD-family	ExbD	iron aquisition siderophore transport potential
sediment	BC1_bin.11	KSB1	ExbD-family	ExbD	iron aquisition siderophore transport potential
sediment	BC1_bin.11	KSB1	ExbD-family	ExbD	iron aquisition siderophore transport potential
sediment	BC1_bin.11	KSB1	ExbB-family	ExbB	iron aquisition siderophore transport potential
sediment	BC1_bin.11	KSB1	Sid_PvdS_regulator_Paeruginosa_PA2426_180620	PvdS	iron gene regulation
sediment	BC1_bin.11	KSB1	Sid_PvdS_regulator_Paeruginosa_PA2426_180620	PvdS	iron gene regulation
sediment	BC1_bin.11	KSB1	Sid_PvdS_regulator_Paeruginosa_PA2426_180620	PvdS	iron gene regulation
sediment	BC1_bin.11	KSB1	Sid_PvdS_regulator_Paeruginosa_PA2426_180620	PvdS	iron gene regulation
sediment	BC1_bin.11	KSB1	PF04773_FecR	FecR	iron gene regulation
sediment	BC1_bin.11	KSB1	PF04773_FecR	FecR	iron gene regulation
sediment	BC1_bin.12	Proteobacteria	FbpB-FutB-family-iron-permease	FbpB	iron aquisition iron transport
sediment	BC1_bin.12	Proteobacteria	PF04773_FecR	FecR	iron gene regulation
sediment	BC1_bin.12	Proteobacteria	PF04773_FecR	FecR	iron gene regulation
sediment	BC1_bin.2	Proteobacteria	ExbB-family	ExbB	iron aquisition siderophore transport potential
sediment	BC1_bin.2	Proteobacteria	ExbD-family	ExbD	iron aquisition siderophore transport potential
sediment	BC1_bin.2	Proteobacteria	ExbB-family	ExbB	iron aquisition siderophore transport potential
sediment	BC1_bin.2	Proteobacteria	ExbD-family	ExbD	iron aquisition siderophore transport potential
sediment	BC1_bin.2	Proteobacteria	TonB-family	TonB	iron aquisition siderophore transport potential
sediment	BC1_bin.2	Proteobacteria	ExbB-family	ExbB	iron aquisition siderophore transport potential
sediment	BC1_bin.2	Proteobacteria	ExbD-family	ExbD	iron aquisition siderophore transport potential
sediment	BC1_bin.2	Proteobacteria	PF04773_FecR	FecR	iron gene regulation
sediment	BC1_bin.2	Proteobacteria	PF04773_FecR	FecR	iron gene regulation
sediment	BC1_bin.2	Proteobacteria	FbpB-FutB-family-iron-permease	FbpB	iron aquisition iron transport
sediment	BC1_bin.3	Actinobacteriota	FbpB-FutB-family-iron-permease	FbpB	iron aquisition iron transport
sediment	BC1_bin.3	Actinobacteriota	Sid_PvdS_regulator_Paeruginosa_PA2426_180620	PvdS	iron gene regulation
sediment	BC1_bin.4	Nitrospirota	FbpB-FutB-family-iron-permease	FbpB	iron aquisition iron transport
sediment	BC1_bin.4	Nitrospirota	FbpB-family-iron-permease	FbpB	iron aquisition iron transport
sediment	BC1_bin.4	Nitrospirota	Sid_PvdS_regulator_Paeruginosa_PA2426_180620	PvdS	iron gene regulation
sediment	BC1_bin.4	Nitrospirota	Sid_PvdS_regulator_Paeruginosa_PA2426_180620	PvdS	iron gene regulation
sediment	BC1_bin.5	Proteobacteria	FbpB-FutB-family-iron-permease	FbpB	iron aquisition iron transport
sediment	BC1_bin.5	Proteobacteria	ExbB-family	ExbB	iron aquisition siderophore transport potential
sediment	BC1_bin.5	Proteobacteria	ExbD-family	ExbD	iron aquisition siderophore transport potential
sediment	BC1_bin.6	Proteobacteria	ExbD-family	ExbD	iron aquisition siderophore transport potential
sediment	BC1_bin.6	Proteobacteria	TonB-family	TonB	iron aquisition siderophore transport potential
sediment	BC1_bin.6	Proteobacteria	Sid_PvdS_regulator_Paeruginosa_PA2426_180620	PvdS	iron gene regulation
sediment	BC1_bin.6	Proteobacteria	PF04773_FecR	FecR	iron gene regulation
sediment	BC1_bin.6	Proteobacteria	PF04773_FecR	FecR	iron gene regulation
sediment	BC1_bin.7	Chloroflexota	Sid_PvdS_regulator_Paeruginosa_PA2426_180620	PvdS	iron gene regulation
sediment	BC1_bin.7	Chloroflexota	Sid_PvdS_regulator_Paeruginosa_PA2426_180620	PvdS	iron gene regulation
sediment	BC1_bin.7	Chloroflexota	Sid_PvdS_regulator_Paeruginosa_PA2426_180620	PvdS	iron gene regulation
sediment	BC1_bin.7	Chloroflexota	Sid_PvdS_regulator_Paeruginosa_PA2426_180620	PvdS	iron gene regulation
sediment	BC1_bin.8	Proteobacteria	FbpB-family-iron-permease	FbpB	iron aquisition iron transport
sediment	BC1_bin.8	Proteobacteria	FbpB-family-iron-permease	FbpB	iron aquisition iron transport
sediment	BC1_bin.8	Proteobacteria	FbpB-FutB-family-iron-permease	FbpB	iron aquisition iron transport
sediment	BC1_bin.8	Proteobacteria	ExbD-family	ExbD	iron aquisition siderophore transport potential
sediment	BC1_bin.8	Proteobacteria	ExbB-family	ExbB	iron aquisition siderophore transport potential
sediment	BC1_bin.8	Proteobacteria	PF04773_FecR	FecR	iron gene regulation
sediment	BC1_bin.9	Proteobacteria	ExbB-family	ExbB	iron aquisition siderophore transport potential
sediment	BC1_bin.9	Proteobacteria	ExbD-family	ExbD	iron aquisition siderophore transport potential
sediment	BC1_bin.9	Proteobacteria	ExbB-family	ExbB	iron aquisition siderophore transport potential
sediment	BC1_bin.9	Proteobacteria	ExbD-family	ExbD	iron aquisition siderophore transport potential
sediment	BC1_bin.9	Proteobacteria	ExbD-family	ExbD	iron aquisition siderophore transport potential
sediment	BC1_bin.9	Proteobacteria	Sid_PvdS_regulator_Paeruginosa_PA2426_180620	PvdS	iron gene regulation
sediment	BC1_bin.9	Proteobacteria	PF04773_FecR	FecR	iron gene regulation
sediment	BC11_bin.1	Proteobacteria	PF04773_FecR	FecR	iron gene regulation
sediment	BC11_bin.1	Proteobacteria	PF04773_FecR	FecR	iron gene regulation
sediment	BC11_bin.1	Proteobacteria	FbpB-FutB-family-iron-permease	FbpB	iron aquisition iron transport
sediment	BC11_bin.2	Proteobacteria	TonB-family	TonB	iron aquisition siderophore transport potential
sediment	BC11_bin.2	Proteobacteria	ExbD-family	ExbD	iron aquisition siderophore transport potential
sediment	BC11_bin.2	Proteobacteria	ExbB-family	ExbB	iron aquisition siderophore transport potential
sediment	BC11_bin.3	Chloroflexota	Sid_PvdS_regulator_Paeruginosa_PA2426_180620	PvdS	iron gene regulation
sediment	BC11_bin.3	Chloroflexota	Sid_PvdS_regulator_Paeruginosa_PA2426_180620	PvdS	iron gene regulation
sediment	BC11_bin.3	Chloroflexota	Sid_PvdS_regulator_Paeruginosa_PA2426_180620	PvdS	iron gene regulation
sediment	BC11_bin.3	Chloroflexota	Sid_PvdS_regulator_Paeruginosa_PA2426_180620	PvdS	iron gene regulation
sediment	BC11_bin.4	Methylomirabilota	ExbD-family	ExbD	iron aquisition siderophore transport potential
sediment	BC11_bin.4	Methylomirabilota	ExbB-family	ExbB	iron aquisition siderophore transport potential
sediment	BC11_bin.4	Methylomirabilota	Sid_PvdS_regulator_Paeruginosa_PA2426_180620	PvdS	iron gene regulation
sediment	BC2_bin.1	Nitrospirota	FbpB-FutB-family-iron-permease	FbpB	iron aquisition iron transport
sediment	BC2_bin.1	Nitrospirota	Sid_PvdS_regulator_Paeruginosa_PA2426_180620	PvdS	iron gene regulation
sediment	BC2_bin.2	Proteobacteria	ExbD-family	ExbD	iron aquisition siderophore transport potential
sediment	BC2_bin.2	Proteobacteria	ExbB-family	ExbB	iron aquisition siderophore transport potential
sediment	BC2_bin.2	Proteobacteria	TonB-family	TonB	iron aquisition siderophore transport potential
sediment	BC2_bin.2	Proteobacteria	PF04773_FecR	FecR	iron gene regulation
sediment	BC2_bin.2	Proteobacteria	ExbB-family	ExbB	iron aquisition siderophore transport potential
sediment	BC2_bin.2	Proteobacteria	ExbD-family	ExbD	iron aquisition siderophore transport potential
sediment	BC2_bin.2	Proteobacteria	TonB-family	TonB	iron aquisition siderophore transport potential
sediment	BC2_bin.2	Proteobacteria	ExbB-family	ExbB	iron aquisition siderophore transport potential
sediment	BC2_bin.2	Proteobacteria	ExbD-family	ExbD	iron aquisition siderophore transport potential
sediment	BC2_bin.2	Proteobacteria	TonB-family	TonB	iron aquisition siderophore transport potential
sediment	BC2_bin.2	Proteobacteria	Sid_PvdS_regulator_Paeruginosa_PA2426_180620	PvdS	iron gene regulation
sediment	BC2_bin.2	Proteobacteria	PF04773_FecR	FecR	iron gene regulation
sediment	BC2_bin.2	Proteobacteria	PF04773_FecR	FecR	iron gene regulation
sediment	BC2_bin.3	Proteobacteria	FbpB-FutB-family-iron-permease	FbpB	iron aquisition iron transport
sediment	BC2_bin.4	Gemmatimonadota	Sid_PvdS_regulator_Paeruginosa_PA2426_180620	PvdS	iron gene regulation
sediment	BC2_bin.4	Gemmatimonadota	Sid_PvdS_regulator_Paeruginosa_PA2426_180620	PvdS	iron gene regulation
sediment	BC2_bin.4	Gemmatimonadota	Sid_PvdS_regulator_Paeruginosa_PA2426_180620	PvdS	iron gene regulation
sediment	BC2_bin.4	Gemmatimonadota	Sid_PvdS_regulator_Paeruginosa_PA2426_180620	PvdS	iron gene regulation
sediment	BC2_bin.5	Desulfobacterota_B	ExbB-family	ExbB	iron aquisition siderophore transport potential
sediment	BC2_bin.5	Desulfobacterota_B	ExbD-family	ExbD	iron aquisition siderophore transport potential
sediment	BC2_bin.5	Desulfobacterota_B	TonB-family	TonB	iron aquisition siderophore transport potential
sediment	BC2_bin.5	Desulfobacterota_B	TonB-family	TonB	iron aquisition siderophore transport potential
sediment	BC2_bin.5	Desulfobacterota_B	ExbD-family	ExbD	iron aquisition siderophore transport potential
sediment	BC2_bin.5	Desulfobacterota_B	ExbB-family	ExbB	iron aquisition siderophore transport potential
sediment	BC2_bin.5	Desulfobacterota_B	ExbD-family	ExbD	iron aquisition siderophore transport potential
sediment	BC2_bin.5	Desulfobacterota_B	Sid_PvdS_regulator_Paeruginosa_PA2426_180620	PvdS	iron gene regulation
sediment	BC2_bin.5	Desulfobacterota_B	Sid_PvdS_regulator_Paeruginosa_PA2426_180620	PvdS	iron gene regulation
sediment	BC2_bin.5	Desulfobacterota_B	Sid_PvdS_regulator_Paeruginosa_PA2426_180620	PvdS	iron gene regulation
sediment	BC2_bin.6	Proteobacteria	FbpB-FutB-family-iron-permease	FbpB	iron aquisition iron transport
sediment	BC2_bin.6	Proteobacteria	FbpB-family-iron-permease	FbpB	iron aquisition iron transport
sediment	BC2_bin.6	Proteobacteria	FbpB-FutB-family-iron-permease	FbpB	iron aquisition iron transport
sediment	BC2_bin.6	Proteobacteria	ExbD-family	ExbD	iron aquisition siderophore transport potential
sediment	BC2_bin.6	Proteobacteria	ExbB-family	ExbB	iron aquisition siderophore transport potential
sediment	BC2_bin.6	Proteobacteria	PF04773_FecR	FecR	iron gene regulation
sediment	BC5_bin.1	Proteobacteria	FbpB-FutB-family-iron-permease	FbpB	iron aquisition iron transport
sediment	BC5_bin.1	Proteobacteria	FbpB-family-iron-permease	FbpB	iron aquisition iron transport
sediment	BC5_bin.1	Proteobacteria	ExbB-family	ExbB	iron aquisition siderophore transport potential
sediment	BC5_bin.1	Proteobacteria	ExbD-family	ExbD	iron aquisition siderophore transport potential
sediment	BC5_bin.10	Proteobacteria	Sid_PvdS_regulator_Paeruginosa_PA2426_180620	PvdS	iron gene regulation
sediment	BC5_bin.10	Proteobacteria	PF04773_FecR	FecR	iron gene regulation
sediment	BC5_bin.10	Proteobacteria	PF04773_FecR	FecR	iron gene regulation
sediment	BC5_bin.11	Nitrospirota	FbpB-FutB-family-iron-permease	FbpB	iron aquisition iron transport
sediment	BC5_bin.12	Nitrospinota	ExbD-family	ExbD	iron aquisition siderophore transport potential
sediment	BC5_bin.12	Nitrospinota	TonB-family	TonB	iron aquisition siderophore transport potential
sediment	BC5_bin.12	Nitrospinota	ExbD-family	ExbD	iron aquisition siderophore transport potential
sediment	BC5_bin.12	Nitrospinota	ExbB-family	ExbB	iron aquisition siderophore transport potential
sediment	BC5_bin.12	Nitrospinota	Sid_PvdS_regulator_Paeruginosa_PA2426_180620	PvdS	iron gene regulation
sediment	BC5_bin.2	Proteobacteria	FbpB-FutB-family-iron-permease	FbpB	iron aquisition iron transport
sediment	BC5_bin.2	Proteobacteria	PF04773_FecR	FecR	iron gene regulation
sediment	BC5_bin.3	KSB1	ExbD-family	ExbD	iron aquisition siderophore transport potential
sediment	BC5_bin.3	KSB1	ExbB-family	ExbB	iron aquisition siderophore transport potential
sediment	BC5_bin.3	KSB1	ExbD-family	ExbD	iron aquisition siderophore transport potential
sediment	BC5_bin.3	KSB1	ExbB-family	ExbB	iron aquisition siderophore transport potential
sediment	BC5_bin.3	KSB1	Sid_PvdS_regulator_Paeruginosa_PA2426_180620	PvdS	iron gene regulation
sediment	BC5_bin.3	KSB1	PF04773_FecR	FecR	iron gene regulation
sediment	BC5_bin.4	Proteobacteria	ExbD-family	ExbD	iron aquisition siderophore transport potential
sediment	BC5_bin.4	Proteobacteria	ExbB-family	ExbB	iron aquisition siderophore transport potential
sediment	BC5_bin.4	Proteobacteria	TonB-family	TonB	iron aquisition siderophore transport potential
sediment	BC5_bin.4	Proteobacteria	ExbB-family	ExbB	iron aquisition siderophore transport potential
sediment	BC5_bin.4	Proteobacteria	ExbD-family	ExbD	iron aquisition siderophore transport potential
sediment	BC5_bin.4	Proteobacteria	ExbD-family	ExbD	iron aquisition siderophore transport potential
sediment	BC5_bin.4	Proteobacteria	Sid_PvdS_regulator_Paeruginosa_PA2426_180620	PvdS	iron gene regulation
sediment	BC5_bin.4	Proteobacteria	PF04773_FecR	FecR	iron gene regulation
sediment	BC5_bin.5	Chloroflexota	Sid_PvdS_regulator_Paeruginosa_PA2426_180620	PvdS	iron gene regulation
sediment	BC5_bin.5	Chloroflexota	Sid_PvdS_regulator_Paeruginosa_PA2426_180620	PvdS	iron gene regulation
sediment	BC5_bin.5	Chloroflexota	Sid_PvdS_regulator_Paeruginosa_PA2426_180620	PvdS	iron gene regulation
sediment	BC5_bin.6	Proteobacteria	ExbD-family	ExbD	iron aquisition siderophore transport potential
sediment	BC5_bin.6	Proteobacteria	ExbB-family	ExbB	iron aquisition siderophore transport potential
sediment	BC5_bin.6	Proteobacteria	PF04773_FecR	FecR	iron gene regulation
sediment	BC5_bin.6	Proteobacteria	TonB-family	TonB	iron aquisition siderophore transport potential
sediment	BC5_bin.6	Proteobacteria	ExbD-family	ExbD	iron aquisition siderophore transport potential
sediment	BC5_bin.6	Proteobacteria	ExbB-family	ExbB	iron aquisition siderophore transport potential
sediment	BC5_bin.6	Proteobacteria	ExbB-family	ExbB	iron aquisition siderophore transport potential
sediment	BC5_bin.6	Proteobacteria	ExbB-family	ExbB	iron aquisition siderophore transport potential
sediment	BC5_bin.6	Proteobacteria	ExbD-family	ExbD	iron aquisition siderophore transport potential
sediment	BC5_bin.6	Proteobacteria	TonB-family	TonB	iron aquisition siderophore transport potential
sediment	BC5_bin.6	Proteobacteria	Sid_PvdS_regulator_Paeruginosa_PA2426_180620	PvdS	iron gene regulation
sediment	BC5_bin.6	Proteobacteria	PF04773_FecR	FecR	iron gene regulation
sediment	BC5_bin.7	Desulfobacterota_B	TonB-family	TonB	iron aquisition siderophore transport potential
sediment	BC5_bin.7	Desulfobacterota_B	ExbD-family	ExbD	iron aquisition siderophore transport potential
sediment	BC5_bin.7	Desulfobacterota_B	ExbB-family	ExbB	iron aquisition siderophore transport potential
sediment	BC5_bin.7	Desulfobacterota_B	ExbD-family	ExbD	iron aquisition siderophore transport potential
sediment	BC5_bin.7	Desulfobacterota_B	Sid_PvdS_regulator_Paeruginosa_PA2426_180620	PvdS	iron gene regulation
sediment	BC5_bin.7	Desulfobacterota_B	Sid_PvdS_regulator_Paeruginosa_PA2426_180620	PvdS	iron gene regulation
sediment	BC5_bin.7	Desulfobacterota_B	FbpB-FutB-family-iron-permease	FbpB	iron aquisition iron transport
sediment	BC5_bin.8	Nitrospirota	ExbB-family	ExbB	iron aquisition siderophore transport potential
sediment	BC5_bin.8	Nitrospirota	ExbD-family	ExbD	iron aquisition siderophore transport potential
sediment	BC5_bin.8	Nitrospirota	ExbD-family	ExbD	iron aquisition siderophore transport potential
sediment	BC5_bin.8	Nitrospirota	ExbD-family	ExbD	iron aquisition siderophore transport potential
sediment	BC5_bin.8	Nitrospirota	ExbB-family	ExbB	iron aquisition siderophore transport potential
sediment	BC5_bin.8	Nitrospirota	ExbB-family	ExbB	iron aquisition siderophore transport potential
sediment	BC5_bin.8	Nitrospirota	ExbD-family	ExbD	iron aquisition siderophore transport potential
sediment	BC5_bin.8	Nitrospirota	Sid_PvdS_regulator_Paeruginosa_PA2426_180620	PvdS	iron gene regulation
sediment	BC5_bin.8	Nitrospirota	Sid_PvdS_regulator_Paeruginosa_PA2426_180620	PvdS	iron gene regulation
sediment	BC8_bin.1	Actinobacteriota	FbpB-FutB-family-iron-permease	FbpB	iron aquisition iron transport
sediment	BC8_bin.10	Desulfobacterota_B	FbpB-family-iron-permease	FbpB	iron aquisition iron transport
sediment	BC8_bin.10	Desulfobacterota_B	ExbD-family	ExbD	iron aquisition siderophore transport potential
sediment	BC8_bin.10	Desulfobacterota_B	TonB-family	TonB	iron aquisition siderophore transport potential
sediment	BC8_bin.10	Desulfobacterota_B	ExbB-family	ExbB	iron aquisition siderophore transport potential
sediment	BC8_bin.10	Desulfobacterota_B	ExbD-family	ExbD	iron aquisition siderophore transport potential
sediment	BC8_bin.10	Desulfobacterota_B	TonB-family	TonB	iron aquisition siderophore transport potential
sediment	BC8_bin.10	Desulfobacterota_B	ExbB-family	ExbB	iron aquisition siderophore transport potential
sediment	BC8_bin.10	Desulfobacterota_B	ExbD-family	ExbD	iron aquisition siderophore transport potential
sediment	BC8_bin.10	Desulfobacterota_B	FbpB-FutB-family-iron-permease	FbpB	iron aquisition iron transport
sediment	BC8_bin.10	Desulfobacterota_B	Sid_PvdS_regulator_Paeruginosa_PA2426_180620	PvdS	iron gene regulation
sediment	BC8_bin.10	Desulfobacterota_B	Sid_PvdS_regulator_Paeruginosa_PA2426_180620	PvdS	iron gene regulation
sediment	BC8_bin.10	Desulfobacterota_B	PF04773_FecR	FecR	iron gene regulation
sediment	BC8_bin.11	Proteobacteria	FbpB-family-iron-permease	FbpB	iron aquisition iron transport
sediment	BC8_bin.11	Proteobacteria	FbpB-family-iron-permease	FbpB	iron aquisition iron transport
sediment	BC8_bin.11	Proteobacteria	ExbB-family	ExbB	iron aquisition siderophore transport potential
sediment	BC8_bin.11	Proteobacteria	ExbD-family	ExbD	iron aquisition siderophore transport potential
sediment	BC8_bin.11	Proteobacteria	PF04773_FecR	FecR	iron gene regulation
sediment	BC8_bin.13	Nitrospinota	ExbB-family	ExbB	iron aquisition siderophore transport potential
sediment	BC8_bin.13	Nitrospinota	ExbB-family	ExbB	iron aquisition siderophore transport potential
sediment	BC8_bin.13	Nitrospinota	ExbD-family	ExbD	iron aquisition siderophore transport potential
sediment	BC8_bin.15	JACPSX01	FbpB-FutB-family-iron-permease	FbpB	iron aquisition iron transport
sediment	BC8_bin.15	JACPSX01	ExbB-family	ExbB	iron aquisition siderophore transport potential
sediment	BC8_bin.15	JACPSX01	ExbD-family	ExbD	iron aquisition siderophore transport potential
sediment	BC8_bin.15	JACPSX01	Sid_PvdS_regulator_Paeruginosa_PA2426_180620	PvdS	iron gene regulation
sediment	BC8_bin.2	Methylomirabilota	FbpB-FutB-family-iron-permease	FbpB	iron aquisition iron transport
sediment	BC8_bin.2	Methylomirabilota	TonB-family	TonB	iron aquisition siderophore transport potential
sediment	BC8_bin.2	Methylomirabilota	Sid_PvdS_regulator_Paeruginosa_PA2426_180620	PvdS	iron gene regulation
sediment	BC8_bin.2	Methylomirabilota	TonB-family	TonB	iron aquisition siderophore transport potential
sediment	BC8_bin.2	Methylomirabilota	ExbD-family	ExbD	iron aquisition siderophore transport potential
sediment	BC8_bin.2	Methylomirabilota	ExbB-family	ExbB	iron aquisition siderophore transport potential
sediment	BC8_bin.2	Methylomirabilota	Sid_PvdS_regulator_Paeruginosa_PA2426_180620	PvdS	iron gene regulation
sediment	BC8_bin.2	Methylomirabilota	Sid_PvdS_regulator_Paeruginosa_PA2426_180620	PvdS	iron gene regulation
sediment	BC8_bin.3	Proteobacteria	TonB-family	TonB	iron aquisition siderophore transport potential
sediment	BC8_bin.4	Methylomirabilota	TonB-family	TonB	iron aquisition siderophore transport potential
sediment	BC8_bin.4	Methylomirabilota	ExbB-family	ExbB	iron aquisition siderophore transport potential
sediment	BC8_bin.4	Methylomirabilota	ExbD-family	ExbD	iron aquisition siderophore transport potential
sediment	BC8_bin.4	Methylomirabilota	TonB-family	TonB	iron aquisition siderophore transport potential
sediment	BC8_bin.4	Methylomirabilota	Sid_PvdS_regulator_Paeruginosa_PA2426_180620	PvdS	iron gene regulation
sediment	BC8_bin.5	Nitrospirota	FbpB-FutB-family-iron-permease	FbpB	iron aquisition iron transport
sediment	BC8_bin.5	Nitrospirota	Sid_PvdS_regulator_Paeruginosa_PA2426_180620	PvdS	iron gene regulation
sediment	BC8_bin.6	Proteobacteria	PF04773_FecR	FecR	iron gene regulation
sediment	BC8_bin.7	Proteobacteria	ExbD-family	ExbD	iron aquisition siderophore transport potential
sediment	BC8_bin.7	Proteobacteria	ExbB-family	ExbB	iron aquisition siderophore transport potential
sediment	BC8_bin.7	Proteobacteria	Sid_PvdS_regulator_Paeruginosa_PA2426_180620	PvdS	iron gene regulation
sediment	BC8_bin.7	Proteobacteria	PF04773_FecR	FecR	iron gene regulation
sediment	BC8_bin.8	Acidobacteriota	ExbD-family	ExbD	iron aquisition siderophore transport potential
sediment	BC8_bin.8	Acidobacteriota	ExbD-family	ExbD	iron aquisition siderophore transport potential
sediment	BC8_bin.8	Acidobacteriota	ExbB-family	ExbB	iron aquisition siderophore transport potential
sediment	BC8_bin.8	Acidobacteriota	Sid_PvdS_regulator_Paeruginosa_PA2426_180620	PvdS	iron gene regulation
sediment	BC8_bin.8	Acidobacteriota	Sid_PvdS_regulator_Paeruginosa_PA2426_180620	PvdS	iron gene regulation
sediment	BC8_bin.8	Acidobacteriota	Sid_PvdS_regulator_Paeruginosa_PA2426_180620	PvdS	iron gene regulation
sediment	BC8_bin.8	Acidobacteriota	PF04773_FecR	FecR	iron gene regulation
sediment	BC8_bin.9	Proteobacteria	FbpB-FutB-family-iron-permease	FbpB	iron aquisition iron transport
sediment	BC8_bin.9	Proteobacteria	FbpB-family-iron-permease	FbpB	iron aquisition iron transport
sediment	BC8_bin.9	Proteobacteria	FbpB-family-iron-permease	FbpB	iron aquisition iron transport
sediment	BC8_bin.9	Proteobacteria	ExbD-family	ExbD	iron aquisition siderophore transport potential
sediment	BC8_bin.9	Proteobacteria	ExbB-family	ExbB	iron aquisition siderophore transport potential
sediment	BC9_bin.1	Proteobacteria	PF04773_FecR	FecR	iron gene regulation
sediment	BC9_bin.1	Proteobacteria	ExbB-family	ExbB	iron aquisition siderophore transport potential
sediment	BC9_bin.1	Proteobacteria	ExbD-family	ExbD	iron aquisition siderophore transport potential
sediment	BC9_bin.1	Proteobacteria	PF04773_FecR	FecR	iron gene regulation
sediment	BC9_bin.2	Proteobacteria	ExbD-family	ExbD	iron aquisition siderophore transport potential
sediment	BC9_bin.2	Proteobacteria	ExbB-family	ExbB	iron aquisition siderophore transport potential
sediment	BC9_bin.2	Proteobacteria	Sid_PvdS_regulator_Paeruginosa_PA2426_180620	PvdS	iron gene regulation
sediment	BC9_bin.2	Proteobacteria	PF04773_FecR	FecR	iron gene regulation
sediment	BC9_bin.2	Proteobacteria	PF04773_FecR	FecR	iron gene regulation
sediment	BC9_bin.2	Proteobacteria	FbpB-FutB-family-iron-permease	FbpB	iron aquisition iron transport
sediment	BC9_bin.3	Actinobacteriota	Sid_PvdS_regulator_Paeruginosa_PA2426_180620	PvdS	iron gene regulation
sediment	BC9_bin.3	Actinobacteriota	PF04773_FecR	FecR	iron gene regulation
sediment	BC9_bin.3	Actinobacteriota	FbpB-FutB-family-iron-permease	FbpB	iron aquisition iron transport
sediment	BC9_bin.4	Proteobacteria	FbpB-family-iron-permease	FbpB	iron aquisition iron transport
sediment	BC9_bin.5	Desulfobacterota_B	ExbB-family	ExbB	iron aquisition siderophore transport potential
sediment	BC9_bin.5	Desulfobacterota_B	ExbD-family	ExbD	iron aquisition siderophore transport potential
sediment	BC9_bin.6	Chloroflexota	Sid_PvdS_regulator_Paeruginosa_PA2426_180620	PvdS	iron gene regulation
sediment	BC9_bin.6	Chloroflexota	Sid_PvdS_regulator_Paeruginosa_PA2426_180620	PvdS	iron gene regulation
nodule	9CJW_63	Myxococcota_A	TonB-family	TonB	iron aquisition siderophore transport potential
nodule	9CJW_63	Myxococcota_A	TonB-family	TonB	iron aquisition siderophore transport potential
nodule	9CJW_63	Myxococcota_A	ExbD-family	ExbD	iron aquisition siderophore transport potential
nodule	9CJW_63	Myxococcota_A	ExbB-family	ExbB	iron aquisition siderophore transport potential
nodule	9CJW_63	Myxococcota_A	TonB-family	TonB	iron aquisition siderophore transport potential
nodule	9CJW_63	Myxococcota_A	ExbB-family	ExbB	iron aquisition siderophore transport potential
nodule	9CJW_63	Myxococcota_A	ExbD-family	ExbD	iron aquisition siderophore transport potential
nodule	9CJW_63	Myxococcota_A	ExbB-family	ExbB	iron aquisition siderophore transport potential
nodule	9CJW_63	Myxococcota_A	ExbB-family	ExbB	iron aquisition siderophore transport potential
nodule	9CJW_63	Myxococcota_A	TonB-family	TonB	iron aquisition siderophore transport potential
nodule	9CJW_63	Myxococcota_A	Sid_PvdS_regulator_Paeruginosa_PA2426_180620	PvdS	iron gene regulation
nodule	9CJW_63	Myxococcota_A	Sid_PvdS_regulator_Paeruginosa_PA2426_180620	PvdS	iron gene regulation
nodule	9CJW_63	Myxococcota_A	Sid_PvdS_regulator_Paeruginosa_PA2426_180620	PvdS	iron gene regulation
nodule	9CJW_63	Myxococcota_A	Sid_PvdS_regulator_Paeruginosa_PA2426_180620	PvdS	iron gene regulation
nodule	9CJW_63	Myxococcota_A	PF04773_FecR	FecR	iron gene regulation
nodule	9CJW_35	Chloroflexota	Sid_PvdS_regulator_Paeruginosa_PA2426_180620	PvdS	iron gene regulation
nodule	9CJW_35	Chloroflexota	Sid_PvdS_regulator_Paeruginosa_PA2426_180620	PvdS	iron gene regulation
nodule	9CJW_35	Chloroflexota	Sid_PvdS_regulator_Paeruginosa_PA2426_180620	PvdS	iron gene regulation
nodule	9CJW_35	Chloroflexota	Sid_PvdS_regulator_Paeruginosa_PA2426_180620	PvdS	iron gene regulation
nodule	9CJW_35	Chloroflexota	Sid_PvdS_regulator_Paeruginosa_PA2426_180620	PvdS	iron gene regulation
nodule	ROV5_34	Proteobacteria	ExbB-family	ExbB	iron aquisition siderophore transport potential
nodule	ROV5_34	Proteobacteria	ExbD-family	ExbD	iron aquisition siderophore transport potential
nodule	ROV5_34	Proteobacteria	TonB-family	TonB	iron aquisition siderophore transport potential
nodule	ROV5_34	Proteobacteria	ExbB-family	ExbB	iron aquisition siderophore transport potential
nodule	ROV5_34	Proteobacteria	ExbD-family	ExbD	iron aquisition siderophore transport potential
nodule	ROV5_34	Proteobacteria	ExbD-family	ExbD	iron aquisition siderophore transport potential
nodule	ROV5_34	Proteobacteria	TonB-family	TonB	iron aquisition siderophore transport potential
nodule	ROV5_34	Proteobacteria	ExbB-family	ExbB	iron aquisition siderophore transport potential
nodule	ROV5_34	Proteobacteria	ExbD-family	ExbD	iron aquisition siderophore transport potential
nodule	ROV5_34	Proteobacteria	TonB-family	TonB	iron aquisition siderophore transport potential
nodule	ROV5_34	Proteobacteria	ExbB-family	ExbB	iron aquisition siderophore transport potential
nodule	ROV5_34	Proteobacteria	ExbD-family	ExbD	iron aquisition siderophore transport potential
nodule	ROV5_34	Proteobacteria	ExbD-family	ExbD	iron aquisition siderophore transport potential
nodule	ROV5_34	Proteobacteria	Sid_PvdS_regulator_Paeruginosa_PA2426_180620	PvdS	iron gene regulation
nodule	ROV5_34	Proteobacteria	PF04773_FecR	FecR	iron gene regulation
nodule	9CJW_81	Proteobacteria	FbpB-family-iron-permease	FbpB	iron aquisition iron transport
nodule	9CJW_81	Proteobacteria	FbpB-FutB-family-iron-permease	FbpB	iron aquisition iron transport
nodule	9CJW_81	Proteobacteria	Sid_PvdS_regulator_Paeruginosa_PA2426_180620	PvdS	iron gene regulation
nodule	ROV5_59	Proteobacteria	FbpB-family-iron-permease	FbpB	iron aquisition iron transport
nodule	ROV5_59	Proteobacteria	ExbD-family	ExbD	iron aquisition siderophore transport potential
nodule	ROV5_59	Proteobacteria	ExbB-family	ExbB	iron aquisition siderophore transport potential
nodule	ROV5_59	Proteobacteria	Sid_PvdS_regulator_Paeruginosa_PA2426_180620	PvdS	iron gene regulation
nodule	9CJW_59	Chloroflexota	FbpB-family-iron-permease	FbpB	iron aquisition iron transport
nodule	9CJW_59	Chloroflexota	FbpB-FutB-family-iron-permease	FbpB	iron aquisition iron transport
nodule	9CJW_59	Chloroflexota	Sid_PvdS_regulator_Paeruginosa_PA2426_180620	PvdS	iron gene regulation
nodule	9CJW_59	Chloroflexota	Sid_PvdS_regulator_Paeruginosa_PA2426_180620	PvdS	iron gene regulation
nodule	ROV5_77	Proteobacteria	ExbB-family	ExbB	iron aquisition siderophore transport potential
nodule	ROV5_77	Proteobacteria	ExbD-family	ExbD	iron aquisition siderophore transport potential
nodule	ROV5_77	Proteobacteria	ExbB-family	ExbB	iron aquisition siderophore transport potential
nodule	ROV5_77	Proteobacteria	ExbD-family	ExbD	iron aquisition siderophore transport potential
nodule	ROV5_77	Proteobacteria	ExbD-family	ExbD	iron aquisition siderophore transport potential
nodule	ROV5_77	Proteobacteria	Sid_PvdS_regulator_Paeruginosa_PA2426_180620	PvdS	iron gene regulation
nodule	9CJW_6	Proteobacteria	FbpB-FutB-family-iron-permease	FbpB	iron aquisition iron transport
nodule	9CJW_6	Proteobacteria	ExbB-family	ExbB	iron aquisition siderophore transport potential
nodule	9CJW_6	Proteobacteria	Sid_PvdS_regulator_Paeruginosa_PA2426_180620	PvdS	iron gene regulation
nodule	9CJW_6	Proteobacteria	Sid_PvdS_regulator_Paeruginosa_PA2426_180620	PvdS	iron gene regulation
nodule	9CJW_61	Myxococcota_A	ExbB-family	ExbB	iron aquisition siderophore transport potential
nodule	9CJW_61	Myxococcota_A	ExbD-family	ExbD	iron aquisition siderophore transport potential
nodule	9CJW_61	Myxococcota_A	TonB-family	TonB	iron aquisition siderophore transport potential
nodule	9CJW_61	Myxococcota_A	Sid_PvdS_regulator_Paeruginosa_PA2426_180620	PvdS	iron gene regulation
nodule	9CJW_61	Myxococcota_A	Sid_PvdS_regulator_Paeruginosa_PA2426_180620	PvdS	iron gene regulation
nodule	9CJW_61	Myxococcota_A	Sid_PvdS_regulator_Paeruginosa_PA2426_180620	PvdS	iron gene regulation
nodule	9CJW_61	Myxococcota_A	Sid_PvdS_regulator_Paeruginosa_PA2426_180620	PvdS	iron gene regulation
nodule	ROV5_85	KSB1	ExbB-family	ExbB	iron aquisition siderophore transport potential
nodule	ROV5_85	KSB1	ExbD-family	ExbD	iron aquisition siderophore transport potential
nodule	ROV5_85	KSB1	ExbB-family	ExbB	iron aquisition siderophore transport potential
nodule	ROV5_85	KSB1	ExbD-family	ExbD	iron aquisition siderophore transport potential
nodule	ROV5_85	KSB1	ExbB-family	ExbB	iron aquisition siderophore transport potential
nodule	ROV5_85	KSB1	ExbD-family	ExbD	iron aquisition siderophore transport potential
nodule	ROV5_85	KSB1	Sid_PvdS_regulator_Paeruginosa_PA2426_180620	PvdS	iron gene regulation
nodule	ROV5_85	KSB1	Sid_PvdS_regulator_Paeruginosa_PA2426_180620	PvdS	iron gene regulation
nodule	ROV5_85	KSB1	Sid_PvdS_regulator_Paeruginosa_PA2426_180620	PvdS	iron gene regulation
nodule	ROV5_85	KSB1	Sid_PvdS_regulator_Paeruginosa_PA2426_180620	PvdS	iron gene regulation
nodule	ROV5_85	KSB1	Sid_PvdS_regulator_Paeruginosa_PA2426_180620	PvdS	iron gene regulation
nodule	ROV5_85	KSB1	Sid_PvdS_regulator_Paeruginosa_PA2426_180620	PvdS	iron gene regulation
nodule	ROV5_85	KSB1	PF04773_FecR	FecR	iron gene regulation
nodule	9CJW_73	Methylomirabilota	ExbB-family	ExbB	iron aquisition siderophore transport potential
nodule	9CJW_73	Methylomirabilota	ExbD-family	ExbD	iron aquisition siderophore transport potential
nodule	9CJW_73	Methylomirabilota	TonB-family	TonB	iron aquisition siderophore transport potential
nodule	9CJW_73	Methylomirabilota	Sid_PvdS_regulator_Paeruginosa_PA2426_180620	PvdS	iron gene regulation
nodule	9CJW_73	Methylomirabilota	Sid_PvdS_regulator_Paeruginosa_PA2426_180620	PvdS	iron gene regulation
nodule	9DJH_15	Proteobacteria	ExbD-family	ExbD	iron aquisition siderophore transport potential
nodule	9DJH_15	Proteobacteria	ExbB-family	ExbB	iron aquisition siderophore transport potential
nodule	9DJH_15	Proteobacteria	ExbB-family	ExbB	iron aquisition siderophore transport potential
nodule	9DJH_15	Proteobacteria	ExbD-family	ExbD	iron aquisition siderophore transport potential
nodule	9DJH_15	Proteobacteria	ExbD-family	ExbD	iron aquisition siderophore transport potential
nodule	9DJH_15	Proteobacteria	ExbB-family	ExbB	iron aquisition siderophore transport potential
nodule	9DJH_15	Proteobacteria	ExbD-family	ExbD	iron aquisition siderophore transport potential
nodule	9DJH_15	Proteobacteria	Sid_PvdS_regulator_Paeruginosa_PA2426_180620	PvdS	iron gene regulation
nodule	9DJH_15	Proteobacteria	PF04773_FecR	FecR	iron gene regulation
nodule	9DJH_15	Proteobacteria	PF04773_FecR	FecR	iron gene regulation
nodule	9DJH_15	Proteobacteria	PF04773_FecR	FecR	iron gene regulation
nodule	9DJH_15	Proteobacteria	PF04773_FecR	FecR	iron gene regulation
nodule	9DJH_15	Proteobacteria	FbpB-FutB-family-iron-permease	FbpB	iron aquisition iron transport
nodule	ROV5_37	Proteobacteria	FbpB-family-iron-permease	FbpB	iron aquisition iron transport
nodule	ROV5_37	Proteobacteria	ExbD-family	ExbD	iron aquisition siderophore transport potential
nodule	ROV5_37	Proteobacteria	ExbB-family	ExbB	iron aquisition siderophore transport potential
nodule	ROV5_37	Proteobacteria	Sid_PvdS_regulator_Paeruginosa_PA2426_180620	PvdS	iron gene regulation
nodule	ROV5_47	Gemmatimonadota	FbpB-family-iron-permease	FbpB	iron aquisition iron transport
nodule	ROV5_47	Gemmatimonadota	ExbB-family	ExbB	iron aquisition siderophore transport potential
nodule	ROV5_47	Gemmatimonadota	ExbD-family	ExbD	iron aquisition siderophore transport potential
nodule	ROV5_47	Gemmatimonadota	TonB-family	TonB	iron aquisition siderophore transport potential
nodule	ROV5_47	Gemmatimonadota	ExbB-family	ExbB	iron aquisition siderophore transport potential
nodule	ROV5_47	Gemmatimonadota	ExbD-family	ExbD	iron aquisition siderophore transport potential
nodule	ROV5_47	Gemmatimonadota	ExbD-family	ExbD	iron aquisition siderophore transport potential
nodule	ROV5_47	Gemmatimonadota	Sid_PvdS_regulator_Paeruginosa_PA2426_180620	PvdS	iron gene regulation
nodule	ROV5_47	Gemmatimonadota	Sid_PvdS_regulator_Paeruginosa_PA2426_180620	PvdS	iron gene regulation
nodule	ROV5_52	Acidobacteriota	Sid_PvdS_regulator_Paeruginosa_PA2426_180620	PvdS	iron gene regulation
nodule	ROV5_52	Acidobacteriota	Sid_PvdS_regulator_Paeruginosa_PA2426_180620	PvdS	iron gene regulation
nodule	ROV5_52	Acidobacteriota	Sid_PvdS_regulator_Paeruginosa_PA2426_180620	PvdS	iron gene regulation
nodule	ROV5_52	Acidobacteriota	Sid_PvdS_regulator_Paeruginosa_PA2426_180620	PvdS	iron gene regulation
nodule	9CJW_68	Actinobacteriota	Sid_PvdS_regulator_Paeruginosa_PA2426_180620	PvdS	iron gene regulation
nodule	9CJW_68	Actinobacteriota	FbpB-FutB-family-iron-permease	FbpB	iron aquisition iron transport
nodule	9CJW_68	Actinobacteriota	Sid_PvdS_regulator_Paeruginosa_PA2426_180620	PvdS	iron gene regulation
nodule	9CJW_68	Actinobacteriota	Sid_PvdS_regulator_Paeruginosa_PA2426_180620	PvdS	iron gene regulation
nodule	9CJW_68	Actinobacteriota	Sid_PvdS_regulator_Paeruginosa_PA2426_180620	PvdS	iron gene regulation
nodule	9CJW_33	KSB1	Sid_PvdS_regulator_Paeruginosa_PA2426_180620	PvdS	iron gene regulation
nodule	9CJW_33	KSB1	Sid_PvdS_regulator_Paeruginosa_PA2426_180620	PvdS	iron gene regulation
nodule	9CJW_33	KSB1	Sid_PvdS_regulator_Paeruginosa_PA2426_180620	PvdS	iron gene regulation
nodule	9CJW_33	KSB1	Sid_PvdS_regulator_Paeruginosa_PA2426_180620	PvdS	iron gene regulation
nodule	9CJW_33	KSB1	Sid_PvdS_regulator_Paeruginosa_PA2426_180620	PvdS	iron gene regulation
nodule	9CJW_33	KSB1	Sid_PvdS_regulator_Paeruginosa_PA2426_180620	PvdS	iron gene regulation
nodule	9CJW_33	KSB1	ExbB-family	ExbB	iron aquisition siderophore transport potential
nodule	9CJW_33	KSB1	ExbD-family	ExbD	iron aquisition siderophore transport potential
nodule	9CJW_33	KSB1	TonB-family	TonB	iron aquisition siderophore transport potential
nodule	9CJW_33	KSB1	ExbD-family	ExbD	iron aquisition siderophore transport potential
nodule	9CJW_33	KSB1	ExbB-family	ExbB	iron aquisition siderophore transport potential
nodule	9CJW_33	KSB1	Sid_PvdS_regulator_Paeruginosa_PA2426_180620	PvdS	iron gene regulation
nodule	9CJW_33	KSB1	TonB-family	TonB	iron aquisition siderophore transport potential
nodule	9CJW_33	KSB1	ExbD-family	ExbD	iron aquisition siderophore transport potential
nodule	9CJW_33	KSB1	ExbD-family	ExbD	iron aquisition siderophore transport potential
nodule	9CJW_33	KSB1	ExbB-family	ExbB	iron aquisition siderophore transport potential
nodule	9CJW_33	KSB1	ExbB-family	ExbB	iron aquisition siderophore transport potential
nodule	9CJW_33	KSB1	ExbD-family	ExbD	iron aquisition siderophore transport potential
nodule	9CJW_33	KSB1	ExbD-family	ExbD	iron aquisition siderophore transport potential
nodule	9CJW_33	KSB1	TonB-family	TonB	iron aquisition siderophore transport potential
nodule	9CJW_33	KSB1	Sid_PvdS_regulator_Paeruginosa_PA2426_180620	PvdS	iron gene regulation
nodule	9CJW_33	KSB1	TonB-family	TonB	iron aquisition siderophore transport potential
nodule	9CJW_33	KSB1	ExbD-family	ExbD	iron aquisition siderophore transport potential
nodule	9CJW_33	KSB1	ExbB-family	ExbB	iron aquisition siderophore transport potential
nodule	9CJW_33	KSB1	ExbD-family	ExbD	iron aquisition siderophore transport potential
nodule	9CJW_33	KSB1	ExbB-family	ExbB	iron aquisition siderophore transport potential
nodule	9CJW_33	KSB1	ExbD-family	ExbD	iron aquisition siderophore transport potential
nodule	9CJW_33	KSB1	Sid_PvdS_regulator_Paeruginosa_PA2426_180620	PvdS	iron gene regulation
nodule	9CJW_33	KSB1	Sid_PvdS_regulator_Paeruginosa_PA2426_180620	PvdS	iron gene regulation
nodule	9CJW_33	KSB1	Sid_PvdS_regulator_Paeruginosa_PA2426_180620	PvdS	iron gene regulation
nodule	9CJW_33	KSB1	Sid_PvdS_regulator_Paeruginosa_PA2426_180620	PvdS	iron gene regulation
nodule	9CJW_33	KSB1	Sid_PvdS_regulator_Paeruginosa_PA2426_180620	PvdS	iron gene regulation
nodule	9CJW_33	KSB1	PF04773_FecR	FecR	iron gene regulation
nodule	9CJW_33	KSB1	Sid_PvdS_regulator_Paeruginosa_PA2426_180620	PvdS	iron gene regulation
nodule	9CJW_33	KSB1	Sid_PvdS_regulator_Paeruginosa_PA2426_180620	PvdS	iron gene regulation
nodule	9CJW_33	KSB1	PF04773_FecR	FecR	iron gene regulation
nodule	9CJW_33	KSB1	PF04773_FecR	FecR	iron gene regulation
nodule	9CJW_33	KSB1	PF04773_FecR	FecR	iron gene regulation
nodule	9CJW_29	Proteobacteria	FbpB-FutB-family-iron-permease	FbpB	iron aquisition iron transport
nodule	9CJW_29	Proteobacteria	ExbD-family	ExbD	iron aquisition siderophore transport potential
nodule	9CJW_29	Proteobacteria	ExbB-family	ExbB	iron aquisition siderophore transport potential
nodule	9CJW_90	Proteobacteria	Sid_PvdS_regulator_Paeruginosa_PA2426_180620	PvdS	iron gene regulation
nodule	ROV5_62	Chloroflexota	Sid_PvdS_regulator_Paeruginosa_PA2426_180620	PvdS	iron gene regulation
nodule	ROV5_62	Chloroflexota	Sid_PvdS_regulator_Paeruginosa_PA2426_180620	PvdS	iron gene regulation
nodule	ROV5_62	Chloroflexota	PF04773_FecR	FecR	iron gene regulation
nodule	ROV5_1	Gemmatimonadota	ExbD-family	ExbD	iron aquisition siderophore transport potential
nodule	ROV5_1	Gemmatimonadota	TonB-family	TonB	iron aquisition siderophore transport potential
nodule	ROV5_1	Gemmatimonadota	Sid_PvdS_regulator_Paeruginosa_PA2426_180620	PvdS	iron gene regulation
nodule	ROV5_1	Gemmatimonadota	PF04773_FecR	FecR	iron gene regulation
nodule	ROV5_86	KSB1	TonB-family	TonB	iron aquisition siderophore transport potential
nodule	ROV5_86	KSB1	ExbD-family	ExbD	iron aquisition siderophore transport potential
nodule	ROV5_86	KSB1	ExbD-family	ExbD	iron aquisition siderophore transport potential
nodule	ROV5_86	KSB1	ExbD-family	ExbD	iron aquisition siderophore transport potential
nodule	ROV5_86	KSB1	ExbB-family	ExbB	iron aquisition siderophore transport potential
nodule	ROV5_86	KSB1	Sid_PvdS_regulator_Paeruginosa_PA2426_180620	PvdS	iron gene regulation
nodule	ROV5_86	KSB1	Sid_PvdS_regulator_Paeruginosa_PA2426_180620	PvdS	iron gene regulation
nodule	ROV5_86	KSB1	PF04773_FecR	FecR	iron gene regulation
nodule	9DJH_14	Proteobacteria	ExbB-family	ExbB	iron aquisition siderophore transport potential
nodule	9DJH_14	Proteobacteria	ExbD-family	ExbD	iron aquisition siderophore transport potential
nodule	ROV5_63	Nitrospinota	FbpB-family-iron-permease	FbpB	iron aquisition iron transport
nodule	ROV5_63	Nitrospinota	TonB-family	TonB	iron aquisition siderophore transport potential
nodule	ROV5_63	Nitrospinota	ExbD-family	ExbD	iron aquisition siderophore transport potential
nodule	ROV5_63	Nitrospinota	ExbB-family	ExbB	iron aquisition siderophore transport potential
nodule	ROV5_63	Nitrospinota	Sid_PvdS_regulator_Paeruginosa_PA2426_180620	PvdS	iron gene regulation
nodule	ROV5_63	Nitrospinota	Sid_PvdS_regulator_Paeruginosa_PA2426_180620	PvdS	iron gene regulation
nodule	ROV5_63	Nitrospinota	PF04773_FecR	FecR	iron gene regulation
nodule	9CJW_57	Proteobacteria	ExbD-family	ExbD	iron aquisition siderophore transport potential
nodule	9CJW_57	Proteobacteria	ExbB-family	ExbB	iron aquisition siderophore transport potential
nodule	9CJW_57	Proteobacteria	FbpB-FutB-family-iron-permease	FbpB	iron aquisition iron transport
nodule	9CJW_57	Proteobacteria	Sid_PvdS_regulator_Paeruginosa_PA2426_180620	PvdS	iron gene regulation
nodule	9CJW_57	Proteobacteria	PF04773_FecR	FecR	iron gene regulation
nodule	9CJW_57	Proteobacteria	TonB-family	TonB	iron aquisition siderophore transport potential
nodule	9CJW_57	Proteobacteria	ExbB-family	ExbB	iron aquisition siderophore transport potential
nodule	9CJW_57	Proteobacteria	ExbB-family	ExbB	iron aquisition siderophore transport potential
nodule	9CJW_57	Proteobacteria	ExbD-family	ExbD	iron aquisition siderophore transport potential
nodule	9CJW_57	Proteobacteria	ExbD-family	ExbD	iron aquisition siderophore transport potential
nodule	9CJW_57	Proteobacteria	TonB-family	TonB	iron aquisition siderophore transport potential
nodule	9CJW_57	Proteobacteria	ExbB-family	ExbB	iron aquisition siderophore transport potential
nodule	9CJW_57	Proteobacteria	ExbD-family	ExbD	iron aquisition siderophore transport potential
nodule	9CJW_57	Proteobacteria	TonB-family	TonB	iron aquisition siderophore transport potential
nodule	9CJW_57	Proteobacteria	PF04773_FecR	FecR	iron gene regulation
nodule	ROV5_20	Proteobacteria	TonB-family	TonB	iron aquisition siderophore transport potential
nodule	ROV5_20	Proteobacteria	TonB-family	TonB	iron aquisition siderophore transport potential
nodule	ROV5_20	Proteobacteria	ExbD-family	ExbD	iron aquisition siderophore transport potential
nodule	ROV5_20	Proteobacteria	ExbB-family	ExbB	iron aquisition siderophore transport potential
nodule	ROV5_20	Proteobacteria	FbpB-FutB-family-iron-permease	FbpB	iron aquisition iron transport
nodule	9CJW_91	Proteobacteria	ExbD-family	ExbD	iron aquisition siderophore transport potential
nodule	9CJW_91	Proteobacteria	ExbB-family	ExbB	iron aquisition siderophore transport potential
nodule	9CJW_91	Proteobacteria	FbpB-FutB-family-iron-permease	FbpB	iron aquisition iron transport
nodule	ROV5_82	Bacteroidota	TonB-family	TonB	iron aquisition siderophore transport potential
nodule	ROV5_82	Bacteroidota	ExbB-family	ExbB	iron aquisition siderophore transport potential
nodule	ROV5_82	Bacteroidota	Sid_PvdS_regulator_Paeruginosa_PA2426_180620	PvdS	iron gene regulation
nodule	ROV5_82	Bacteroidota	PF04773_FecR	FecR	iron gene regulation
nodule	ROV5_82	Bacteroidota	Sid_PvdS_regulator_Paeruginosa_PA2426_180620	PvdS	iron gene regulation
nodule	ROV5_82	Bacteroidota	PF04773_FecR	FecR	iron gene regulation
nodule	ROV5_82	Bacteroidota	PF04773_FecR	FecR	iron gene regulation
nodule	ROV5_82	Bacteroidota	PF04773_FecR	FecR	iron gene regulation
nodule	ROV5_64	Proteobacteria	ExbD-family	ExbD	iron aquisition siderophore transport potential
nodule	ROV5_64	Proteobacteria	ExbB-family	ExbB	iron aquisition siderophore transport potential
nodule	ROV5_64	Proteobacteria	ExbB-family	ExbB	iron aquisition siderophore transport potential
nodule	ROV5_64	Proteobacteria	ExbD-family	ExbD	iron aquisition siderophore transport potential
nodule	ROV5_64	Proteobacteria	TonB-family	TonB	iron aquisition siderophore transport potential
nodule	ROV5_27	Proteobacteria	ExbD-family	ExbD	iron aquisition siderophore transport potential
nodule	ROV5_27	Proteobacteria	ExbB-family	ExbB	iron aquisition siderophore transport potential
nodule	ROV5_27	Proteobacteria	Sid_PvdS_regulator_Paeruginosa_PA2426_180620	PvdS	iron gene regulation
nodule	ROV5_27	Proteobacteria	PF04773_FecR	FecR	iron gene regulation
nodule	ROV5_27	Proteobacteria	ExbB-family	ExbB	iron aquisition siderophore transport potential
nodule	ROV5_27	Proteobacteria	ExbD-family	ExbD	iron aquisition siderophore transport potential
nodule	ROV5_27	Proteobacteria	TonB-family	TonB	iron aquisition siderophore transport potential
nodule	ROV5_27	Proteobacteria	ExbD-family	ExbD	iron aquisition siderophore transport potential
nodule	ROV5_27	Proteobacteria	TonB-family	TonB	iron aquisition siderophore transport potential
nodule	ROV5_27	Proteobacteria	PF04773_FecR	FecR	iron gene regulation
nodule	ROV5_27	Proteobacteria	PF04773_FecR	FecR	iron gene regulation
nodule	9CJW_65	Acidobacteriota	ExbD-family	ExbD	iron aquisition siderophore transport potential
nodule	9CJW_65	Acidobacteriota	ExbD-family	ExbD	iron aquisition siderophore transport potential
nodule	9CJW_65	Acidobacteriota	ExbB-family	ExbB	iron aquisition siderophore transport potential
nodule	9CJW_65	Acidobacteriota	Sid_PvdS_regulator_Paeruginosa_PA2426_180620	PvdS	iron gene regulation
nodule	9CJW_65	Acidobacteriota	Sid_PvdS_regulator_Paeruginosa_PA2426_180620	PvdS	iron gene regulation
nodule	9DJH_18	Acidobacteriota	Sid_PvdS_regulator_Paeruginosa_PA2426_180620	PvdS	iron gene regulation
nodule	9DJH_18	Acidobacteriota	Sid_PvdS_regulator_Paeruginosa_PA2426_180620	PvdS	iron gene regulation
nodule	9DJH_18	Acidobacteriota	PF04773_FecR	FecR	iron gene regulation
nodule	9DJH_18	Acidobacteriota	PF04773_FecR	FecR	iron gene regulation
nodule	ROV5_45	Proteobacteria	ExbB-family	ExbB	iron aquisition siderophore transport potential
nodule	ROV5_45	Proteobacteria	ExbD-family	ExbD	iron aquisition siderophore transport potential
nodule	ROV5_43	Nitrospinota	TonB-family	TonB	iron aquisition siderophore transport potential
nodule	ROV5_43	Nitrospinota	ExbD-family	ExbD	iron aquisition siderophore transport potential
nodule	ROV5_43	Nitrospinota	ExbB-family	ExbB	iron aquisition siderophore transport potential
nodule	ROV5_43	Nitrospinota	Sid_PvdS_regulator_Paeruginosa_PA2426_180620	PvdS	iron gene regulation
nodule	ROV5_18	Gemmatimonadota	Sid_PvdS_regulator_Paeruginosa_PA2426_180620	PvdS	iron gene regulation
nodule	ROV5_18	Gemmatimonadota	ExbB-family	ExbB	iron aquisition siderophore transport potential
nodule	ROV5_18	Gemmatimonadota	Sid_PvdS_regulator_Paeruginosa_PA2426_180620	PvdS	iron gene regulation
nodule	ROV5_18	Gemmatimonadota	TonB-family	TonB	iron aquisition siderophore transport potential
nodule	ROV5_18	Gemmatimonadota	ExbD-family	ExbD	iron aquisition siderophore transport potential
nodule	ROV5_18	Gemmatimonadota	ExbB-family	ExbB	iron aquisition siderophore transport potential
nodule	ROV5_18	Gemmatimonadota	TonB-family	TonB	iron aquisition siderophore transport potential
nodule	ROV5_18	Gemmatimonadota	ExbD-family	ExbD	iron aquisition siderophore transport potential
nodule	ROV5_18	Gemmatimonadota	ExbD-family	ExbD	iron aquisition siderophore transport potential
nodule	ROV5_18	Gemmatimonadota	ExbB-family	ExbB	iron aquisition siderophore transport potential
nodule	ROV5_18	Gemmatimonadota	Sid_PvdS_regulator_Paeruginosa_PA2426_180620	PvdS	iron gene regulation
nodule	ROV5_18	Gemmatimonadota	Sid_PvdS_regulator_Paeruginosa_PA2426_180620	PvdS	iron gene regulation
nodule	ROV5_18	Gemmatimonadota	Sid_PvdS_regulator_Paeruginosa_PA2426_180620	PvdS	iron gene regulation
nodule	9CJW_24	Nitrospinota	PF04773_FecR	FecR	iron gene regulation
nodule	9CJW_86	Nitrospirota	ExbD-family	ExbD	iron aquisition siderophore transport potential
nodule	9CJW_86	Nitrospirota	ExbB-family	ExbB	iron aquisition siderophore transport potential
nodule	9CJW_86	Nitrospirota	PF04773_FecR	FecR	iron gene regulation
nodule	ROV5_32	Gemmatimonadota	ExbB-family	ExbB	iron aquisition siderophore transport potential
nodule	ROV5_32	Gemmatimonadota	ExbD-family	ExbD	iron aquisition siderophore transport potential
nodule	ROV5_32	Gemmatimonadota	ExbD-family	ExbD	iron aquisition siderophore transport potential
nodule	ROV5_32	Gemmatimonadota	TonB-family	TonB	iron aquisition siderophore transport potential
nodule	ROV5_32	Gemmatimonadota	ExbB-family	ExbB	iron aquisition siderophore transport potential
nodule	ROV5_32	Gemmatimonadota	ExbD-family	ExbD	iron aquisition siderophore transport potential
nodule	ROV5_32	Gemmatimonadota	TonB-family	TonB	iron aquisition siderophore transport potential
nodule	ROV5_32	Gemmatimonadota	Sid_PvdS_regulator_Paeruginosa_PA2426_180620	PvdS	iron gene regulation
nodule	ROV5_32	Gemmatimonadota	Sid_PvdS_regulator_Paeruginosa_PA2426_180620	PvdS	iron gene regulation
nodule	ROV5_32	Gemmatimonadota	Sid_PvdS_regulator_Paeruginosa_PA2426_180620	PvdS	iron gene regulation
nodule	ROV5_32	Gemmatimonadota	Sid_PvdS_regulator_Paeruginosa_PA2426_180620	PvdS	iron gene regulation
nodule	ROV5_32	Gemmatimonadota	Sid_PvdS_regulator_Paeruginosa_PA2426_180620	PvdS	iron gene regulation
nodule	ROV5_32	Gemmatimonadota	Sid_PvdS_regulator_Paeruginosa_PA2426_180620	PvdS	iron gene regulation
nodule	ROV5_32	Gemmatimonadota	PF04773_FecR	FecR	iron gene regulation
nodule	ROV5_53	Acidobacteriota	TonB-family	TonB	iron aquisition siderophore transport potential
nodule	ROV5_53	Acidobacteriota	ExbD-family	ExbD	iron aquisition siderophore transport potential
nodule	ROV5_53	Acidobacteriota	ExbB-family	ExbB	iron aquisition siderophore transport potential
nodule	ROV5_53	Acidobacteriota	Sid_PvdS_regulator_Paeruginosa_PA2426_180620	PvdS	iron gene regulation
nodule	ROV5_53	Acidobacteriota	Sid_PvdS_regulator_Paeruginosa_PA2426_180620	PvdS	iron gene regulation
nodule	ROV5_53	Acidobacteriota	PF04773_FecR	FecR	iron gene regulation
nodule	ROV5_60	Acidobacteriota	PF04773_FecR	FecR	iron gene regulation
nodule	9DJH_8	Proteobacteria	TonB-family	TonB	iron aquisition siderophore transport potential
nodule	9DJH_8	Proteobacteria	ExbD-family	ExbD	iron aquisition siderophore transport potential
nodule	9DJH_8	Proteobacteria	ExbB-family	ExbB	iron aquisition siderophore transport potential
nodule	9DJH_8	Proteobacteria	ExbD-family	ExbD	iron aquisition siderophore transport potential
nodule	9DJH_8	Proteobacteria	ExbB-family	ExbB	iron aquisition siderophore transport potential
nodule	9DJH_8	Proteobacteria	PF04773_FecR	FecR	iron gene regulation
nodule	9DJH_8	Proteobacteria	FbpB-FutB-family-iron-permease	FbpB	iron aquisition iron transport
nodule	ROV5_48	Bacteroidota	ExbD-family	ExbD	iron aquisition siderophore transport potential
nodule	ROV5_48	Bacteroidota	ExbB-family	ExbB	iron aquisition siderophore transport potential
nodule	ROV5_48	Bacteroidota	Sid_PvdS_regulator_Paeruginosa_PA2426_180620	PvdS	iron gene regulation
nodule	ROV5_25	Desulfobacterota_D	ExbB-family	ExbB	iron aquisition siderophore transport potential
nodule	ROV5_25	Desulfobacterota_D	ExbD-family	ExbD	iron aquisition siderophore transport potential
nodule	ROV5_25	Desulfobacterota_D	ExbB-family	ExbB	iron aquisition siderophore transport potential
nodule	ROV5_25	Desulfobacterota_D	ExbD-family	ExbD	iron aquisition siderophore transport potential
nodule	ROV5_25	Desulfobacterota_D	Sid_PvdS_regulator_Paeruginosa_PA2426_180620	PvdS	iron gene regulation
nodule	ROV5_25	Desulfobacterota_D	Sid_PvdS_regulator_Paeruginosa_PA2426_180620	PvdS	iron gene regulation
nodule	ROV5_25	Desulfobacterota_D	Sid_PvdS_regulator_Paeruginosa_PA2426_180620	PvdS	iron gene regulation
nodule	9CJW_34	Proteobacteria	TonB-family	TonB	iron aquisition siderophore transport potential
nodule	9CJW_34	Proteobacteria	ExbD-family	ExbD	iron aquisition siderophore transport potential
nodule	9CJW_34	Proteobacteria	ExbB-family	ExbB	iron aquisition siderophore transport potential
nodule	9CJW_34	Proteobacteria	PF04773_FecR	FecR	iron gene regulation
nodule	9CJW_34	Proteobacteria	PF04773_FecR	FecR	iron gene regulation
nodule	ROV5_23	Proteobacteria	ExbD-family	ExbD	iron aquisition siderophore transport potential
nodule	ROV5_23	Proteobacteria	ExbB-family	ExbB	iron aquisition siderophore transport potential
nodule	ROV5_23	Proteobacteria	ExbB-family	ExbB	iron aquisition siderophore transport potential
nodule	ROV5_23	Proteobacteria	ExbD-family	ExbD	iron aquisition siderophore transport potential
nodule	ROV5_23	Proteobacteria	PF04773_FecR	FecR	iron gene regulation
nodule	ROV5_23	Proteobacteria	PF04773_FecR	FecR	iron gene regulation
nodule	ROV5_23	Proteobacteria	TonB-family	TonB	iron aquisition siderophore transport potential
nodule	ROV5_23	Proteobacteria	ExbD-family	ExbD	iron aquisition siderophore transport potential
nodule	ROV5_23	Proteobacteria	ExbB-family	ExbB	iron aquisition siderophore transport potential
nodule	ROV5_23	Proteobacteria	Sid_PvdS_regulator_Paeruginosa_PA2426_180620	PvdS	iron gene regulation
nodule	ROV5_65	Proteobacteria	ExbD-family	ExbD	iron aquisition siderophore transport potential
nodule	ROV5_65	Proteobacteria	ExbB-family	ExbB	iron aquisition siderophore transport potential
nodule	ROV5_65	Proteobacteria	ExbD-family	ExbD	iron aquisition siderophore transport potential
nodule	ROV5_65	Proteobacteria	ExbD-family	ExbD	iron aquisition siderophore transport potential
nodule	ROV5_65	Proteobacteria	ExbB-family	ExbB	iron aquisition siderophore transport potential
nodule	ROV5_65	Proteobacteria	ExbB-family	ExbB	iron aquisition siderophore transport potential
nodule	ROV5_65	Proteobacteria	Sid_PvdS_regulator_Paeruginosa_PA2426_180620	PvdS	iron gene regulation
nodule	ROV5_65	Proteobacteria	PF04773_FecR	FecR	iron gene regulation
nodule	ROV5_65	Proteobacteria	PF04773_FecR	FecR	iron gene regulation
nodule	ROV5_65	Proteobacteria	PF04773_FecR	FecR	iron gene regulation
nodule	ROV5_65	Proteobacteria	PF04773_FecR	FecR	iron gene regulation
nodule	ROV5_40	Proteobacteria	FbpB-FutB-family-iron-permease	FbpB	iron aquisition iron transport
nodule	ROV5_40	Proteobacteria	ExbD-family	ExbD	iron aquisition siderophore transport potential
nodule	ROV5_40	Proteobacteria	ExbB-family	ExbB	iron aquisition siderophore transport potential
nodule	ROV5_40	Proteobacteria	PF04773_FecR	FecR	iron gene regulation
nodule	ROV5_40	Proteobacteria	ExbB-family	ExbB	iron aquisition siderophore transport potential
nodule	ROV5_40	Proteobacteria	ExbD-family	ExbD	iron aquisition siderophore transport potential
nodule	ROV5_40	Proteobacteria	TonB-family	TonB	iron aquisition siderophore transport potential
nodule	ROV5_40	Proteobacteria	Sid_PvdS_regulator_Paeruginosa_PA2426_180620	PvdS	iron gene regulation
nodule	ROV5_40	Proteobacteria	FbpB-family-iron-permease	FbpB	iron aquisition iron transport
nodule	ROV5_101	Proteobacteria	ExbB-family	ExbB	iron aquisition siderophore transport potential
nodule	ROV5_101	Proteobacteria	ExbD-family	ExbD	iron aquisition siderophore transport potential
nodule	ROV5_101	Proteobacteria	Sid_PvdS_regulator_Paeruginosa_PA2426_180620	PvdS	iron gene regulation
nodule	ROV5_101	Proteobacteria	Sid_PvdS_regulator_Paeruginosa_PA2426_180620	PvdS	iron gene regulation
nodule	ROV5_33	Proteobacteria	PF04773_FecR	FecR	iron gene regulation
nodule	ROV5_33	Proteobacteria	ExbB-family	ExbB	iron aquisition siderophore transport potential
nodule	ROV5_33	Proteobacteria	ExbB-family	ExbB	iron aquisition siderophore transport potential
nodule	ROV5_33	Proteobacteria	ExbD-family	ExbD	iron aquisition siderophore transport potential
nodule	ROV5_33	Proteobacteria	TonB-family	TonB	iron aquisition siderophore transport potential
nodule	ROV5_33	Proteobacteria	Sid_PvdS_regulator_Paeruginosa_PA2426_180620	PvdS	iron gene regulation
nodule	ROV5_33	Proteobacteria	PF04773_FecR	FecR	iron gene regulation
nodule	ROV5_35	Nitrospirota	FbpB-FutB-family-iron-permease	FbpB	iron aquisition iron transport
nodule	ROV5_35	Nitrospirota	Sid_PvdS_regulator_Paeruginosa_PA2426_180620	PvdS	iron gene regulation
nodule	9CJW_48	Proteobacteria	Sid_PvdS_regulator_Paeruginosa_PA2426_180620	PvdS	iron gene regulation
nodule	9CJW_48	Proteobacteria	PF04773_FecR	FecR	iron gene regulation
nodule	9CJW_48	Proteobacteria	Sid_PvdS_regulator_Paeruginosa_PA2426_180620	PvdS	iron gene regulation
nodule	9CJW_48	Proteobacteria	Sid_PvdS_regulator_Paeruginosa_PA2426_180620	PvdS	iron gene regulation
nodule	9CJW_48	Proteobacteria	PF04773_FecR	FecR	iron gene regulation
nodule	9CJW_48	Proteobacteria	Sid_PvdS_regulator_Paeruginosa_PA2426_180620	PvdS	iron gene regulation
nodule	9CJW_48	Proteobacteria	PF04773_FecR	FecR	iron gene regulation
nodule	9CJW_48	Proteobacteria	PF04773_FecR	FecR	iron gene regulation
nodule	ROV5_54	Proteobacteria	ExbD-family	ExbD	iron aquisition siderophore transport potential
nodule	ROV5_54	Proteobacteria	ExbB-family	ExbB	iron aquisition siderophore transport potential
nodule	ROV5_54	Proteobacteria	ExbB-family	ExbB	iron aquisition siderophore transport potential
nodule	ROV5_54	Proteobacteria	ExbD-family	ExbD	iron aquisition siderophore transport potential
nodule	ROV5_54	Proteobacteria	ExbD-family	ExbD	iron aquisition siderophore transport potential
nodule	ROV5_54	Proteobacteria	ExbD-family	ExbD	iron aquisition siderophore transport potential
nodule	ROV5_54	Proteobacteria	ExbB-family	ExbB	iron aquisition siderophore transport potential
nodule	ROV5_54	Proteobacteria	ExbB-family	ExbB	iron aquisition siderophore transport potential
nodule	ROV5_54	Proteobacteria	ExbD-family	ExbD	iron aquisition siderophore transport potential
nodule	ROV5_54	Proteobacteria	TonB-family	TonB	iron aquisition siderophore transport potential
nodule	ROV5_54	Proteobacteria	PF04773_FecR	FecR	iron gene regulation
nodule	ROV5_54	Proteobacteria	Sid_PvdS_regulator_Paeruginosa_PA2426_180620	PvdS	iron gene regulation
nodule	9CJW_21	Planctomycetota	ExbD-family	ExbD	iron aquisition siderophore transport potential
nodule	9CJW_21	Planctomycetota	ExbD-family	ExbD	iron aquisition siderophore transport potential
nodule	9CJW_21	Planctomycetota	ExbB-family	ExbB	iron aquisition siderophore transport potential
nodule	9CJW_21	Planctomycetota	Sid_PvdS_regulator_Paeruginosa_PA2426_180620	PvdS	iron gene regulation
nodule	9CJW_21	Planctomycetota	Sid_PvdS_regulator_Paeruginosa_PA2426_180620	PvdS	iron gene regulation
nodule	9CJW_21	Planctomycetota	Sid_PvdS_regulator_Paeruginosa_PA2426_180620	PvdS	iron gene regulation
nodule	9CJW_21	Planctomycetota	ExbB-family	ExbB	iron aquisition siderophore transport potential
nodule	9CJW_21	Planctomycetota	ExbD-family	ExbD	iron aquisition siderophore transport potential
nodule	9CJW_21	Planctomycetota	Sid_PvdS_regulator_Paeruginosa_PA2426_180620	PvdS	iron gene regulation
nodule	9CJW_21	Planctomycetota	Sid_PvdS_regulator_Paeruginosa_PA2426_180620	PvdS	iron gene regulation
nodule	9CJW_74	Proteobacteria	ExbB-family	ExbB	iron aquisition siderophore transport potential
nodule	9CJW_74	Proteobacteria	ExbD-family	ExbD	iron aquisition siderophore transport potential
nodule	9CJW_74	Proteobacteria	ExbB-family	ExbB	iron aquisition siderophore transport potential
nodule	9CJW_74	Proteobacteria	ExbD-family	ExbD	iron aquisition siderophore transport potential
nodule	9CJW_74	Proteobacteria	FbpB-FutB-family-iron-permease	FbpB	iron aquisition iron transport
nodule	ROV5_79	Chloroflexota	PF04773_FecR	FecR	iron gene regulation
nodule	ROV5_79	Chloroflexota	FbpB-FutB-family-iron-permease	FbpB	iron aquisition iron transport
nodule	ROV5_79	Chloroflexota	FbpB-FutB-family-iron-permease	FbpB	iron aquisition iron transport
nodule	9CJW_2	Proteobacteria	ExbD-family	ExbD	iron aquisition siderophore transport potential
nodule	9CJW_2	Proteobacteria	ExbB-family	ExbB	iron aquisition siderophore transport potential
nodule	9CJW_2	Proteobacteria	Sid_PvdS_regulator_Paeruginosa_PA2426_180620	PvdS	iron gene regulation
nodule	9CJW_2	Proteobacteria	Sid_PvdS_regulator_Paeruginosa_PA2426_180620	PvdS	iron gene regulation
nodule	9CJW_2	Proteobacteria	PF04773_FecR	FecR	iron gene regulation
nodule	9CJW_2	Proteobacteria	FbpB-FutB-family-iron-permease	FbpB	iron aquisition iron transport
nodule	9DJH_21	Gemmatimonadota	Sid_PvdS_regulator_Paeruginosa_PA2426_180620	PvdS	iron gene regulation
nodule	9DJH_21	Gemmatimonadota	Sid_PvdS_regulator_Paeruginosa_PA2426_180620	PvdS	iron gene regulation
nodule	9DJH_21	Gemmatimonadota	ExbD-family	ExbD	iron aquisition siderophore transport potential
nodule	9DJH_21	Gemmatimonadota	ExbD-family	ExbD	iron aquisition siderophore transport potential
nodule	9DJH_21	Gemmatimonadota	TonB-family	TonB	iron aquisition siderophore transport potential
nodule	9DJH_21	Gemmatimonadota	TonB-family	TonB	iron aquisition siderophore transport potential
nodule	9DJH_21	Gemmatimonadota	Sid_PvdS_regulator_Paeruginosa_PA2426_180620	PvdS	iron gene regulation
nodule	9DJH_21	Gemmatimonadota	Sid_PvdS_regulator_Paeruginosa_PA2426_180620	PvdS	iron gene regulation
nodule	9DJH_21	Gemmatimonadota	Sid_PvdS_regulator_Paeruginosa_PA2426_180620	PvdS	iron gene regulation
nodule	9DJH_21	Gemmatimonadota	Sid_PvdS_regulator_Paeruginosa_PA2426_180620	PvdS	iron gene regulation
nodule	9CJW_70	Proteobacteria	ExbB-family	ExbB	iron aquisition siderophore transport potential
nodule	9CJW_70	Proteobacteria	ExbD-family	ExbD	iron aquisition siderophore transport potential
nodule	9CJW_70	Proteobacteria	ExbB-family	ExbB	iron aquisition siderophore transport potential
nodule	9CJW_70	Proteobacteria	ExbD-family	ExbD	iron aquisition siderophore transport potential
nodule	9CJW_70	Proteobacteria	TonB-family	TonB	iron aquisition siderophore transport potential
nodule	9CJW_70	Proteobacteria	ExbB-family	ExbB	iron aquisition siderophore transport potential
nodule	9CJW_70	Proteobacteria	ExbD-family	ExbD	iron aquisition siderophore transport potential
nodule	9CJW_70	Proteobacteria	ExbD-family	ExbD	iron aquisition siderophore transport potential
nodule	9CJW_70	Proteobacteria	PF04773_FecR	FecR	iron gene regulation
nodule	9CJW_22	Proteobacteria	FbpB-FutB-family-iron-permease	FbpB	iron aquisition iron transport
nodule	9CJW_22	Proteobacteria	FbpB-family-iron-permease	FbpB	iron aquisition iron transport
nodule	9CJW_22	Proteobacteria	FbpB-family-iron-permease	FbpB	iron aquisition iron transport
nodule	9CJW_22	Proteobacteria	ExbD-family	ExbD	iron aquisition siderophore transport potential
nodule	9CJW_22	Proteobacteria	ExbB-family	ExbB	iron aquisition siderophore transport potential
[truncated: 560 more rows]

## Sheet: S9
Table S9. HGT annotation information of MAGs from the deep-sea nodule area.
[truncated: 304 more rows]

[truncated: 3 more sheets: S10, S11, S12]
